# Supplementary material for: Higher gene expression stability during aging in long-lived giant mole-rats than in short-lived rats
Source: Aging (Albany NY). 2018 Dec 16;10(12):3938–56. doi: 10.18632/aging.101683 (PMC6326690; doi:10.18632/aging.101683)
Supplement: Supplementary Tables S1-S34 [file aging-10-101683-s002.xlsx]

## Sheet: S1 Animals
Table S1. Overview of examined animals.
Animal ID	Species	Sex	Age class	sampling date	Precise age at sampling (years)	Age associated survial in species at sampling age*	Tissue samples used in this study
EJ1	R. norvegivus	male	young	2016-11-08	0.5	>95%	all (blood, heart, kidney, liver, skin)
EJ2	R. norvegivus	male	young	2016-11-08	0.5	>95%	all
EJ3	R. norvegivus	male	young	2016-11-08	0.5	>95%	all
EJ4	R. norvegivus	male	young	2016-11-08	0.5	>95%	all
EJ5	R. norvegivus	male	young	2016-11-08	0.5	>95%	all
JOA1	R. norvegivus	male	elderly	2016-04-05	2	39%	blood
JOA2	R. norvegivus	male	elderly	2016-04-05	2	39%	blood
JOA3	R. norvegivus	male	elderly	2016-04-05	2	39%	blood
JOA4	R. norvegivus	male	elderly	2016-04-05	2	39%	blood
JOB1	R. norvegivus	male	elderly	2016-10-11	2	39%	heart, kidney, liver, skin
JOB2	R. norvegivus	male	elderly	2016-10-11	2	39%	heart, kidney, liver, skin
JOB3	R. norvegivus	male	elderly	2016-10-11	2	39%	heart, kidney, liver, skin
JOB4	R. norvegivus	male	elderly	2016-10-11	2	39%	heart, kidney, liver, skin
132	F. mechowii	male	young	2014-02-28	1.34247	>95%	blood, skin
534	F. mechowii	male	young	2014-02-04	1.46027	>95%	blood, skin
757	F. mechowii	male	young	2016-12-22	1.43562	>95%	blood, skin
607	F. mechowii	male	young	2015-03-10	1.43562	>95%	blood, skin
780	F. mechowii	male	young	2014-02-27	1.52055	>95%	blood, skin
114	F. mechowii	male	young	2014-02-18	1.90137	>95%	blood, skin
498	F. mechowii	male	young	2015-03-17	1.95068	>95%	blood, skin
535	F. mechowii	male	young	2016-04-18	1.5	>95%	heart, kidney, liver
786	F. mechowii	male	young	2016-04-19	1.5	>95%	heart, kidney, liver
269	F. mechowii	male	young	2016-04-20	1.4	>95%	heart, kidney, liver
806	F. mechowii	male	young	2016-04-20	1.5	>95%	heart, kidney, liver
172	F. mechowii	male	elderly	2014-02-18	6.46575	23.8%	blood, skin
795	F. mechowii	male	elderly	2014-10-01	6.8274	23.8%	blood, skin
99 (1)	F. mechowii	male	elderly	2014-10-01	6.73699	23.8%	blood, skin
295	F. mechowii	male	elderly	2014-10-01	7.27123	23.8%	blood, skin
634	F. mechowii	male	elderly	2014-02-27	6.44658	23.8%	blood, skin
985	F. mechowii	male	elderly	2014-02-18	5.70959	47.6%	blood, skin
910	F. mechowii	male	elderly	2014-02-27	5.56438	47.6%	blood, skin
184 (1)	F. mechowii	male	elderly	2016-04-21	5.50137	47.6%	blood, skin
94	F. mechowii	male	elderly	2015-03-30	6.9	23.8%	heart, kidney, liver
99 (2)	F. mechowii	male	elderly	2015-03-19	7.2	23.8%	heart, kidney, liver
793	F. mechowii	male	elderly	2016-04-19	6.5	23.8%	heart, kidney, liver
184 (2)	F. mechowii	male	elderly	2016-04-21	7.7	23.8%	heart, kidney, liver
* Survival data from Dammann et al. PLoS One. 2011;6(4):e18757 and Carlus et al. Exp Toxicol Pathol. 2013;65(3):243-253.

## Sheet: S2 Mean ages
Table S2. Mean ages in years (with standard deviations) of examined animals by species, age cohort and tissue.
	Blood	Heart	Kidney	Liver	Skin	Grand mean	Age associated survival in species at grand mean age*
Young rats	0.5 (0)	0.5 (0)	0.5 (0)	0.5 (0)	0.5 (0)	0.5 (0)	>95 %
Elderly rats	2 (0)	2 (0)	2 (0)	2 (0)	2 (0)	2 (0)	39%
Young giant mole-rats	1.58 (0.24)	1.58 (0.24)	1.48 (0.05)	1.48 (0.05)	1.48 (0.05)	1.52 (0.13)	>95 %
Elderly giant mole-rats	6.32 (0.65)	7.08 (0.51)	7.08 (0.51)	7.08 (0.51)	6.32 (0.65)	6.77 (0.52)	23.8%
* Survival data from Dammann et al. PLoS One. 2011;6(4):e18757 and Carlus et al. Exp Toxicol Pathol. 2013;65(3):243-253.

## Sheet: S3 Overview sequencing
Table S3. Samples that were sequenced in this study.
Animal	Species	Age class	Tissue	Public ENA sample ID	Strategy	#Reads	#Uniquely mapped reads	%Uniquely mapped reads	Library selection	Library prep kit	Read length in bp	Machine	Data extraction	Sequencing date (YYMMDD, library preparation a few days before for each)
EJ1	Rattus norvegicus	young	blood	ERS2051299 (SAMEA104433357)	single-end	29252280	11931477	40.7882	oligo-dT	TruSeq RNA v2	51	HiSeq2500 high output	bcl2fastq v1.8.4	161202
EJ1	Rattus norvegicus	young	heart	ERS2051300 (SAMEA104433358)	single-end	33453078	16498680	49.3189	oligo-dT	TruSeq RNA v2	51	HiSeq2500 high output	bcl2fastq v1.8.4	161202
EJ1	Rattus norvegicus	young	kidney	ERS2051301 (SAMEA104433359)	single-end	32627383	20576769	63.0659	oligo-dT	TruSeq RNA v2	51	HiSeq2500 high output	bcl2fastq v1.8.4	161202
EJ1	Rattus norvegicus	young	liver	ERS2051302 (SAMEA104433360)	single-end	34752342	24885720	71.6088	oligo-dT	TruSeq RNA v2	51	HiSeq2500 high output	bcl2fastq v1.8.4	161202
EJ1	Rattus norvegicus	young	skin	ERS2051303 (SAMEA104433361)	single-end	27463084	19188122	69.8688	oligo-dT	TruSeq RNA v2	51	HiSeq2500 high output	bcl2fastq v1.8.4	161202
EJ2	Rattus norvegicus	young	blood	ERS2051304 (SAMEA104433362)	single-end	29222322	12267973	41.9815	oligo-dT	TruSeq RNA v2	51	HiSeq2500 high output	bcl2fastq v1.8.4	161202
EJ2	Rattus norvegicus	young	heart	ERS2051305 (SAMEA104433363)	single-end	32506805	16010416	49.2525	oligo-dT	TruSeq RNA v2	51	HiSeq2500 high output	bcl2fastq v1.8.4	161202
EJ2	Rattus norvegicus	young	kidney	ERS2051306 (SAMEA104433364)	single-end	23411086	14762425	63.0574	oligo-dT	TruSeq RNA v2	51	HiSeq2500 high output	bcl2fastq v1.8.4	161202
EJ2	Rattus norvegicus	young	liver	ERS2051307 (SAMEA104433365)	single-end	34511706	25215805	73.0645	oligo-dT	TruSeq RNA v2	51	HiSeq2500 high output	bcl2fastq v1.8.4	161202
EJ2	Rattus norvegicus	young	skin	ERS2051308 (SAMEA104433366)	single-end	28410286	20156007	70.9462	oligo-dT	TruSeq RNA v2	51	HiSeq2500 high output	bcl2fastq v1.8.4	161202
EJ3	Rattus norvegicus	young	blood	ERS2051309 (SAMEA104433367)	single-end	17440627	7531232	43.1821	oligo-dT	TruSeq RNA v2	51	HiSeq2500 high output	bcl2fastq v1.8.4	161202
EJ3	Rattus norvegicus	young	heart	ERS2051310 (SAMEA104433368)	single-end	32686683	16549414	50.6304	oligo-dT	TruSeq RNA v2	51	HiSeq2500 high output	bcl2fastq v1.8.4	161202
EJ3	Rattus norvegicus	young	kidney	ERS2051311 (SAMEA104433369)	single-end	27155713	21676410	79.8227	oligo-dT	TruSeq RNA v2	51	HiSeq2500 high output	bcl2fastq v1.8.4	170104
EJ3	Rattus norvegicus	young	liver	ERS2051312 (SAMEA104433370)	single-end	25685260	19754382	76.9094	oligo-dT	TruSeq RNA v2	51	HiSeq2500 high output	bcl2fastq v1.8.4	161202
EJ3	Rattus norvegicus	young	skin	ERS2051313 (SAMEA104433371)	single-end	36272508	17263651	47.5943	oligo-dT	TruSeq RNA v2	51	HiSeq2500 high output	bcl2fastq v1.8.4	161202
EJ4	Rattus norvegicus	young	blood	ERS2051314 (SAMEA104433372)	single-end	34895860	15260900	43.7327	oligo-dT	TruSeq RNA v2	51	HiSeq2500 high output	bcl2fastq v1.8.4	161202
EJ4	Rattus norvegicus	young	heart	ERS2051315 (SAMEA104433373)	single-end	29285607	14755816	50.3859	oligo-dT	TruSeq RNA v2	51	HiSeq2500 high output	bcl2fastq v1.8.4	161202
EJ4	Rattus norvegicus	young	kidney	ERS2051316 (SAMEA104433374)	single-end	26571133	24902402	93.7198	oligo-dT	TruSeq RNA v2	51	HiSeq2500 high output	bcl2fastq v1.8.4	170104
EJ4	Rattus norvegicus	young	liver	ERS2051317 (SAMEA104433375)	single-end	26301901	19574108	74.4209	oligo-dT	TruSeq RNA v2	51	HiSeq2500 high output	bcl2fastq v1.8.4	161202
EJ4	Rattus norvegicus	young	skin	ERS2051318 (SAMEA104433376)	single-end	42045203	17955322	42.7048	oligo-dT	TruSeq RNA v2	51	HiSeq2500 high output	bcl2fastq v1.8.4	161202
EJ5	Rattus norvegicus	young	blood	ERS2051319 (SAMEA104433377)	single-end	22448952	10079750	44.9008	oligo-dT	TruSeq RNA v2	51	HiSeq2500 high output	bcl2fastq v1.8.4	161202
EJ5	Rattus norvegicus	young	heart	ERS2051320 (SAMEA104433378)	single-end	32829908	16899181	51.475	oligo-dT	TruSeq RNA v2	51	HiSeq2500 high output	bcl2fastq v1.8.4	161202
EJ5	Rattus norvegicus	young	kidney	ERS2051321 (SAMEA104433379)	single-end	26765088	24880119	92.9574	oligo-dT	TruSeq RNA v2	51	HiSeq2500 high output	bcl2fastq v1.8.4	170104
EJ5	Rattus norvegicus	young	liver	ERS2051322 (SAMEA104433380)	single-end	28836720	18942191	65.6877	oligo-dT	TruSeq RNA v2	51	HiSeq2500 high output	bcl2fastq v1.8.4	161202
EJ5	Rattus norvegicus	young	skin	ERS2051323 (SAMEA104433381)	single-end	40141334	19970827	49.7513	oligo-dT	TruSeq RNA v2	51	HiSeq2500 high output	bcl2fastq v1.8.4	161202
JOA1	Rattus norvegicus	old	blood	ERS2051324 (SAMEA104433382)	single-end	28051224	14088692	50.2249	oligo-dT	TruSeq RNA v2	51	HiSeq2500 high output	bcl2fastq v1.8.4	161202
JOB1	Rattus norvegicus	old	heart	ERS2051325 (SAMEA104433383)	single-end	35034738	17297695	49.373	oligo-dT	TruSeq RNA v2	51	HiSeq2500 high output	bcl2fastq v1.8.4	161202
JOB1	Rattus norvegicus	old	kidney	ERS2051326 (SAMEA104433384)	single-end	29636802	15546603	52.4571	oligo-dT	TruSeq RNA v2	51	HiSeq2500 high output	bcl2fastq v1.8.4	161202
JOB1	Rattus norvegicus	old	liver	ERS2051327 (SAMEA104433385)	single-end	23281371	16441352	70.6202	oligo-dT	TruSeq RNA v2	51	HiSeq2500 high output	bcl2fastq v1.8.4	161202
JOB1	Rattus norvegicus	old	skin	ERS2051328 (SAMEA104433386)	single-end	24679460	17048288	69.0789	oligo-dT	TruSeq RNA v2	51	HiSeq2500 high output	bcl2fastq v1.8.4	161202
JOA2	Rattus norvegicus	old	blood	ERS2051329 (SAMEA104433387)	single-end	21145047	10108646	47.8062	oligo-dT	TruSeq RNA v2	51	HiSeq2500 high output	bcl2fastq v1.8.4	161202
JOB2	Rattus norvegicus	old	heart	ERS2051330 (SAMEA104433388)	single-end	30782773	15537345	50.4742	oligo-dT	TruSeq RNA v2	51	HiSeq2500 high output	bcl2fastq v1.8.4	161202
JOB2	Rattus norvegicus	old	kidney	ERS2051331 (SAMEA104433389)	single-end	31193689	19135890	61.3454	oligo-dT	TruSeq RNA v2	51	HiSeq2500 high output	bcl2fastq v1.8.4	161202
JOB2	Rattus norvegicus	old	liver	ERS2051332 (SAMEA104433390)	single-end	25282911	18586798	73.5153	oligo-dT	TruSeq RNA v2	51	HiSeq2500 high output	bcl2fastq v1.8.4	161202
JOB2	Rattus norvegicus	old	skin	ERS2051333 (SAMEA104433391)	single-end	28121944	20037336	71.2516	oligo-dT	TruSeq RNA v2	51	HiSeq2500 high output	bcl2fastq v1.8.4	161202
JOA3	Rattus norvegicus	old	blood	ERS2051334 (SAMEA104433392)	single-end	30776897	14085853	45.7676	oligo-dT	TruSeq RNA v2	51	HiSeq2500 high output	bcl2fastq v1.8.4	161202
JOB3	Rattus norvegicus	old	heart	ERS2051335 (SAMEA104433393)	single-end	29587772	15319578	51.7767	oligo-dT	TruSeq RNA v2	51	HiSeq2500 high output	bcl2fastq v1.8.4	161202
JOB3	Rattus norvegicus	old	kidney	ERS2051336 (SAMEA104433394)	single-end	28920809	18896449	65.3386	oligo-dT	TruSeq RNA v2	51	HiSeq2500 high output	bcl2fastq v1.8.4	161202
JOB3	Rattus norvegicus	old	liver	ERS2051337 (SAMEA104433395)	single-end	30513469	23327482	76.4498	oligo-dT	TruSeq RNA v2	51	HiSeq2500 high output	bcl2fastq v1.8.4	161202
JOB3	Rattus norvegicus	old	skin	ERS2051338 (SAMEA104433396)	single-end	21277499	14733304	69.2436	oligo-dT	TruSeq RNA v2	51	HiSeq2500 high output	bcl2fastq v1.8.4	161202
JOA4	Rattus norvegicus	old	blood	ERS2051339 (SAMEA104433397)	single-end	19377695	8859136	45.7182	oligo-dT	TruSeq RNA v2	51	HiSeq2500 high output	bcl2fastq v1.8.4	161202
JOB4	Rattus norvegicus	old	heart	ERS2051340 (SAMEA104433398)	single-end	31056758	16836072	54.2107	oligo-dT	TruSeq RNA v2	51	HiSeq2500 high output	bcl2fastq v1.8.4	161202
JOB4	Rattus norvegicus	old	kidney	ERS2051341 (SAMEA104433399)	single-end	31757091	19410334	61.1213	oligo-dT	TruSeq RNA v2	51	HiSeq2500 high output	bcl2fastq v1.8.4	161202
JOB4	Rattus norvegicus	old	liver	ERS2051342 (SAMEA104433400)	single-end	32716653	24550012	75.0383	oligo-dT	TruSeq RNA v2	51	HiSeq2500 high output	bcl2fastq v1.8.4	161202
JOB4	Rattus norvegicus	old	skin	ERS2051343 (SAMEA104433401)	single-end	34938570	24885833	71.2274	oligo-dT	TruSeq RNA v2	51	HiSeq2500 high output	bcl2fastq v1.8.4	161202
535	Fukomys mechowii	young	heart	ERS2051344 (SAMEA104433402)	single-end	32936071	24607180	74.7119	oligo-dT	TruSeq RNA v2	51	HiSeq2500 high output	bcl2fastq v1.8.4	160513
535	Fukomys mechowii	young	kidney	ERS2051345 (SAMEA104433403)	single-end	28643804	19997042	69.8128	oligo-dT	TruSeq RNA v2	51	HiSeq2500 high output	bcl2fastq v1.8.4	160513
535	Fukomys mechowii	young	liver	ERS2051346 (SAMEA104433404)	single-end	26648031	18457082	69.2625	oligo-dT	TruSeq RNA v2	51	HiSeq2500 high output	bcl2fastq v1.8.4	160513
786	Fukomys mechowii	young	heart	ERS2051347 (SAMEA104433405)	single-end	26275230	20143289	76.6627	oligo-dT	TruSeq RNA v2	51	HiSeq2500 high output	bcl2fastq v1.8.4	160513
786	Fukomys mechowii	young	kidney	ERS2051348 (SAMEA104433406)	single-end	27932238	19448486	69.6274	oligo-dT	TruSeq RNA v2	51	HiSeq2500 high output	bcl2fastq v1.8.4	160513
786	Fukomys mechowii	young	liver	ERS2051349 (SAMEA104433407)	single-end	29094539	19716656	67.7675	oligo-dT	TruSeq RNA v2	51	HiSeq2500 high output	bcl2fastq v1.8.4	160513
269	Fukomys mechowii	young	heart	ERS2051350 (SAMEA104433408)	single-end	34627447	25942093	74.9177	oligo-dT	TruSeq RNA v2	51	HiSeq2500 high output	bcl2fastq v1.8.4	160513
269	Fukomys mechowii	young	kidney	ERS2051351 (SAMEA104433409)	single-end	32555739	22368825	68.7093	oligo-dT	TruSeq RNA v2	51	HiSeq2500 high output	bcl2fastq v1.8.4	160513
269	Fukomys mechowii	young	liver	ERS2051352 (SAMEA104433410)	single-end	33287629	23231542	69.7903	oligo-dT	TruSeq RNA v2	51	HiSeq2500 high output	bcl2fastq v1.8.4	160513
806	Fukomys mechowii	young	heart	ERS2051353 (SAMEA104433411)	single-end	26753808	20226109	75.6009	oligo-dT	TruSeq RNA v2	51	HiSeq2500 high output	bcl2fastq v1.8.4	160513
806	Fukomys mechowii	young	kidney	ERS2051354 (SAMEA104433412)	single-end	27592011	19114121	69.2741	oligo-dT	TruSeq RNA v2	51	HiSeq2500 high output	bcl2fastq v1.8.4	160513
806	Fukomys mechowii	young	liver	ERS2051355 (SAMEA104433413)	single-end	30300952	21354448	70.4745	oligo-dT	TruSeq RNA v2	51	HiSeq2500 high output	bcl2fastq v1.8.4	160513
94	Fukomys mechowii	old	heart	ERS2051356 (SAMEA104433414)	single-end	20300454	16293654	80.2625	oligo-dT	TruSeq RNA v2	51	HiSeq2500 high output	bcl2fastq v1.8.4	150722
94	Fukomys mechowii	old	kidney	ERS2051357 (SAMEA104433415)	single-end	23804604	16775131	70.4701	oligo-dT	TruSeq RNA v2	51	HiSeq2500 high output	bcl2fastq v1.8.4	151113, 151119
94	Fukomys mechowii	old	liver	ERS2051358 (SAMEA104433416)	single-end	25383105	17659632	69.5724	oligo-dT	TruSeq RNA v2	51	HiSeq2500 high output	bcl2fastq v1.8.4	151113
99	Fukomys mechowii	old	blood	ERS2051359 (SAMEA104433417)	single-end	35727114	24548427	68.7109	oligo-dT	TruSeq RNA v2	51	HiSeq2500 high output	bcl2fastq v1.8.4	141117
99	Fukomys mechowii	old	heart	ERS2051360 (SAMEA104433418)	single-end	22328261	17647668	79.0374	oligo-dT	TruSeq RNA v2	51	HiSeq2500 high output	bcl2fastq v1.8.4	150722
99	Fukomys mechowii	old	kidney	ERS2051361 (SAMEA104433419)	single-end	22150506	15687538	70.8225	oligo-dT	TruSeq RNA v2	51	HiSeq2500 high output	bcl2fastq v1.8.4	151113
99	Fukomys mechowii	old	liver	ERS2051362 (SAMEA104433420)	single-end	27634309	19855561	71.8511	oligo-dT	TruSeq RNA v2	51	HiSeq2500 high output	bcl2fastq v1.8.4	151113
99	Fukomys mechowii	old	skin	ERS2051363 (SAMEA104433421)	single-end	32393476	20669364	63.8072	oligo-dT	TruSeq RNA v2	51	HiSeq2500 high output	bcl2fastq v1.8.4	141117
793	Fukomys mechowii	old	heart	ERS2051364 (SAMEA104433422)	single-end	33797873	26234531	77.6218	oligo-dT	TruSeq RNA v2	51	HiSeq2500 high output	bcl2fastq v1.8.4	160513
793	Fukomys mechowii	old	kidney	ERS2051365 (SAMEA104433423)	single-end	26067395	16474123	63.1982	oligo-dT	TruSeq RNA v2	51	HiSeq2500 high output	bcl2fastq v1.8.4	160513
793	Fukomys mechowii	old	liver	ERS2051366 (SAMEA104433424)	single-end	29289182	20683437	70.618	oligo-dT	TruSeq RNA v2	51	HiSeq2500 high output	bcl2fastq v1.8.4	160513
184	Fukomys mechowii	old	blood	ERS2051367 (SAMEA104433425)	single-end	39818638	23814305	59.8069	oligo-dT	TruSeq RNA v2	51	HiSeq2500 high output	bcl2fastq v1.8.4	141126, 141201
184	Fukomys mechowii	old	heart	ERS2051368 (SAMEA104433426)	single-end	30165362	23756699	78.7549	oligo-dT	TruSeq RNA v2	51	HiSeq2500 high output	bcl2fastq v1.8.4	160513
184	Fukomys mechowii	old	kidney	ERS2051369 (SAMEA104433427)	single-end	22964007	16052494	69.9028	oligo-dT	TruSeq RNA v2	51	HiSeq2500 high output	bcl2fastq v1.8.4	160513
184	Fukomys mechowii	old	liver	ERS2051370 (SAMEA104433428)	single-end	26264848	18111824	68.9584	oligo-dT	TruSeq RNA v2	51	HiSeq2500 high output	bcl2fastq v1.8.4	160513
184	Fukomys mechowii	old	skin	ERS2051371 (SAMEA104433429)	single-end	37986710	24388935	64.2039	oligo-dT	TruSeq RNA v2	51	HiSeq2500 high output	bcl2fastq v1.8.4	141126
132	Fukomys mechowii	young	blood	ERS2051372 (SAMEA104433430)	single-end	34691879	21820581	62.8982	oligo-dT	TruSeq RNA v3	52	HiSeq2500 high output	bcl2fastq v1.8.5	141117
132	Fukomys mechowii	young	skin	ERS2051373 (SAMEA104433431)	single-end	30094320	20021445	66.529	oligo-dT	TruSeq RNA v4	53	HiSeq2500 high output	bcl2fastq v1.8.6	141117
534	Fukomys mechowii	young	blood	ERS2051374 (SAMEA104433432)	single-end	24566697	14364094	58.4698	oligo-dT	TruSeq RNA v5	54	HiSeq2500 high output	bcl2fastq v1.8.7	141117
534	Fukomys mechowii	young	skin	ERS2051375 (SAMEA104433433)	single-end	27853965	18576801	66.6936	oligo-dT	TruSeq RNA v6	55	HiSeq2500 high output	bcl2fastq v1.8.8	141117
757	Fukomys mechowii	young	blood	ERS2051376 (SAMEA104433434)	single-end	38583150	21607831	56.0033	oligo-dT	TruSeq RNA v7	56	HiSeq2500 high output	bcl2fastq v1.8.9	141117
757	Fukomys mechowii	young	skin	ERS2051377 (SAMEA104433435)	single-end	33868375	23071183	68.1201	oligo-dT	TruSeq RNA v8	57	HiSeq2500 high output	bcl2fastq v1.8.10	141117
607	Fukomys mechowii	young	blood	ERS2051378 (SAMEA104433436)	single-end	26899595	15693569	58.3413	oligo-dT	TruSeq RNA v9	58	HiSeq2500 high output	bcl2fastq v1.8.11	141117
607	Fukomys mechowii	young	skin	ERS2051379 (SAMEA104433437)	single-end	32161619	22095827	68.7025	oligo-dT	TruSeq RNA v10	59	HiSeq2500 high output	bcl2fastq v1.8.12	141117
780	Fukomys mechowii	young	blood	ERS2051380 (SAMEA104433438)	single-end	31117498	19204481	61.716	oligo-dT	TruSeq RNA v11	60	HiSeq2500 high output	bcl2fastq v1.8.13	141117
780	Fukomys mechowii	young	skin	ERS2051381 (SAMEA104433439)	single-end	25788787	16664736	64.6201	oligo-dT	TruSeq RNA v12	61	HiSeq2500 high output	bcl2fastq v1.8.14	141117
114	Fukomys mechowii	young	blood	ERS2051382 (SAMEA104433440)	single-end	29715970	18850354	63.4351	oligo-dT	TruSeq RNA v13	62	HiSeq2500 high output	bcl2fastq v1.8.15	141117
114	Fukomys mechowii	young	skin	ERS2051383 (SAMEA104433441)	single-end	25663944	16853094	65.6684	oligo-dT	TruSeq RNA v14	63	HiSeq2500 high output	bcl2fastq v1.8.16	141117
498	Fukomys mechowii	young	blood	ERS2051384 (SAMEA104433442)	single-end	21614542	13641317	63.1118	oligo-dT	TruSeq RNA v15	64	HiSeq2500 high output	bcl2fastq v1.8.17	141126
498	Fukomys mechowii	young	skin	ERS2051385 (SAMEA104433443)	single-end	27214518	17188201	63.1582	oligo-dT	TruSeq RNA v16	65	HiSeq2500 high output	bcl2fastq v1.8.18	141126
172	Fukomys mechowii	old	blood	ERS2051386 (SAMEA104433444)	single-end	28069003	16717773	59.5596	oligo-dT	TruSeq RNA v17	66	HiSeq2500 high output	bcl2fastq v1.8.19	141117
172	Fukomys mechowii	old	skin	ERS2051387 (SAMEA104433445)	single-end	31996751	21980550	68.6962	oligo-dT	TruSeq RNA v18	67	HiSeq2500 high output	bcl2fastq v1.8.20	141117
795	Fukomys mechowii	old	blood	ERS2051388 (SAMEA104433446)	single-end	22024208	13178947	59.8385	oligo-dT	TruSeq RNA v19	68	HiSeq2500 high output	bcl2fastq v1.8.21	141117
795	Fukomys mechowii	old	skin	ERS2051389 (SAMEA104433447)	single-end	31310499	20031847	63.9781	oligo-dT	TruSeq RNA v20	69	HiSeq2500 high output	bcl2fastq v1.8.22	141117
295	Fukomys mechowii	old	blood	ERS2051390 (SAMEA104433448)	single-end	29176845	17854139	61.1928	oligo-dT	TruSeq RNA v21	70	HiSeq2500 high output	bcl2fastq v1.8.23	141117
295	Fukomys mechowii	old	skin	ERS2051391 (SAMEA104433449)	single-end	26480527	16720007	63.1408	oligo-dT	TruSeq RNA v22	71	HiSeq2500 high output	bcl2fastq v1.8.24	141117
634	Fukomys mechowii	old	blood	ERS2051392 (SAMEA104433450)	single-end	29234117	18141843	62.0571	oligo-dT	TruSeq RNA v23	72	HiSeq2500 high output	bcl2fastq v1.8.25	141117
634	Fukomys mechowii	old	skin	ERS2051393 (SAMEA104433451)	single-end	28638086	20068101	70.0749	oligo-dT	TruSeq RNA v24	73	HiSeq2500 high output	bcl2fastq v1.8.26	141117
985	Fukomys mechowii	old	blood	ERS2051394 (SAMEA104433452)	single-end	29333204	17657268	60.1955	oligo-dT	TruSeq RNA v25	74	HiSeq2500 high output	bcl2fastq v1.8.27	141117
985	Fukomys mechowii	old	skin	ERS2051395 (SAMEA104433453)	single-end	30060742	18781587	62.4788	oligo-dT	TruSeq RNA v26	75	HiSeq2500 high output	bcl2fastq v1.8.28	141117
910	Fukomys mechowii	old	blood	ERS2051396 (SAMEA104433454)	single-end	27157052	16931630	62.3471	oligo-dT	TruSeq RNA v27	76	HiSeq2500 high output	bcl2fastq v1.8.29	141126
910	Fukomys mechowii	old	skin	ERS2051397 (SAMEA104433455)	single-end	26898764	17033057	63.3228	oligo-dT	TruSeq RNA v28	77	HiSeq2500 high output	bcl2fastq v1.8.30	141126

## Sheet: S4 DEG analysis rat blood
Table S4. Result of DESeq2-analysis for differentially expressed genes during aging in rat blood.
	baseMean	log2FoldChange	lfcSE	stat	pvalue	padj	ortholog_in_the_other_species
A1BG	0	NA	NA	NA	NA	NA	TRUE
A1CF	1.2529	0.538377	0.705413	0.763209	0.445339	0.584871	TRUE
A1I3	58.246	0.554008	0.550274	1.00679	0.314038	0.458737	FALSE
A26C2	0	NA	NA	NA	NA	NA	FALSE
A2M	0	NA	NA	NA	NA	NA	TRUE
A3GALT2	3.78433	-1.19027	0.619288	-1.92199	0.0546066	0.125882	FALSE
A4GALT	0.329797	0.407511	0.522269	0.780271	0.435232	NA	TRUE
A4GNT	0.27531	0.27519	0.530287	0.518946	0.603799	NA	TRUE
AAAS	37.8881	0.395663	0.330095	1.19863	0.23067	0.37164	TRUE
AACS	89.3751	-0.715143	0.190419	-3.75563	0.000172904	0.00121638	TRUE
AADAC	5.56074	-0.262803	0.715759	-0.367167	0.713495	0.806882	TRUE
AADACL2	0	NA	NA	NA	NA	NA	TRUE
AADACL3	0.505367	0.166558	0.576047	0.28914	0.772475	NA	FALSE
AADACL4	1.09571	-0.392629	0.684401	-0.573683	0.566182	0.692546	TRUE
AADAT	1.42984	1.23952	0.665962	1.86124	0.0627099	0.13966	TRUE
AAED1	5.27522	-0.356078	0.582509	-0.611283	0.541012	0.670879	TRUE
AAGAB	47.6157	-0.762231	0.245077	-3.11017	0.00186979	0.00860158	TRUE
AAK1	4.61864	0.307155	0.686238	0.447593	0.654447	0.763162	TRUE
AAMDC	11.881	1.10809	0.393708	2.81449	0.00488544	0.0189382	TRUE
AAMP	353.837	-0.0305213	0.27849	-0.109596	0.91273	0.94676	TRUE
AANAT	0	NA	NA	NA	NA	NA	TRUE
AAR2	31.3681	0.091699	0.295542	0.310274	0.756353	0.837979	TRUE
AARD	0.0278593	0.183262	0.520802	0.351885	0.724925	NA	TRUE
AARS	172.94	0.428925	0.241148	1.77868	0.0752924	0.16019	TRUE
AARS2	19.7108	-0.867538	0.425668	-2.03806	0.0415438	0.102535	TRUE
AARSD1	89.3823	1.15631	0.264698	4.36842	1.25148e-05	0.000136121	TRUE
AASDH	6.45974	-1.24996	0.50526	-2.4739	0.0133647	0.0423704	TRUE
AASDHPPT	29.2741	0.0581356	0.260982	0.222757	0.823725	0.886594	TRUE
AASS	3.8166	0.558159	0.54504	1.02407	0.305803	0.451654	TRUE
AATF	29.7164	0.574194	0.371099	1.54728	0.121795	0.231783	TRUE
AATK	0.657485	0.428977	0.651773	0.658168	0.51043	NA	TRUE
ABAT	2.14312	2.38301	0.714241	3.33642	0.000848648	0.00453093	TRUE
ABCA1	4.83524	-0.243488	0.603878	-0.403208	0.686795	0.787651	TRUE
ABCA12	0	NA	NA	NA	NA	NA	TRUE
ABCA13	0.27531	0.27519	0.530287	0.518946	0.603799	NA	TRUE
ABCA14	0	NA	NA	NA	NA	NA	FALSE
ABCA15	0	NA	NA	NA	NA	NA	FALSE
ABCA16	0.159488	0.342526	0.520932	0.657525	0.510843	NA	FALSE
ABCA17	0.37303	0.0790864	0.550776	0.143591	0.885823	NA	FALSE
ABCA2	122.022	-0.283286	0.20643	-1.37231	0.169967	0.296569	TRUE
ABCA3	110.419	-0.298136	0.191771	-1.55465	0.12003	0.229313	TRUE
ABCA4	120.401	0.573744	0.349118	1.64341	0.100298	0.199668	TRUE
ABCA5	0.156637	-0.0436952	0.523454	-0.0834749	0.933474	NA	TRUE
ABCA6	2.17717	1.3497	0.713184	1.89251	0.0584236	0.132593	TRUE
ABCA7	323.835	0.735314	0.199947	3.67756	0.00023548	0.00157961	TRUE
ABCA8	0	NA	NA	NA	NA	NA	FALSE
ABCA8A	2.80836	0.554131	0.543057	1.02039	0.307542	0.452535	FALSE
ABCA9	6.53487	-1.2991	0.702357	-1.84963	NA	NA	TRUE
ABCB10	84.1869	-0.273511	0.298841	-0.91524	0.360066	0.50236	TRUE
ABCB11	9.20501	2.29743	0.651961	3.52387	0.000425286	0.00257798	TRUE
ABCB1A	1.71545	0.444858	0.668023	0.665933	0.505454	0.639321	FALSE
ABCB1B	0.843194	0.585213	0.548846	1.06626	0.286306	NA	FALSE
ABCB4	16.1962	-0.136055	0.350612	-0.388051	0.697978	0.79616	TRUE
ABCB5	0	NA	NA	NA	NA	NA	TRUE
ABCB6	72.3463	0.467724	0.279069	1.67602	0.0937352	0.189306	TRUE
ABCB7	9.35617	0.448985	0.462734	0.970287	0.331904	0.47616	TRUE
ABCB8	25.5961	0.293276	0.301389	0.973082	0.330513	0.475073	TRUE
ABCB9	5.8486	0.752746	0.563738	1.33528	0.181786	0.311238	TRUE
ABCC1	18.9589	-0.61256	0.465811	-1.31504	0.188497	0.319606	TRUE
ABCC10	32.7692	0.232738	0.272583	0.853827	0.393201	0.534536	TRUE
ABCC12	0	NA	NA	NA	NA	NA	TRUE
ABCC2	3.17848	1.74043	0.716056	2.43057	0.015075	0.0466823	TRUE
ABCC3	31.2052	-0.811347	0.324006	-2.50411	0.012276	0.0396667	TRUE
ABCC4	8.22047	0.165247	0.473637	0.348889	0.727173	0.816324	TRUE
ABCC5	55.146	-0.659176	0.285543	-2.3085	0.0209714	0.0606693	TRUE
ABCC6	1.79456	1.27444	0.670295	1.90132	0.0572602	0.130727	TRUE
ABCC8	0.210798	0.342526	0.520932	0.657525	0.510843	NA	TRUE
ABCC9	0.210798	0.342526	0.520932	0.657525	0.510843	NA	TRUE
ABCD1	94.403	-0.539775	0.188248	-2.86736	0.00413911	0.0165065	TRUE
ABCD2	0.728241	-0.122182	0.652823	-0.187159	0.851536	NA	TRUE
ABCD3	21.1242	0.671277	0.310022	2.16526	0.030368	0.0809263	TRUE
ABCD4	9.50469	-0.52936	0.487842	-1.08511	0.277875	0.424669	TRUE
ABCE1	53.2316	-0.592751	0.240893	-2.46064	0.013869	0.0436817	TRUE
ABCF1	215.264	0.363839	0.203712	1.78605	0.0740918	0.15812	TRUE
ABCF2	81.1328	0.504736	0.176657	2.85715	0.0042746	0.0169451	TRUE
ABCF3	132.511	0.297703	0.211216	1.40947	0.158695	0.281974	TRUE
ABCG1	147.771	-1.11797	0.246163	-4.54158	5.58334e-06	6.85582e-05	TRUE
ABCG2	7.20804	-1.32563	0.569586	-2.32736	0.0199464	0.0582117	TRUE
ABCG3	7.77153	-0.785131	0.542807	-1.44643	0.148057	0.267883	FALSE
ABCG3L1	6.04525	-0.380457	0.542035	-0.701904	0.482739	0.619025	FALSE
ABCG3L2	4.48701	-1.26008	0.573516	-2.19712	0.0280117	0.0760487	FALSE
ABCG3L3	4.4762	-0.434777	0.539164	-0.806392	0.420017	0.560556	FALSE
ABCG3L4	11.7053	-1.12678	0.45044	-2.5015	0.0123667	0.0398863	FALSE
ABCG4	5.80328	0.371939	0.522821	0.711407	0.476832	0.614071	TRUE
ABCG5	0.727943	1.1959	0.692928	1.72586	0.0843727	NA	TRUE
ABCG8	0.266517	0.206638	0.524413	0.394038	0.693553	NA	TRUE
ABHD1	22.9324	0.370763	0.369058	1.00462	0.31508	0.459548	TRUE
ABHD10	2.49011	-0.995643	0.704592	-1.41308	0.157633	0.280533	TRUE
ABHD11	28.0805	0.90172	0.330647	2.72714	0.00638861	0.0235522	TRUE
ABHD12	79.9595	0.0361515	0.262079	0.137941	0.890287	0.93207	TRUE
ABHD12B	0	NA	NA	NA	NA	NA	TRUE
ABHD13	28.4324	-0.274104	0.372659	-0.735535	0.462014	0.60028	TRUE
ABHD14A	9.68857	0.0534823	0.479355	0.111571	0.911163	0.945429	TRUE
ABHD14B	10.5193	1.0524	0.604848	1.73993	0.0818706	0.170712	TRUE
ABHD15	2.72216	0.0324427	0.700148	0.0463369	0.963042	0.977705	TRUE
ABHD16A	144.115	0.357646	0.190226	1.88011	0.0600931	0.135455	TRUE
ABHD16B	0	NA	NA	NA	NA	NA	TRUE
ABHD17A	158.421	0.509111	0.237641	2.14235	0.032165	0.0845219	TRUE
ABHD17B	17.9427	-1.05258	0.408949	-2.57388	0.0100566	0.0338968	TRUE
ABHD17C	9.2098	-0.950704	0.459586	-2.06861	0.0385828	0.0969877	TRUE
ABHD2	23.304	-0.41187	0.338637	-1.21626	0.223887	0.363343	TRUE
ABHD3	0.21425	-0.0715627	0.523854	-0.136608	0.891341	NA	TRUE
ABHD4	975.157	-0.129863	0.350868	-0.370119	0.711293	0.805616	TRUE
ABHD5	37.0002	-0.859388	0.290078	-2.96261	0.00305047	0.0128539	TRUE
ABHD6	60.7447	-0.846677	0.253054	-3.34583	0.000820353	0.00440421	TRUE
ABHD8	32.5764	0.760961	0.300155	2.53523	0.0112373	0.0369726	TRUE
ABI1	69.8848	-1.2119	0.363835	-3.3309	0.000865656	0.00459889	TRUE
ABI2	6.24255	0.331854	0.533245	0.622329	0.533726	0.664935	TRUE
ABI3	415.276	-0.312501	0.253973	-1.23045	0.218529	0.356771	TRUE
ABI3BP	0.194114	-0.081195	0.56657	-0.14331	0.886046	NA	TRUE
ABL1	1.79707	-1.66223	0.708517	-2.34606	0.0189728	0.0559158	TRUE
ABL2	8.86162	-0.564329	0.545185	-1.03512	0.300615	0.447874	TRUE
ABLIM1	251.868	0.911886	0.143627	6.34901	2.1671e-10	9.99554e-09	TRUE
ABLIM2	0.943701	0.236096	0.714177	0.330585	0.740958	NA	TRUE
ABLIM3	0.370286	0.501204	0.563252	0.889839	0.373552	NA	TRUE
ABO	0.384204	-0.492663	0.679544	-0.724991	0.468458	NA	FALSE
ABO2	0	NA	NA	NA	NA	NA	FALSE
ABOL1	0	NA	NA	NA	NA	NA	FALSE
ABR	126.185	-1.24811	0.217272	-5.74446	9.22166e-09	2.70671e-07	TRUE
ABRA	0	NA	NA	NA	NA	NA	TRUE
ABRACL	43.5354	-0.252493	0.240183	-1.05125	0.293142	0.440826	TRUE
ABT1	25.3834	-0.10481	0.300424	-0.348872	0.727185	0.816324	TRUE
ABTB1	1979.34	0.588389	0.290829	2.02314	0.0430583	0.105382	TRUE
ABTB2	15.1288	0.387025	0.463004	0.835901	0.403211	0.545003	TRUE
AC1576	4.97994	-2.28566	0.649091	-3.52132	0.000429404	0.00259525	FALSE
ACAA1A	67.7771	0.549015	0.248385	2.21034	0.0270817	0.0741001	FALSE
ACAA1B	10.4795	0.8403	0.410268	2.04817	0.0405432	0.100612	FALSE
ACAA2	164.237	-0.4234	0.306825	-1.37994	0.167606	0.293388	TRUE
ACACA	13.6729	-1.22442	0.429181	-2.85291	0.00433209	0.0171453	TRUE
ACACB	2.25369	0.850077	0.716749	1.18602	0.235616	0.377561	TRUE
ACAD10	13.2445	0.95631	0.392928	2.4338	0.0149412	0.0463497	TRUE
ACAD11	10.4713	0.474209	0.523361	0.906084	0.364891	0.50689	TRUE
ACAD8	16.807	0.412086	0.352198	1.17004	0.241985	0.384923	TRUE
ACAD9	22.2508	-0.136617	0.308812	-0.442395	0.658203	0.766031	TRUE
ACADL	82.3444	0.471944	0.192148	2.45615	0.0140436	0.0440443	TRUE
ACADM	61.1685	-0.100379	0.262907	-0.381805	0.702606	0.799209	TRUE
ACADS	76.9786	0.914638	0.242369	3.77374	0.00016082	0.00114715	TRUE
ACADSB	5.35749	2.26076	0.631886	3.57779	0.00034651	0.00217571	TRUE
ACADVL	125.464	0.751184	0.231623	3.24313	0.00118224	0.00591513	TRUE
ACAN	0	NA	NA	NA	NA	NA	FALSE
ACAP1	867.056	1.11309	0.173615	6.41129	1.44297e-10	7.10998e-09	TRUE
ACAP2	43.2756	-1.58693	0.396886	-3.99844	6.37602e-05	0.000534705	TRUE
ACAP3	76.4718	-0.207205	0.181968	-1.13869	0.254832	0.399353	TRUE
ACAT1	103.453	0.519241	0.236715	2.19352	0.0282698	0.0765656	TRUE
ACAT2	40.1218	0.94867	0.385546	2.46059	0.013871	0.0436817	TRUE
ACBD3	19.9371	-0.8277	0.431194	-1.91955	0.0549145	0.126454	TRUE
ACBD4	105.192	1.62865	0.248258	6.56033	5.36885e-11	3.18214e-09	TRUE
ACBD5	11.6934	-0.482961	0.430501	-1.12186	0.261923	0.406725	TRUE
ACBD6	16.515	0.542559	0.404152	1.34246	0.179446	0.308085	TRUE
ACBD7	6.94185	-0.772736	0.49952	-1.54696	0.121873	0.231788	FALSE
ACCS	10.443	0.366255	0.402643	0.909629	0.363018	0.505432	TRUE
ACCSL	0	NA	NA	NA	NA	NA	TRUE
ACD	122.702	0.896686	0.244962	3.66051	0.000251718	0.00166846	TRUE
ACE	0	NA	NA	NA	NA	NA	TRUE
ACE2	0	NA	NA	NA	NA	NA	TRUE
ACE3	0	NA	NA	NA	NA	NA	FALSE
ACER1	0	NA	NA	NA	NA	NA	TRUE
ACER2	193.395	1.99128	0.410849	4.84673	1.25513e-06	1.91532e-05	TRUE
ACER3	52.8068	-0.919102	0.349659	-2.62857	0.00857456	0.0298698	TRUE
ACHE	6.2814	0.93314	0.474294	1.96743	0.0491339	0.11642	TRUE
ACIN1	258.164	-0.224822	0.151557	-1.48342	0.137964	0.25451	TRUE
ACKR2	0	NA	NA	NA	NA	NA	TRUE
ACKR4	1.30119	-0.0361132	0.712989	-0.0506504	0.959604	0.975668	TRUE
ACLY	120.875	-0.265301	0.190067	-1.39583	0.162766	0.287335	TRUE
ACMSD	0	NA	NA	NA	NA	NA	TRUE
ACN9	0.535474	0.280146	0.679145	0.412498	0.679974	NA	TRUE
ACNAT1	0.529774	0.682773	0.59604	1.14552	0.251995	NA	FALSE
ACNAT2	1.11642	0.685984	0.575462	1.19206	0.233239	0.374605	FALSE
ACO1	30.5698	-0.381138	0.267787	-1.42329	0.154653	0.276876	TRUE
ACO2	215.626	0.187956	0.151672	1.23922	0.215263	0.3528	TRUE
ACOT1	0.186391	-0.0143747	0.523178	-0.0274757	0.97808	NA	FALSE
ACOT11	0.800526	-0.706095	0.622368	-1.13453	0.256573	NA	TRUE
ACOT12	0.529774	0.682773	0.59604	1.14552	0.251995	NA	TRUE
ACOT13	11.3027	1.21401	0.514899	2.35777	0.018385	0.0546432	TRUE
ACOT2	3.8763	-0.285377	0.609619	-0.468124	0.639696	0.751676	TRUE
ACOT3	8.97489	0.769539	0.434419	1.77142	0.0764908	0.162103	FALSE
ACOT4	0.210798	0.342526	0.520932	0.657525	0.510843	NA	TRUE
ACOT5	0.762322	0.768752	0.659599	1.16548	0.243824	NA	FALSE
ACOT6	0.0278593	0.183262	0.520802	0.351885	0.724925	NA	FALSE
ACOT7	225.023	0.167602	0.169939	0.98625	0.324011	0.468728	FALSE
ACOT8	34.2737	0.516596	0.345809	1.49388	0.135208	0.250819	TRUE
ACOT9	38.3177	-0.596953	0.235625	-2.53348	0.0112936	0.0371078	TRUE
ACOX1	18.1259	-0.40155	0.636906	-0.630469	0.528388	0.659868	TRUE
ACOX2	6.40305	0.562759	0.547282	1.02828	0.303819	0.450677	TRUE
ACOX3	12.2486	-1.34754	0.517332	-2.60478	0.00919335	0.0315078	TRUE
ACOXL	0.0278593	0.183262	0.520802	0.351885	0.724925	NA	TRUE
ACP1	5.59947	-1.27036	0.578909	-2.1944	0.0282069	0.0764796	TRUE
ACP2	44.3346	-1.17413	0.287573	-4.08289	4.44799e-05	0.000396026	TRUE
ACP5	295.956	1.16552	0.238218	4.89265	9.94849e-07	1.57089e-05	TRUE
ACP6	37.5253	1.60815	0.354121	4.54124	5.59253e-06	6.85582e-05	TRUE
ACPL2	23.939	0.193427	0.29765	0.649847	0.515791	0.648585	TRUE
ACPP	2.87529	-2.14761	0.699481	-3.07028	0.00213855	0.0096605	TRUE
ACPT	2.37844	0.784746	0.656145	1.196	0.231698	0.372765	FALSE
ACR	0.0931953	0.13196	0.521515	0.253032	0.800243	NA	TRUE
ACRBP	24.3049	0.739652	0.301515	2.45312	0.0141623	0.0443259	TRUE
ACRV1	0	NA	NA	NA	NA	NA	TRUE
ACSBG1	4.22342	-1.12123	0.647567	-1.73145	0.0833717	0.173077	TRUE
ACSBG2	0	NA	NA	NA	NA	NA	FALSE
ACSF2	23.5147	0.363949	0.286864	1.26872	0.204543	0.33948	TRUE
ACSF3	35.3006	0.621577	0.29701	2.09279	0.0363683	0.0924808	TRUE
ACSL1	119.36	0.245753	0.286279	0.858436	0.390652	0.532131	TRUE
ACSL3	4.73872	-0.159089	0.569377	-0.279409	0.779931	0.854918	TRUE
ACSL4	14.79	-0.777174	0.46509	-1.67102	0.0947177	0.19082	TRUE
ACSL5	194.596	-0.367595	0.157934	-2.32752	0.0199378	0.0582114	TRUE
ACSL6	0	NA	NA	NA	NA	NA	TRUE
ACSM1	8.12978	0.387278	0.574761	0.673807	0.500434	0.634546	TRUE
ACSM2A	0	NA	NA	NA	NA	NA	TRUE
ACSM3	0.471205	0.451945	0.677194	0.667378	0.50453	NA	TRUE
ACSM4	0	NA	NA	NA	NA	NA	TRUE
ACSM5	0.581085	0.701887	0.601318	1.16725	0.24311	NA	TRUE
ACSS1	45.4086	0.153612	0.289024	0.531484	0.595084	0.716003	TRUE
ACSS2	37.7502	-0.598965	0.331717	-1.80565	0.0709735	0.153332	TRUE
ACSS3	1.77571	0.984097	0.694029	1.41795	0.156206	0.2786	TRUE
ACTA1	0.644719	0.402358	0.648668	0.620283	0.535071	NA	TRUE
ACTA2	0.370286	0.501204	0.563252	0.889839	0.373552	NA	TRUE
ACTB	10560	0.729262	0.129951	5.61183	2.00198e-08	5.38647e-07	TRUE
ACTBL2	0	NA	NA	NA	NA	NA	FALSE
ACTC1	0	NA	NA	NA	NA	NA	TRUE
ACTG1	11.568	-0.207668	0.490568	-0.423321	0.672061	0.77632	FALSE
ACTG2	0.0730593	0.0833984	0.522124	0.159729	0.873094	NA	TRUE
ACTL10	0.922008	-0.182474	0.694447	-0.262761	0.792735	NA	FALSE
ACTL11	0	NA	NA	NA	NA	NA	FALSE
ACTL6A	36.1572	-0.0773127	0.308806	-0.25036	0.802309	0.871417	TRUE
ACTL6B	0	NA	NA	NA	NA	NA	TRUE
ACTL7A	0.329797	0.407511	0.522269	0.780271	0.435232	NA	TRUE
ACTL7B	0.401049	-0.00949819	0.630949	-0.0150538	0.987989	NA	FALSE
ACTL9	0	NA	NA	NA	NA	NA	FALSE
ACTL9B	0	NA	NA	NA	NA	NA	FALSE
ACTN1	42.8458	-0.136128	0.40162	-0.338948	0.734649	0.821763	FALSE
ACTN2	4.23048	-0.0459467	0.716394	-0.0641362	0.948862	0.968964	TRUE
ACTN3	1.64013	-0.177402	0.711746	-0.249249	0.803168	0.872066	FALSE
ACTN4	236.719	0.257745	0.140157	1.83898	0.0659188	0.144921	TRUE
ACTR10	123.936	0.759595	0.215251	3.52889	0.000417314	0.00253592	TRUE
ACTR1A	410.831	0.498401	0.151344	3.29317	0.000990661	0.00513061	TRUE
ACTR1B	60.9138	0.161136	0.212361	0.758783	0.447982	0.587211	TRUE
ACTR2	384.689	-1.23375	0.232796	-5.29968	1.16006e-07	2.46669e-06	TRUE
ACTR3	483.528	-1.19825	0.248885	-4.81447	1.47589e-06	2.21096e-05	TRUE
ACTR3B	1.838	-2.06106	0.713629	-2.88814	0.00387522	0.0156759	TRUE
ACTR5	23.7501	0.035356	0.311958	0.113336	0.909765	0.944403	TRUE
ACTR6	5.11376	-1.45964	0.590415	-2.47223	0.0134274	0.0425357	TRUE
ACTR8	37.5678	0.0519311	0.314499	0.165123	0.868847	0.917216	TRUE
ACTRT1	0	NA	NA	NA	NA	NA	FALSE
ACTRT2	0	NA	NA	NA	NA	NA	TRUE
ACTRT3	0.0730593	0.0833984	0.522124	0.159729	0.873094	NA	FALSE
ACVR1	0.749497	-0.901813	0.684492	-1.31749	0.187673	NA	TRUE
ACVR1B	2.8126	-0.527118	0.649743	-0.811272	0.41721	0.55784	TRUE
ACVR1C	0.252683	0.196628	0.522743	0.376146	0.706808	NA	TRUE
ACVR2A	1.55159	-1.90632	0.715053	-2.66598	0.00767637	0.0272752	TRUE
ACVR2B	1.37236	-0.167383	0.716724	-0.233539	0.815343	0.879965	TRUE
ACVRL1	32.0226	-0.258974	0.348699	-0.742687	0.457671	0.596027	TRUE
ACY1	43.1587	1.58693	0.317857	4.99259	5.95747e-07	1.02227e-05	TRUE
ACY3	10.2578	-0.252337	0.527798	-0.478093	0.632584	0.746647	TRUE
ACYP1	7.88567	0.565828	0.443047	1.27713	0.201557	0.335741	TRUE
ACYP2	0.100919	0.0341722	0.522682	0.0653787	0.947873	NA	TRUE
ADA	76.5619	0.51784	0.455676	1.13642	0.255781	0.400403	TRUE
ADAD1	0	NA	NA	NA	NA	NA	TRUE
ADAD2	0	NA	NA	NA	NA	NA	TRUE
ADAL	4.16039	-0.579195	0.636478	-0.910001	0.362822	0.505217	TRUE
ADAM10	46.3661	-0.380957	0.419626	-0.907849	0.363958	0.506192	TRUE
ADAM11	1.42488	-1.37322	0.712514	-1.92729	0.0539432	0.124933	TRUE
ADAM12	1.02843	0.306597	0.715722	0.428375	0.668378	NA	TRUE
ADAM15	98.5174	-0.253807	0.193461	-1.31193	0.189545	0.320871	TRUE
ADAM17	88.3177	-1.47574	0.258122	-5.71721	1.08286e-08	3.117e-07	TRUE
ADAM18	0	NA	NA	NA	NA	NA	TRUE
ADAM19	116.472	0.128972	0.325959	0.39567	0.692349	0.791873	TRUE
ADAM1A	3.25503	-0.307753	0.685663	-0.448841	0.653547	0.762419	FALSE
ADAM2	0	NA	NA	NA	NA	NA	TRUE
ADAM20	0	NA	NA	NA	NA	NA	FALSE
ADAM22	1.11348	-0.521221	0.716351	-0.727606	0.466855	0.604487	TRUE
ADAM23	0.707322	0.000979306	0.676278	0.00144808	0.998845	NA	TRUE
ADAM24	0	NA	NA	NA	NA	NA	FALSE
ADAM26A	0	NA	NA	NA	NA	NA	FALSE
ADAM28	0.111437	0.0151675	0.522882	0.0290075	0.976859	NA	TRUE
ADAM30	0.748003	0.471883	0.68619	0.687685	0.491651	NA	TRUE
ADAM32	0	NA	NA	NA	NA	NA	TRUE
ADAM33	0	NA	NA	NA	NA	NA	TRUE
ADAM34	0	NA	NA	NA	NA	NA	FALSE
ADAM34L	0	NA	NA	NA	NA	NA	FALSE
ADAM3A	0	NA	NA	NA	NA	NA	FALSE
ADAM4	0.365467	0.0972265	0.6166	0.157682	0.874708	NA	FALSE
ADAM4L1	0.247451	0.342526	0.520932	0.657525	0.510843	NA	FALSE
ADAM5	0	NA	NA	NA	NA	NA	FALSE
ADAM6	0.813661	-0.755822	0.715926	-1.05573	0.291093	NA	FALSE
ADAM7	0	NA	NA	NA	NA	NA	FALSE
ADAM8	102.842	-1.09702	0.25733	-4.26306	2.01642e-05	0.000205477	TRUE
ADAM9	6.67305	-0.795556	0.650162	-1.22363	0.221093	0.359807	TRUE
ADAMDEC1	0	NA	NA	NA	NA	NA	TRUE
ADAMTS1	0.0730593	0.0833984	0.522124	0.159729	0.873094	NA	TRUE
ADAMTS10	50.7385	0.024265	0.292995	0.0828172	0.933997	0.960929	TRUE
ADAMTS12	1.22038	-0.740989	0.716608	-1.03402	0.301126	0.448526	TRUE
ADAMTS14	52.2041	-0.981316	0.364022	-2.69576	0.00702292	0.0253722	TRUE
ADAMTS15	0	NA	NA	NA	NA	NA	TRUE
ADAMTS16	0	NA	NA	NA	NA	NA	TRUE
ADAMTS17	0.0557186	0.114828	0.521737	0.220088	0.825803	NA	TRUE
ADAMTS18	0.0730593	0.0833984	0.522124	0.159729	0.873094	NA	TRUE
ADAMTS19	0	NA	NA	NA	NA	NA	TRUE
ADAMTS2	0.857377	0.0767141	0.712201	0.107714	0.914223	NA	TRUE
ADAMTS20	0	NA	NA	NA	NA	NA	TRUE
ADAMTS3	3.88432	1.20778	0.630455	1.91572	0.0554005	0.12731	TRUE
ADAMTS4	0	NA	NA	NA	NA	NA	TRUE
ADAMTS5	0	NA	NA	NA	NA	NA	TRUE
ADAMTS6	1.47605	-0.0734422	0.695038	-0.105666	0.915847	0.94863	TRUE
ADAMTS7	1.29354	-0.0459384	0.698435	-0.0657733	0.947558	0.968897	TRUE
ADAMTS8	0	NA	NA	NA	NA	NA	FALSE
ADAMTS9	0	NA	NA	NA	NA	NA	TRUE
ADAMTSL1	0.361443	0.0776237	0.547426	0.141798	0.88724	NA	TRUE
ADAMTSL2	0	NA	NA	NA	NA	NA	TRUE
ADAMTSL3	0.210798	0.342526	0.520932	0.657525	0.510843	NA	TRUE
ADAMTSL4	3.47628	-0.112885	0.599203	-0.188392	0.85057	0.906206	TRUE
ADAMTSL5	0.176773	-0.0421375	0.523439	-0.0805012	0.935839	NA	TRUE
ADAP1	70.3554	-0.772943	0.21353	-3.61983	0.000294799	0.00190263	TRUE
ADAP2	3.1864	0.441794	0.67547	0.654054	0.513077	0.646195	TRUE
ADAR	121.74	-1.13935	0.269915	-4.22114	2.43069e-05	0.000239728	TRUE
ADARB1	9.43601	0.643604	0.447585	1.43795	0.150449	0.271449	TRUE
ADARB2	0.556869	0.785739	0.650103	1.20864	0.226802	NA	TRUE
ADAT1	3.88764	0.313467	0.60948	0.514319	0.607029	0.725537	TRUE
ADAT2	7.58482	-0.0905436	0.498037	-0.181801	0.855739	0.908838	TRUE
ADAT3	18.8305	1.53611	0.35894	4.27957	1.87252e-05	0.000192896	TRUE
ADC	0	NA	NA	NA	NA	NA	TRUE
ADCK1	3.64289	-0.672505	0.614189	-1.09495	0.27354	0.41998	TRUE
ADCK2	21.4177	0.381286	0.301028	1.26661	0.205294	0.340439	TRUE
ADCK3	38.3225	0.47067	0.25294	1.86079	0.0627733	0.139776	TRUE
ADCK4	47.2769	1.07107	0.273856	3.91108	9.18837e-05	0.000722642	TRUE
ADCK5	207.984	0.900949	0.271775	3.31505	0.000916264	0.00482267	TRUE
ADCY1	1.7478	0.940395	0.716574	1.31235	0.189402	0.32087	TRUE
ADCY10	0.643402	-0.371658	0.695099	-0.534684	0.592868	NA	TRUE
ADCY2	0	NA	NA	NA	NA	NA	FALSE
ADCY3	22.07	1.24564	0.321062	3.87976	0.00010456	0.000802792	TRUE
ADCY4	24.9295	-0.155726	0.376217	-0.413927	0.678928	0.781479	TRUE
ADCY5	7.62219	0.670236	0.552951	1.21211	0.225471	0.365479	TRUE
ADCY6	16.768	2.14064	0.422162	5.07067	3.96422e-07	7.24845e-06	TRUE
ADCY7	53.1038	-2.21845	0.431232	-5.14444	2.68319e-07	5.11976e-06	TRUE
ADCY8	0	NA	NA	NA	NA	NA	TRUE
ADCYAP1	0	NA	NA	NA	NA	NA	TRUE
ADCYAP1R1	0	NA	NA	NA	NA	NA	TRUE
ADD1	595.941	0.300921	0.131622	2.28625	0.0222394	0.0635581	TRUE
ADD2	2505.94	0.255164	0.311145	0.82008	0.41217	0.553576	TRUE
ADD3	164.726	-0.517121	0.276952	-1.86719	0.0618757	0.13843	TRUE
ADGB	6.62136	-2.27175	0.567381	-4.00392	6.23023e-05	0.000524036	TRUE
ADH1	22.4865	0.269235	0.686206	0.392353	0.694797	0.793786	FALSE
ADH4	0.632395	0.478585	0.5262	0.909511	0.36308	NA	FALSE
ADH5	85.2393	0.88073	0.220678	3.99101	6.57918e-05	0.000550238	TRUE
ADH6	0.283858	0.17978	0.526736	0.34131	0.73287	NA	FALSE
ADH6A	0	NA	NA	NA	NA	NA	FALSE
ADH7	0.210798	0.342526	0.520932	0.657525	0.510843	NA	FALSE
ADHFE1	2.31798	1.4666	0.714757	2.05188	0.0401812	0.100017	TRUE
ADI1	20.0497	0.318733	0.330036	0.965753	0.334168	0.478346	TRUE
ADIG	0	NA	NA	NA	NA	NA	FALSE
ADIPOQ	0.238658	0.264405	0.521969	0.506552	0.612469	NA	TRUE
ADIPOR1	4900.24	0.395723	0.287835	1.37483	0.169185	0.295647	TRUE
ADIPOR2	297.695	-0.439321	0.181442	-2.42128	0.0154662	0.0475575	TRUE
ADK	80.8618	1.42105	0.231964	6.1262	9.00039e-10	3.63243e-08	TRUE
ADM	0.159488	0.342526	0.520932	0.657525	0.510843	NA	FALSE
ADM2	0.303994	0.216172	0.5407	0.399801	0.689303	NA	TRUE
ADNP	82.0424	-0.489165	0.212772	-2.299	0.0215047	0.0618185	FALSE
ADNP2	12.5893	-0.971968	0.478753	-2.03021	0.0423355	0.1041	TRUE
ADO	2.62072	-0.282183	0.62555	-0.451097	0.65192	0.760811	TRUE
ADORA1	0.232547	0.17667	0.522951	0.337833	0.735489	NA	TRUE
ADORA2A	79.3914	-1.42388	0.280496	-5.07629	3.84873e-07	7.07305e-06	TRUE
ADORA2B	1.88641	-1.73066	0.70193	-2.46558	0.0136794	0.0431556	TRUE
ADORA3	0	NA	NA	NA	NA	NA	TRUE
ADPGK	29.7905	-0.763282	0.280932	-2.71696	0.0065885	0.0241441	TRUE
ADPRH	76.0054	0.329535	0.239013	1.37873	0.167978	0.293872	TRUE
ADPRHL1	0.68951	0.585201	0.689327	0.848945	0.395912	NA	TRUE
ADPRHL2	56.2157	0.50593	0.241324	2.09648	0.0360398	0.0918705	TRUE
ADPRM	56.8772	0.274109	0.201729	1.3588	0.174211	0.301637	TRUE
ADRA1A	0	NA	NA	NA	NA	NA	TRUE
ADRA1B	0.159488	0.342526	0.520932	0.657525	0.510843	NA	FALSE
ADRA1D	0	NA	NA	NA	NA	NA	TRUE
ADRA2A	0.430413	0.24295	0.564714	0.430217	0.667038	NA	TRUE
ADRA2B	0	NA	NA	NA	NA	NA	TRUE
ADRA2C	0	NA	NA	NA	NA	NA	FALSE
ADRB1	0.358474	-0.274484	0.553532	-0.495877	0.619981	NA	TRUE
ADRB2	37.1282	-2.09936	0.349809	-6.00145	1.95569e-09	7.11997e-08	FALSE
ADRB3	0	NA	NA	NA	NA	NA	TRUE
ADRBK1	667.434	-0.192289	0.117065	-1.64259	0.100469	0.199943	TRUE
ADRBK2	4.66666	-1.44441	0.645381	-2.23808	0.0252159	0.0700735	TRUE
ADRM1	293	1.00887	0.241808	4.17218	3.01699e-05	0.000288958	TRUE
ADSL	89.0363	0.538176	0.220059	2.4456	0.0144612	0.0451348	TRUE
ADSS	53.8259	-0.954578	0.260381	-3.66608	0.000246295	0.00163871	TRUE
ADSSL1	21.4401	-0.498916	0.338234	-1.47506	0.140196	0.25765	TRUE
ADTRP	2.16162	0.760464	0.715755	1.06246	0.288025	0.434659	TRUE
AEBP1	1.87807	1.16027	0.679741	1.70693	0.0878344	0.179978	TRUE
AEBP2	24.6172	-0.41541	0.431334	-0.963081	0.335507	0.479815	FALSE
AEN	110.742	1.77451	0.189027	9.38761	6.13786e-21	3.27415e-18	TRUE
AES	6649.07	1.78886	0.329488	5.4292	5.66069e-08	1.32288e-06	TRUE
AFAP1	0.0931953	0.13196	0.521515	0.253032	0.800243	NA	TRUE
AFAP1L1	1.15122	-1.07129	0.71675	-1.49465	0.135006	0.250589	TRUE
AFAP1L2	0	NA	NA	NA	NA	NA	TRUE
AFF1	71.0399	0.123381	0.215907	0.571451	0.567694	0.693798	TRUE
AFF2	0	NA	NA	NA	NA	NA	TRUE
AFF3	42.0216	0.74242	0.274907	2.70062	0.00692103	0.025078	TRUE
AFF4	25.161	-0.286481	0.392077	-0.730676	0.464977	0.602726	TRUE
AFG3L1	68.3382	0.844432	0.263815	3.20085	0.00137024	0.0066396	FALSE
AFG3L2	40.9119	-0.63924	0.245784	-2.60082	0.00930021	0.0317839	TRUE
AFM	11.0171	0.565665	0.548686	1.03094	0.302567	0.449845	FALSE
AFMID	30.1247	-1.24192	0.419249	-2.96224	0.0030541	0.0128589	TRUE
AFP	0	NA	NA	NA	NA	NA	TRUE
AFTPH	77.1442	-1.02208	0.258797	-3.94934	7.83684e-05	0.000633401	TRUE
AGA	33.1001	-0.338235	0.282473	-1.1974	0.231149	0.372126	TRUE
AGAP1	76.9524	0.0344866	0.215178	0.16027	0.872668	0.919636	TRUE
AGAP2	103.789	-0.207544	0.189413	-1.09572	0.2732	0.419721	TRUE
AGAP3	85.36	-0.219056	0.208497	-1.05064	0.293422	0.440901	TRUE
AGBL1	0	NA	NA	NA	NA	NA	TRUE
AGBL2	0.355849	0.0772814	0.62557	0.123537	0.901682	NA	FALSE
AGBL3	0.128778	-0.00749348	0.523111	-0.0143248	0.988571	NA	TRUE
AGBL4	0.440495	-0.0622485	0.63932	-0.0973667	0.922435	NA	TRUE
AGBL5	8.46149	0.268977	0.468578	0.574028	0.565949	0.692355	TRUE
AGER	20.1151	1.42459	0.467476	3.04742	0.00230818	0.0102754	TRUE
AGFG1	51.5791	-0.855597	0.233195	-3.66902	0.000243484	0.00162619	TRUE
AGFG2	44.9024	-0.316989	0.236048	-1.34291	0.179303	0.307923	TRUE
AGGF1	29.5884	-1.5005	0.407287	-3.68413	0.000229489	0.00154449	TRUE
AGK	12.9839	-0.102393	0.423269	-0.241911	0.808849	0.876426	TRUE
AGL	31.3093	-1.83534	0.354067	-5.1836	2.17647e-07	4.31392e-06	TRUE
AGMAT	2.75128	1.51362	0.715707	2.11486	0.0344423	0.0889252	TRUE
AGMO	1.43539	0.759287	0.593916	1.27844	NA	NA	FALSE
AGO2	857.77	0.688463	0.328248	2.09739	0.0359591	0.0917209	TRUE
AGO3	1.14803	-0.660329	0.712102	-0.927295	0.353773	0.496561	TRUE
AGO4	26.0925	-1.0152	0.418028	-2.42854	0.0151599	0.0468624	TRUE
AGPAT1	117.258	0.467982	0.216511	2.16147	0.0306591	0.081578	TRUE
AGPAT2	34.5322	-0.0310877	0.260621	-0.119283	0.905051	0.942137	TRUE
AGPAT3	37.6853	0.71871	0.322623	2.22771	0.0259	0.0715852	TRUE
AGPAT4	85.4086	-1.1564	0.238258	-4.85355	1.21272e-06	1.86453e-05	TRUE
AGPAT5	29.9819	0.547342	0.277792	1.97033	0.0488005	0.115854	TRUE
AGPAT6	57.5939	0.123225	0.254129	0.484891	0.627754	0.742424	TRUE
AGPAT9	2.93106	-2.20188	0.700093	-3.14513	0.00166016	0.00780105	TRUE
AGPS	3.52615	-0.474342	0.691264	-0.686195	0.49259	0.628164	TRUE
AGR2	0	NA	NA	NA	NA	NA	TRUE
AGR3	0	NA	NA	NA	NA	NA	FALSE
AGRN	29.1111	-1.55235	0.407967	-3.80509	0.000141755	0.00103292	TRUE
AGRP	39.184	2.39854	0.40179	5.96963	2.37799e-09	8.2885e-08	TRUE
AGT	6.78114	1.82505	0.712923	2.55996	0.0104685	0.0350635	FALSE
AGTPBP1	5.33426	-0.590045	0.607278	-0.971622	0.331238	0.475609	TRUE
AGTR1A	1.53246	1.25663	0.667937	1.88136	0.0599233	0.135147	FALSE
AGTR1B	0	NA	NA	NA	NA	NA	FALSE
AGTR2	0	NA	NA	NA	NA	NA	FALSE
AGTRAP	39.1745	0.213892	0.287261	0.744589	0.45652	0.594844	TRUE
AGXT	1.95961	1.38788	0.680619	2.03915	0.0414352	0.10232	TRUE
AGXT2	3.17865	0.555892	0.543926	1.022	0.306782	0.452338	TRUE
AHCTF1	30.5015	-1.18291	0.369095	-3.2049	0.00135108	0.00656751	TRUE
AHCY	89.5933	0.06566	0.282997	0.232016	0.816525	0.880968	FALSE
AHCYL1	70.0149	-0.389657	0.206365	-1.88819	0.0590001	0.133569	TRUE
AHCYL2	17.78	-0.74644	0.360323	-2.07158	0.0383043	0.0963814	TRUE
AHDC1	16.1326	-0.644934	0.38602	-1.67073	0.0947759	0.190905	TRUE
AHI1	50.8746	1.02357	0.256188	3.9954	6.45852e-05	0.000540516	TRUE
AHNAK	494.982	-0.581363	0.172679	-3.36672	0.000760687	0.00414426	TRUE
AHNAK2	2.78193	0.693577	0.643702	1.07748	0.281265	0.428198	TRUE
AHR	2.36976	-0.898486	0.664284	-1.35256	0.176195	0.303913	TRUE
AHRR	1.583	1.6961	0.699938	2.42322	0.0153837	0.0473514	TRUE
AHSA1	280.775	0.806118	0.198419	4.0627	4.8508e-05	0.000426599	TRUE
AHSA2	19.1302	-0.174467	0.362169	-0.481729	0.629999	0.744147	TRUE
AHSG	83.9728	0.552614	0.550388	1.00404	0.315357	0.459679	TRUE
AHSP	1624.87	-0.0528716	0.529645	-0.0998245	0.920484	0.951585	TRUE
AICDA	0	NA	NA	NA	NA	NA	TRUE
AIDA	53.9942	-0.336719	0.228087	-1.47627	0.139871	0.257206	TRUE
AIF1	265.694	-0.429488	0.241162	-1.78091	0.0749266	0.159541	TRUE
AIF1L	2.16177	-0.793573	0.687095	-1.15497	0.248103	0.391751	TRUE
AIFM1	67.761	0.815577	0.204446	3.9892	6.62971e-05	0.000552957	TRUE
AIFM2	6.83613	0.287469	0.506435	0.567632	0.570285	0.696132	TRUE
AIFM3	2.89857	-0.257774	0.662743	-0.38895	0.697313	0.795675	TRUE
AIG1	18.7966	0.569342	0.367896	1.54756	0.121728	0.231726	TRUE
AIM1	129.956	-1.05162	0.183682	-5.72521	1.03309e-08	2.98938e-07	TRUE
AIM1L	4.94886	-1.82409	0.616856	-2.95708	0.00310572	0.0130493	TRUE
AIM2	15.0308	-1.0638	0.499023	-2.13176	0.0330269	0.0862878	TRUE
AIMP1	106.622	0.875458	0.28021	3.12429	0.00178235	0.0082832	TRUE
AIMP2	81.0933	0.957353	0.319453	2.99685	0.00272782	0.0117513	TRUE
AIP	174.109	0.770586	0.265217	2.90549	0.00366675	0.0149361	TRUE
AIPL1	0	NA	NA	NA	NA	NA	TRUE
AIRE	0	NA	NA	NA	NA	NA	TRUE
AJAP1	0	NA	NA	NA	NA	NA	TRUE
AJUBA	0.370286	0.501204	0.563252	0.889839	0.373552	NA	TRUE
AK1	0.673456	0.845456	0.68756	1.22965	0.218829	NA	TRUE
AK2	44.2555	0.0334617	0.287646	0.11633	0.907391	0.943098	TRUE
AK3	41.1509	1.36765	0.252771	5.41064	6.27997e-08	1.45102e-06	TRUE
AK4	10.1723	-0.639779	0.598669	-1.06867	0.285219	0.432499	TRUE
AK5	0	NA	NA	NA	NA	NA	TRUE
AK6	17.0035	-0.858743	0.34916	-2.45946	0.0139147	0.0437967	FALSE
AK7	0.560377	0.273273	0.677429	0.403398	0.686656	NA	TRUE
AK8	0.162231	-0.0143747	0.523178	-0.0274757	0.97808	NA	TRUE
AKAP1	4.42602	-1.31694	0.643409	-2.04682	0.0406762	0.100876	TRUE
AKAP10	21.6752	-1.51048	0.452442	-3.3385	0.000842319	0.00449909	TRUE
AKAP11	12.2599	-0.560108	0.42939	-1.30443	0.192088	0.324083	TRUE
AKAP12	3.29305	-0.524545	0.653506	-0.802663	0.422169	0.562385	TRUE
AKAP13	175.451	-0.979604	0.224449	-4.36448	1.27424e-05	0.000138351	TRUE
AKAP14	0.0278593	0.183262	0.520802	0.351885	0.724925	NA	TRUE
AKAP17A	194.51	0.216503	0.165253	1.31013	0.190153	0.321569	TRUE
AKAP17B	16.259	-0.327081	0.365503	-0.894881	0.370851	0.512353	FALSE
AKAP2	12.3999	0.51415	0.433196	1.18688	0.235276	0.377136	TRUE
AKAP3	0.0835778	0.0604541	0.522391	0.115726	0.90787	NA	TRUE
AKAP4	0	NA	NA	NA	NA	NA	TRUE
AKAP5	0.121055	0.0596032	0.522401	0.114095	0.909163	NA	TRUE
AKAP6	0.336209	-0.323537	0.616907	-0.524449	0.599966	NA	TRUE
AKAP7	1.52678	-0.21386	0.708492	-0.301852	0.762765	0.842488	TRUE
AKAP8	147.005	-0.102475	0.162244	-0.63161	0.527641	0.659162	TRUE
AKAP8L	120.103	0.182304	0.202968	0.898189	0.369085	0.510581	TRUE
AKAP9	33.7084	-0.358512	0.270923	-1.3233	0.185737	0.31672	TRUE
AKD2	0	NA	NA	NA	NA	NA	FALSE
AKIP1	20.3473	0.522329	0.318478	1.64008	0.100989	0.20075	TRUE
AKIRIN1	48.6855	-1.06255	0.328642	-3.23315	0.00122434	0.00607169	FALSE
AKIRIN2	38.0924	-0.797135	0.364144	-2.18906	0.0285922	0.0772357	TRUE
AKNA	407.449	-0.90873	0.207624	-4.3768	1.20437e-05	0.000132168	TRUE
AKNAD1	0.0278593	0.183262	0.520802	0.351885	0.724925	NA	TRUE
AKP3	0	NA	NA	NA	NA	NA	FALSE
AKR1A1	560.882	0.817204	0.191369	4.27031	1.95197e-05	0.000200073	TRUE
AKR1B1	229.457	0.622832	0.205106	3.03664	0.0023923	0.010577	TRUE
AKR1B10	0.0278593	0.183262	0.520802	0.351885	0.724925	NA	TRUE
AKR1B7	0.581085	0.701887	0.601318	1.16725	0.24311	NA	FALSE
AKR1B8	69.2807	-0.105575	0.355797	-0.296728	0.766674	0.845391	FALSE
AKR1C1	1.05955	1.08488	0.64655	1.67796	0.0933558	NA	TRUE
AKR1C12	0	NA	NA	NA	NA	NA	FALSE
AKR1C12L1	0	NA	NA	NA	NA	NA	FALSE
AKR1C13	3.86791	0.558303	0.545111	1.0242	0.305741	0.451617	FALSE
AKR1C14	14.5261	1.31812	0.523906	2.51595	0.0118713	0.0386746	FALSE
AKR1C19	0.398146	0.57701	0.629686	0.916346	0.359485	NA	FALSE
AKR1C2	0.529774	0.682773	0.59604	1.14552	0.251995	NA	TRUE
AKR1C3	0.422993	0.331962	0.570097	0.582291	0.560371	NA	FALSE
AKR1CL	0.186391	-0.0143747	0.523178	-0.0274757	0.97808	NA	FALSE
AKR1D1	16.6406	3.24399	0.661585	4.90336	9.42106e-07	1.49337e-05	TRUE
AKR1E2	2.57302	0.564946	0.65551	0.861842	0.388775	0.530222	TRUE
AKR7A2	75.4458	2.12005	0.286076	7.41081	1.25532e-13	1.62212e-11	TRUE
AKR7A3	609.769	1.63699	0.316666	5.16947	2.34762e-07	4.59377e-06	FALSE
AKT1	309.327	-0.664736	0.143241	-4.6407	3.4723e-06	4.52082e-05	TRUE
AKT1S1	39.152	0.801122	0.243633	3.28823	0.0010082	0.00521046	TRUE
AKT2	549.485	0.0614415	0.232099	0.264721	0.791224	0.863122	TRUE
AKT3	27.3158	1.07185	0.343157	3.12349	0.00178721	0.00830264	TRUE
AKTIP	20.0914	0.491741	0.424366	1.15877	0.246551	0.390295	TRUE
ALAD	141.454	0.284957	0.351216	0.811345	0.417168	0.55784	TRUE
ALAS1	50.5344	-0.612604	0.28651	-2.13816	0.0325039	0.0851388	FALSE
ALAS2	147501	1.17305	0.321983	3.64321	0.000269261	0.00176661	TRUE
ALB	1146.47	0.538072	0.550624	0.977203	0.328469	0.473337	TRUE
ALCAM	10.6187	0.341187	0.495045	0.689204	0.490695	0.626335	TRUE
ALDH16A1	144.872	0.351808	0.206072	1.70721	0.0877832	0.179952	TRUE
ALDH18A1	45.2325	0.327459	0.266045	1.23084	0.218383	0.356668	TRUE
ALDH1A1	1.89258	0.561757	0.703431	0.798596	0.424525	0.564239	TRUE
ALDH1A2	0	NA	NA	NA	NA	NA	TRUE
ALDH1A3	0.159488	0.342526	0.520932	0.657525	0.510843	NA	TRUE
ALDH1A7	0	NA	NA	NA	NA	NA	FALSE
ALDH1B1	0.159488	0.342526	0.520932	0.657525	0.510843	NA	FALSE
ALDH1L1	6.10187	0.913248	0.646838	1.41187	0.157989	0.281005	TRUE
ALDH1L2	1.69194	1.31644	0.674031	1.95309	0.0508092	0.119604	TRUE
ALDH2	1006.12	0.76544	0.283218	2.70266	0.0068788	0.0249328	TRUE
ALDH3A1	0.322892	-0.319816	0.62003	-0.515807	0.605989	NA	TRUE
ALDH3A2	65.1414	-0.802292	0.249269	-3.21858	0.00128826	0.00632478	TRUE
ALDH3B1	59.8832	-0.254254	0.283365	-0.897269	0.369576	0.510967	TRUE
ALDH3B2	0	NA	NA	NA	NA	NA	FALSE
ALDH4A1	37.1263	0.0193527	0.308842	0.0626621	0.950036	0.969635	TRUE
ALDH5A1	5.12208	0.950923	0.516141	1.84237	0.0654207	0.14405	TRUE
ALDH6A1	24.4973	1.41053	0.713175	1.97781	0.0479499	0.114499	TRUE
ALDH7A1	11.6549	1.14891	0.47993	2.39392	0.0166693	0.0505037	TRUE
ALDH8A1	2.56645	1.2267	0.712529	1.72162	0.0851388	0.175713	TRUE
ALDH9A1	51.2565	-0.0101028	0.288009	-0.0350779	0.972018	0.98321	FALSE
ALDOA	2510.78	0.837088	0.248895	3.36323	0.000770374	0.00418348	TRUE
ALDOART2	0	NA	NA	NA	NA	NA	FALSE
ALDOB	20.2502	0.57664	0.566232	1.01838	0.308497	0.453111	TRUE
ALDOC	5.21777	0.38588	0.526706	0.732629	0.463785	0.601987	TRUE
ALG1	6.4727	-0.775042	0.490175	-1.58115	0.113843	0.220202	TRUE
ALG10	2.11712	0.46656	0.687098	0.67903	0.497119	0.631773	TRUE
ALG11	17.0914	-0.0808343	0.338831	-0.238568	0.811441	0.878071	TRUE
ALG12	16.2807	-0.242487	0.341206	-0.710676	0.477285	0.614525	TRUE
ALG13	6.6736	-0.704852	0.50744	-1.38904	0.164822	0.289651	TRUE
ALG14	18.5495	-0.235418	0.380409	-0.618855	0.536012	0.667038	TRUE
ALG2	30.295	0.430819	0.317799	1.35563	0.175216	0.302779	TRUE
ALG3	48.6366	1.08527	0.289715	3.74599	0.000179685	0.00125258	TRUE
ALG5	21.5635	-0.417762	0.328158	-1.27305	0.203	0.337664	TRUE
ALG6	105.657	0.894407	0.280351	3.19031	0.00142122	0.00684337	TRUE
ALG8	5.51843	-0.252126	0.57023	-0.442147	0.658383	0.766098	TRUE
ALG9	12.7932	0.0458404	0.394224	0.11628	0.907431	0.943098	TRUE
ALK	0	NA	NA	NA	NA	NA	TRUE
ALKBH1	21.7117	-0.396725	0.338092	-1.17342	0.240626	0.383109	TRUE
ALKBH2	8.70095	0.984894	0.547802	1.7979	0.0721929	0.155256	TRUE
ALKBH3	90.5581	0.71511	0.22006	3.24962	0.00115561	0.00581312	TRUE
ALKBH4	23.7891	0.817722	0.318031	2.5712	0.0101348	0.0341134	TRUE
ALKBH5	8.4583	0.319528	0.452244	0.706539	0.479853	0.616846	TRUE
ALKBH6	0	NA	NA	NA	NA	NA	TRUE
ALKBH7	37.3838	1.22255	0.285493	4.28223	1.85026e-05	0.000190763	TRUE
ALKBH8	0.879569	-0.2982	0.714332	-0.417453	0.676347	NA	TRUE
ALLC	0	NA	NA	NA	NA	NA	FALSE
ALMS1	30.3838	-0.0359196	0.273666	-0.131253	0.895575	0.936009	TRUE
ALOX12	777.448	1.3321	0.30846	4.31855	1.57058e-05	0.000165545	TRUE
ALOX12B	0	NA	NA	NA	NA	NA	TRUE
ALOX12E	27.4043	1.46838	0.335996	4.37024	1.24109e-05	0.000135351	FALSE
ALOX15	9422.4	1.59139	0.423215	3.76024	0.000169753	0.00119971	TRUE
ALOX15B	0	NA	NA	NA	NA	NA	FALSE
ALOX5	35.9526	-0.482777	0.353961	-1.36393	0.17259	0.299463	TRUE
ALOX5AP	236.848	-0.786661	0.193121	-4.07341	4.63294e-05	0.000410408	FALSE
ALOXE3	0.247451	0.342526	0.520932	0.657525	0.510843	NA	TRUE
ALPI	0	NA	NA	NA	NA	NA	TRUE
ALPK1	5.64358	-1.96979	0.658009	-2.99356	0.00275743	0.0118538	TRUE
ALPK2	9.84686	-2.12714	0.557467	-3.81573	0.00013578	0.000995748	TRUE
ALPK3	1.26418	-0.708808	0.716688	-0.989004	0.322661	0.467107	TRUE
ALPL	8.78139	-0.353252	0.471954	-0.748488	0.454166	0.592846	TRUE
ALPP	0	NA	NA	NA	NA	NA	FALSE
ALPPL2	3.56009	2.34594	0.702005	3.34177	0.000832447	0.00445218	FALSE
ALS2	11.3073	-0.455163	0.414235	-1.0988	0.271853	0.418228	TRUE
ALS2CL	131.598	-0.127673	0.469152	-0.272136	0.785518	0.85894	TRUE
ALS2CR11	0	NA	NA	NA	NA	NA	TRUE
ALS2CR12	0.712851	0.173182	0.65922	0.262707	0.792777	NA	TRUE
ALX1	0	NA	NA	NA	NA	NA	TRUE
ALX3	0	NA	NA	NA	NA	NA	TRUE
ALX4	0	NA	NA	NA	NA	NA	TRUE
ALYREF	60.967	0.479458	0.228023	2.10268	0.0354939	0.0909307	TRUE
AMACR	12.3054	0.331402	0.525687	0.630417	0.528422	0.659868	TRUE
AMBN	0	NA	NA	NA	NA	NA	TRUE
AMBP	40.5052	0.551473	0.550114	1.00247	0.316116	0.460312	TRUE
AMBRA1	66.4987	-0.188906	0.205888	-0.91752	0.35887	0.501485	TRUE
AMD1	204.205	0.792082	0.229296	3.45441	0.000551495	0.00318564	TRUE
AMDHD1	0.916334	1.36254	0.698563	1.95049	0.0511174	NA	TRUE
AMDHD2	64.3392	0.869621	0.30319	2.86824	0.0041276	0.0164741	TRUE
AMELX	0	NA	NA	NA	NA	NA	FALSE
AMER1	0.57996	-0.175492	0.643699	-0.272631	0.785137	NA	TRUE
AMER2	0	NA	NA	NA	NA	NA	TRUE
AMER3	0	NA	NA	NA	NA	NA	TRUE
AMFR	789.918	0.540714	0.210448	2.56935	0.010189	0.0342867	TRUE
AMH	0.963705	0.0406031	0.704829	0.057607	0.954062	NA	TRUE
AMHR2	2.4578	-0.385026	0.659328	-0.583968	0.559242	0.686559	TRUE
AMICA1	32.1386	-2.07745	0.512141	-4.0564	4.98341e-05	0.000435738	TRUE
AMIGO1	38.2388	1.03853	0.272263	3.81443	0.000136499	0.000999827	TRUE
AMIGO2	1.64562	0.43158	0.708403	0.609229	0.542373	0.672091	TRUE
AMIGO3	4.56564	-0.367144	0.551855	-0.665291	0.505865	0.639709	TRUE
AMMECR1	0.302756	-0.205599	0.535063	-0.384252	0.700791	NA	TRUE
AMMECR1L	24.4765	-0.134918	0.354247	-0.380859	0.703308	0.799785	TRUE
AMN	0	NA	NA	NA	NA	NA	TRUE
AMN1	11.0513	-0.391873	0.405133	-0.967271	0.333409	0.477706	TRUE
AMOT	0.523172	-0.156664	0.632324	-0.247758	0.804321	NA	TRUE
AMOTL1	0.796758	0.526696	0.687232	0.766402	0.443437	NA	TRUE
AMOTL2	0.852039	-0.680564	0.699635	-0.972742	0.330681	NA	TRUE
AMPD1	0.706548	0.480551	0.689303	0.697154	0.485707	NA	TRUE
AMPD2	41.6494	-0.204921	0.236468	-0.866593	0.386165	0.527895	TRUE
AMPD3	31.4404	-2.04109	0.444591	-4.59093	4.41268e-06	5.56988e-05	TRUE
AMPH	0.65554	0.519492	0.686835	0.756356	0.449436	NA	TRUE
AMT	10.6881	-0.124269	0.445134	-0.279172	0.780113	0.854952	TRUE
AMTN	0	NA	NA	NA	NA	NA	FALSE
AMY1A	5.55985	0.561721	0.546779	1.02733	0.304266	0.450965	TRUE
AMY2A3	0	NA	NA	NA	NA	NA	FALSE
AMZ1	71.9756	-1.52066	0.308963	-4.92181	8.57467e-07	1.38424e-05	TRUE
AMZ2	31.3128	-0.162271	0.264427	-0.613673	0.539432	0.669664	TRUE
ANAPC1	37.4363	-0.0397008	0.250252	-0.158643	0.87395	0.920386	TRUE
ANAPC10	16.2662	-0.0281027	0.349667	-0.08037	0.935943	0.962055	TRUE
ANAPC11	110.961	1.19549	0.304533	3.92564	8.64985e-05	0.000687235	TRUE
ANAPC13	138.38	1.33128	0.322584	4.12691	3.67668e-05	0.000339422	TRUE
ANAPC15	143.945	1.53359	0.224748	6.82359	8.87922e-12	6.26087e-10	TRUE
ANAPC16	43.876	0.180677	0.26746	0.675528	0.49934	0.633409	TRUE
ANAPC2	164.488	0.156002	0.203544	0.766426	0.443423	0.583325	TRUE
ANAPC4	40.8223	-0.135505	0.248302	-0.545725	0.585255	0.708485	TRUE
ANAPC5	340.226	0.900524	0.210963	4.26863	1.96673e-05	0.000200747	TRUE
ANAPC7	62.5096	0.243185	0.291182	0.835167	0.403624	0.545481	TRUE
ANDPRO	0	NA	NA	NA	NA	NA	FALSE
ANG	0	NA	NA	NA	NA	NA	FALSE
ANG1	5.74186	0.667864	0.643754	1.03745	0.299526	0.446794	FALSE
ANG2	0	NA	NA	NA	NA	NA	FALSE
ANGEL1	10.3665	-0.440948	0.429335	-1.02705	0.304398	0.450965	TRUE
ANGEL2	26.5972	-0.487099	0.341688	-1.42557	0.153994	0.275942	TRUE
ANGPT1	51.2861	-0.368439	0.402075	-0.916344	0.359486	0.501996	TRUE
ANGPT2	1.42508	-0.57095	0.715749	-0.797696	0.425047	0.564566	TRUE
ANGPT4	0	NA	NA	NA	NA	NA	TRUE
ANGPTL1	0.247451	0.342526	0.520932	0.657525	0.510843	NA	TRUE
ANGPTL2	0.632395	0.478585	0.5262	0.909511	0.36308	NA	TRUE
ANGPTL3	7.60323	0.520027	0.547872	0.949176	0.342531	0.486346	TRUE
ANGPTL4	9.26827	-0.451726	0.434137	-1.04051	0.298101	0.44559	TRUE
ANGPTL6	1.727	0.0274126	0.70449	0.0389113	0.968961	0.981359	TRUE
ANK1	141.79	0.377602	0.390195	0.967727	0.333181	0.477491	TRUE
ANK2	0.458249	0.562784	0.585979	0.960417	0.336845	NA	TRUE
ANK3	0.249832	-0.193354	0.596686	-0.324046	0.745903	NA	TRUE
ANKAR	0.148914	0.0036984	0.522999	0.00707152	0.994358	NA	TRUE
ANKDD1A	1.50607	-0.650551	0.700951	-0.928098	0.353357	0.496147	TRUE
ANKDD1B	5.61498	-0.0272994	0.503882	-0.0541781	0.956793	0.973778	TRUE
ANKEF1	0	NA	NA	NA	NA	NA	TRUE
ANKFY1	45.6082	-1.06134	0.360789	-2.94173	0.00326384	0.0135835	TRUE
ANKH	33.309	-0.655394	0.446308	-1.46848	0.141974	0.259781	TRUE
ANKHD1	75.593	-0.612782	0.224089	-2.73455	0.00624652	0.0231466	TRUE
ANKIB1	12.3482	-1.15813	0.535539	-2.16256	0.0305753	0.0813903	TRUE
ANKK1	0	NA	NA	NA	NA	NA	TRUE
ANKLE1	6.82233	0.552875	0.548574	1.00784	0.313531	0.458255	FALSE
ANKLE2	9.74845	-1.5704	0.515145	-3.04846	0.00230017	0.0102509	TRUE
ANKMY1	3.22197	0.335771	0.649386	0.517058	0.605115	0.723628	TRUE
ANKMY2	63.4215	-0.218099	0.195909	-1.11327	0.265594	0.411281	TRUE
ANKRA2	0	NA	NA	NA	NA	NA	TRUE
ANKRD1	0	NA	NA	NA	NA	NA	TRUE
ANKRD10	23.6609	-0.521772	0.356893	-1.46198	0.143745	0.261975	TRUE
ANKRD11	98.4878	-1.10065	0.327923	-3.35643	0.000789549	0.00426551	TRUE
ANKRD12	16.8389	-1.29557	0.400511	-3.2348	0.0012173	0.00604491	TRUE
ANKRD13A	411.161	-0.144747	0.132528	-1.0922	0.274746	0.421358	TRUE
ANKRD13B	22.0264	1.74067	0.321449	5.41508	6.12624e-08	1.42085e-06	TRUE
ANKRD13C	36.5037	-1.03088	0.340383	-3.02858	0.00245704	0.0108244	TRUE
ANKRD13D	21.9225	-0.350059	0.292428	-1.19708	0.231277	0.372282	TRUE
ANKRD16	15.7477	0.2068	0.379022	0.545615	0.585331	0.708507	TRUE
ANKRD17	72.056	-0.364825	0.241079	-1.5133	0.130203	0.243976	TRUE
ANKRD2	0.0278593	0.183262	0.520802	0.351885	0.724925	NA	TRUE
ANKRD22	1.69613	-0.68359	0.629426	-1.08605	NA	NA	TRUE
ANKRD23	2.33105	0.0323431	0.653382	0.049501	0.96052	0.976195	TRUE
ANKRD24	0.0931953	0.13196	0.521515	0.253032	0.800243	NA	TRUE
ANKRD26	2.13803	0.104102	0.66093	0.157509	0.874844	0.92109	TRUE
ANKRD27	24.0559	-0.953676	0.334157	-2.85398	0.00431756	0.0170933	TRUE
ANKRD28	10.4465	-0.32106	0.472727	-0.679166	0.497033	0.631731	TRUE
ANKRD29	0.393326	0.0474814	0.669588	0.0709114	0.943468	NA	TRUE
ANKRD32	4.47917	-0.213896	0.603437	-0.354464	0.722991	0.813349	TRUE
ANKRD33B	6.67331	-0.559309	0.493359	-1.13367	0.256931	0.401685	TRUE
ANKRD34A	0.100919	0.0341722	0.522682	0.0653787	0.947873	NA	TRUE
ANKRD34B	0	NA	NA	NA	NA	NA	FALSE
ANKRD34C	0	NA	NA	NA	NA	NA	TRUE
ANKRD35	0.0278593	0.183262	0.520802	0.351885	0.724925	NA	TRUE
ANKRD36	0.0730593	0.0833984	0.522124	0.159729	0.873094	NA	FALSE
ANKRD37	1.30015	-0.0902783	0.703923	-0.12825	0.897951	0.937853	TRUE
ANKRD39	1.40242	-0.461428	0.710476	-0.649463	0.516039	0.64883	FALSE
ANKRD40	43.9882	-0.206417	0.25687	-0.803585	0.421637	0.562045	TRUE
ANKRD42	4.66384	-0.810243	0.594842	-1.36212	0.173162	0.300075	TRUE
ANKRD44	114.622	-0.892996	0.25653	-3.48106	0.000499438	0.00293468	TRUE
ANKRD45	4.79542	0.685346	0.652897	1.0497	0.293856	0.441396	TRUE
ANKRD46	42.7029	0.82152	0.220158	3.7315	0.000190341	0.0013164	TRUE
ANKRD49	21.0305	0.220903	0.343906	0.642334	0.520656	0.652696	TRUE
ANKRD50	3.3157	-0.615508	0.625752	-0.983628	0.325298	0.470148	TRUE
ANKRD52	5.50251	-1.64785	0.629374	-2.61823	0.00883865	0.03059	TRUE
ANKRD54	13.6913	-0.907804	0.454589	-1.99698	0.0458274	0.110659	TRUE
ANKRD55	0.0278593	0.183262	0.520802	0.351885	0.724925	NA	TRUE
ANKRD6	2.33049	-1.20402	0.69052	-1.74364	0.0812223	0.169649	TRUE
ANKRD60	0.100919	0.0341722	0.522682	0.0653787	0.947873	NA	FALSE
ANKRD61	1.10156	-0.579766	0.704974	-0.822394	0.410853	0.552472	TRUE
ANKRD63	33.0193	0.348075	0.316967	1.09814	0.272143	0.418546	FALSE
ANKRD65	0	NA	NA	NA	NA	NA	TRUE
ANKRD66	1.81039	0.361615	0.71672	0.504541	0.613881	0.731376	TRUE
ANKRD7	0	NA	NA	NA	NA	NA	FALSE
ANKRD9	10.9242	0.599154	0.430413	1.39205	0.163909	0.288563	TRUE
ANKS1A	33.6164	-0.618065	0.318663	-1.93956	0.0524338	0.122419	TRUE
ANKS1B	0	NA	NA	NA	NA	NA	TRUE
ANKS3	46.1475	0.780925	0.240122	3.25221	0.00114512	0.00577457	TRUE
ANKS4B	1.45586	0.748364	0.716151	1.04498	0.296032	0.443524	TRUE
ANKS6	2.09424	0.222146	0.70274	0.316115	0.751916	0.834336	TRUE
ANKUB1	0	NA	NA	NA	NA	NA	TRUE
ANKZF1	54.0607	-0.418062	0.235318	-1.77658	0.0756371	0.160719	TRUE
ANLN	0.210798	0.342526	0.520932	0.657525	0.510843	NA	TRUE
ANLNL1	0	NA	NA	NA	NA	NA	FALSE
ANO1	0.543637	-0.601377	0.653481	-0.920267	0.357433	NA	TRUE
ANO10	83.7625	0.680033	0.25688	2.64728	0.00811412	0.0285659	TRUE
ANO3	0	NA	NA	NA	NA	NA	TRUE
ANO4	0	NA	NA	NA	NA	NA	TRUE
ANO5	0.0278593	0.183262	0.520802	0.351885	0.724925	NA	TRUE
ANO6	172.863	0.436367	0.234027	1.8646	0.0622376	0.139037	TRUE
ANO7	0.100919	0.0341722	0.522682	0.0653787	0.947873	NA	FALSE
ANO8	29.5261	-0.681082	0.283966	-2.39847	0.0164639	0.0500518	TRUE
ANO9	2.1969	0.545333	0.672024	0.811479	0.41709	0.557803	TRUE
ANP32A	29.2159	-0.361646	0.305139	-1.18519	0.235944	0.377677	TRUE
ANP32B	239.011	0.42594	0.173777	2.45107	0.0142431	0.0445559	TRUE
ANP32E	94.9249	-0.0798744	0.222064	-0.359691	0.719078	0.810507	TRUE
ANPEP	129.172	-0.884752	0.248502	-3.56034	0.000370371	0.00229963	TRUE
ANTXR1	0.49704	-0.124947	0.637205	-0.196086	0.844543	NA	FALSE
ANTXR2	77.7134	-0.762907	0.24952	-3.05749	0.00223196	0.00998289	TRUE
ANTXRL	0	NA	NA	NA	NA	NA	TRUE
ANXA1	348.324	-1.26151	0.250211	-5.04176	4.61259e-07	8.24954e-06	TRUE
ANXA10	0	NA	NA	NA	NA	NA	FALSE
ANXA11	442.957	0.0659282	0.13186	0.499986	0.617085	0.733815	TRUE
ANXA13	0	NA	NA	NA	NA	NA	TRUE
ANXA2	1797.57	-0.00371837	0.209729	-0.0177294	0.985855	0.9907	TRUE
ANXA3	25.5086	0.201031	0.395038	0.50889	0.61083	0.728828	TRUE
ANXA4	110.233	-1.00159	0.188937	-5.30118	1.15058e-07	2.45504e-06	TRUE
ANXA5	257.07	-0.460474	0.239076	-1.92606	0.0540969	0.125097	TRUE
ANXA6	1278.24	0.877943	0.276937	3.17019	0.0015234	0.00726448	TRUE
ANXA7	290.947	0.0863891	0.209871	0.41163	0.680611	0.782754	TRUE
ANXA8	2.57766	-0.572902	0.712704	-0.803842	0.421488	0.561969	FALSE
ANXA9	0.858195	-0.731021	0.700463	-1.04362	0.296659	NA	TRUE
AOAH	33.0144	-2.05609	0.333135	-6.17195	6.74532e-10	2.76784e-08	TRUE
AOC1	0	NA	NA	NA	NA	NA	FALSE
AOC3	2.08549	0.700185	0.656208	1.06702	0.285964	0.433151	TRUE
AOX1	5.25594	1.6499	0.716735	2.30196	0.0213373	0.061467	TRUE
AOX2	0	NA	NA	NA	NA	NA	FALSE
AOX3	6.81955	1.24986	0.515177	2.42609	0.0152626	0.0471182	FALSE
AOX4	7.3581	-0.438318	0.649463	-0.674893	0.499744	0.633797	FALSE
AP1AR	15.228	-1.14924	0.487036	-2.35966	0.0182915	0.0544545	TRUE
AP1B1	93.3534	0.0257859	0.183571	0.140468	0.88829	0.930695	TRUE
AP1G1	24.4117	-0.530465	0.322034	-1.64723	0.0995104	0.198455	TRUE
AP1M1	268.79	0.31529	0.148737	2.11978	0.0340246	0.0881751	TRUE
AP1M2	1.58373	0.647428	0.711417	0.910054	0.362794	0.505217	TRUE
AP1S1	35.1914	0.0739347	0.281661	0.262495	0.79294	0.864562	FALSE
AP1S2	31.5538	-1.26846	0.366366	-3.46227	0.000535641	0.00311164	TRUE
AP1S3	3.46453	-0.472274	0.646287	-0.730749	0.464932	0.602726	TRUE
AP2A1	87.5603	-0.0246872	0.196411	-0.125692	0.899976	0.938849	FALSE
AP2A2	1392.12	0.978701	0.222403	4.40057	1.07968e-05	0.000120886	TRUE
AP2B1	80.0174	0.883909	0.247016	3.57836	0.000345762	0.00217402	TRUE
AP2M1	2200.26	1.5092	0.217776	6.93006	4.20659e-12	3.2873e-10	TRUE
AP2S1	231.907	0.899683	0.218315	4.12103	3.77181e-05	0.000346639	TRUE
AP3B1	112.849	0.190115	0.251937	0.754611	0.450482	0.589462	TRUE
AP3B2	2.13929	0.372754	0.665129	0.560424	0.57519	0.7001	TRUE
AP3D1	440.683	0.296078	0.162224	1.82512	0.067983	0.148413	TRUE
AP3M1	42.5711	-1.13023	0.279676	-4.04122	5.31748e-05	0.000459438	FALSE
AP3M2	5.06518	-0.307044	0.576048	-0.533019	0.59402	0.715355	TRUE
AP3S1	58.343	-0.0666093	0.258905	-0.257273	0.796968	0.867459	TRUE
AP3S2	51.4976	0.358449	0.30003	1.19471	0.232201	0.373197	TRUE
AP4B1	40.8677	-0.0798334	0.277816	-0.287361	0.773836	0.850277	TRUE
AP4E1	2.21446	0.23855	0.697498	0.342007	0.732345	0.820411	TRUE
AP4M1	15.9422	-0.384318	0.425229	-0.90379	0.366107	0.507888	TRUE
AP4S1	44.0422	0.513799	0.255689	2.00947	0.0444875	0.108128	TRUE
AP5B1	80.247	-0.103422	0.196836	-0.525422	0.59929	0.719371	TRUE
AP5M1	12.3865	-0.907541	0.46167	-1.96578	0.0493239	0.116783	TRUE
AP5S1	16.0445	0.352011	0.415229	0.84775	0.396577	0.537993	TRUE
AP5Z1	71.9733	0.0695079	0.196618	0.353518	0.7237	0.813739	TRUE
APAF1	22.5233	-1.34887	0.391151	-3.44848	0.000563759	0.00324122	TRUE
APBA1	8.75464	-1.15586	0.494158	-2.33906	0.0193323	0.0567843	TRUE
APBA2	0	NA	NA	NA	NA	NA	TRUE
APBA3	43.0014	0.362347	0.312409	1.15985	0.246111	0.389819	TRUE
APBB1	16.002	1.40837	0.416311	3.38297	0.000717061	0.00395221	TRUE
APBB1IP	249.348	-1.01921	0.191232	-5.32973	9.83579e-08	2.12831e-06	TRUE
APBB2	14.9338	0.379609	0.355361	1.06823	0.285415	0.432636	TRUE
APBB3	19.3446	-0.167441	0.417292	-0.401255	0.688232	0.788818	TRUE
APC	10.7032	-1.13181	0.491445	-2.30303	0.0212772	0.0613515	TRUE
APC2	1.15212	1.17554	0.701083	1.67674	0.0935925	0.189112	TRUE
APCDD1	1.60507	-0.910917	0.716725	-1.27094	0.203749	0.338496	TRUE
APCDD1L	0.766977	0.266891	0.712396	0.374638	0.70793	NA	FALSE
APCS	4.44899	0.559761	0.545824	1.02553	0.305111	0.451083	TRUE
APEH	331.18	0.549184	0.25537	2.15055	0.0315121	0.0832699	TRUE
APEX1	96.7323	1.52638	0.295642	5.16291	2.43136e-07	4.72747e-06	TRUE
APEX2	14.8776	0.231425	0.357142	0.647993	0.51699	0.649759	TRUE
APEX2L1	0	NA	NA	NA	NA	NA	FALSE
APH1A	79.7273	-0.52037	0.183444	-2.83667	0.00455866	0.0179263	TRUE
APH1B	45.5878	2.02406	0.29718	6.81088	9.70053e-12	6.72406e-10	FALSE
API5	115.224	-0.681222	0.204281	-3.33474	0.000853794	0.0045485	TRUE
APIP	7.46737	0.630597	0.501869	1.2565	0.208935	0.344778	TRUE
APITD1	8.90757	1.97229	0.50651	3.89387	9.86556e-05	0.00076608	TRUE
APLF	24.1645	0.266077	0.385889	0.689516	0.490498	0.62615	TRUE
APLN	0	NA	NA	NA	NA	NA	TRUE
APLNR	0.479998	0.450646	0.63659	0.707906	0.479004	NA	TRUE
APLP1	0.48849	-0.156528	0.685929	-0.228199	0.819492	NA	TRUE
APLP2	66.335	-0.470225	0.221383	-2.12403	0.0336672	0.0874393	TRUE
APMAP	15.0364	-0.806282	0.455646	-1.76954	0.0768045	0.162608	TRUE
APOA1	19.5867	2.6807	0.643033	4.16884	3.0616e-05	0.000291863	TRUE
APOA1BP	49.5127	1.00862	0.271689	3.7124	0.000205303	0.00140483	TRUE
APOA2	5.73614	1.12508	0.716731	1.56973	0.116477	0.22392	TRUE
APOA4	13.0763	0.515202	0.549033	0.93838	0.348049	0.491281	TRUE
APOA5	6.97858	0.563324	0.547556	1.0288	0.303575	0.450534	TRUE
APOB	95.0052	0.545053	0.550418	0.990253	0.32205	0.466278	TRUE
APOBEC1	16.9172	-1.25886	0.378283	-3.32783	0.000875258	0.00463668	TRUE
APOBEC2	0.565958	-0.38273	0.692288	-0.552848	0.580368	NA	TRUE
APOBEC3B	14.8544	0.36366	0.365164	0.99588	0.319308	0.46362	FALSE
APOBEC4	0	NA	NA	NA	NA	NA	TRUE
APOBR	244.385	-0.16942	0.281773	-0.601264	0.547664	0.676461	TRUE
APOC1	5.40592	0.561503	0.546673	1.02713	0.30436	0.450965	TRUE
APOC2	5.02452	0.560871	0.546365	1.02655	0.304633	0.451012	TRUE
APOC3	27.0736	1.15555	0.677052	1.70674	0.0878703	0.18001	TRUE
APOC4	1.9083	1.35768	0.678076	2.00226	0.0452571	0.109648	FALSE
APOD	0	NA	NA	NA	NA	NA	TRUE
APOE	355.412	2.83825	0.705371	4.02377	5.7274e-05	0.000488322	TRUE
APOF	2.75705	0.553867	0.542926	1.02015	0.307656	0.452648	FALSE
APOH	29.0276	0.563034	0.559371	1.00655	0.314152	0.458794	TRUE
APOL11A	64.6341	-3.716	0.430229	-8.63726	5.75768e-18	1.90922e-15	FALSE
APOL2	1.03665	0.796316	0.69696	1.14256	0.253223	NA	TRUE
APOL3	232.973	-0.526806	0.189097	-2.78591	0.00533774	0.0203888	FALSE
APOL9A	1.66748	-0.186721	0.716671	-0.26054	0.794448	0.865407	FALSE
APOLD1	0.434798	0.597815	0.636542	0.939161	0.347648	NA	TRUE
APOM	9.68288	0.786753	0.50598	1.55491	0.119968	0.229295	TRUE
APON	1.6975	1.2766	0.670417	1.90419	0.056886	0.130042	FALSE
APOO	4.69027	-0.491409	0.558184	-0.880371	0.378658	0.520125	TRUE
APOOL	5.54199	-0.0968574	0.525928	-0.184165	0.853884	0.907983	TRUE
APOPT1	55.5645	0.800575	0.28804	2.77939	0.00544606	0.0207123	TRUE
APP	119.364	1.68242	0.242181	6.94696	3.73251e-12	2.97365e-10	TRUE
APPBP2	45.4211	-0.176919	0.251862	-0.702444	0.482402	0.618947	TRUE
APPL1	21.0209	-0.61896	0.314378	-1.96884	0.0489712	0.116152	TRUE
APPL2	0.901876	-0.930097	0.675923	-1.37604	0.168809	NA	TRUE
APRT	373.149	0.567761	0.227555	2.49505	0.0125941	0.040513	TRUE
APTX	10.5865	0.340346	0.438147	0.776787	0.437285	0.576825	TRUE
AQP1	2921.16	0.181988	0.286184	0.635911	0.524834	0.656725	TRUE
AQP11	0	NA	NA	NA	NA	NA	TRUE
AQP12A	1.06631	-0.514904	0.71658	-0.718558	0.472413	NA	TRUE
AQP2	0	NA	NA	NA	NA	NA	TRUE
AQP3	0.926827	0.751637	0.709745	1.05902	0.289589	NA	TRUE
AQP4	0.292237	-0.186933	0.526245	-0.355221	0.722424	NA	TRUE
AQP5	1.16201	-0.160754	0.688873	-0.233357	0.815484	0.88004	TRUE
AQP6	0	NA	NA	NA	NA	NA	TRUE
AQP7	0	NA	NA	NA	NA	NA	TRUE
AQP8	2.64887	0.553218	0.542604	1.01956	0.307937	0.452831	TRUE
AQP9	18.8213	-0.623944	0.393278	-1.58652	0.112621	0.218264	TRUE
AQPEP	0.0835778	0.0604541	0.522391	0.115726	0.90787	NA	TRUE
AQR	60.8193	-0.581729	0.196778	-2.95627	0.0031138	0.0130699	TRUE
AR	0.0730593	0.0833984	0.522124	0.159729	0.873094	NA	TRUE
ARAF	148.206	0.591699	0.217259	2.72348	0.0064598	0.0237291	TRUE
ARAP1	399.679	-1.10819	0.161996	-6.84086	7.87193e-12	5.73512e-10	TRUE
ARAP2	6.94411	-0.999075	0.511219	-1.9543	0.0506655	0.119381	TRUE
ARAP3	76.7146	-1.36604	0.335844	-4.06748	4.75248e-05	0.000419785	TRUE
ARC	0.0557186	0.114828	0.521737	0.220088	0.825803	NA	FALSE
ARCN1	124.508	-0.560084	0.194522	-2.87928	0.00398578	0.0160386	TRUE
AREG	0	NA	NA	NA	NA	NA	TRUE
AREL1	96.6757	-0.773296	0.19522	-3.96115	7.45903e-05	0.000608374	TRUE
ARF1	565.449	-0.0454618	0.127903	-0.355441	0.722259	0.812869	TRUE
ARF2	12.344	-0.350472	0.393724	-0.890146	0.373387	0.515018	FALSE
ARF3	308.741	0.341943	0.162208	2.10805	0.0350269	0.0900933	TRUE
ARF4	73.2469	-0.913722	0.26152	-3.4939	0.000476027	0.00282964	TRUE
ARF5	802.42	0.875424	0.194392	4.50339	6.68784e-06	7.96632e-05	TRUE
ARF6	113.098	-0.338852	0.170036	-1.99283	0.04628	0.111488	TRUE
ARFGAP1	369.558	0.987745	0.246081	4.01391	5.97219e-05	0.000506028	TRUE
ARFGAP2	163.652	0.420314	0.195288	2.15228	0.0313756	0.0830212	TRUE
ARFGAP3	35.4115	-0.401371	0.249282	-1.61011	0.107374	0.210778	TRUE
ARFGEF1	49.8383	-1.53246	0.30317	-5.05479	4.30862e-07	7.79681e-06	TRUE
ARFGEF2	36.5688	-0.667484	0.278186	-2.39942	0.0164213	0.0499561	TRUE
ARFIP1	9.98575	-1.30592	0.473066	-2.76054	0.00577051	0.0216703	TRUE
ARFIP2	81.2964	0.0278025	0.182775	0.152113	0.879097	0.924141	TRUE
ARFRP1	62.3868	-0.0404978	0.1918	-0.211146	0.832774	0.893667	TRUE
ARG1	6.06442	0.740418	0.624707	1.18522	0.235929	0.377677	TRUE
ARG2	0.735366	-0.104352	0.650853	-0.160331	0.87262	NA	TRUE
ARGLU1	119.362	0.0923027	0.15653	0.589679	0.555406	0.683272	TRUE
ARHGAP1	137.61	-0.0337579	0.174071	-0.193932	0.846229	0.903493	TRUE
ARHGAP10	60.4985	1.48398	0.265181	5.59611	2.19211e-08	5.82144e-07	TRUE
ARHGAP11A	9.60029	-1.33927	0.47883	-2.79697	0.00515848	0.0198151	TRUE
ARHGAP12	8.93111	0.215947	0.52213	0.413588	0.679176	0.781616	TRUE
ARHGAP15	76.6961	0.00435973	0.204874	0.0212801	0.983022	0.988744	TRUE
ARHGAP17	153.669	-0.818462	0.176954	-4.62529	3.74081e-06	4.83116e-05	TRUE
ARHGAP18	44.7164	-0.337505	0.272992	-1.23632	0.21634	0.35414	TRUE
ARHGAP19	1.15918	-1.13748	0.714898	-1.5911	0.111587	0.216657	TRUE
ARHGAP20	0.0278593	0.183262	0.520802	0.351885	0.724925	NA	TRUE
ARHGAP21	15.522	-0.600287	0.405957	-1.4787	0.139222	0.256242	TRUE
ARHGAP22	23.6907	-0.451267	0.367069	-1.22938	0.21893	0.357102	TRUE
ARHGAP23	22.9105	-0.461758	0.322235	-1.43299	0.151862	0.273315	TRUE
ARHGAP24	18.7168	-0.727494	0.366558	-1.98466	0.047182	0.113084	TRUE
ARHGAP25	222.763	-0.710267	0.172141	-4.12608	3.68995e-05	0.000340391	TRUE
ARHGAP26	30.4615	-1.17224	0.380057	-3.08438	0.00203979	0.00926552	TRUE
ARHGAP27	183.999	-0.591065	0.180523	-3.27419	0.00105966	0.00541707	TRUE
ARHGAP28	30.5777	0.871305	0.373903	2.3303	0.0197903	0.0578939	TRUE
ARHGAP29	0.602834	0.627359	0.649017	0.96663	0.333729	NA	TRUE
ARHGAP30	311.041	-1.00948	0.200892	-5.02498	5.03484e-07	8.87536e-06	TRUE
ARHGAP31	2.38828	-0.699481	0.648413	-1.07876	0.280696	0.427649	TRUE
ARHGAP32	0.0730593	0.0833984	0.522124	0.159729	0.873094	NA	TRUE
ARHGAP33	6.50447	0.784528	0.480523	1.63265	0.102542	0.203147	TRUE
ARHGAP35	14.7186	0.442528	0.375982	1.17699	0.239199	0.38138	TRUE
ARHGAP36	0.0278593	0.183262	0.520802	0.351885	0.724925	NA	TRUE
ARHGAP39	14.2135	-0.719781	0.378985	-1.89923	0.0575338	0.13118	TRUE
ARHGAP4	668.559	0.636008	0.18389	3.45863	0.000542932	0.00314654	TRUE
ARHGAP40	0	NA	NA	NA	NA	NA	FALSE
ARHGAP42	0.529774	0.682773	0.59604	1.14552	0.251995	NA	TRUE
ARHGAP44	0.0278593	0.183262	0.520802	0.351885	0.724925	NA	TRUE
ARHGAP5	0.581685	-0.303331	0.694173	-0.436967	0.662135	NA	TRUE
ARHGAP6	9.29956	0.460039	0.427574	1.07593	0.28196	0.428776	TRUE
ARHGAP8	0.345879	0.0498017	0.543237	0.0916758	0.926956	NA	TRUE
ARHGAP9	567.771	-0.174411	0.148391	-1.17535	0.239855	0.382031	TRUE
ARHGDIA	2106.69	0.69043	0.225324	3.06417	0.00218275	0.00981208	TRUE
ARHGDIB	3859.33	0.838022	0.244609	3.42597	0.000612608	0.00346843	FALSE
ARHGDIG	0	NA	NA	NA	NA	NA	TRUE
ARHGEF1	1006.89	0.150467	0.103398	1.45522	0.145608	0.264348	TRUE
ARHGEF10	10.861	2.00328	0.495498	4.04297	5.27786e-05	0.000457626	TRUE
ARHGEF10L	79.5201	-1.55631	0.207559	-7.49814	6.473e-14	9.02469e-12	TRUE
ARHGEF11	8.77343	-1.47755	0.528978	-2.79322	0.00521856	0.0200208	TRUE
ARHGEF12	122.062	0.459822	0.324082	1.41885	0.155944	0.278379	TRUE
ARHGEF15	0.426005	0.486125	0.632978	0.767998	0.442489	NA	TRUE
ARHGEF16	0.0931953	0.13196	0.521515	0.253032	0.800243	NA	TRUE
ARHGEF17	1.78129	-0.383914	0.714891	-0.537024	0.591251	0.71335	TRUE
ARHGEF18	374.075	0.0435942	0.149296	0.291997	0.770289	0.848126	TRUE
ARHGEF19	0.740573	0.884976	0.621937	1.42294	0.154755	NA	TRUE
ARHGEF2	214.735	-0.133017	0.126534	-1.05123	0.293153	0.440826	TRUE
ARHGEF25	0.159488	0.342526	0.520932	0.657525	0.510843	NA	TRUE
ARHGEF26	0.491341	0.48653	0.676549	0.719135	0.472058	NA	TRUE
ARHGEF28	0.858223	-0.328783	0.696176	-0.47227	0.636734	NA	TRUE
ARHGEF3	167.539	-1.34273	0.201943	-6.64907	2.94959e-11	1.91474e-09	TRUE
ARHGEF33	0	NA	NA	NA	NA	NA	TRUE
ARHGEF37	95.0522	-0.748876	0.418928	-1.7876	0.0738402	0.157775	TRUE
ARHGEF38	0	NA	NA	NA	NA	NA	TRUE
ARHGEF39	0.512326	-0.145397	0.640477	-0.227013	0.820413	NA	TRUE
ARHGEF4	63.6482	-0.169934	0.199885	-0.85016	0.395236	0.536945	TRUE
ARHGEF40	1.14619	0.586153	0.707095	0.82896	0.407127	0.548484	TRUE
ARHGEF5	0.404912	0.0479766	0.671143	0.0714849	0.943012	NA	TRUE
ARHGEF6	31.7652	-1.11736	0.346408	-3.22555	0.00125732	0.00620019	TRUE
ARHGEF7	11.9403	-1.07375	0.45468	-2.36155	0.0181986	0.0542596	TRUE
ARHGEF9	0.530241	0.429612	0.64602	0.665014	0.506042	NA	TRUE
ARID1A	118.705	-0.349455	0.300361	-1.16345	0.244647	0.388001	TRUE
ARID1B	105.321	0.400711	0.253488	1.58079	0.113926	0.220258	TRUE
ARID2	35.0374	-0.193049	0.265649	-0.726707	0.467406	0.604711	TRUE
ARID3A	12.7027	-2.34699	0.542404	-4.32702	1.51137e-05	0.000159854	TRUE
ARID3B	36.5547	-0.653992	0.28737	-2.27579	0.0228587	0.0649048	TRUE
ARID3C	0.489286	0.665178	0.591015	1.12548	0.260384	NA	TRUE
ARID4A	20.4944	-1.22013	0.430122	-2.8367	0.00455825	0.0179263	TRUE
ARID4B	0	NA	NA	NA	NA	NA	TRUE
ARID5A	155.638	-0.0686122	0.224016	-0.306283	0.759389	0.840197	TRUE
ARID5B	3.80031	0.0497754	0.682233	0.0729596	0.941838	0.965735	TRUE
ARIH1	111.937	0.0155997	0.227439	0.0685885	0.945317	0.968026	TRUE
ARIH2	121.116	0.168706	0.191717	0.879974	0.378873	0.520362	TRUE
ARL1	12.8609	-1.18914	0.419443	-2.83505	0.00458185	0.0179922	TRUE
ARL10	6.94156	0.0270749	0.460128	0.058842	0.953078	0.97169	TRUE
ARL11	57.2355	-0.529227	0.301594	-1.75477	0.079299	0.166853	TRUE
ARL13A	0.352321	-0.22622	0.533042	-0.424395	0.671278	NA	FALSE
ARL13B	1.96223	-0.576177	0.707652	-0.814209	0.415525	0.556498	TRUE
ARL14	0	NA	NA	NA	NA	NA	TRUE
ARL14EP	22.8147	-0.37985	0.295688	-1.28463	0.198921	0.332457	TRUE
ARL14EPL	0	NA	NA	NA	NA	NA	TRUE
ARL15	7.40438	-0.181645	0.515764	-0.352186	0.724699	0.814448	TRUE
ARL16	16.2062	0.507558	0.39627	1.28084	0.200251	0.334132	TRUE
ARL2	217.02	1.33828	0.330716	4.04662	5.19618e-05	0.000451501	TRUE
ARL2BP	117.4	0.326016	0.203205	1.60437	0.108633	0.212604	TRUE
ARL3	48.5939	1.3261	0.278145	4.76765	1.86384e-06	2.67143e-05	TRUE
ARL4A	18.5131	-0.0958948	0.350337	-0.273722	0.784298	0.858237	TRUE
ARL4C	89.9579	-0.0112351	0.210969	-0.0532546	0.957529	0.974219	TRUE
ARL4D	3.65499	0.410431	0.604995	0.678404	0.497516	0.632083	TRUE
ARL5A	12.8772	-0.0304093	0.452581	-0.0671908	0.94643	0.968453	TRUE
ARL5B	18.273	-0.233255	0.350097	-0.66626	0.505245	0.639186	TRUE
ARL5C	131.892	0.680047	0.174777	3.89093	9.98593e-05	0.000773957	FALSE
ARL6	0.267173	-0.213244	0.5941	-0.358937	0.719642	NA	TRUE
ARL6IP1	95.12	-0.132754	0.192397	-0.69	0.490194	0.625892	TRUE
ARL6IP4	107.461	1.05168	0.346707	3.03334	0.00241866	0.0106781	FALSE
ARL6IP5	60.1261	-0.60704	0.225246	-2.69501	0.00703875	0.0253931	TRUE
ARL6IP6	4.03981	-0.84396	0.64518	-1.3081	0.19084	0.322375	TRUE
ARL8A	94.7037	-0.293806	0.169405	-1.73434	0.0828583	0.172186	TRUE
ARL8B	73.0764	-0.953102	0.245471	-3.88274	0.000103285	0.000794982	TRUE
ARL9	0	NA	NA	NA	NA	NA	FALSE
ARMC1	19.4273	-0.235624	0.314443	-0.749337	0.453654	0.592556	TRUE
ARMC10	25.7343	-0.091609	0.280168	-0.326979	0.743684	0.828574	TRUE
ARMC12	0	NA	NA	NA	NA	NA	TRUE
ARMC2	2.48097	-0.503439	0.712343	-0.706737	0.47973	0.616831	TRUE
ARMC3	10.0882	-0.375688	0.523047	-0.718269	0.472591	0.609697	TRUE
ARMC4	0	NA	NA	NA	NA	NA	TRUE
ARMC5	124.933	0.225551	0.263241	0.856822	0.391543	0.532932	TRUE
ARMC6	4.59173	-0.276004	0.562978	-0.490258	0.623951	0.739308	TRUE
ARMC7	25.3805	-0.400729	0.319734	-1.25332	0.210089	0.346263	TRUE
ARMC8	20.1028	-0.75653	0.362003	-2.08985	0.0366316	0.0929735	TRUE
ARMC9	22.886	0.891873	0.296199	3.01106	0.00260338	0.0113225	TRUE
ARMCX1	0	NA	NA	NA	NA	NA	TRUE
ARMCX2	0.669048	0.731155	0.609054	1.20048	0.229954	NA	TRUE
ARMCX3	4.62251	-0.256569	0.562386	-0.456214	0.648236	0.757953	TRUE
ARMCX4	0	NA	NA	NA	NA	NA	TRUE
ARMCX6	4.4166	1.27514	0.562725	2.26602	0.0234503	0.0661864	TRUE
ARNT	38.174	0.467976	0.245044	1.90976	0.0561639	0.128703	TRUE
ARNT2	0.242109	-0.119406	0.524704	-0.227569	0.819981	NA	TRUE
ARNTL	8.49882	-1.02678	0.488442	-2.10215	0.0355404	0.0909754	TRUE
ARNTL2	0	NA	NA	NA	NA	NA	FALSE
ARPC1A	194.893	0.0297567	0.148334	0.200605	0.841007	0.899592	TRUE
ARPC1B	3863.18	0.288449	0.177458	1.62545	0.104067	0.205504	TRUE
ARPC2	3124.98	0.507553	0.293718	1.72803	0.0839827	0.173917	TRUE
ARPC3	519.045	0.254173	0.15845	1.60412	0.108687	0.212643	TRUE
ARPC4	756.279	0.791386	0.250265	3.16219	0.00156586	0.00742043	TRUE
ARPC5	318.793	-1.11226	0.179705	-6.18937	6.04044e-10	2.52076e-08	TRUE
ARPC5L	127.5	-0.0261626	0.15785	-0.165743	0.868359	0.916859	TRUE
ARPP19	48.4085	0.145003	0.287661	0.504077	0.614207	0.73149	TRUE
ARPP21	15.0284	1.32504	0.383843	3.45205	0.000556353	0.00320917	TRUE
ARR3	0.442774	-0.0949215	0.665192	-0.142698	0.886529	NA	FALSE
ARRB1	262.986	-0.732989	0.184516	-3.97249	7.11245e-05	0.000584478	TRUE
ARRB2	594.077	0.423652	0.206424	2.05233	0.0401373	0.0999674	TRUE
ARRDC1	136.286	-0.239438	0.176249	-1.35852	0.174298	0.301713	TRUE
ARRDC2	115.881	-0.257926	0.19075	-1.35217	0.176323	0.304048	TRUE
ARRDC3	65.2748	-1.6012	0.346792	-4.61719	3.88977e-06	4.99201e-05	TRUE
ARRDC4	6.08455	-0.911057	0.570341	-1.59739	0.110179	0.214945	TRUE
ARRDC5	0	NA	NA	NA	NA	NA	FALSE
ARSA	32.5247	-0.888713	0.302074	-2.94203	0.00326064	0.0135748	TRUE
ARSB	12.4942	-0.219504	0.406696	-0.539726	0.589386	0.711793	TRUE
ARSE	20.1481	0.0250685	0.297497	0.0842647	0.932846	0.960078	TRUE
ARSG	13.466	-0.167274	0.408763	-0.40922	0.682378	0.784272	TRUE
ARSI	10.7242	0.010052	0.613257	0.0163911	0.986922	0.991408	FALSE
ARSJ	0	NA	NA	NA	NA	NA	TRUE
ARSK	4.6636	-0.692901	0.56956	-1.21656	0.223773	0.363206	TRUE
ART1	0	NA	NA	NA	NA	NA	TRUE
ART2B	165.923	2.6154	0.194513	13.4459	3.25386e-41	9.98039e-38	FALSE
ART3	0.464987	-0.541698	0.652328	-0.830408	0.406308	NA	TRUE
ART4	99.3667	0.637564	0.415067	1.53605	0.124525	0.235772	TRUE
ART5	0	NA	NA	NA	NA	NA	TRUE
ARTN	0	NA	NA	NA	NA	NA	TRUE
ARV1	20.4566	0.58408	0.3169	1.8431	0.0653139	0.143892	TRUE
ARVCF	5.51658	-0.013103	0.498109	-0.0263055	0.979014	0.987053	TRUE
ARX	0	NA	NA	NA	NA	NA	TRUE
ARXES2	0	NA	NA	NA	NA	NA	FALSE
AS3MT	18.8138	0.476258	0.33828	1.40788	0.159166	0.282424	TRUE
ASAH1	56.2007	-2.42402	0.347692	-6.97174	3.13044e-12	2.56049e-10	TRUE
ASAH2	0.377053	0.0986827	0.619179	0.159377	0.873372	NA	TRUE
ASAP1	50.8634	-0.93587	0.35381	-2.64512	0.00816615	0.0286997	TRUE
ASAP2	16.2495	0.845415	0.383647	2.20363	0.0275506	0.0750484	TRUE
ASB1	1267.58	0.376399	0.341685	1.1016	0.270636	0.417147	TRUE
ASB10	0	NA	NA	NA	NA	NA	TRUE
ASB11	10.0624	0.730246	0.544417	1.34134	0.179812	0.308547	TRUE
ASB12	0	NA	NA	NA	NA	NA	TRUE
ASB13	11.3599	-0.224481	0.443049	-0.506672	0.612385	0.730019	TRUE
ASB14	0.925374	0.89615	0.711053	1.26031	0.207556	NA	TRUE
ASB15	0.880504	0.434406	0.660461	0.657731	0.510711	NA	TRUE
ASB16	0	NA	NA	NA	NA	NA	FALSE
ASB17	0	NA	NA	NA	NA	NA	FALSE
ASB18	0	NA	NA	NA	NA	NA	FALSE
ASB2	2.79305	-0.621234	0.642682	-0.966628	0.33373	0.478094	TRUE
ASB3	10.7194	-0.450412	0.423895	-1.06256	0.287983	0.434656	TRUE
ASB4	0	NA	NA	NA	NA	NA	FALSE
ASB5	0.194114	-0.081195	0.56657	-0.14331	0.886046	NA	FALSE
ASB6	41.4773	-0.478974	0.265004	-1.80742	0.0706962	0.152922	TRUE
ASB7	0.740297	-0.530143	0.70449	-0.752521	0.451738	NA	TRUE
ASB8	59.1074	0.0938118	0.192508	0.487314	0.626036	0.741107	TRUE
ASB9	0	NA	NA	NA	NA	NA	FALSE
ASCC1	103.866	0.969546	0.256573	3.77882	0.00015757	0.00113187	TRUE
ASCC2	132.075	0.674749	0.284941	2.36804	0.0178828	0.0534466	TRUE
ASCC3	35.2007	-0.891882	0.455846	-1.95654	0.0504013	0.11885	TRUE
ASCL1	0	NA	NA	NA	NA	NA	TRUE
ASCL2	3.43591	-0.110993	0.613197	-0.181006	0.856363	0.909121	TRUE
ASCL3	0.947152	-0.328857	0.715634	-0.459532	0.645852	NA	TRUE
ASCL4	1.81768	0.112059	0.706073	0.158708	0.873899	0.920386	FALSE
ASCL5	0	NA	NA	NA	NA	NA	FALSE
ASF1A	13.7444	0.056716	0.41605	0.13632	0.891568	0.932856	TRUE
ASF1B	7.38714	-0.879616	0.4873	-1.80508	0.0710623	0.153454	TRUE
ASGR1	1.95961	1.38788	0.680619	2.03915	0.0414352	0.10232	TRUE
ASGR2	2.22613	1.50967	0.704382	2.14326	0.0320926	0.0843857	TRUE
ASH1L	27.2625	-0.371821	0.489584	-0.759463	0.447576	0.58718	TRUE
ASH2L	53.6294	0.16391	0.234115	0.700124	0.48385	0.620049	TRUE
ASIC1	3.60885	0.266247	0.64503	0.412767	0.679778	0.781942	TRUE
ASIC2	0	NA	NA	NA	NA	NA	TRUE
ASIC3	0.0730593	0.0833984	0.522124	0.159729	0.873094	NA	TRUE
ASIC4	0.212356	-0.108893	0.524478	-0.207622	0.835524	NA	TRUE
ASIC5	0	NA	NA	NA	NA	NA	TRUE
ASIP	0.0278593	0.183262	0.520802	0.351885	0.724925	NA	FALSE
ASL	215.863	0.675278	0.292119	2.31166	0.0207966	0.0602378	TRUE
ASMT	0.517145	0.774988	0.647586	1.19673	0.23141	NA	FALSE
ASMTL	112.249	0.675165	0.270416	2.49676	0.0125333	0.0403386	TRUE
ASNA1	487.147	1.08513	0.293357	3.69902	0.000216437	0.00146954	TRUE
ASNS	232.754	0.20091	0.365747	0.549315	0.582789	0.706615	TRUE
ASNSD1	39.7625	0.313361	0.228236	1.37297	0.169761	0.296315	TRUE
ASPA	1.68506	-2.02786	0.712055	-2.84789	0.00440096	0.0173842	TRUE
ASPDH	0.318976	0.407511	0.522269	0.780271	0.435232	NA	TRUE
ASPG	1.72046	0.930901	0.7084	1.31409	0.188816	0.320058	TRUE
ASPH	19.0835	-1.53954	0.518599	-2.96865	0.00299112	0.0126371	TRUE
ASPHD1	0.0278593	0.183262	0.520802	0.351885	0.724925	NA	TRUE
ASPHD2	0	NA	NA	NA	NA	NA	TRUE
ASPM	3.54193	-0.55359	0.576212	-0.96074	0.336683	0.48096	TRUE
ASPN	0	NA	NA	NA	NA	NA	TRUE
ASPSCR1	223.114	0.939716	0.278922	3.3691	0.000754144	0.00411409	TRUE
ASRGL1	6.21963	0.408019	0.530385	0.769287	0.441723	0.581491	TRUE
ASS1	29.6359	1.8578	0.525517	3.53518	0.000407493	0.00248116	TRUE
ASTE1	6.12745	0.102883	0.54923	0.187322	0.851408	0.906677	TRUE
ASTL	0.574295	-0.781061	0.69613	-1.122	0.26186	NA	TRUE
ASTN1	17.927	0.379161	0.455796	0.831865	0.405485	0.547052	TRUE
ASTN2	0.210798	0.342526	0.520932	0.657525	0.510843	NA	TRUE
ASUN	22.3081	-0.654474	0.376584	-1.73792	0.0822244	0.171159	TRUE
ASXL1	100.279	-0.124339	0.196804	-0.631793	0.527522	0.659117	TRUE
ASXL2	15.6464	-0.821575	0.38748	-2.1203	0.0339806	0.088104	TRUE
ASZ1	0	NA	NA	NA	NA	NA	TRUE
ATAD1	16.3792	-1.4832	0.419345	-3.53694	0.000404792	0.00246961	TRUE
ATAD2	7.63597	-0.470384	0.535054	-0.879134	0.379329	0.520929	TRUE
ATAD2B	2.20385	-0.592659	0.654301	-0.90579	0.365047	0.507049	TRUE
ATAD3A	44.5446	0.865705	0.213424	4.05627	4.98636e-05	0.000435738	TRUE
ATAD5	1.11768	-0.704703	0.716731	-0.983218	0.3255	0.47029	TRUE
ATAT1	5.09289	-0.129034	0.578876	-0.222904	0.82361	0.886548	TRUE
ATCAY	3.58938	-0.818774	0.668014	-1.22568	0.220318	0.358884	TRUE
ATE1	23.2309	-1.01303	0.373236	-2.71418	0.00664408	0.0242861	TRUE
ATF1	13.9093	-0.33925	0.463653	-0.731691	0.464357	0.602305	TRUE
ATF2	7.02646	0.278383	0.565463	0.49231	0.6225	0.738275	TRUE
ATF3	9.96765	-0.611921	0.447637	-1.367	0.171624	0.298167	TRUE
ATF4	293.273	0.116185	0.224234	0.518141	0.60436	0.723213	TRUE
ATF5	172.041	1.02536	0.330976	3.09801	0.00194827	0.00890588	TRUE
ATF6	93.6457	-0.641152	0.190193	-3.37105	0.000748815	0.00409048	TRUE
ATF6B	212.439	0.0500514	0.161563	0.309796	0.756716	0.838147	TRUE
ATF7	69.6602	-0.035134	0.194847	-0.180316	0.856905	0.909517	TRUE
ATF7IP	137.546	-0.680931	0.195998	-3.47418	0.000512418	0.00299089	TRUE
ATF7IP2	0	NA	NA	NA	NA	NA	TRUE
ATG10	7.35859	0.0327625	0.490704	0.0667663	0.946768	0.968637	TRUE
ATG12	69.4665	-0.626461	0.2224	-2.81682	0.00485018	0.0188253	TRUE
ATG13	31.5242	-0.396799	0.358585	-1.10657	0.26848	0.414807	TRUE
ATG14	8.75635	-1.52798	0.519101	-2.94351	0.00324517	0.0135241	TRUE
ATG16L1	47.4962	-0.738831	0.249397	-2.96246	0.00305187	0.0128539	TRUE
ATG16L2	34.8057	-0.911776	0.27951	-3.26205	0.00110608	0.00560071	TRUE
ATG2A	226.706	0.184549	0.164966	1.11871	0.263264	0.408445	TRUE
ATG3	124.995	-0.490533	0.199628	-2.45724	0.0140009	0.0439665	TRUE
ATG4A	0.506571	0.221527	0.637903	0.347274	0.728385	NA	TRUE
ATG4AL1	3.81567	-0.0440881	0.604769	-0.0729007	0.941885	0.965735	FALSE
ATG4B	84.123	0.406983	0.214662	1.89592	0.0579702	0.131892	TRUE
ATG4C	3.92228	-0.443735	0.651074	-0.681543	0.495528	0.630641	TRUE
ATG4D	171.714	-0.616853	0.273934	-2.25183	0.0243328	0.0680974	TRUE
ATG5	36.3244	-0.214545	0.260251	-0.824378	0.409725	0.551439	TRUE
ATG7	63.0241	-0.868144	0.295322	-2.93965	0.00328586	0.0136446	TRUE
ATG9A	172.393	-0.250191	0.140003	-1.78705	0.0739298	0.157912	TRUE
ATG9B	0	NA	NA	NA	NA	NA	TRUE
ATHL1	217.906	-0.0443645	0.152692	-0.290548	0.771397	0.848585	TRUE
ATIC	31.7987	-1.32313	0.31221	-4.23795	2.25565e-05	0.000225547	TRUE
ATL1	0.571167	-0.264909	0.685446	-0.386477	0.699143	NA	TRUE
ATL2	9.12895	-0.48208	0.511914	-0.941722	0.346335	0.489425	TRUE
ATL3	11.1816	-0.597568	0.436488	-1.36904	0.170987	0.297651	TRUE
ATM	27.664	-0.403966	0.342843	-1.17828	0.238685	0.381008	TRUE
ATMIN	28.3914	-0.6146	0.278335	-2.20813	0.0272355	0.0744379	TRUE
ATN1	0	NA	NA	NA	NA	NA	TRUE
ATOH1	0	NA	NA	NA	NA	NA	TRUE
ATOH7	0	NA	NA	NA	NA	NA	TRUE
ATOH8	0.159488	0.342526	0.520932	0.657525	0.510843	NA	TRUE
ATOX1	547.112	1.90506	0.265704	7.16986	7.50756e-13	7.31034e-11	TRUE
ATP10A	16.2206	-1.4388	0.445486	-3.22973	0.00123907	0.00613236	TRUE
ATP10B	0	NA	NA	NA	NA	NA	TRUE
ATP10D	27.5932	-1.19978	0.291256	-4.11933	3.79969e-05	0.000348418	TRUE
ATP11A	40.3557	-1.33029	0.369522	-3.60004	0.000318166	0.00202783	TRUE
ATP11B	91.4022	-1.22081	0.257316	-4.74438	2.09141e-06	2.95958e-05	TRUE
ATP11C	5.29375	-0.269253	0.674545	-0.399162	0.689774	0.789812	TRUE
ATP12A	0	NA	NA	NA	NA	NA	TRUE
ATP13A1	255.214	-0.326133	0.187988	-1.73486	0.0827662	0.172024	TRUE
ATP13A2	582.945	-0.667755	0.224096	-2.97978	0.0028846	0.0123185	TRUE
ATP13A3	0.288266	0.12987	0.608936	0.213274	0.831113	NA	TRUE
ATP13A4	0.252683	0.196628	0.522743	0.376146	0.706808	NA	TRUE
ATP13A5	0.159488	0.342526	0.520932	0.657525	0.510843	NA	TRUE
ATP1A1	616.215	-1.23685	0.153049	-8.08139	6.40305e-16	1.4548e-13	TRUE
ATP1A2	3.91021	-1.15999	0.716409	-1.61917	NA	NA	FALSE
ATP1A3	190.212	-0.361118	0.23948	-1.50792	0.131574	0.245879	TRUE
ATP1A4	0.727319	-0.0816683	0.64665	-0.126294	0.899499	NA	TRUE
ATP1B1	5.66333	-1.15176	0.576276	-1.99862	0.0456496	0.11038	TRUE
ATP1B2	3.90304	-0.00791384	0.685913	-0.0115377	0.990794	0.993954	TRUE
ATP1B3	223.335	-0.922464	0.157967	-5.83958	5.23318e-09	1.6463e-07	TRUE
ATP1B4	0.348622	-0.21652	0.530783	-0.407926	0.683328	NA	TRUE
ATP2A1	13.4164	0.414447	0.40183	1.0314	0.302355	0.449647	TRUE
ATP2A2	81.9413	-0.368926	0.268625	-1.37339	0.169632	0.296175	TRUE
ATP2A3	1007.48	0.648605	0.201114	3.22507	0.00125943	0.00620811	TRUE
ATP2B1	45.8837	-1.30202	0.313865	-4.14834	3.34888e-05	0.000313645	TRUE
ATP2B2	0.67428	0.678981	0.65975	1.02915	0.30341	NA	TRUE
ATP2B3	0	NA	NA	NA	NA	NA	TRUE
ATP2B4	10.7979	-1.67552	0.597333	-2.80499	0.00503176	0.0194321	TRUE
ATP2C1	46.8071	-0.890005	0.434095	-2.05025	0.0403396	0.100269	TRUE
ATP2C2	0	NA	NA	NA	NA	NA	TRUE
ATP4A	0	NA	NA	NA	NA	NA	FALSE
ATP4B	0	NA	NA	NA	NA	NA	FALSE
ATP5A1	814.361	0.535917	0.164898	3.24999	0.00115409	0.00580786	TRUE
ATP5B	3735.15	1.09001	0.227281	4.79588	1.61966e-06	2.39705e-05	TRUE
ATP5C1	245.137	0.393176	0.183677	2.14059	0.0323071	0.0847681	TRUE
ATP5D	377.451	1.14896	0.298919	3.84371	0.000121187	0.000908274	TRUE
ATP5E	362.344	1.46001	0.319135	4.5749	4.7645e-06	5.98318e-05	TRUE
ATP5F1	0.600101	0.27998	0.680537	0.41141	0.680772	NA	TRUE
ATP5G1	84.7213	1.65782	0.31522	5.25924	1.44652e-07	2.98869e-06	FALSE
ATP5G2	339.306	0.961672	0.231387	4.15612	3.23692e-05	0.000304787	TRUE
ATP5G3	217.473	0.705494	0.221083	3.19109	0.00141739	0.00682762	TRUE
ATP5H	572.138	1.22513	0.244523	5.01027	5.43537e-07	9.44568e-06	FALSE
ATP5HL1	0.410011	0.530024	0.574259	0.92297	0.356023	NA	FALSE
ATP5I	140.386	1.23775	0.248047	4.99	6.03789e-07	1.03318e-05	TRUE
ATP5J	172.888	0.67791	0.233089	2.90838	0.0036331	0.0148334	TRUE
ATP5J2	292.661	0.843698	0.231504	3.64442	0.000267995	0.00175924	TRUE
ATP5L	681.185	1.30304	0.190492	6.84035	7.89987e-12	5.73512e-10	TRUE
ATP5O	258.133	1.06107	0.238012	4.45805	8.271e-06	9.59139e-05	TRUE
ATP5S	8.23033	0.70836	0.467468	1.51531	0.129693	0.243229	TRUE
ATP5SL	81.0398	0.506714	0.199522	2.53964	0.0110968	0.0365985	TRUE
ATP6AP1	199.613	-0.704114	0.171714	-4.1005	4.12264e-05	0.000371835	TRUE
ATP6AP1L	88.8118	0.10377	0.436701	0.237622	0.812174	0.878477	TRUE
ATP6AP2	15.1862	-2.20678	0.583642	-3.78104	0.000156172	0.00112252	TRUE
ATP6V0A1	166.065	-0.102379	0.17705	-0.578247	0.563098	0.689761	TRUE
ATP6V0A2	13.0168	-0.997597	0.394971	-2.52575	0.0115453	0.0378336	TRUE
ATP6V0A4	0.21795	-0.0987816	0.524314	-0.188402	0.850562	NA	TRUE
ATP6V0B	64.0153	-0.169309	0.20066	-0.843759	0.398804	0.5405	TRUE
ATP6V0C	883.474	0.450109	0.166981	2.69558	0.00702666	0.0253783	TRUE
ATP6V0D1	443.002	0.576461	0.19632	2.93634	0.00332111	0.0137704	TRUE
ATP6V0D2	0	NA	NA	NA	NA	NA	TRUE
ATP6V0E1	354.657	0.757131	0.138753	5.45668	4.85118e-08	1.16248e-06	TRUE
ATP6V0E2	11.0912	-0.443298	0.447	-0.991719	0.321335	0.465567	TRUE
ATP6V1A	49.6673	-1.13212	0.266314	-4.25106	2.12759e-05	0.000214843	TRUE
ATP6V1B1	0	NA	NA	NA	NA	NA	TRUE
ATP6V1B2	145.411	-1.06074	0.262958	-4.03387	5.48662e-05	0.000471718	TRUE
ATP6V1C1	65.9328	-1.10677	0.232031	-4.76991	1.84312e-06	2.64792e-05	TRUE
ATP6V1C2	1.38554	0.886513	0.710851	1.24711	0.212356	0.349014	TRUE
ATP6V1D	46.6093	-0.908137	0.256953	-3.53426	0.000408925	0.0024874	TRUE
ATP6V1E1	86.2402	-0.546499	0.175078	-3.12146	0.00179958	0.00834654	TRUE
ATP6V1E2	0.221973	-0.14104	0.584365	-0.241355	0.80928	NA	FALSE
ATP6V1F	309.083	1.20092	0.283572	4.23498	2.28568e-05	0.000228178	FALSE
ATP6V1G1	255.004	-0.204288	0.20848	-0.979892	0.327139	0.471975	TRUE
ATP6V1G2	0.254931	0.204965	0.522654	0.392163	0.694938	NA	TRUE
ATP6V1G3	1.95092	0.0415871	0.696169	0.0597371	0.952365	0.971124	TRUE
ATP6V1H	46.3696	-0.70489	0.237097	-2.973	0.00294904	0.0125067	TRUE
ATP7A	11.2541	-1.21201	0.516001	-2.34886	0.0188312	0.0556093	TRUE
ATP7B	9.05442	0.332917	0.547257	0.608337	0.542964	0.672688	TRUE
ATP8A1	97.5949	0.815194	0.27275	2.9888	0.00280075	0.0120023	TRUE
ATP8B1	0.587851	0.265045	0.647156	0.409553	0.682134	NA	TRUE
ATP8B2	147.979	-0.148066	0.21808	-0.67895	0.497169	0.631773	TRUE
ATP8B3	0.506323	0.558311	0.583271	0.957207	0.338463	NA	TRUE
ATP8B4	77.1982	-2.1109	0.293173	-7.20019	6.0128e-13	6.14758e-11	TRUE
ATP8B5P	2.2268	-0.425546	0.67865	-0.627047	0.530629	0.66195	FALSE
ATP9A	2.23755	-0.243621	0.696683	-0.349688	0.726573	0.816194	TRUE
ATP9B	22.2562	-1.24409	0.34098	-3.64859	0.000263688	0.00173282	TRUE
ATPAF1	24.2589	0.372073	0.283567	1.31212	0.189481	0.320871	TRUE
ATPAF2	22.038	0.556205	0.352787	1.57661	0.114886	0.221722	TRUE
ATPIF1	1607.29	1.02571	0.217573	4.71432	2.42524e-06	3.34329e-05	TRUE
ATR	9.84949	-0.491604	0.411351	-1.1951	0.232049	0.373134	TRUE
ATRAID	25.1363	0.355199	0.390229	0.910233	0.3627	0.505217	TRUE
ATRIP	25.7691	0.979589	0.393134	2.49174	0.0127118	0.040792	TRUE
ATRN	27.9249	-1.56024	0.467158	-3.33985	0.000838248	0.0044793	TRUE
ATRNL1	11.0168	-0.460689	0.451242	-1.02094	0.307285	0.452535	TRUE
ATRX	23.4055	-0.824757	0.380836	-2.16565	0.0303382	0.080882	TRUE
ATXN1	0.865432	0.201008	0.710377	0.282959	0.777208	NA	TRUE
ATXN10	110.242	0.85478	0.244851	3.49103	0.00048117	0.00285192	TRUE
ATXN1L	55.3572	0.490703	0.238398	2.05833	0.0395581	0.0988671	TRUE
ATXN2	15.1711	-0.362876	0.346776	-1.04643	0.295364	0.442955	TRUE
ATXN2L	160.987	-0.911659	0.193115	-4.72081	2.34908e-06	3.26028e-05	TRUE
ATXN3	22.8175	-0.730369	0.357035	-2.04565	0.0407906	0.101103	TRUE
ATXN7	10.2549	-0.710061	0.478682	-1.48337	0.137977	0.25451	TRUE
ATXN7L2	25.3422	0.606682	0.300089	2.02168	0.0432098	0.105711	TRUE
ATXN7L3	80.7203	-0.632605	0.228137	-2.77291	0.00555575	0.0210511	TRUE
ATXN7L3B	51.8957	-0.651336	0.288156	-2.26036	0.0237988	0.0668738	TRUE
ATXN7L4	37.2146	-0.0870631	0.314318	-0.27699	0.781788	0.856285	FALSE
AUH	82.7068	0.825273	0.24269	3.40052	0.000672572	0.00375423	TRUE
AUNIP	0.311145	-0.260707	0.604676	-0.431151	0.666359	NA	FALSE
AUP1	1161.76	1.2437	0.277024	4.48949	7.13953e-06	8.44695e-05	TRUE
AURKA	33.6553	-0.29546	0.273638	-1.07975	0.280253	0.427346	TRUE
AURKAIP1	160.884	1.06207	0.255404	4.1584	3.20478e-05	0.00030269	TRUE
AURKB	11.3672	-0.294897	0.450924	-0.653983	0.513123	0.646195	TRUE
AURKC	6.35363	0.264684	0.499722	0.529663	0.596345	0.716748	FALSE
AVEN	31.8106	1.12579	0.335708	3.35349	0.00079799	0.00430164	TRUE
AVGR1	0	NA	NA	NA	NA	NA	FALSE
AVIL	4.03786	0.969396	0.606021	1.59961	0.109686	0.214153	TRUE
AVL9	11.5928	-0.780501	0.522473	-1.49386	0.135212	0.250819	TRUE
AVP	0	NA	NA	NA	NA	NA	FALSE
AVPI1	16.8907	0.655337	0.450751	1.45388	0.14598	0.264822	TRUE
AVPR1A	0.581085	0.701887	0.601318	1.16725	0.24311	NA	TRUE
AVPR1B	0	NA	NA	NA	NA	NA	FALSE
AVPR2	2.39339	-0.00402025	0.679892	-0.00591308	0.995282	0.997407	TRUE
AWAT1	0	NA	NA	NA	NA	NA	TRUE
AWAT2	0	NA	NA	NA	NA	NA	TRUE
AXIN1	106.05	-0.0592638	0.185841	-0.318896	0.749805	0.833146	TRUE
AXIN2	9.14808	-0.751547	0.487556	-1.54146	0.123205	0.233669	TRUE
AXL	0.227072	0.264405	0.521969	0.506552	0.612469	NA	TRUE
AZGP1	10.6926	0.565541	0.548626	1.03083	0.30262	0.449845	TRUE
AZI1	38.4365	0.37151	0.34809	1.06728	0.285844	0.433127	TRUE
AZI2	43.3264	-0.616687	0.275446	-2.23887	0.0251643	0.0699616	TRUE
AZIN1	42.3781	-1.51844	0.338044	-4.49184	7.06102e-06	8.37021e-05	TRUE
B2M	19219.5	0.726249	0.167248	4.34234	1.40972e-05	0.000151055	TRUE
B3GALNT1	0.7019	-0.381092	0.642366	-0.593263	0.553005	NA	TRUE
B3GALNT2	17.4945	-0.258612	0.381959	-0.677066	0.498364	0.632701	TRUE
B3GALT1	0.159488	0.342526	0.520932	0.657525	0.510843	NA	TRUE
B3GALT2	0.0278593	0.183262	0.520802	0.351885	0.724925	NA	TRUE
B3GALT4	38.4333	0.421804	0.298455	1.41329	0.15757	0.280502	FALSE
B3GALT5	0.96077	1.14366	0.702082	1.62896	0.103321	NA	TRUE
B3GALT6	2.12329	-0.765298	0.676561	-1.13116	0.257989	0.402705	TRUE
B3GALTL	6.63344	-0.688462	0.532474	-1.29295	0.196029	0.328832	TRUE
B3GAT1	0	NA	NA	NA	NA	NA	TRUE
B3GAT2	0.398146	0.57701	0.629686	0.916346	0.359485	NA	TRUE
B3GAT3	400.097	1.23988	0.226748	5.4681	4.54882e-08	1.09861e-06	TRUE
B3GNT1	0	NA	NA	NA	NA	NA	TRUE
B3GNT2	32.5967	-0.621829	0.42554	-1.46127	0.143941	0.262137	TRUE
B3GNT3	14.2728	-1.23302	0.413016	-2.98541	0.00283197	0.0121275	TRUE
B3GNT4	0	NA	NA	NA	NA	NA	FALSE
B3GNT5	17.5501	-0.596133	0.393355	-1.51551	0.129644	0.243174	TRUE
B3GNT6	0.681536	-0.481104	0.697795	-0.689464	0.490532	NA	TRUE
B3GNT7	20.3307	-1.10552	0.47636	-2.32077	0.0202994	0.0590454	TRUE
B3GNT8	6.16856	0.127044	0.499121	0.254536	0.799082	0.868842	TRUE
B3GNT9	18.8583	-0.202075	0.392388	-0.514988	0.606562	0.725049	TRUE
B3GNTL1	2.97296	-1.6557	0.65952	-2.51046	0.0120575	0.0390754	TRUE
B4GALNT1	178.83	0.545268	0.279927	1.94789	0.0514275	0.120585	TRUE
B4GALNT3	0.166255	-0.0232966	0.523264	-0.0445218	0.964488	NA	TRUE
B4GALNT4	1.57133	0.0175901	0.716593	0.0245469	0.980416	0.987499	TRUE
B4GALT1	24.3341	-0.461754	0.326855	-1.41272	0.157739	0.280641	TRUE
B4GALT2	1.80501	1.28726	0.6996	1.84	0.0657686	0.144738	TRUE
B4GALT3	57.7487	-0.506084	0.259489	-1.95031	0.0511386	0.120126	TRUE
B4GALT4	0.297828	-0.180366	0.528396	-0.341346	0.732843	NA	TRUE
B4GALT5	91.6617	-1.96468	0.309186	-6.35436	2.0929e-10	9.68974e-09	TRUE
B4GALT6	17.5667	-0.869081	0.341381	-2.54578	0.0109035	0.0361651	TRUE
B4GALT7	45.4729	0.140069	0.244659	0.572506	0.566979	0.69327	TRUE
B9D1	0	NA	NA	NA	NA	NA	TRUE
B9D2	40.3881	0.648224	0.338495	1.91502	0.0554902	0.127397	TRUE
BAALC	0	NA	NA	NA	NA	NA	TRUE
BAAT	6.53297	0.545901	0.548559	0.995154	0.319661	0.463766	TRUE
BABAM1	183.428	1.23349	0.236889	5.20704	1.91881e-07	3.85302e-06	TRUE
BACE1	2.87826	-0.175009	0.628149	-0.27861	0.780544	0.855197	TRUE
BACE2	0.600723	0.504088	0.651531	0.773698	0.439109	NA	TRUE
BACH1	19.3292	0.501305	0.322947	1.55228	0.120595	0.230117	TRUE
BAD	25.7061	0.185482	0.320951	0.577913	0.563323	0.689968	TRUE
BAG1	112.856	0.469115	0.225682	2.07865	0.0376493	0.0950647	TRUE
BAG2	0.581685	-0.303331	0.694173	-0.436967	0.662135	NA	TRUE
BAG3	47.4105	1.37049	0.22889	5.98754	2.13038e-09	7.59816e-08	TRUE
BAG4	1.86003	-1.25968	0.697207	-1.80675	0.070802	0.153094	TRUE
BAG5	32.6879	-0.0844367	0.263538	-0.320397	0.748667	0.832354	TRUE
BAG6	1241.74	0.927151	0.272769	3.39903	0.000676243	0.00376957	TRUE
BAHCC1	1.10435	-0.750037	0.679372	-1.10402	0.269586	0.416149	TRUE
BAHD1	38.0556	-0.846871	0.317219	-2.66967	0.00759255	0.0270244	TRUE
BAI1	0	NA	NA	NA	NA	NA	TRUE
BAI2	0.227072	0.264405	0.521969	0.506552	0.612469	NA	TRUE
BAI3	0	NA	NA	NA	NA	NA	TRUE
BAIAP2	31.4131	-0.23589	0.320825	-0.735262	0.46218	0.600369	TRUE
BAIAP2L1	5.42494	-0.2194	0.583269	-0.376157	0.706801	0.802196	TRUE
BAIAP2L2	6.6439	-0.369633	0.58059	-0.636652	0.524352	0.656322	TRUE
BAK1	191.229	0.508939	0.24062	2.11511	0.0344203	0.0889057	TRUE
BAMBI	0.501968	-0.174861	0.644078	-0.27149	0.786014	NA	FALSE
BANF1	180.208	1.05876	0.240685	4.39895	1.08775e-05	0.000121323	TRUE
BANF2	0	NA	NA	NA	NA	NA	FALSE
BANK1	46.2474	-0.754482	0.263314	-2.86533	0.00416571	0.0165939	TRUE
BANP	42.2226	-0.307868	0.245941	-1.2518	0.210644	0.346851	TRUE
BAP1	151.957	-2.07279	0.315244	-6.57519	4.85904e-11	2.92233e-09	TRUE
BARD1	2.65919	-0.0847163	0.686778	-0.123353	0.901827	0.940016	TRUE
BARHL1	0.27531	0.27519	0.530287	0.518946	0.603799	NA	FALSE
BARHL2	0	NA	NA	NA	NA	NA	TRUE
BARX1	0	NA	NA	NA	NA	NA	TRUE
BARX2	0	NA	NA	NA	NA	NA	TRUE
BASP1	8.44157	-0.577544	0.499297	-1.15672	0.247389	0.391085	TRUE
BATF	37.3616	0.752932	0.327014	2.30244	0.0213103	0.0614159	TRUE
BATF2	0.506658	-0.110925	0.624559	-0.177606	0.859032	NA	TRUE
BATF3	2.21155	0.668678	0.701887	0.952686	0.340749	0.484737	TRUE
BAX	78.741	0.877769	0.244634	3.58809	0.000333115	0.00210857	TRUE
BAZ1A	26.8327	-1.74109	0.43551	-3.99781	6.39306e-05	0.000535768	TRUE
BAZ1B	84.4739	-0.604836	0.22895	-2.64178	0.0082471	0.0288849	TRUE
BAZ2A	45.0175	-0.677559	0.350615	-1.93249	0.0532994	0.123897	TRUE
BAZ2B	8.52727	-0.912023	0.516099	-1.76715	0.0772033	0.16334	TRUE
BBC3	53.0046	0.014561	0.211843	0.0687349	0.945201	0.968026	TRUE
BBOX1	0.529774	0.682773	0.59604	1.14552	0.251995	NA	TRUE
BBS1	2.37339	-0.915271	0.666578	-1.37309	0.169725	0.296294	TRUE
BBS10	7.14103	0.0030302	0.522752	0.00579664	0.995375	0.997407	TRUE
BBS12	2.29947	-1.21753	0.697405	-1.7458	0.0808465	0.169181	TRUE
BBS2	10.6783	-0.285012	0.471914	-0.603949	0.545878	0.674798	TRUE
BBS4	23.7594	-0.623019	0.387131	-1.60932	0.107546	0.211015	TRUE
BBS5	0.877513	0.0822062	0.714136	0.115113	0.908356	NA	TRUE
BBS7	1.91846	-0.444209	0.687708	-0.645927	0.518327	0.651028	TRUE
BBS9	45.1703	1.07852	0.285059	3.78348	0.000154649	0.00111415	TRUE
BBX	3.52595	1.24802	0.656548	1.90088	0.0573177	0.130809	TRUE
BCAM	2.08867	0.889785	0.684082	1.3007	0.193362	0.32556	TRUE
BCAN	0	NA	NA	NA	NA	NA	TRUE
BCAP29	26.8581	-0.922726	0.366985	-2.51435	0.0119253	0.0388198	TRUE
BCAP31	579.272	1.04064	0.16342	6.36786	1.91678e-10	9.01034e-09	TRUE
BCAR1	2.26278	1.86404	0.716147	2.60287	0.00924473	0.0316559	TRUE
BCAR3	6.37194	-0.951621	0.542084	-1.75549	0.0791761	0.16668	TRUE
BCAS1	0	NA	NA	NA	NA	NA	TRUE
BCAS2	1257.11	-0.0971708	0.317626	-0.305928	0.759659	0.840398	TRUE
BCAS3	237.666	1.27414	0.232741	5.4745	4.38739e-08	1.06381e-06	TRUE
BCAT1	52.4997	-1.35413	0.26634	-5.08422	3.69132e-07	6.81034e-06	TRUE
BCAT2	69.8001	1.01166	0.273065	3.70482	0.00021154	0.00144108	FALSE
BCCIP	18.1501	-0.699073	0.36186	-1.93189	0.0533729	0.123974	TRUE
BCDIN3D	12.9425	0.857808	0.442945	1.9366	0.0527939	0.123095	TRUE
BCHE	0.210798	0.342526	0.520932	0.657525	0.510843	NA	TRUE
BCKDHA	140.859	1.31378	0.276099	4.75836	1.95169e-06	2.7811e-05	TRUE
BCKDHB	38.2069	0.714471	0.299259	2.38747	0.0169648	0.0511402	TRUE
BCKDK	89.6097	0.37059	0.222383	1.66645	0.0956233	0.192076	TRUE
BCL10	34.8305	-1.08329	0.277066	-3.90986	9.23492e-05	0.000725373	TRUE
BCL11A	13.8166	-0.131101	0.370348	-0.353996	0.723342	0.81352	TRUE
BCL11B	24.0715	0.386009	0.338312	1.14098	0.253876	0.398517	TRUE
BCL2	3.62547	0.646723	0.617444	1.04742	0.294906	0.442485	TRUE
BCL2A1	111.606	-1.08106	0.180801	-5.97928	2.24124e-09	7.85737e-08	FALSE
BCL2L1	139.898	-0.783376	0.393706	-1.98975	0.0466189	0.112106	TRUE
BCL2L10	0	NA	NA	NA	NA	NA	FALSE
BCL2L11	0.367436	0.0777401	0.628308	0.123729	0.90153	NA	TRUE
BCL2L12	36.4406	0.217376	0.386687	0.562151	0.574013	0.699083	TRUE
BCL2L13	101.738	-0.607305	0.333032	-1.82356	0.0682185	0.148742	TRUE
BCL2L14	3.08373	0.556288	0.677161	0.8215	0.411362	0.552914	TRUE
BCL2L15	3.78425	0.967025	0.612709	1.57828	0.114502	0.221197	TRUE
BCL2L2	4.46749	-0.312084	0.599708	-0.520392	0.60279	0.722087	FALSE
BCL3	26.2704	-1.19391	0.32842	-3.63533	0.000277629	0.00181376	TRUE
BCL6	71.5648	-2.39221	0.312201	-7.66241	1.82472e-14	2.83386e-12	TRUE
BCL6B	2.05733	0.124307	0.682765	0.182063	0.855533	0.908838	TRUE
BCL7B	83.0617	0.540202	0.175458	3.0788	0.00207833	0.00940957	TRUE
BCL7C	58.8356	0.961446	0.348213	2.76109	0.00576091	0.0216437	TRUE
BCL9	5.90863	-0.812307	0.540574	-1.50267	0.132923	0.247547	TRUE
BCL9L	49.5092	-0.150225	0.240682	-0.624164	0.53252	0.663703	TRUE
BCLAF1	77.9072	-0.940789	0.248496	-3.78593	0.000153136	0.00110389	TRUE
BCMO1	11.2357	0.611187	0.440986	1.38596	0.165761	0.290905	TRUE
BCO2	4.07051	-0.0966612	0.638392	-0.151414	0.879649	0.924626	TRUE
BCOR	38.5843	-1.3488	0.263675	-5.11538	3.13116e-07	5.86416e-06	TRUE
BCORL1	186.953	-0.106237	0.127746	-0.831624	0.405621	0.547069	TRUE
BCR	13.3822	0.129199	0.382231	0.338013	0.735353	0.822279	TRUE
BCS1L	5.6312	0.287923	0.556637	0.517255	0.604978	0.723579	TRUE
BDH1	46.5046	0.328316	0.258246	1.27133	0.20361	0.338357	TRUE
BDH2	3.06275	1.84174	0.630047	2.92317	0.00346484	0.0142747	TRUE
BDKRB1	0	NA	NA	NA	NA	NA	FALSE
BDKRB2	0	NA	NA	NA	NA	NA	TRUE
BDNF	0.162231	-0.0143747	0.523178	-0.0274757	0.97808	NA	TRUE
BDP1	0.441151	-0.481368	0.636096	-0.756754	0.449197	NA	TRUE
BEAN1	0.917625	0.905313	0.711127	1.27307	0.202994	NA	TRUE
BECN1	59.6955	-0.625751	0.322809	-1.93845	0.0525678	0.122638	TRUE
BEGAIN	21.244	0.104444	0.606384	0.172241	NA	NA	TRUE
BEND3	3.41572	0.189481	0.607642	0.31183	0.75517	0.83719	TRUE
BEND4	0.128778	-0.00749348	0.523111	-0.0143248	0.988571	NA	TRUE
BEND5	12.7924	0.802344	0.380287	2.10984	0.0348724	0.089809	TRUE
BEND6	0.398746	-0.430624	0.63873	-0.674188	0.500192	NA	TRUE
BEND7	0	NA	NA	NA	NA	NA	TRUE
BEST1	37.7654	2.4217	0.326783	7.41073	1.25602e-13	1.62212e-11	TRUE
BEST2	0.321719	0.0724351	0.534923	0.135412	0.892286	NA	TRUE
BEST3	0.402857	0.31155	0.558169	0.558165	0.576732	NA	TRUE
BEST4	0	NA	NA	NA	NA	NA	FALSE
BET1	13.3983	-0.0809919	0.498791	-0.162377	0.871009	0.918471	TRUE
BET1L	47.97	-0.330062	0.236689	-1.39449	0.163169	0.287816	TRUE
BEX1	0.514792	0.370356	0.590133	0.627581	0.530279	NA	FALSE
BEX2	0.546048	0.783169	0.649506	1.20579	0.227898	NA	TRUE
BEX4	0.477972	-0.120254	0.677018	-0.177623	0.859019	NA	FALSE
BFAR	10.5435	-2.18363	0.496156	-4.40109	1.07706e-05	0.000120791	TRUE
BFSP1	1.91123	-0.775442	0.694174	-1.11707	0.263964	0.409273	TRUE
BFSP2	32.457	1.79139	0.338273	5.29569	1.1857e-07	2.50816e-06	TRUE
BGLAP	17.8902	1.80212	0.650697	2.76953	0.00561381	0.0212318	TRUE
BGN	377.273	1.69965	0.282852	6.00898	1.8669e-09	6.85777e-08	TRUE
BHLHA15	1.59856	-0.25433	0.69768	-0.364538	0.715457	0.808655	TRUE
BHLHA9	0	NA	NA	NA	NA	NA	TRUE
BHLHB9	3.50259	-0.0945869	0.685553	-0.137972	0.890263	0.93207	TRUE
BHLHE22	2.96957	-0.0586221	0.662199	-0.0885265	0.929458	0.958049	TRUE
BHLHE23	0.0931953	0.13196	0.521515	0.253032	0.800243	NA	FALSE
BHLHE40	30.7503	-2.19439	0.368903	-5.94843	2.70718e-09	9.25193e-08	TRUE
BHLHE41	0.583298	-0.403436	0.692242	-0.582796	0.560031	NA	TRUE
BHMT	29.7764	0.550755	0.549923	1.00151	0.316579	0.460748	TRUE
BHMT2	5.34906	0.561411	0.546628	1.02704	0.3044	0.450965	TRUE
BICC1	0.370286	0.501204	0.563252	0.889839	0.373552	NA	TRUE
BICD1	0.159488	0.342526	0.520932	0.657525	0.510843	NA	TRUE
BICD2	73.5035	0.621922	0.215055	2.89193	0.00382889	0.0155192	TRUE
BID	81.8357	-1.0769	0.2861	-3.76406	0.000167174	0.00118473	TRUE
BIK	2.75988	0.650943	0.6124	1.06294	0.28781	0.434495	TRUE
BIN1	537.668	0.979566	0.309027	3.16984	0.00152524	0.00727006	TRUE
BIN2	834.191	0.381642	0.181528	2.10238	0.0355196	0.0909411	TRUE
BIN2A	0	NA	NA	NA	NA	NA	FALSE
BIN3	71.1268	-0.5256	0.221886	-2.36879	0.0178465	0.0533786	TRUE
BIRC2	21.0321	-1.28795	0.389673	-3.30521	0.000949056	0.00496545	TRUE
BIRC3	42.9074	-1.40701	0.26804	-5.24924	1.52726e-07	3.1282e-06	TRUE
BIRC5	14.7117	1.0386	0.399327	2.60087	0.00929873	0.0317839	TRUE
BIRC6	70.8803	-0.794864	0.411982	-1.92937	0.0536855	0.124466	TRUE
BIRC7	0	NA	NA	NA	NA	NA	FALSE
BLCAP	18.1807	-0.482197	0.393413	-1.22568	0.22032	0.358884	TRUE
BLES03	342.182	0.590892	0.237592	2.48701	0.0128822	0.0412238	FALSE
BLK	47.4078	0.00241339	0.261825	0.00921758	0.992646	0.995485	TRUE
BLM	23.6382	0.0671064	0.281939	0.238018	0.811867	0.878384	TRUE
BLMH	68.3675	0.0376415	0.230564	0.163259	0.870315	0.918274	TRUE
BLNK	53.6779	0.160677	0.237514	0.676493	0.498727	0.632966	TRUE
BLOC1S1	180.87	1.3465	0.325728	4.13382	3.56784e-05	0.000331377	FALSE
BLOC1S2	47.9529	-0.948005	0.27643	-3.42946	0.000604781	0.00343362	TRUE
BLOC1S3	40.0525	0.455081	0.277244	1.64144	0.100705	0.200285	TRUE
BLOC1S4	10.6373	-0.817807	0.419181	-1.95097	0.0510612	0.11999	TRUE
BLOC1S5	35.7121	0.0442444	0.283669	0.155972	0.876055	0.922207	TRUE
BLOC1S6	11.7889	-1.27664	0.461522	-2.76616	0.00567214	0.0214128	TRUE
BLVRA	481.699	-0.282003	0.234398	-1.2031	0.228939	0.369683	TRUE
BLVRB	499.894	0.759318	0.383688	1.979	0.0478163	0.114308	TRUE
BLZF1	21.6408	-0.623155	0.323545	-1.92603	0.0541011	0.125097	TRUE
BMF	50.2361	-0.310004	0.236368	-1.31153	0.189678	0.320988	TRUE
BMI1	2.53415	-1.93192	0.713805	-2.7065	0.0067996	0.024733	TRUE
BMP1	5.37395	0.748813	0.595993	1.25641	0.208967	0.344784	TRUE
BMP10	1.62003	-0.639074	0.711074	-0.898744	0.368789	0.510398	TRUE
BMP15	0	NA	NA	NA	NA	NA	FALSE
BMP2	0.215207	0.204965	0.522654	0.392163	0.694938	NA	TRUE
BMP2K	83.034	-0.70852	0.269655	-2.6275	0.0086014	0.0299377	TRUE
BMP3	0.166255	-0.0232966	0.523264	-0.0445218	0.964488	NA	TRUE
BMP4	1.42568	0.982887	0.706898	1.39042	0.164401	0.289139	TRUE
BMP5	0.210798	0.342526	0.520932	0.657525	0.510843	NA	TRUE
BMP6	0.0835778	0.0604541	0.522391	0.115726	0.90787	NA	TRUE
BMP7	15.3445	1.95138	0.415243	4.69937	2.60965e-06	3.54179e-05	TRUE
BMP8A	0	NA	NA	NA	NA	NA	TRUE
BMP8B	0	NA	NA	NA	NA	NA	TRUE
BMPER	0	NA	NA	NA	NA	NA	TRUE
BMPR1A	0.545004	0.678397	0.649499	1.04449	0.296258	NA	TRUE
BMPR1B	0	NA	NA	NA	NA	NA	TRUE
BMPR2	12.3689	-0.430524	0.533997	-0.806229	0.420111	0.560566	FALSE
BMS1	73.8978	-0.136162	0.187188	-0.72741	0.466975	0.604487	TRUE
BMX	10.2976	-1.8182	0.511545	-3.55433	0.000378936	0.00234097	TRUE
BMYC	0.452083	0.0109481	0.632058	0.0173214	0.98618	NA	FALSE
BNC1	0	NA	NA	NA	NA	NA	TRUE
BNC2	0.159488	0.342526	0.520932	0.657525	0.510843	NA	TRUE
BNIP1	24.5543	1.21835	0.325044	3.74826	0.000178068	0.00124698	TRUE
BNIP2	98.6712	-0.744238	0.255282	-2.91535	0.00355286	0.0145737	TRUE
BNIP3	1.57228	-1.11106	0.706645	-1.5723	0.115882	0.223056	TRUE
BNIP3L	14820.9	0.66965	0.266128	2.51628	0.0118602	0.038649	FALSE
BNIPL	0.238658	0.264405	0.521969	0.506552	0.612469	NA	TRUE
BOC	2.31207	-0.824159	0.678775	-1.21419	0.224677	0.364334	TRUE
BOD1	4.77791	-0.968629	0.552332	-1.75371	0.0794807	0.167178	TRUE
BOD1L1	29.5601	0.189377	0.312885	0.605263	0.545004	0.67397	TRUE
BOK	0.139296	-0.0237321	0.523268	-0.0453536	0.963825	NA	TRUE
BOLA1	39.1249	1.45372	0.426178	3.41106	0.000647117	0.00363031	TRUE
BOLA2	0	NA	NA	NA	NA	NA	TRUE
BOLA3	161.335	1.16258	0.286298	4.06074	4.89166e-05	0.000428684	TRUE
BOLL	0	NA	NA	NA	NA	NA	TRUE
BOP1	141.207	0.872534	0.231203	3.77389	0.000160719	0.00114715	TRUE
BORA	6.48379	-0.0345935	0.51187	-0.0675825	0.946118	0.968295	TRUE
BPGM	31806.4	0.693938	0.345927	2.00603	0.0448532	0.108885	TRUE
BPHL	3.86599	0.304769	0.692028	0.440399	0.659648	0.766984	TRUE
BPI	0.156637	-0.0436952	0.523454	-0.0834749	0.933474	NA	TRUE
BPIFA1	0	NA	NA	NA	NA	NA	TRUE
BPIFA2	7.43582	-0.401123	0.678856	-0.59088	0.554601	0.682454	TRUE
BPIFA2F	0	NA	NA	NA	NA	NA	FALSE
BPIFA3	0	NA	NA	NA	NA	NA	TRUE
BPIFA5	0	NA	NA	NA	NA	NA	FALSE
BPIFA6	208.881	-0.511164	0.57756	-0.88504	0.376135	0.517702	FALSE
BPIFB1	0	NA	NA	NA	NA	NA	TRUE
BPIFB2	0	NA	NA	NA	NA	NA	FALSE
BPIFB3	0	NA	NA	NA	NA	NA	TRUE
BPIFB4	7.87903	0.14982	0.472559	0.317039	0.751214	0.833859	FALSE
BPIFB5	0	NA	NA	NA	NA	NA	FALSE
BPIFB6	0	NA	NA	NA	NA	NA	TRUE
BPIFC	0	NA	NA	NA	NA	NA	TRUE
BPNT1	8.02598	-0.455776	0.472252	-0.965113	0.334488	0.478656	TRUE
BPTF	53.7355	-0.014642	0.242868	-0.060288	0.951926	0.970757	TRUE
BRAF	15.2677	-0.553594	0.503249	-1.10004	0.271315	0.41769	TRUE
BRAP	104.985	0.277811	0.17512	1.5864	0.112648	0.218264	TRUE
BRAT1	31.6411	-0.619251	0.325563	-1.90209	0.057159	0.130544	TRUE
BRCA1	1.39784	-0.877064	0.7059	-1.24248	0.214061	0.351394	TRUE
BRCA2	16.3877	-0.348937	0.345535	-1.00985	0.312569	0.457301	TRUE
BRCC3	26.5965	-1.922	0.365254	-5.26209	1.42429e-07	2.95179e-06	TRUE
BRD1	21.1995	-1.3324	0.394166	-3.38031	0.000724032	0.00398705	TRUE
BRD2	0	NA	NA	NA	NA	NA	TRUE
BRD3	80.0656	0.845465	0.196279	4.30747	1.65134e-05	0.000172607	TRUE
BRD4	144.858	0.085026	0.168423	0.504836	0.613674	0.731271	TRUE
BRD7	61.2853	-0.370622	0.212623	-1.74309	0.0813177	0.169761	TRUE
BRD8	46.5922	-0.582136	0.258323	-2.25352	0.0242262	0.06783	TRUE
BRD9	44.9811	-0.229245	0.251513	-0.911465	0.36205	0.504428	TRUE
BRDT	0	NA	NA	NA	NA	NA	TRUE
BRE	268.603	1.93854	0.267016	7.26	3.87088e-13	4.13552e-11	TRUE
BRF1	51.7962	-0.499896	0.244835	-2.04176	0.0411748	0.101891	TRUE
BRF2	20.9393	-1.34607	0.426236	-3.15803	0.00158836	0.00750391	TRUE
BRI3	84.6409	0.199709	0.231014	0.864488	0.38732	0.529038	TRUE
BRI3BP	16.727	0.723233	0.341348	2.11875	0.0341112	0.0882747	TRUE
BRINP1	0.166255	-0.0232966	0.523264	-0.0445218	0.964488	NA	TRUE
BRINP2	0	NA	NA	NA	NA	NA	TRUE
BRINP3	0	NA	NA	NA	NA	NA	FALSE
BRIP1	1.00227	0.72857	0.716751	1.01649	0.309396	NA	TRUE
BRIX1	31.3755	-0.338514	0.279512	-1.21109	0.225861	0.366014	TRUE
BRK1	287.024	0.375706	0.188289	1.99537	0.046003	0.110973	TRUE
BRMS1	0.210798	0.342526	0.520932	0.657525	0.510843	NA	TRUE
BRMS1L	0	NA	NA	NA	NA	NA	TRUE
BROX	52.7611	-0.821831	0.309533	-2.65507	0.00792915	0.0280112	TRUE
BRPF1	46.1761	-0.611289	0.26273	-2.32669	0.0199819	0.0582739	TRUE
BRPF3	43.0008	-0.257483	0.27373	-0.940644	0.346887	0.489909	TRUE
BRS3	0.0557186	0.114828	0.521737	0.220088	0.825803	NA	TRUE
BRSK1	2.84475	-0.144194	0.69345	-0.207937	0.835278	0.895626	TRUE
BRSK2	0.602154	-0.832936	0.699531	-1.19071	0.233769	NA	TRUE
BRWD1	20.4971	-0.794114	0.395411	-2.00833	0.0446088	0.108377	TRUE
BRWD3	7.32705	-0.464999	0.532116	-0.873869	0.38219	0.523394	TRUE
BSCL2	149.006	0.942239	0.270009	3.48966	0.000483643	0.00286519	TRUE
BSDC1	931.194	-0.647583	0.293888	-2.2035	0.0275593	0.0750555	TRUE
BSG	527.175	0.541983	0.245666	2.20618	0.0273714	0.074743	FALSE
BSN	0	NA	NA	NA	NA	NA	TRUE
BSND	0	NA	NA	NA	NA	NA	TRUE
BSPH2	0	NA	NA	NA	NA	NA	FALSE
BSPRY	19.1348	0.359224	0.341148	1.05299	0.292348	0.439992	TRUE
BST1	94.2828	-1.56383	0.299197	-5.22677	1.72499e-07	3.50396e-06	TRUE
BST2	360.711	-0.684455	0.279382	-2.44989	0.0142899	0.044691	FALSE
BSX	0	NA	NA	NA	NA	NA	FALSE
BTAF1	33.6146	-0.524876	0.266719	-1.9679	0.0490794	0.116314	TRUE
BTBD1	83.9945	0.100933	0.211739	0.476685	0.633586	0.747234	FALSE
BTBD10	10.3249	-0.527894	0.448599	-1.17676	0.239291	0.38138	TRUE
BTBD11	6.30976	-1.10739	0.507447	-2.18227	0.0290897	0.078371	TRUE
BTBD16	1.07505	0.494304	0.713059	0.693216	0.488174	NA	TRUE
BTBD17	0	NA	NA	NA	NA	NA	TRUE
BTBD18	0	NA	NA	NA	NA	NA	TRUE
BTBD2	54.2403	-0.0254562	0.274467	-0.0927477	0.926104	0.955303	TRUE
BTBD3	1.03136	-0.188692	0.714126	-0.264228	0.791604	NA	TRUE
BTBD6	25.6406	0.577428	0.284872	2.02698	0.0426649	0.104691	TRUE
BTBD7	18.9875	-0.673745	0.349589	-1.92725	0.0539485	0.124933	TRUE
BTBD9	36.7774	0.468675	0.265624	1.76443	0.0776592	0.16405	TRUE
BTC	0	NA	NA	NA	NA	NA	TRUE
BTD	12.2929	-0.0893585	0.382567	-0.233576	0.815314	0.879965	TRUE
BTF3	219.261	0.845801	0.213733	3.95728	7.5807e-05	0.000617171	TRUE
BTF3L4	9.51668	0.380158	0.46967	0.809415	0.418276	0.558901	TRUE
BTG1	434.932	-0.675967	0.212426	-3.18212	0.00146199	0.00700398	TRUE
BTG2	396.058	-0.104749	0.131389	-0.797248	0.425307	0.564851	TRUE
BTG3	3.92081	-0.246552	0.596686	-0.413202	0.679458	0.781721	TRUE
BTG4	0	NA	NA	NA	NA	NA	TRUE
BTK	90.6545	-0.955653	0.229617	-4.16195	3.15548e-05	0.000298493	TRUE
BTLA	75.4025	-0.281963	0.188946	-1.4923	0.135621	0.251295	TRUE
BTN1A1	0	NA	NA	NA	NA	NA	TRUE
BTN2A2	2.62931	-0.237103	0.682979	-0.34716	0.728471	0.817115	TRUE
BTN3A2	0	NA	NA	NA	NA	NA	FALSE
BTNL2	1.96498	0.017268	0.716683	0.0240943	0.980777	0.987691	TRUE
BTNL3	0.0730593	0.0833984	0.522124	0.159729	0.873094	NA	TRUE
BTNL5	0	NA	NA	NA	NA	NA	FALSE
BTNL7	0	NA	NA	NA	NA	NA	FALSE
BTNL8	0	NA	NA	NA	NA	NA	TRUE
BTRC	65.9889	-0.426494	0.455081	-0.937184	0.348664	0.491866	TRUE
BUB1	8.07243	-0.354702	0.55958	-0.633871	0.526165	0.657854	TRUE
BUB1B	2.98542	0.66205	0.639047	1.036	0.300204	0.44735	TRUE
BUB3	88.2261	-0.0122744	0.21183	-0.0579446	0.953793	0.971963	TRUE
BUD13	38.3382	0.250118	0.229849	1.08818	0.276514	0.423116	TRUE
BUD31	375.013	0.818722	0.302453	2.70694	0.00679061	0.0247149	TRUE
BVES	0	NA	NA	NA	NA	NA	TRUE
BYSL	76.8409	0.610339	0.312524	1.95293	0.0508277	0.119625	TRUE
BZRAP1	4.79465	-0.29477	0.642505	-0.458783	0.64639	0.756588	TRUE
BZW1	106.67	-0.629558	0.195098	-3.22688	0.00125146	0.00617376	TRUE
BZW2	77.1618	0.0302037	0.254834	0.118523	0.905653	0.942245	TRUE
C1D	4.54087	-0.863194	0.606546	-1.42313	0.154699	0.276878	TRUE
C1GALT1	48.5036	0.0530661	0.36062	0.147152	0.883012	0.926826	TRUE
C1GALT1C1	5.80747	-1.28769	0.568158	-2.26643	0.023425	0.0661452	TRUE
C1H6ORF35	14.6165	0.293732	0.434864	0.675457	0.499386	0.633409	FALSE
C1QA	1.42984	1.23952	0.665962	1.86124	0.0627099	0.13966	TRUE
C1QB	0.0278593	0.183262	0.520802	0.351885	0.724925	NA	TRUE
C1QBP	125.861	0.789847	0.207842	3.80023	0.000144564	0.00105137	TRUE
C1QC	1.22975	1.51668	0.703827	2.1549	0.0311694	0.0826188	TRUE
C1QL1	0.186391	-0.0143747	0.523178	-0.0274757	0.97808	NA	FALSE
C1QL2	0	NA	NA	NA	NA	NA	TRUE
C1QL3	0	NA	NA	NA	NA	NA	TRUE
C1QL4	0.0278593	0.183262	0.520802	0.351885	0.724925	NA	TRUE
C1QTNF1	1.55996	-0.636041	0.700648	-0.90779	0.363989	0.506192	TRUE
C1QTNF2	0	NA	NA	NA	NA	NA	TRUE
C1QTNF3	0.559172	-0.347011	0.529104	-0.655846	0.511923	NA	TRUE
C1QTNF4	0.581085	0.701887	0.601318	1.16725	0.24311	NA	TRUE
C1QTNF5	0	NA	NA	NA	NA	NA	TRUE
C1QTNF6	29.2605	-0.65195	0.447224	-1.45777	0.144904	0.263459	TRUE
C1QTNF7	0.0730593	0.0833984	0.522124	0.159729	0.873094	NA	TRUE
C1QTNF9	0	NA	NA	NA	NA	NA	TRUE
C1R	10.704	0.289795	0.61709	0.469616	0.638629	0.750872	TRUE
C1RL	7.18365	-1.63411	0.579387	-2.8204	0.00479633	0.0186576	TRUE
C1S	6.10806	0.943811	0.645105	1.46303	0.143458	0.261606	TRUE
C2	98.4303	-0.983376	0.3504	-2.80644	0.00500924	0.0193692	TRUE
C2CD2	3.27487	0.0137361	0.642889	0.0213662	0.982954	0.988744	TRUE
C2CD2L	140.233	0.926401	0.198329	4.67103	2.997e-06	3.97946e-05	TRUE
C2CD3	14.3758	-0.508712	0.446326	-1.13978	0.254379	0.398889	TRUE
C2CD4A	0.121055	0.0596032	0.522401	0.114095	0.909163	NA	TRUE
C2CD4B	0	NA	NA	NA	NA	NA	FALSE
C2CD4C	0.173978	-0.0632177	0.523708	-0.120712	0.903919	NA	TRUE
C2CD4D	0	NA	NA	NA	NA	NA	FALSE
C2CD5	21.72	-0.783008	0.327055	-2.39412	0.0166604	0.0504958	TRUE
C3	468.197	-0.164426	0.38009	-0.432599	0.665306	0.770715	TRUE
C3AR1	43.4311	-1.49856	0.303496	-4.93766	7.90663e-07	1.28827e-05	TRUE
C4A	9.57444	0.904647	0.531598	1.70175	0.0888022	0.181646	TRUE
C4B	5.5205	-0.832079	0.674581	-1.23348	0.217399	0.355303	FALSE
C4BPA	11.5113	0.536284	0.548796	0.977201	0.32847	0.473337	TRUE
C4BPB	9.10112	0.771139	0.616241	1.25136	0.210804	0.347021	TRUE
C5	8.45358	1.00262	0.671487	1.49313	0.135404	0.251099	TRUE
C5AR1	167.885	-1.64397	0.221351	-7.42699	1.11093e-13	1.46559e-11	TRUE
C5AR2	39.5532	-0.950295	0.294755	-3.22402	0.00126406	0.00622591	TRUE
C6	2.59641	1.58793	0.706667	2.24707	0.0246357	0.0686788	TRUE
C7	0.0730593	0.0833984	0.522124	0.159729	0.873094	NA	TRUE
C8A	9.15067	0.546141	0.54831	0.996043	0.319229	0.46356	TRUE
C8B	4.39768	0.559651	0.54577	1.02543	0.305159	0.451083	TRUE
C8G	9.65412	0.881956	0.47939	1.83975	0.0658051	0.144767	TRUE
C9	23.1719	0.552817	0.549717	1.00564	0.314589	0.459105	TRUE
CA1	91.7291	-1.05875	0.501149	-2.11264	0.0346318	0.0893393	TRUE
CA10	0.0931953	0.13196	0.521515	0.253032	0.800243	NA	TRUE
CAAP1	6.81806	-1.63685	0.586302	-2.79181	0.00524134	0.0200893	TRUE
CAB39	214.028	-0.408539	0.162691	-2.51114	0.0120341	0.039029	TRUE
CAB39L	36.4235	-0.399366	0.257281	-1.55226	0.120601	0.230117	FALSE
CABIN1	4.56164	-0.715793	0.575362	-1.24407	0.213472	0.350474	TRUE
CABLES1	0.731556	-0.122528	0.709959	-0.172584	0.862978	NA	TRUE
CABLES2	74.6	0.222529	0.19225	1.1575	0.247068	0.390863	TRUE
CABP1	1.80856	0.46113	0.693516	0.664916	0.506104	0.63988	TRUE
CABP2	2.81455	1.15188	0.716452	1.60776	0.107887	0.211449	TRUE
CABP4	9.60006	-0.735776	0.430404	-1.7095	0.0873578	0.17932	FALSE
CABP5	0.210798	0.342526	0.520932	0.657525	0.510843	NA	FALSE
CABP7	0.347956	-0.25419	0.544899	-0.46649	0.640865	NA	TRUE
CABS1	0	NA	NA	NA	NA	NA	FALSE
CABYR	0.652033	0.51017	0.653846	0.78026	0.435238	NA	TRUE
CACFD1	10.2684	0.808559	0.477818	1.69219	0.0906096	0.184482	TRUE
CACHD1	0	NA	NA	NA	NA	NA	TRUE
CACNA1A	7.94166	-0.34056	0.483285	-0.704677	0.481011	0.617983	TRUE
CACNA1B	0	NA	NA	NA	NA	NA	FALSE
CACNA1C	0.3587	0.492444	0.559769	0.879726	0.379008	NA	TRUE
CACNA1D	2.79484	-1.45291	0.670409	-2.1672	0.0302197	0.0806512	TRUE
CACNA1E	0.0931953	0.13196	0.521515	0.253032	0.800243	NA	TRUE
CACNA1F	0.187347	0.264405	0.521969	0.506552	0.612469	NA	FALSE
CACNA1G	0.784424	-0.610763	0.699063	-0.873689	0.382288	NA	TRUE
CACNA1H	0.0278593	0.183262	0.520802	0.351885	0.724925	NA	TRUE
CACNA1I	0	NA	NA	NA	NA	NA	FALSE
CACNA1S	0.162231	-0.0143747	0.523178	-0.0274757	0.97808	NA	TRUE
CACNA2D1	0	NA	NA	NA	NA	NA	TRUE
CACNA2D2	3.74123	-0.835166	0.628706	-1.32839	0.18405	0.314475	TRUE
CACNA2D3	0	NA	NA	NA	NA	NA	TRUE
CACNA2D4	0	NA	NA	NA	NA	NA	FALSE
CACNB1	6.75646	0.42725	0.506783	0.843064	0.399192	0.540758	TRUE
CACNB2	0.100919	0.0341722	0.522682	0.0653787	0.947873	NA	TRUE
CACNB3	1.6425	0.231791	0.698393	0.331892	0.739971	0.825862	TRUE
CACNB4	2.37724	-0.907116	0.685106	-1.32405	0.185486	0.316468	TRUE
CACNG1	0	NA	NA	NA	NA	NA	TRUE
CACNG2	0	NA	NA	NA	NA	NA	TRUE
CACNG3	0.0278593	0.183262	0.520802	0.351885	0.724925	NA	FALSE
CACNG4	0.658605	-0.380392	0.659457	-0.576826	0.564057	NA	TRUE
CACNG5	0.0557186	0.114828	0.521737	0.220088	0.825803	NA	TRUE
CACNG6	0.38656	0.570089	0.627326	0.90876	0.363477	NA	TRUE
CACNG7	0	NA	NA	NA	NA	NA	FALSE
CACNG8	0.0931953	0.13196	0.521515	0.253032	0.800243	NA	TRUE
CACTIN	74.0294	-0.0358007	0.193729	-0.184797	0.853388	0.907691	TRUE
CACUL1	61.6284	-0.353996	0.245265	-1.44332	0.148931	0.269225	TRUE
CACYBP	28.6139	-1.754	0.391349	-4.48193	7.39706e-06	8.71801e-05	TRUE
CAD	79.6074	0.279355	0.235725	1.18509	0.235983	0.377677	TRUE
CADM1	4.6166	-1.25148	0.576353	-2.17138	0.0299025	0.0799987	TRUE
CADM2	0	NA	NA	NA	NA	NA	TRUE
CADM3	43.1444	-0.51539	0.334837	-1.53922	0.12375	0.234593	TRUE
CADM4	0.413462	0.0264691	0.623182	0.0424742	0.966121	NA	FALSE
CADPS	0.0557186	0.114828	0.521737	0.220088	0.825803	NA	TRUE
CADPS2	2.6157	-1.02007	0.685264	-1.48857	0.1366	0.252706	TRUE
CAGE1	2.95703	-0.440579	0.623542	-0.706574	0.479831	0.616846	TRUE
CALB1	0	NA	NA	NA	NA	NA	TRUE
CALB2	0.486693	-0.310344	0.528536	-0.587177	0.557085	NA	TRUE
CALCA	0	NA	NA	NA	NA	NA	TRUE
CALCB	0	NA	NA	NA	NA	NA	TRUE
CALCOCO1	0.159488	0.342526	0.520932	0.657525	0.510843	NA	TRUE
CALCOCO2	0.0278593	0.183262	0.520802	0.351885	0.724925	NA	TRUE
CALCR	0.0730593	0.0833984	0.522124	0.159729	0.873094	NA	TRUE
CALCRL	5.68037	-0.601204	0.599909	-1.00216	0.316267	0.460389	TRUE
CALD1	44.0754	1.39516	0.354881	3.93136	8.44666e-05	0.000673373	TRUE
CALHM1	0.204632	-0.0840857	0.524069	-0.160448	0.872528	NA	TRUE
CALHM2	61.6881	-1.19527	0.228215	-5.23748	1.62781e-07	3.31754e-06	TRUE
CALHM3	0	NA	NA	NA	NA	NA	FALSE
CALM1	929.736	0.0884024	0.100664	0.87819	0.379841	0.521224	TRUE
CALM2	521.42	-0.846451	0.149738	-5.65286	1.57796e-08	4.35057e-07	TRUE
CALM3	251.704	0.800924	0.160803	4.98077	6.33332e-07	1.07772e-05	TRUE
CALML3	0.247451	0.342526	0.520932	0.657525	0.510843	NA	TRUE
CALML4	1.06583	0.551056	0.701504	0.785535	0.43214	NA	TRUE
CALML5	0.159488	0.342526	0.520932	0.657525	0.510843	NA	TRUE
CALN1	0	NA	NA	NA	NA	NA	TRUE
CALR	2291.28	0.272505	0.207143	1.31554	0.188329	0.319504	TRUE
CALR3	0.858608	-0.275189	0.713874	-0.385487	0.699877	NA	TRUE
CALR4	0	NA	NA	NA	NA	NA	FALSE
CALU	81.6839	0.594131	0.232839	2.55168	0.0107206	0.035742	TRUE
CALY	0	NA	NA	NA	NA	NA	TRUE
CAMK1	27.3145	1.29767	0.322011	4.02991	5.57991e-05	0.000477406	TRUE
CAMK1D	10.6977	-1.77492	0.501911	-3.53631	0.000405753	0.00247308	TRUE
CAMK1G	0	NA	NA	NA	NA	NA	TRUE
CAMK2A	2.50508	-0.249295	0.692375	-0.360057	0.718804	0.810273	TRUE
CAMK2B	2.57555	-0.725768	0.6613	-1.09749	0.272428	0.418902	TRUE
CAMK2D	40.3884	-1.80866	0.441771	-4.09412	4.23767e-05	0.000380337	TRUE
CAMK2G	7.78343	-1.07319	0.559962	-1.91654	0.0552968	0.127119	TRUE
CAMK2N1	4.38246	0.445211	0.595989	0.747011	0.455057	0.593514	TRUE
CAMK2N2	0	NA	NA	NA	NA	NA	TRUE
CAMK4	121.946	1.13369	0.215849	5.25226	1.50243e-07	3.09441e-06	TRUE
CAMKK1	38.3518	-1.44527	0.262371	-5.50847	3.61956e-08	9.00779e-07	TRUE
CAMKK2	11.3814	-1.93067	0.465502	-4.1475	3.3612e-05	0.000314558	TRUE
CAMKMT	5.54288	0.779157	0.516109	1.50968	0.131126	0.245354	TRUE
CAMKV	5.09729	-0.795224	0.710547	-1.11917	NA	NA	TRUE
CAMLG	15.2222	-0.00564817	0.375182	-0.0150545	0.987989	0.991969	TRUE
CAMP	22.1727	-0.25284	0.385343	-0.656143	0.511732	0.644869	TRUE
CAMSAP1	50.3835	-0.191272	0.250021	-0.765024	0.444257	0.584013	TRUE
CAMSAP2	14.1041	-0.00564104	0.37853	-0.0149025	0.98811	0.991991	TRUE
CAMSAP3	1.11355	1.01522	0.716751	1.41642	0.156652	0.279233	TRUE
CAMTA1	5.87729	0.924649	0.526069	1.75766	0.0788058	0.1661	TRUE
CAMTA2	159.139	-1.00145	0.178232	-5.61881	1.92277e-08	5.20762e-07	TRUE
CAND1	61.8805	-0.301011	0.214766	-1.40158	0.161041	0.2847	TRUE
CAND2	6.42879	2.19785	0.5168	4.2528	2.11114e-05	0.000213709	TRUE
CANT1	54.2934	-0.508443	0.245851	-2.06809	0.0386314	0.0970848	TRUE
CANX	194.105	-0.767002	0.239775	-3.19885	0.00137979	0.00668325	TRUE
CAP1	1611.05	-0.195327	0.141362	-1.38175	0.167049	0.292663	TRUE
CAP2	0	NA	NA	NA	NA	NA	TRUE
CAPG	451.189	1.05346	0.305644	3.4467	0.000567489	0.00325808	TRUE
CAPN1	111.095	0.0375827	0.221341	0.169795	0.865171	0.91511	TRUE
CAPN10	28.3853	-0.184399	0.321795	-0.573032	0.566623	0.692903	TRUE
CAPN11	0	NA	NA	NA	NA	NA	TRUE
CAPN12	1.43655	-0.455336	0.71622	-0.635749	0.52494	0.656791	TRUE
CAPN13	0.412064	-0.555784	0.685886	-0.810315	0.417759	NA	TRUE
CAPN15	18.1855	-0.115109	0.347637	-0.331118	0.740555	0.826063	TRUE
CAPN2	253.073	-0.764705	0.146758	-5.21064	1.88186e-07	3.79122e-06	TRUE
CAPN3	38.9396	0.0895088	0.310322	0.288438	0.773011	0.849825	TRUE
CAPN5	170.974	0.453162	0.150967	3.00173	0.00268453	0.0116056	TRUE
CAPN6	0	NA	NA	NA	NA	NA	TRUE
CAPN7	14.7708	-1.0349	0.456897	-2.26505	0.0235094	0.0663052	TRUE
CAPN8	2.52896	-0.726669	0.68274	-1.06434	0.287174	0.434068	TRUE
CAPN9	0.21795	-0.0987816	0.524314	-0.188402	0.850562	NA	TRUE
CAPNS1	204.238	1.37547	0.273387	5.03122	4.87374e-07	8.63847e-06	TRUE
CAPNS2	0.350751	-0.367469	0.627756	-0.585369	0.5583	NA	TRUE
CAPRIN1	240.986	-0.345177	0.152636	-2.26144	0.0237323	0.0667366	TRUE
CAPRIN2	3.03921	0.207043	0.637637	0.324703	0.745406	0.830003	TRUE
CAPS2	0	NA	NA	NA	NA	NA	TRUE
CAPSL	0	NA	NA	NA	NA	NA	TRUE
CAPZA1	248.023	-1.34414	0.229088	-5.86737	4.42754e-09	1.43708e-07	TRUE
CAPZA2	118.989	-1.29076	0.276543	-4.66747	3.04927e-06	4.02707e-05	TRUE
CAPZA3	0	NA	NA	NA	NA	NA	TRUE
CAPZB	789.998	0.485602	0.120912	4.01617	5.91527e-05	0.000501898	TRUE
CAR11	28.4704	1.12402	0.451109	2.49168	0.012714	0.040792	FALSE
CAR12	0.159488	0.342526	0.520932	0.657525	0.510843	NA	FALSE
CAR13	0.338509	0.0817638	0.539931	0.151434	0.879634	NA	FALSE
CAR14	7.34011	0.889808	0.557634	1.59569	0.110559	0.215412	FALSE
CAR15	0	NA	NA	NA	NA	NA	FALSE
CAR2	12909.2	0.471512	0.336358	1.40181	0.160971	0.284698	FALSE
CAR3	12.3917	0.604855	0.581168	1.04076	0.297988	0.445529	FALSE
CAR4	0.0557186	0.114828	0.521737	0.220088	0.825803	NA	FALSE
CAR5A	0.283858	0.17978	0.526736	0.34131	0.73287	NA	FALSE
CAR5B	26.7606	-3.12342	0.547398	-5.70594	1.157e-08	3.31664e-07	FALSE
CAR6	11.3118	1.66204	0.410694	4.04692	5.1897e-05	0.000451257	FALSE
CAR7	0	NA	NA	NA	NA	NA	FALSE
CAR8	1.33602	0.524254	0.715922	0.732278	0.463999	0.601987	FALSE
CAR9	0.186391	-0.0143747	0.523178	-0.0274757	0.97808	NA	FALSE
CARD10	30.0789	-2.29376	0.364856	-6.28675	3.24176e-10	1.46225e-08	TRUE
CARD14	6.66687	-0.286119	0.514795	-0.555793	0.578353	0.702764	TRUE
CARD6	76.3625	-0.33816	0.262997	-1.28579	0.198515	0.331913	TRUE
CARD9	103.59	-0.526417	0.247585	-2.12621	0.0334857	0.0871154	TRUE
CARF	3.21204	-0.115158	0.660919	-0.174239	0.861678	0.912631	TRUE
CARHSP1	6927.84	1.61365	0.290063	5.5631	2.65022e-08	6.87433e-07	TRUE
CARKD	53.061	0.62604	0.303041	2.06586	0.0388416	0.0975133	TRUE
CARM1	26.4174	-0.504425	0.299572	-1.68382	0.092216	0.187101	TRUE
CARNS1	15.601	-0.015283	0.388809	-0.0393073	0.968645	0.981201	TRUE
CARS	47.4552	-0.10594	0.248764	-0.425867	0.670205	0.775073	TRUE
CARS2	9.26728	-0.27875	0.445991	-0.625013	0.531963	0.663278	TRUE
CARTPT	0	NA	NA	NA	NA	NA	TRUE
CASC1	17.4706	0.339401	0.354663	0.956968	0.338583	0.482527	TRUE
CASC3	14.8041	-1.97354	0.524027	-3.76611	0.000165812	0.00117728	TRUE
CASC4	1.17288	-0.226283	0.712946	-0.317392	0.750946	0.833796	TRUE
CASC5	1.58228	0.0838254	0.706539	0.118642	0.905559	0.942245	TRUE
CASK	0.766977	0.266891	0.712396	0.374638	0.70793	NA	TRUE
CASKIN1	1.64655	-0.0605113	0.703029	-0.0860724	0.931409	0.959162	TRUE
CASKIN2	1.28196	0.884682	0.716458	1.2348	0.216905	0.354827	TRUE
CASP1	201.82	-0.561484	0.184618	-3.04133	0.00235533	0.0104474	TRUE
CASP12	0.551932	-0.236858	0.651334	-0.363651	0.716119	NA	TRUE
CASP14	0	NA	NA	NA	NA	NA	TRUE
CASP2	44.3387	-0.235437	0.260199	-0.904833	0.365554	0.507425	TRUE
CASP3	64.4896	-0.805292	0.254875	-3.15955	0.00158012	0.00747359	TRUE
CASP4	41.7048	-1.39403	0.2932	-4.75454	1.98898e-06	2.82767e-05	FALSE
CASP6	20.0124	-0.134983	0.344033	-0.392356	0.694795	0.793786	TRUE
CASP7	15.8808	-0.979285	0.362343	-2.70265	0.00687893	0.0249328	TRUE
CASP8	55.6204	-0.637138	0.296178	-2.1512	0.0314603	0.0831867	TRUE
CASP8AP2	6.67056	-1.15799	0.521669	-2.21979	0.0264333	0.0727153	TRUE
CASP9	27.6625	-0.649276	0.313874	-2.06859	0.0385848	0.0969877	TRUE
CASQ1	3.66459	0.196016	0.588107	0.333301	0.738907	0.825006	TRUE
CASQ2	0	NA	NA	NA	NA	NA	FALSE
CASR	0	NA	NA	NA	NA	NA	TRUE
CASS4	10.9205	-2.18944	0.50425	-4.34198	1.41204e-05	0.000151172	FALSE
CAST	117.797	-1.91664	0.292233	-6.55859	5.43183e-11	3.204e-09	TRUE
CASZ1	3.28798	0.442029	0.637377	0.693513	0.487988	0.623529	TRUE
CAT	675.96	-0.618803	0.341685	-1.81103	0.0701358	0.152058	TRUE
CATSPER1	0	NA	NA	NA	NA	NA	FALSE
CATSPER2	0.44329	-0.0407003	0.627995	-0.0648099	0.948325	NA	TRUE
CATSPER3	0	NA	NA	NA	NA	NA	FALSE
CATSPER4	0.159488	0.342526	0.520932	0.657525	0.510843	NA	TRUE
CATSPERD	2.06215	0.0530489	0.7012	0.0756545	0.939694	0.964456	TRUE
CATSPERG1	9.16574	0.727783	0.433796	1.67771	0.0934044	0.188918	FALSE
CAV1	0.446797	-0.12124	0.673972	-0.179889	0.85724	NA	TRUE
CAV2	0.668963	-0.46447	0.698323	-0.665122	0.505973	NA	TRUE
CAV3	0	NA	NA	NA	NA	NA	TRUE
CBFA2T2	19.5096	-1.16647	0.355151	-3.28443	0.00102189	0.00526474	TRUE
CBFA2T3	48.3819	0.454745	0.280063	1.62372	0.104435	0.206066	TRUE
CBFB	33.9729	-0.853131	0.38875	-2.19455	0.0281959	0.0764668	TRUE
CBL	101.184	-1.37565	0.292402	-4.70466	2.54295e-06	3.4666e-05	TRUE
CBLB	50.0042	-0.905708	0.391315	-2.31452	0.0206391	0.0598633	TRUE
CBLC	0.0931953	0.13196	0.521515	0.253032	0.800243	NA	TRUE
CBLL1	16.8712	-1.82675	0.381615	-4.7869	1.69376e-06	2.48573e-05	TRUE
CBLN1	0	NA	NA	NA	NA	NA	TRUE
CBLN2	20.3619	0.654117	0.421331	1.5525	0.120542	0.230112	TRUE
CBLN3	0.777638	0.318044	0.688946	0.461638	0.644341	NA	TRUE
CBLN4	0	NA	NA	NA	NA	NA	TRUE
CBR1	2.53942	0.478158	0.680959	0.702184	0.482564	0.618984	TRUE
CBR3	3.46988	0.735708	0.578991	1.27067	0.203846	0.338565	TRUE
CBR4	3.54869	-0.331697	0.640341	-0.518	0.604458	0.723213	TRUE
CBS	1.05012	0.695131	0.629673	1.10395	0.269613	NA	TRUE
CBWD1	2.78069	-0.0549461	0.621465	-0.0884139	0.929548	0.958049	FALSE
CBX1	29.706	-0.494426	0.350745	-1.40964	0.158645	0.281966	TRUE
CBX2	20.735	1.13602	0.302212	3.759	0.000170592	0.00120287	TRUE
CBX3	52.285	0.19843	0.21552	0.920705	0.357204	0.499911	TRUE
CBX4	13.8419	-1.08784	0.381014	-2.8551	0.0043023	0.0170494	TRUE
CBX5	8.95633	-0.17439	0.429004	-0.406498	0.684377	0.785979	TRUE
CBX6	6.35452	0.644787	0.535662	1.20372	0.228698	0.369488	TRUE
CBX7	42.6771	-0.00618667	0.259555	-0.0238357	0.980984	0.987746	TRUE
CBX8	8.65287	0.420887	0.446847	0.941904	0.346242	0.489349	TRUE
CBY1	4.20227	0.435179	0.594573	0.731918	0.464219	0.602188	TRUE
CBY3	0.0931953	0.13196	0.521515	0.253032	0.800243	NA	TRUE
CC2D1A	132.477	0.544507	0.254654	2.13822	0.0324991	0.0851388	TRUE
CC2D1B	124.49	0.239175	0.222937	1.07284	0.283345	0.430296	TRUE
CC2D2A	0.661812	0.0824823	0.661179	0.12475	0.900721	NA	TRUE
CC2D2B	0.466629	-0.0207575	0.563588	-0.0368311	0.97062	NA	FALSE
CCAR1	26.2275	-0.369766	0.297017	-1.24493	0.213157	0.350003	TRUE
CCAR2	109.983	-0.137653	0.170404	-0.8078	0.419206	0.559761	FALSE
CCBE1	0	NA	NA	NA	NA	NA	TRUE
CCBL1	55.4252	0.959592	0.262293	3.65848	0.000253718	0.00167868	TRUE
CCDC101	65.703	0.836027	0.300733	2.77996	0.00543654	0.02069	TRUE
CCDC102A	25.4709	0.654392	0.349264	1.87363	0.0609814	0.136954	TRUE
CCDC103	0.0278593	0.183262	0.520802	0.351885	0.724925	NA	TRUE
CCDC104	39.1529	-0.136449	0.259918	-0.524969	0.599605	0.719608	TRUE
CCDC105	0	NA	NA	NA	NA	NA	TRUE
CCDC106	1.58831	-0.187053	0.691612	-0.270459	0.786807	0.859832	TRUE
CCDC107	69.0414	0.535456	0.327036	1.6373	0.101568	0.201641	TRUE
CCDC109B	29.0972	-0.0507185	0.341259	-0.148621	0.881852	0.926164	TRUE
CCDC11	2.39433	0.0575045	0.679895	0.0845785	0.932596	0.959982	TRUE
CCDC110	0	NA	NA	NA	NA	NA	TRUE
CCDC111	12.4555	-1.02083	0.483881	-2.10967	0.0348868	0.0898272	TRUE
CCDC112	1.14833	-0.755766	0.715367	-1.05647	0.290753	0.437913	TRUE
CCDC113	0.162231	-0.0143747	0.523178	-0.0274757	0.97808	NA	TRUE
CCDC114	7.52096	0.504069	0.472338	1.06718	0.28589	0.433143	TRUE
CCDC115	17.2848	-1.10467	0.378011	-2.92232	0.00347432	0.0142994	TRUE
CCDC116	0.37303	0.0790864	0.550776	0.143591	0.885823	NA	TRUE
CCDC117	8.3386	-0.599404	0.61596	-0.973121	0.330493	0.475073	TRUE
CCDC12	60.4342	0.406743	0.270143	1.50566	0.132155	0.246602	TRUE
CCDC120	1.19525	-1.52197	0.715351	-2.12758	0.0333716	0.086929	TRUE
CCDC121	0	NA	NA	NA	NA	NA	TRUE
CCDC122	0.285415	-0.186813	0.530766	-0.351968	0.724862	NA	TRUE
CCDC124	258.061	1.25366	0.311742	4.02148	5.78344e-05	0.000492757	TRUE
CCDC125	6.16134	-0.763335	0.51975	-1.46866	0.141926	0.259739	TRUE
CCDC126	3.04719	-1.01651	0.658141	-1.54452	0.122463	0.232621	TRUE
CCDC127	6.11829	-0.166059	0.553364	-0.30009	0.764109	0.843365	TRUE
CCDC129	0	NA	NA	NA	NA	NA	TRUE
CCDC13	0.162231	-0.0143747	0.523178	-0.0274757	0.97808	NA	TRUE
CCDC130	30.267	0.449874	0.282651	1.59163	0.111469	0.216565	TRUE
CCDC132	5.21754	-0.946076	0.608239	-1.55543	0.119843	0.229205	TRUE
CCDC134	30.7489	-0.314319	0.342578	-0.917511	0.358875	0.501485	TRUE
CCDC135	0.0278593	0.183262	0.520802	0.351885	0.724925	NA	TRUE
CCDC136	11.6029	0.703385	0.441913	1.59168	0.111456	0.216565	TRUE
CCDC137	37.8342	0.0368451	0.265528	0.138762	0.889638	0.93163	TRUE
CCDC138	0.826894	0.344922	0.693305	0.497505	0.618833	NA	TRUE
CCDC14	3.71749	-0.606838	0.570537	-1.06363	0.287498	0.434338	TRUE
CCDC141	0.515338	0.284344	0.685698	0.414679	0.678377	NA	TRUE
CCDC142	14.9713	-1.08486	0.522575	-2.07599	0.0378949	0.0955338	TRUE
CCDC144B	0.0278593	0.183262	0.520802	0.351885	0.724925	NA	FALSE
CCDC146	9.26767	0.201223	0.419814	0.479316	0.631714	0.745886	TRUE
CCDC147	0	NA	NA	NA	NA	NA	TRUE
CCDC148	0	NA	NA	NA	NA	NA	TRUE
CCDC149	0.5644	0.285731	0.702299	0.40685	0.684118	NA	TRUE
CCDC15	1.65381	0.093009	0.689215	0.134949	0.892652	0.933829	TRUE
CCDC150	1.13018	0.07851	0.665109	0.118041	0.906035	0.942286	TRUE
CCDC151	0	NA	NA	NA	NA	NA	TRUE
CCDC152	0.346835	0.390119	0.54973	0.709657	0.477917	NA	TRUE
CCDC153	0.459619	0.449062	0.675997	0.664296	0.506501	NA	TRUE
CCDC154	0.597358	0.967442	0.684662	1.41302	0.15765	NA	FALSE
CCDC155	3.38239	1.06147	0.59177	1.79373	0.072857	0.156296	TRUE
CCDC157	1.38622	-0.302618	0.716705	-0.422235	0.672853	0.777037	TRUE
CCDC158	0.385603	0.0539356	0.554797	0.0972169	0.922554	NA	TRUE
CCDC159	8.39115	1.18684	0.496583	2.39002	0.0168473	0.0508737	TRUE
CCDC160	0.162231	-0.0143747	0.523178	-0.0274757	0.97808	NA	TRUE
CCDC163	7.8719	0.530126	0.542034	0.978031	0.328059	0.473023	FALSE
CCDC166	0	NA	NA	NA	NA	NA	TRUE
CCDC167	10.0035	0.946663	0.454212	2.08419	0.037143	0.0940379	TRUE
CCDC169	0	NA	NA	NA	NA	NA	TRUE
CCDC17	21.7447	-0.238194	0.313761	-0.75916	0.447757	0.587211	TRUE
CCDC170	0.0278593	0.183262	0.520802	0.351885	0.724925	NA	TRUE
CCDC172	0	NA	NA	NA	NA	NA	TRUE
CCDC173	0	NA	NA	NA	NA	NA	TRUE
CCDC174	25.9999	0.123462	0.295451	0.417878	0.676036	0.779206	TRUE
CCDC175	0.635435	-0.376671	0.694181	-0.542611	0.587397	NA	TRUE
CCDC176	0.187347	0.264405	0.521969	0.506552	0.612469	NA	TRUE
CCDC177	1.13474	-0.0893659	0.715625	-0.124878	0.90062	0.939281	FALSE
CCDC178	0	NA	NA	NA	NA	NA	FALSE
CCDC179	0	NA	NA	NA	NA	NA	TRUE
CCDC18	0.121055	0.0596032	0.522401	0.114095	0.909163	NA	TRUE
CCDC180	5.15809	-0.419788	0.566315	-0.741262	0.458535	0.596841	TRUE
CCDC181	7.56484	-0.377786	0.477358	-0.79141	0.428705	0.568559	TRUE
CCDC182	0	NA	NA	NA	NA	NA	FALSE
CCDC183	0	NA	NA	NA	NA	NA	FALSE
CCDC184	0	NA	NA	NA	NA	NA	FALSE
CCDC19	1.25978	-0.283254	0.713213	-0.397152	0.691255	0.791213	TRUE
CCDC22	99.5974	0.398741	0.232153	1.71758	0.0858736	0.176865	TRUE
CCDC23	19.6298	1.17616	0.316561	3.71543	0.000202855	0.00139119	TRUE
CCDC24	0.0278593	0.183262	0.520802	0.351885	0.724925	NA	TRUE
CCDC25	14.3085	-0.666335	0.39307	-1.6952	0.0900367	0.183559	FALSE
CCDC27	0.239314	-0.12565	0.524857	-0.2394	0.810796	NA	FALSE
CCDC28A	34.034	0.109472	0.261017	0.419406	0.674919	0.778836	TRUE
CCDC28B	31.3076	1.02676	0.331558	3.09679	0.00195631	0.00893596	TRUE
CCDC3	0	NA	NA	NA	NA	NA	TRUE
CCDC30	0.247451	0.342526	0.520932	0.657525	0.510843	NA	TRUE
CCDC32	33.8737	-0.510294	0.259196	-1.96876	0.0489808	0.116152	FALSE
CCDC33	0	NA	NA	NA	NA	NA	TRUE
CCDC34	0.592947	0.103344	0.684971	0.150873	0.880076	NA	TRUE
CCDC36	0	NA	NA	NA	NA	NA	TRUE
CCDC37	2.07287	-0.652666	0.698415	-0.934496	0.350048	0.493081	TRUE
CCDC38	0	NA	NA	NA	NA	NA	TRUE
CCDC39	5.21437	-0.303281	0.543631	-0.55788	0.576927	0.701518	TRUE
CCDC40	1.42126	-0.0799961	0.711855	-0.112377	0.910525	0.945032	TRUE
CCDC41	3.98487	-0.803853	0.624255	-1.2877	0.19785	0.331073	TRUE
CCDC42	0	NA	NA	NA	NA	NA	TRUE
CCDC42B	0.567961	0.366095	0.592499	0.617884	0.536652	NA	TRUE
CCDC43	10.9039	-0.737508	0.415511	-1.77494	0.0759076	0.161154	TRUE
[truncated: 21,481 more rows]

## Sheet: S5 DEG analysis rat heart
Table S5. Result of DESeq2-analysis for differentially expressed genes during aging in rat heart
	baseMean	log2FoldChange	lfcSE	stat	pvalue	padj	ortholog_in_the_other_species
A1BG	0.233088	-0.0016012	0.036177	-0.0442602	0.964697	NA	TRUE
A1CF	0.774757	-0.0871066	0.0560911	-1.55295	0.120435	NA	TRUE
A1I3	73.8913	-0.178151	0.0778791	-2.28754	0.0221643	0.138061	FALSE
A26C2	0	NA	NA	NA	NA	NA	FALSE
A2M	0	NA	NA	NA	NA	NA	TRUE
A3GALT2	139.669	-0.155401	0.149605	-1.03874	0.298925	0.60389	FALSE
A4GALT	1.44866	-0.00696218	0.0975182	-0.0713937	0.943084	NA	TRUE
A4GNT	0	NA	NA	NA	NA	NA	TRUE
AAAS	128.677	0.0312325	0.111998	0.278867	0.780347	0.915772	TRUE
AACS	51.2215	-0.0428798	0.154698	-0.277184	0.781639	0.916261	TRUE
AADAC	0.339544	-0.0233965	0.036177	-0.646724	0.51781	NA	TRUE
AADACL2	0	NA	NA	NA	NA	NA	TRUE
AADACL3	0	NA	NA	NA	NA	NA	FALSE
AADACL4	0.108688	-0.00782843	0.036177	-0.216393	0.828682	NA	TRUE
AADAT	44.3162	-0.385551	0.158273	-2.43598	0.0148514	0.106562	TRUE
AAED1	1228.45	-0.0659481	0.0655294	-1.00639	0.314229	0.619703	TRUE
AAGAB	969.95	-0.117236	0.0643986	-1.82047	0.0686874	0.27723	TRUE
AAK1	417.232	-0.44549	0.109568	-4.0659	4.78482e-05	0.00178827	TRUE
AAMDC	271.634	-0.0694076	0.0897408	-0.773423	0.439272	0.727523	TRUE
AAMP	2154.11	0.0206725	0.0553268	0.373643	0.70867	0.883032	TRUE
AANAT	0.45081	0.0416111	0.0466278	0.89241	0.372173	NA	TRUE
AAR2	374.031	-0.159137	0.074391	-2.1392	0.0324193	0.177122	TRUE
AARD	1.10942	0.0683985	0.0744859	0.918274	0.358475	NA	TRUE
AARS	1700.59	0.201458	0.0654779	3.07674	0.0020928	0.0279246	TRUE
AARS2	529.548	0.109827	0.0796393	1.37905	0.16788	0.454439	TRUE
AARSD1	806.354	0.0103364	0.0677227	0.152628	0.878691	0.957408	TRUE
AASDH	183.526	0.154709	0.111544	1.38698	0.165449	0.450731	TRUE
AASDHPPT	534.168	0.0300185	0.078224	0.383751	0.701163	0.879002	TRUE
AASS	33.9695	-0.233383	0.164973	-1.41467	0.157164	0.439124	TRUE
AATF	183.829	0.0416106	0.106889	0.389287	0.697064	0.877485	TRUE
AATK	127.595	0.0261759	0.145933	0.179369	0.857648	0.94918	TRUE
ABAT	21.4108	-0.595681	0.165632	-3.59642	0.000322629	0.00724176	TRUE
ABCA1	256.69	-0.361721	0.131438	-2.75204	0.00592259	0.0573921	TRUE
ABCA12	1.00103	-0.0673589	0.0769184	-0.875719	0.381183	NA	TRUE
ABCA13	0	NA	NA	NA	NA	NA	TRUE
ABCA14	0.441626	-0.00704519	0.0536707	-0.131267	0.895564	NA	FALSE
ABCA15	0	NA	NA	NA	NA	NA	FALSE
ABCA16	6.93016	-0.0319826	0.159873	-0.20005	0.841442	0.941831	FALSE
ABCA17	2.12299	-0.0454751	0.0814115	-0.558583	0.576447	0.813431	FALSE
ABCA2	895.252	0.0870383	0.091623	0.949962	0.342132	0.644882	TRUE
ABCA3	459.25	-0.127788	0.0919153	-1.39027	0.164445	0.449517	TRUE
ABCA4	11.5932	-0.430594	0.151751	-2.8375	NA	NA	TRUE
ABCA5	129.177	-0.367212	0.137227	-2.67595	0.00745183	0.067749	TRUE
ABCA6	1.88001	-0.203602	0.100343	-2.02906	0.0424523	0.207715	TRUE
ABCA7	189.111	0.325422	0.108285	3.00524	0.00265375	0.0327949	TRUE
ABCA8	79.5471	-0.168491	0.150949	-1.11621	0.264331	0.569568	FALSE
ABCA8A	2872.23	-0.0297401	0.124277	-0.239306	0.810869	0.928763	FALSE
ABCA9	313.676	-0.145221	0.14098	-1.03008	0.302971	0.608074	TRUE
ABCB10	632.679	0.0123139	0.0795863	0.154724	0.877039	0.956835	TRUE
ABCB11	8.65225	-0.467699	0.118682	-3.94076	8.12222e-05	0.00269539	TRUE
ABCB1A	238.786	-0.328135	0.116625	-2.81359	0.00489922	0.0500585	FALSE
ABCB1B	21.5576	-0.831396	0.175042	-4.74969	2.03728e-06	0.000141306	FALSE
ABCB4	395.575	-0.0369857	0.111907	-0.330504	0.741019	0.898479	TRUE
ABCB5	0	NA	NA	NA	NA	NA	TRUE
ABCB6	1201.91	0.124805	0.0833887	1.49666	0.134482	0.404839	TRUE
ABCB7	755.445	-0.26288	0.120187	-2.18725	0.028724	0.163691	TRUE
ABCB8	1300.93	-0.0548649	0.0686797	-0.798853	0.424376	0.716664	TRUE
ABCB9	211.538	0.283315	0.162603	1.74237	0.0814439	0.305354	TRUE
ABCC1	604.823	-0.108104	0.0997221	-1.08405	0.278342	0.584082	TRUE
ABCC10	76.1039	0.0691894	0.133837	0.516969	0.605178	0.828682	TRUE
ABCC12	0.661528	-0.0782042	0.0532768	-1.46789	0.142135	NA	TRUE
ABCC2	12.6777	-0.339	0.169603	-1.99879	0.0456311	0.216727	TRUE
ABCC3	183.575	0.0617565	0.102787	0.600821	0.54796	0.796515	TRUE
ABCC4	259.093	0.490882	0.116076	4.22897	2.34765e-05	0.00102888	TRUE
ABCC5	612.658	0.461599	0.074425	6.2022	5.56799e-10	1.20755e-07	TRUE
ABCC6	3.05439	-0.19308	0.0867208	-2.22645	0.0259837	0.152709	TRUE
ABCC8	885.423	0.237152	0.0906371	2.6165	0.00888365	0.0754082	TRUE
ABCC9	5338	-0.0744074	0.081217	-0.916155	0.359586	0.661526	TRUE
ABCD1	808.929	0.0157591	0.076016	0.207313	0.835766	0.939336	TRUE
ABCD2	50.2133	0.147598	0.172014	0.858059	0.39086	0.689048	TRUE
ABCD3	1458.33	0.214727	0.100281	2.14125	0.032254	0.176743	TRUE
ABCD4	64.9818	0.0506205	0.150146	0.337142	0.73601	0.896451	TRUE
ABCE1	1551.59	0.0178366	0.0671784	0.265511	0.790616	0.919795	TRUE
ABCF1	3790.33	0.0736137	0.0742938	0.990846	0.321761	0.626777	TRUE
ABCF2	1441.27	0.104922	0.0579578	1.81031	0.0702471	0.280879	TRUE
ABCF3	1608.58	-0.0154908	0.0504309	-0.307168	0.758715	0.906409	TRUE
ABCG1	372.758	0.154388	0.165857	0.930848	0.351932	0.654182	TRUE
ABCG2	17.1078	0.173232	0.175009	0.989849	0.322248	0.627049	TRUE
ABCG3	108.234	-0.196131	0.156362	-1.25434	0.209718	0.507738	FALSE
ABCG3L1	46.251	-0.0850695	0.155926	-0.545578	0.585356	0.818574	FALSE
ABCG3L2	23.2111	-0.235047	0.175067	-1.34261	0.179398	0.469392	FALSE
ABCG3L3	164.155	-0.116233	0.116551	-0.997272	0.318633	0.623882	FALSE
ABCG3L4	71.4012	-0.208659	0.166898	-1.25022	0.21122	0.509775	FALSE
ABCG4	26.5868	-0.110171	0.174595	-0.631008	0.528036	0.784879	TRUE
ABCG5	2.43659	0.0260597	0.1116	0.233509	0.815366	0.930276	TRUE
ABCG8	1.98826	-0.102134	0.0939334	-1.0873	0.276903	0.582894	TRUE
ABHD1	86.9494	0.363701	0.145236	2.5042	0.0122727	0.094299	TRUE
ABHD10	324.951	0.00744731	0.10936	0.068099	0.945707	0.983852	TRUE
ABHD11	367.354	0.0190687	0.0821907	0.232005	0.816534	0.93058	TRUE
ABHD12	522.838	0.298465	0.0810081	3.68438	0.000229259	0.00575543	TRUE
ABHD12B	0	NA	NA	NA	NA	NA	TRUE
ABHD13	378.268	-0.129788	0.0758103	-1.71201	0.0868944	0.316823	TRUE
ABHD14A	145.35	0.0289025	0.111614	0.258949	0.795674	0.92217	TRUE
ABHD14B	394.174	0.128194	0.089935	1.42541	0.154038	0.434592	TRUE
ABHD15	73.6323	-0.219533	0.143954	-1.52502	0.127254	0.392927	TRUE
ABHD16A	1840.78	0.292428	0.0831447	3.5171	0.000436289	0.00890979	TRUE
ABHD16B	0.768701	0.044105	0.0736377	0.598946	0.549209	NA	TRUE
ABHD17A	987.457	0.16771	0.0703661	2.3834	0.0171537	0.116924	TRUE
ABHD17B	224.388	-0.0567705	0.122493	-0.463459	0.643036	0.848915	TRUE
ABHD17C	457.183	0.0046164	0.0997861	0.046263	0.963101	0.988777	TRUE
ABHD2	229.349	-0.123762	0.129713	-0.954123	0.340022	0.6432	TRUE
ABHD3	18.0946	-0.0223197	0.174758	-0.127717	0.898373	0.965867	TRUE
ABHD4	950.404	-0.0443125	0.0619208	-0.715631	0.474219	0.750928	TRUE
ABHD5	698.841	-0.0606528	0.0756198	-0.802075	0.42251	0.714923	TRUE
ABHD6	212.216	-0.166706	0.116008	-1.43702	0.150711	0.42975	TRUE
ABHD8	142.1	-0.228123	0.118978	-1.91735	0.055194	0.243797	TRUE
ABI1	764.286	-0.0577937	0.0626716	-0.922166	0.356442	0.659041	TRUE
ABI2	399.605	-0.0776265	0.0835574	-0.92902	0.352879	0.655049	TRUE
ABI3	82.3293	0.162305	0.159641	1.01669	0.3093	0.614565	TRUE
ABI3BP	420.193	0.0341106	0.119004	0.286635	0.774392	0.913731	TRUE
ABL1	67.8017	-0.05115	0.14548	-0.351595	0.725142	0.891316	TRUE
ABL2	519.341	-0.15886	0.0937094	-1.69524	0.0900293	0.322405	TRUE
ABLIM1	11920.5	-0.175786	0.0889064	-1.9772	0.048019	0.223165	TRUE
ABLIM2	475.269	0.140974	0.0794404	1.77459	0.0759656	0.294715	TRUE
ABLIM3	1600.15	0.112349	0.0743394	1.5113	0.130712	0.399355	TRUE
ABO	70.4298	-0.0874489	0.139046	-0.628922	0.5294	0.786237	FALSE
ABO2	0.228471	-0.0156125	0.036177	-0.431558	0.666062	NA	FALSE
ABOL1	0	NA	NA	NA	NA	NA	FALSE
ABR	971.237	-0.0521786	0.0783144	-0.666271	0.505238	0.77095	TRUE
ABRA	504.084	-0.262885	0.174844	-1.50355	0.132698	0.402694	TRUE
ABRACL	126.619	-0.0977356	0.110695	-0.882924	0.377277	0.676502	TRUE
ABT1	155.89	0.0366597	0.108428	0.338101	0.735287	0.896291	TRUE
ABTB1	453.777	-0.0970375	0.0784911	-1.23629	0.216352	0.516082	TRUE
ABTB2	504.618	-0.106256	0.0721206	-1.4733	0.140669	0.414355	TRUE
AC1576	149.341	-0.3614	0.14548	-2.48418	0.012985	0.0977466	FALSE
ACAA1A	310.465	0.148416	0.0990931	1.49775	0.134199	0.404422	FALSE
ACAA1B	38.6758	0.228188	0.170089	1.34158	0.179733	0.469729	FALSE
ACAA2	18383.8	0.346611	0.0956634	3.62323	0.000290946	0.00674698	TRUE
ACACA	436.887	0.0392268	0.081878	0.479088	0.631876	0.843487	TRUE
ACACB	5382.74	-0.00902611	0.103618	-0.0871098	0.930584	0.980606	TRUE
ACAD10	2399.35	0.140684	0.128314	1.09641	0.272901	0.579173	TRUE
ACAD11	752.905	-0.12971	0.118982	-1.09017	0.275638	0.581646	TRUE
ACAD8	1462.58	-0.0649675	0.0709029	-0.916289	0.359516	0.661526	TRUE
ACAD9	2438.8	-0.0280797	0.06514	-0.431067	0.666419	0.860049	TRUE
ACADL	34576.3	0.115067	0.0791651	1.4535	0.146084	0.421947	TRUE
ACADM	25950.1	0.100229	0.0982655	1.01998	0.307738	0.613654	TRUE
ACADS	8894.2	0.114773	0.0871673	1.31669	0.187941	0.479711	TRUE
ACADSB	1415.3	0.2133	0.148383	1.4375	0.150576	0.429665	TRUE
ACADVL	12198.6	0.197875	0.0870921	2.27202	0.0230855	0.141639	TRUE
ACAN	0.788104	0.00512615	0.0672356	0.0762416	0.939227	NA	FALSE
ACAP1	61.7842	0.0366308	0.153843	0.238104	0.8118	0.928825	TRUE
ACAP2	659.941	0.0687212	0.0674523	1.01881	0.308292	0.614191	TRUE
ACAP3	230.977	0.264415	0.102316	2.5843	0.00975774	0.0801205	TRUE
ACAT1	19653.3	0.14864	0.0748515	1.9858	0.0470558	0.220568	TRUE
ACAT2	75.2609	0.010904	0.138216	0.0788912	0.937119	0.982021	TRUE
ACBD3	786.049	-0.17314	0.0716358	-2.41695	0.0156513	0.110095	TRUE
ACBD4	448.509	0.14478	0.0975232	1.48457	0.137657	0.40991	TRUE
ACBD5	262.337	-0.0917529	0.0852982	-1.07567	0.282074	0.587339	TRUE
ACBD6	200.503	0.114591	0.0973461	1.17715	0.239134	0.543593	TRUE
ACBD7	63.3879	0.209263	0.15167	1.37972	0.167672	0.454304	FALSE
ACCS	69.8961	-0.125407	0.148327	-0.845477	0.397844	0.694424	TRUE
ACCSL	1.67838	0.02434	0.101143	0.240648	0.809828	NA	TRUE
ACD	126.968	0.268725	0.115847	2.31966	0.0203593	0.131004	TRUE
ACE	302.244	-0.318025	0.102716	-3.09615	0.00196053	0.0265508	TRUE
ACE2	67.3475	-0.195869	0.16267	-1.20409	0.228557	0.529203	TRUE
ACE3	0	NA	NA	NA	NA	NA	FALSE
ACER1	0.42737	0.0176682	0.0459997	0.384093	0.700909	NA	TRUE
ACER2	382.831	0.0227991	0.111327	0.204794	0.837733	0.939777	TRUE
ACER3	211.998	-0.107482	0.10539	-1.01984	0.307802	0.613692	TRUE
ACHE	72.3226	0.35915	0.162169	2.21466	0.0267833	0.156072	TRUE
ACIN1	1361.2	0.105099	0.0581474	1.80746	0.0706913	0.281513	TRUE
ACKR2	88.9193	0.0795366	0.174769	0.455097	0.649039	0.851205	TRUE
ACKR4	88.9837	0.338221	0.174849	1.93436	0.053069	0.238238	TRUE
ACLY	554.149	0.234164	0.0836443	2.79951	0.00511795	0.0516596	TRUE
ACMSD	62.0096	-0.0357544	0.166865	-0.214272	0.830335	0.937735	TRUE
ACN9	115.341	0.0963345	0.128238	0.751219	0.452521	0.736333	TRUE
ACNAT1	2.01563	-0.0814679	0.0953596	-0.854324	0.392926	0.690366	FALSE
ACNAT2	1.00239	-0.0451447	0.0624896	-0.722436	0.470027	NA	FALSE
ACO1	891.063	-0.0114055	0.0603037	-0.189134	0.849988	0.945369	TRUE
ACO2	66163.9	0.0345523	0.0593541	0.582139	0.560473	0.804515	TRUE
ACOT1	15.0004	0.327169	0.173054	1.89056	0.0586831	0.252262	FALSE
ACOT11	311.307	0.35493	0.115651	3.06896	0.00214802	0.0283664	TRUE
ACOT12	1.10615	-0.111429	0.0782068	-1.42479	0.154217	NA	TRUE
ACOT13	2104.38	0.280595	0.0707195	3.96772	7.25628e-05	0.00249402	TRUE
ACOT2	1770.22	0.140855	0.130153	1.08222	0.279155	0.584986	TRUE
ACOT3	332.693	-0.236858	0.13137	-1.80298	0.071392	0.283009	FALSE
ACOT4	8.75619	-0.141137	0.158857	-0.888453	0.374297	0.673534	TRUE
ACOT5	0.329237	0.00462604	0.036177	0.127872	0.89825	NA	FALSE
ACOT6	3.86083	0.154328	0.12086	1.27692	0.201632	0.498191	FALSE
ACOT7	403.452	0.241468	0.0962911	2.50769	0.0121522	0.0936067	FALSE
ACOT8	102.781	-0.218215	0.134013	-1.62831	0.103459	0.349433	TRUE
ACOT9	810.543	0.0819456	0.0703262	1.16522	0.243929	0.548965	TRUE
ACOX1	4279.28	-0.0454253	0.0849912	-0.534471	0.593016	0.822307	TRUE
ACOX2	12.1723	-0.874267	0.165227	-5.2913	1.21447e-07	1.28085e-05	TRUE
ACOX3	388.329	-0.103838	0.0988565	-1.0504	0.293536	0.598583	TRUE
ACOXL	1.89994	0.0195964	0.105755	0.1853	0.852994	0.946555	TRUE
ACP1	95.1308	-0.00789555	0.132171	-0.0597375	0.952365	0.986078	TRUE
ACP2	287.591	-0.024202	0.0904245	-0.267649	0.78897	0.919463	TRUE
ACP5	24.8419	-0.133054	0.174957	-0.760492	0.446961	0.731848	TRUE
ACP6	230.78	0.337593	0.0979805	3.44551	0.000569989	0.0108087	TRUE
ACPL2	303.152	0.13567	0.105541	1.28547	0.198627	0.493878	TRUE
ACPP	3.64317	-0.103767	0.131914	-0.786631	0.431498	0.722491	TRUE
ACPT	0.777344	0.00293385	0.065972	0.0444712	0.964529	NA	FALSE
ACR	3.87502	0.235747	0.134411	1.75392	0.0794436	0.301447	TRUE
ACRBP	24.7756	0.337955	0.171793	1.96722	0.0491577	0.225869	TRUE
ACRV1	0	NA	NA	NA	NA	NA	TRUE
ACSBG1	2.22111	-0.103151	0.109798	-0.939462	0.347494	0.650542	TRUE
ACSBG2	0	NA	NA	NA	NA	NA	FALSE
ACSF2	5738.6	0.352333	0.10798	3.26296	0.00110254	0.0174481	TRUE
ACSF3	1274.55	0.126274	0.0670006	1.88467	0.0594745	0.254386	TRUE
ACSL1	25036.6	0.13817	0.0701247	1.97035	0.0487983	0.225077	TRUE
ACSL3	235.721	-0.250654	0.122586	-2.04471	0.0408832	0.203662	TRUE
ACSL4	204.463	-0.200167	0.0993352	-2.01506	0.0438981	0.212132	TRUE
ACSL5	483.719	-8.55422e-06	0.0995268	-8.59489e-05	0.999931	0.999946	TRUE
ACSL6	591.888	-0.113786	0.113872	-0.999243	0.317677	0.623053	TRUE
ACSM1	6.21983	-0.434873	0.120339	-3.61374	0.000301814	0.00692597	TRUE
ACSM2A	0	NA	NA	NA	NA	NA	TRUE
ACSM3	2.00531	-0.0287518	0.0928774	-0.309567	0.75689	0.905281	TRUE
ACSM4	0	NA	NA	NA	NA	NA	TRUE
ACSM5	1.1375	-0.146444	0.071732	-2.04155	0.0411965	NA	TRUE
ACSS1	11748.7	-0.183916	0.084411	-2.17881	0.0293456	0.165943	TRUE
ACSS2	1491.31	0.365972	0.093065	3.93244	8.40883e-05	0.00276665	TRUE
ACSS3	141.183	-0.208378	0.1741	-1.19689	0.23135	0.533455	TRUE
ACTA1	12660.5	-0.21638	0.115824	-1.86818	0.0617368	0.260271	TRUE
ACTA2	1562.37	-0.178969	0.17507	-1.02227	0.306653	0.612351	TRUE
ACTB	9843.33	0.00332471	0.10523	0.0315946	0.974795	0.9927	TRUE
ACTBL2	0.217776	0.0124101	0.036177	0.343038	0.73157	NA	FALSE
ACTC1	287417	0.0496967	0.0661284	0.751519	0.45234	0.736333	TRUE
ACTG1	26.8518	0.189405	0.173264	1.09316	0.274324	0.580465	FALSE
ACTG2	100.032	-0.0396702	0.137045	-0.289467	0.772224	0.912907	TRUE
ACTL10	5.7269	0.0239914	0.145058	0.165392	0.868636	0.954029	FALSE
ACTL11	0.898368	0.0466018	0.0701744	0.664086	0.506635	NA	FALSE
ACTL6A	380.302	0.0473846	0.0870056	0.544615	0.586018	0.818604	TRUE
ACTL6B	0.111704	0.00618284	0.036177	0.170906	0.864298	NA	TRUE
ACTL7A	1.10327	0.0557739	0.0871237	0.640168	0.522063	NA	TRUE
ACTL7B	0.768595	-0.0322893	0.0507412	-0.636352	0.524547	NA	FALSE
ACTL9	0	NA	NA	NA	NA	NA	FALSE
ACTL9B	0	NA	NA	NA	NA	NA	FALSE
ACTN1	377.627	0.205944	0.107661	1.91289	0.0557618	0.245252	FALSE
ACTN2	41551.4	0.0677813	0.04992	1.3578	0.174527	0.463917	TRUE
ACTN3	8.51463	0.267673	0.156366	1.71183	0.0869275	0.316823	FALSE
ACTN4	2326.48	0.116398	0.0721728	1.61276	0.106796	0.355863	TRUE
ACTR10	1221.36	-0.0268723	0.0713505	-0.376624	0.706453	0.881644	TRUE
ACTR1A	2918.08	-0.0691908	0.0608363	-1.13733	0.255401	0.559944	TRUE
ACTR1B	3798.99	0.0748854	0.0706254	1.06032	0.288999	0.594603	TRUE
ACTR2	2018.65	-0.181703	0.065115	-2.7905	0.00526272	0.0525521	TRUE
ACTR3	2573.32	-0.235365	0.0880743	-2.67235	0.00753222	0.0680149	TRUE
ACTR3B	425.401	0.140149	0.08195	1.71018	0.0872335	0.317172	TRUE
ACTR5	89.5912	0.219255	0.135094	1.62298	0.104593	0.351718	TRUE
ACTR6	343.806	-0.0527699	0.115658	-0.456259	0.648204	0.850971	TRUE
ACTR8	589.151	0.015831	0.0737581	0.214634	0.830053	0.937735	TRUE
ACTRT1	0	NA	NA	NA	NA	NA	FALSE
ACTRT2	0	NA	NA	NA	NA	NA	TRUE
ACTRT3	0.54285	0.00849464	0.0616676	0.137749	0.890439	NA	FALSE
ACVR1	483.804	0.0444758	0.0746467	0.595817	0.551297	0.798453	TRUE
ACVR1B	214.168	-0.0610298	0.106698	-0.571986	0.567331	0.808568	TRUE
ACVR1C	0.661949	0.0258781	0.0702952	0.368135	0.712773	NA	TRUE
ACVR2A	240.021	-0.138231	0.110796	-1.24762	0.212169	0.510567	TRUE
ACVR2B	151.583	0.127353	0.118921	1.0709	0.284215	0.589235	TRUE
ACVRL1	1017.27	0.11935	0.0882205	1.35286	0.1761	0.46623	TRUE
ACY1	561.822	0.269837	0.109162	2.47189	0.0134399	0.0999748	TRUE
ACY3	36.9617	-0.0488753	0.165369	-0.295553	0.767572	0.91042	TRUE
ACYP1	322.181	-0.0362352	0.10328	-0.350843	0.725706	0.891316	TRUE
ACYP2	900.905	0.0131602	0.0993293	0.132491	0.894596	0.964984	TRUE
ADA	117.582	-0.091881	0.144399	-0.6363	0.524581	0.782551	TRUE
ADAD1	2.1997	-0.00370882	0.105317	-0.0352157	0.971908	0.992469	TRUE
ADAD2	0	NA	NA	NA	NA	NA	TRUE
ADAL	107.955	-0.173842	0.128966	-1.34797	0.177668	0.467494	TRUE
ADAM10	1762.89	-0.117729	0.0614657	-1.91536	0.0554462	0.24435	TRUE
ADAM11	35.6056	-0.00575827	0.174744	-0.0329527	0.973712	0.992574	TRUE
ADAM12	12.9328	-0.0852928	0.170905	-0.499067	0.617732	0.835986	TRUE
ADAM15	760.612	-0.0614118	0.104645	-0.586861	0.557297	0.802961	TRUE
ADAM17	1071.03	-0.0319475	0.0948655	-0.336766	0.736293	0.896524	TRUE
ADAM18	0	NA	NA	NA	NA	NA	TRUE
ADAM19	3544.29	0.00413275	0.102792	0.0402051	0.96793	0.990105	TRUE
ADAM1A	1710.79	-0.0362705	0.119556	-0.303377	0.761603	0.907393	FALSE
ADAM2	0.339626	0.00699217	0.0443525	0.15765	0.874733	NA	TRUE
ADAM20	0	NA	NA	NA	NA	NA	FALSE
ADAM22	47.579	-0.6657	0.174348	-3.81822	0.000134416	0.00391863	TRUE
ADAM23	69.6544	-0.240812	0.14384	-1.67417	0.0940973	0.331028	TRUE
ADAM24	0	NA	NA	NA	NA	NA	FALSE
ADAM26A	0	NA	NA	NA	NA	NA	FALSE
ADAM28	0	NA	NA	NA	NA	NA	TRUE
ADAM30	1.59736	-0.0432174	0.0841664	-0.513476	0.607618	NA	TRUE
ADAM32	2.2389	0.0885897	0.108082	0.81965	0.412416	0.706697	TRUE
ADAM33	103.233	0.574373	0.166123	3.45752	0.000545174	0.0105725	TRUE
ADAM34	0	NA	NA	NA	NA	NA	FALSE
ADAM34L	0	NA	NA	NA	NA	NA	FALSE
ADAM3A	0	NA	NA	NA	NA	NA	FALSE
ADAM4	6.39571	0.142855	0.15941	0.896143	0.370176	0.670191	FALSE
ADAM4L1	14.81	0.151956	0.174289	0.871863	0.383283	0.681644	FALSE
ADAM5	0.332072	-0.0350301	0.0441465	-0.793497	0.427488	NA	FALSE
ADAM6	0	NA	NA	NA	NA	NA	FALSE
ADAM7	0	NA	NA	NA	NA	NA	FALSE
ADAM8	19.0362	-0.242828	0.173223	-1.40182	0.160968	0.444603	TRUE
ADAM9	1093.45	-0.227363	0.0704817	-3.22585	0.00125598	0.0191101	TRUE
ADAMDEC1	0	NA	NA	NA	NA	NA	TRUE
ADAMTS1	850.345	-0.165751	0.131404	-1.26139	0.20717	0.503847	TRUE
ADAMTS10	433.794	0.300919	0.0808104	3.72376	0.000196275	0.00512244	TRUE
ADAMTS12	397.931	-0.178615	0.138968	-1.28529	0.198691	0.493878	TRUE
ADAMTS14	31.4477	0.0602207	0.173019	0.348059	0.727796	0.89249	TRUE
ADAMTS15	217.173	0.027338	0.156932	0.174203	0.861706	0.95124	TRUE
ADAMTS16	0.88011	-0.0100155	0.0612063	-0.163636	0.870018	NA	TRUE
ADAMTS17	16.5126	-0.0369477	0.16961	-0.21784	0.827554	0.936686	TRUE
ADAMTS18	1.9903	0.0901472	0.101181	0.890951	0.372956	0.67271	TRUE
ADAMTS19	552.097	-0.201184	0.151523	-1.32774	0.184264	0.475717	TRUE
ADAMTS2	655.728	-0.0646815	0.10066	-0.642573	0.520501	0.779826	TRUE
ADAMTS20	9.94504	-0.0699836	0.159695	-0.438233	0.661218	0.858591	TRUE
ADAMTS3	37.1006	0.00290598	0.174357	0.0166669	0.986702	0.996344	TRUE
ADAMTS4	23.5351	-0.364053	0.166372	-2.18818	0.0286564	0.163536	TRUE
ADAMTS5	313.185	-0.0394127	0.142398	-0.27678	0.781949	0.916261	TRUE
ADAMTS6	108.546	-0.0124858	0.126634	-0.0985977	0.921458	0.976677	TRUE
ADAMTS7	851.706	0.702682	0.0772379	9.09762	9.23302e-20	1.4217e-16	TRUE
ADAMTS8	29.6785	-0.117847	0.174322	-0.676031	0.499021	0.767241	FALSE
ADAMTS9	534.047	0.227047	0.0915135	2.48102	0.0131006	0.0980262	TRUE
ADAMTSL1	78.8452	0.171182	0.136791	1.25142	0.210783	0.50912	TRUE
ADAMTSL2	98.6452	-0.198769	0.142378	-1.39607	0.162694	0.447111	TRUE
ADAMTSL3	277.412	-0.41091	0.129563	-3.17151	0.00151648	0.0219875	TRUE
ADAMTSL4	974.082	0.363799	0.0847735	4.29142	1.77533e-05	0.00081846	TRUE
ADAMTSL5	770.643	0.0333571	0.0770199	0.433097	0.664944	0.860049	TRUE
ADAP1	19.0704	-0.185655	0.175061	-1.06052	0.28891	0.594603	TRUE
ADAP2	80.9827	0.138805	0.152617	0.909498	0.363087	0.664376	TRUE
ADAR	1135.77	-0.131352	0.0770411	-1.70496	0.0882015	0.319109	TRUE
ADARB1	549.765	-0.118568	0.0979334	-1.2107	0.226011	0.52676	TRUE
ADARB2	2.87955	-0.238575	0.121726	-1.95994	0.0500026	0.228469	TRUE
ADAT1	30.4044	0.143505	0.172643	0.831223	0.405848	0.701236	TRUE
ADAT2	45.2929	-0.0931561	0.163056	-0.571315	0.567786	0.808841	TRUE
ADAT3	29.2698	0.0902173	0.166084	0.543204	0.586989	0.81894	TRUE
ADC	38.744	0.0453114	0.17102	0.264948	0.791049	0.919795	TRUE
ADCK1	206.097	0.0102325	0.104009	0.0983812	0.92163	0.976677	TRUE
ADCK2	206.848	0.0846969	0.105554	0.802405	0.422319	0.714813	TRUE
ADCK3	9490.01	0.0188136	0.0833256	0.225784	0.82137	0.933529	TRUE
ADCK4	150.33	0.0868891	0.119333	0.728123	0.466539	0.745977	TRUE
ADCK5	160.976	-0.0654134	0.134229	-0.487327	0.626027	0.840592	TRUE
ADCY1	426.825	-0.101523	0.166276	-0.610568	0.541485	0.793482	TRUE
ADCY10	15.3327	-0.0773656	0.16803	-0.460428	0.645209	0.849692	TRUE
ADCY2	24.4595	0.0136939	0.174355	0.0785403	0.937398	0.982021	FALSE
ADCY3	157.355	-0.250151	0.122409	-2.04356	0.0409967	0.203901	TRUE
ADCY4	305.945	0.373595	0.0891497	4.19065	2.78157e-05	0.00118076	TRUE
ADCY5	6634.3	-0.0521692	0.0868514	-0.600672	0.548059	0.796573	TRUE
ADCY6	2650.91	-0.0427996	0.101908	-0.419982	0.674498	0.864557	TRUE
ADCY7	112.718	-0.0869757	0.156729	-0.554944	0.578933	0.815055	TRUE
ADCY8	0.549448	-0.0666273	0.0494137	-1.34836	0.177543	NA	TRUE
ADCYAP1	1.4486	0.12383	0.0904257	1.36941	0.170872	NA	TRUE
ADCYAP1R1	228.98	0.163009	0.112772	1.44547	0.148325	0.425486	TRUE
ADD1	2505.27	-0.0255209	0.0591856	-0.431201	0.666322	0.860049	TRUE
ADD2	21.3468	-0.638799	0.154989	-4.12158	3.76287e-05	0.00148638	TRUE
ADD3	1597.71	-0.0706262	0.0807084	-0.875079	0.381531	0.680507	TRUE
ADGB	0.341486	-0.00938524	0.036177	-0.259426	0.795307	NA	TRUE
ADH1	138.635	0.0171265	0.174791	0.0979828	0.921946	0.976679	FALSE
ADH4	1.99235	0.0712244	0.11038	0.645268	0.518754	0.778915	FALSE
ADH5	1088.91	-0.0135474	0.0585828	-0.231253	0.817119	0.930828	TRUE
ADH6	0.987282	-0.0999212	0.0667386	-1.4972	0.13434	NA	FALSE
ADH6A	0	NA	NA	NA	NA	NA	FALSE
ADH7	9.49004	-0.342724	0.151723	-2.25888	0.023891	0.144734	FALSE
ADHFE1	1352.02	0.0785324	0.11683	0.672193	0.501461	0.768143	TRUE
ADI1	310.49	-0.174237	0.10501	-1.65924	0.0970674	0.337397	TRUE
ADIG	0	NA	NA	NA	NA	NA	FALSE
ADIPOQ	1.74692	0.059065	0.0922744	0.640102	0.522106	0.780827	TRUE
ADIPOR1	3286.23	-0.0142143	0.046431	-0.306138	0.759499	0.906656	TRUE
ADIPOR2	1705.41	-0.0497366	0.0831149	-0.598408	0.549568	0.797684	TRUE
ADK	2277.9	-0.297792	0.0847652	-3.51314	0.000442851	0.00901987	TRUE
ADM	206.998	0.0234163	0.143764	0.162881	0.870612	0.954455	FALSE
ADM2	0	NA	NA	NA	NA	NA	TRUE
ADNP	1447.94	-0.0893565	0.0593256	-1.50621	0.132014	0.401572	FALSE
ADNP2	296.821	0.0164723	0.0868305	0.189707	0.849539	0.94531	TRUE
ADO	50.3181	0.109336	0.156009	0.700829	0.48341	0.757486	TRUE
ADORA1	126.22	-0.318445	0.160011	-1.99014	0.0465753	0.219116	TRUE
ADORA2A	324.993	0.450733	0.0961111	4.68971	2.73593e-06	0.000182372	TRUE
ADORA2B	27.7755	-0.0527817	0.171699	-0.307409	0.758532	0.90626	TRUE
ADORA3	0	NA	NA	NA	NA	NA	TRUE
ADPGK	254.254	-0.0563612	0.104672	-0.538454	0.590263	0.82037	TRUE
ADPRH	344.152	0.0975249	0.0782089	1.24698	0.212405	0.510873	TRUE
ADPRHL1	8579.05	-0.231702	0.103747	-2.23333	0.0255272	0.150812	TRUE
ADPRHL2	532.016	0.00167122	0.0664288	0.0251581	0.979929	0.994555	TRUE
ADPRM	199.348	-0.00555395	0.102925	-0.0539612	0.956966	0.987536	TRUE
ADRA1A	1063.36	-0.337793	0.125862	-2.68383	0.00727844	0.0667103	TRUE
ADRA1B	1932.19	0.0403369	0.073973	0.545292	0.585552	0.818604	FALSE
ADRA1D	138.746	0.696036	0.166228	4.18723	2.82381e-05	0.00119126	TRUE
ADRA2A	3.12863	-0.142911	0.105511	-1.35447	0.175587	0.465672	TRUE
ADRA2B	19.4714	0.152504	0.174984	0.871531	0.383464	0.681792	TRUE
ADRA2C	39.7479	-1.07932	0.174815	-6.17407	6.65559e-10	1.42087e-07	FALSE
ADRB1	183.632	0.156869	0.124341	1.2616	0.207091	0.503837	TRUE
ADRB2	138.059	-0.00536072	0.110454	-0.0485336	0.961291	0.988267	FALSE
ADRB3	0	NA	NA	NA	NA	NA	TRUE
ADRBK1	996.524	-0.0101327	0.0569357	-0.177967	0.858749	0.949656	TRUE
ADRBK2	18.3081	-0.294444	0.162636	-1.81044	0.0702269	0.280879	TRUE
ADRM1	1267.94	0.164037	0.0630116	2.60328	0.00923376	0.0771887	TRUE
ADSL	1560.35	0.158104	0.0650103	2.43198	0.0150167	0.107298	TRUE
ADSS	343.226	-0.0205005	0.0896489	-0.228676	0.819121	0.93186	TRUE
ADSSL1	5393.89	0.165338	0.0986649	1.67576	0.0937862	0.330613	TRUE
ADTRP	13.2578	0.0813511	0.171647	0.473946	0.635539	0.844907	TRUE
AEBP1	690.823	-0.123452	0.0999534	-1.2351	0.216795	0.516485	TRUE
AEBP2	684.685	-0.0203584	0.0739816	-0.275182	0.783177	0.916992	FALSE
AEN	185.35	-0.00140461	0.109447	-0.0128337	0.98976	0.997273	TRUE
AES	16767.9	0.0161733	0.0505725	0.319805	0.749116	0.902644	TRUE
AFAP1	276.844	-0.148652	0.103826	-1.43174	0.152219	0.43181	TRUE
AFAP1L1	1660.33	0.187666	0.0979133	1.91665	0.0552822	0.244068	TRUE
AFAP1L2	230.837	0.0755203	0.118228	0.638766	0.522975	0.78146	TRUE
AFF1	1317.49	-0.452306	0.0834616	-5.41933	5.98232e-08	7.36926e-06	TRUE
AFF2	14.6468	-0.378058	0.173134	-2.18362	0.0289901	0.164476	TRUE
AFF3	78.406	-0.456016	0.164	-2.78058	0.00542618	0.0537314	TRUE
AFF4	1636.03	-0.135016	0.0873706	-1.54533	0.122266	0.383846	TRUE
AFG3L1	992.562	0.1141	0.102396	1.1143	0.265151	0.570461	FALSE
AFG3L2	3544.06	0.136852	0.0746604	1.83299	0.0668036	0.272852	TRUE
AFM	8.97845	-0.448393	0.115356	-3.88704	0.000101473	0.00318223	FALSE
AFMID	143.547	0.20652	0.157149	1.31417	0.188789	0.480731	TRUE
AFP	0.228471	-0.0156125	0.036177	-0.431558	0.666062	NA	TRUE
AFTPH	585.029	-0.072468	0.0640028	-1.13226	0.257524	0.562381	TRUE
AGA	226.908	-0.0656859	0.103401	-0.635253	0.525264	0.783082	TRUE
AGAP1	1370.86	0.00861114	0.0463178	0.185914	0.852512	0.946273	TRUE
AGAP2	302.258	0.469242	0.118563	3.95774	7.5662e-05	0.00256618	TRUE
AGAP3	753.906	0.225733	0.0713526	3.16363	0.00155817	0.0224574	TRUE
AGBL1	0.557708	-0.019119	0.0482666	-0.396113	0.692022	NA	TRUE
AGBL2	5.12521	-0.301447	0.146388	-2.05923	0.0394725	0.200065	FALSE
AGBL3	23.3619	0.172871	0.174092	0.992987	0.320716	0.625905	TRUE
AGBL4	5.22325	0.0914207	0.15138	0.603915	0.5459	0.795523	TRUE
AGBL5	111.108	-0.076634	0.136367	-0.561969	0.574137	0.812407	TRUE
AGER	83.2729	0.185722	0.136502	1.36058	0.173647	0.462838	TRUE
AGFG1	1110.95	-0.133565	0.0536554	-2.48931	0.012799	0.0970928	TRUE
AGFG2	599.505	0.0223394	0.0753725	0.296386	0.766935	0.910015	TRUE
AGGF1	561.888	-0.18237	0.086174	-2.1163	0.0343191	0.183016	TRUE
AGK	493.317	0.0150586	0.084325	0.178578	0.858269	0.949262	TRUE
AGL	7243.78	-0.176463	0.0924701	-1.90833	0.0563491	0.246283	TRUE
AGMAT	2.11373	-0.0984132	0.115904	-0.84909	0.395831	0.692523	TRUE
AGMO	15.2322	-0.439526	0.173904	-2.52741	0.0114908	0.089769	FALSE
AGO2	226.42	-0.112506	0.152873	-0.735949	0.461762	0.74271	TRUE
AGO3	50.4004	-0.191117	0.158214	-1.20797	0.227061	0.527581	TRUE
AGO4	98.0581	-0.691505	0.143199	-4.82897	1.37241e-06	0.000102584	TRUE
AGPAT1	1060.96	-0.0527926	0.0653956	-0.80728	0.419505	0.711883	TRUE
AGPAT2	355.611	0.302445	0.0978047	3.09234	0.00198585	0.0267527	TRUE
AGPAT3	1116.96	0.175797	0.10419	1.68727	0.0915513	0.325567	TRUE
AGPAT4	101.926	0.0980719	0.130777	0.749915	0.453306	0.736852	TRUE
AGPAT5	528.996	0.0506498	0.0887451	0.570733	0.568181	0.809029	TRUE
AGPAT6	870.094	0.155208	0.0527408	2.94285	0.00325208	0.0374536	TRUE
AGPAT9	213.174	-0.151907	0.129245	-1.17534	0.239858	0.544049	TRUE
AGPS	296.182	-0.179927	0.106632	-1.68737	0.0915326	0.325567	TRUE
AGR2	6.54026	-0.195743	0.0879974	-2.22441	NA	NA	TRUE
AGR3	0	NA	NA	NA	NA	NA	FALSE
AGRN	1640.25	0.21722	0.0731927	2.96778	0.00299959	0.0356112	TRUE
AGRP	0.879632	0.0448006	0.068099	0.657874	0.510619	NA	TRUE
AGT	21.7946	-0.443277	0.174907	-2.53436	0.0112654	0.088772	FALSE
AGTPBP1	4125.09	-0.00177322	0.0611129	-0.0290155	0.976852	0.993686	TRUE
AGTR1A	33.2337	-0.09024	0.166713	-0.541289	0.588308	0.819353	FALSE
AGTR1B	0.108688	-0.00782843	0.036177	-0.216393	0.828682	NA	FALSE
AGTR2	0	NA	NA	NA	NA	NA	FALSE
AGTRAP	173.783	-0.0475788	0.118305	-0.402171	0.687558	0.871907	TRUE
AGXT	1.34154	-0.1294	0.0675867	-1.91458	0.0555464	NA	TRUE
AGXT2	2.12262	-0.179339	0.0784919	-2.28482	0.0223236	0.138723	TRUE
AHCTF1	760.326	0.0300955	0.0763446	0.394206	0.693429	0.875101	TRUE
AHCY	515.17	-0.106411	0.0787774	-1.35078	0.176765	0.467186	FALSE
AHCYL1	1879.24	0.0437484	0.0558862	0.782812	0.433738	0.724106	TRUE
AHCYL2	114.555	-0.1575	0.121661	-1.29457	0.195467	0.489833	TRUE
AHDC1	977.079	0.0385529	0.0808176	0.477037	0.633336	0.844006	TRUE
AHI1	387.279	0.235736	0.104577	2.2542	0.0241839	0.145918	TRUE
AHNAK	14001.6	0.231035	0.0716005	3.22672	0.00125219	0.0190903	TRUE
AHNAK2	197.612	0.144672	0.146904	0.984806	0.324719	0.629806	TRUE
AHR	153.301	0.22739	0.137159	1.65786	0.0973462	0.337958	TRUE
AHRR	10.6653	-0.00849912	0.171082	-0.0496785	0.960379	0.988113	TRUE
AHSA1	2243.29	0.0624707	0.0461593	1.35337	0.175937	0.465921	TRUE
AHSA2	300.116	0.0581397	0.108986	0.533459	0.593716	0.82257	TRUE
AHSG	104.105	-0.0584982	0.0461743	-1.2669	0.205191	0.501337	TRUE
AHSP	15.5004	-0.440917	0.122897	-3.5877	0.00033361	0.00738064	TRUE
AICDA	0.111704	0.00618284	0.036177	0.170906	0.864298	NA	TRUE
AIDA	557.838	-0.183621	0.0782261	-2.34732	0.0189091	0.124802	TRUE
AIF1	72.7428	-0.217169	0.172041	-1.26231	0.206838	0.5037	TRUE
AIF1L	561.418	-0.356512	0.165005	-2.16062	0.030725	0.171433	TRUE
AIFM1	3059.25	0.101139	0.069573	1.45371	0.146025	0.421947	TRUE
AIFM2	248.681	0.00939567	0.12191	0.0770706	0.938567	0.982536	TRUE
AIFM3	9.95422	0.300824	0.169474	1.77505	0.0758898	0.294715	TRUE
AIG1	124.973	-0.382994	0.124888	-3.06669	0.00216447	0.0285591	TRUE
AIM1	50.5951	-0.0809741	0.171238	-0.472876	0.636302	0.845365	TRUE
AIM1L	6.48589	-0.000521241	0.146016	-0.00356977	0.997152	0.998909	TRUE
AIM2	10.3179	-0.0698393	0.147572	-0.473256	0.636031	0.845223	TRUE
AIMP1	619.147	0.159904	0.0748665	2.13585	0.0326917	0.177813	TRUE
AIMP2	619.279	0.130974	0.0709444	1.84615	0.0648705	0.268083	TRUE
AIP	655.326	0.0834175	0.072491	1.15073	0.249844	0.555136	TRUE
AIPL1	0	NA	NA	NA	NA	NA	TRUE
AIRE	0	NA	NA	NA	NA	NA	TRUE
AJAP1	16.2152	-0.287934	0.175	-1.64533	0.0999013	0.34339	TRUE
AJUBA	231.081	0.204317	0.100441	2.03421	0.0419309	0.206322	TRUE
AK1	5761.44	0.0755294	0.0608358	1.24153	0.21441	0.513423	TRUE
AK2	741.099	0.260271	0.116512	2.23385	0.0254929	0.150687	TRUE
AK3	1436.09	0.0640866	0.0689185	0.92989	0.352428	0.654685	TRUE
AK4	2251.93	-0.0644891	0.0925263	-0.696981	0.485815	0.758978	TRUE
AK5	0.557542	0.00474951	0.0482272	0.0984821	0.92155	NA	TRUE
AK6	220.595	-0.121473	0.110389	-1.10041	0.271152	0.577629	FALSE
AK7	0.229467	-0.0016012	0.036177	-0.0442602	0.964697	NA	TRUE
AK8	0.111704	0.00618284	0.036177	0.170906	0.864298	NA	TRUE
AKAP1	6284.8	0.0703545	0.0485386	1.44945	0.147211	0.423533	TRUE
AKAP10	496.24	0.0752243	0.0804275	0.935306	0.349631	0.651612	TRUE
AKAP11	1606.17	-0.112097	0.0636376	-1.76149	0.0781559	0.298657	TRUE
AKAP12	951.241	-0.195835	0.111381	-1.75824	0.0787059	0.29946	TRUE
AKAP13	2828.41	-0.244493	0.0786991	-3.10668	0.00189201	0.0258501	TRUE
AKAP14	0.657327	0.0224475	0.0650127	0.345279	0.729884	NA	TRUE
AKAP17A	976.178	0.0786332	0.0606958	1.29553	0.195138	0.48937	TRUE
AKAP17B	242.004	-0.1123	0.0979011	-1.14708	0.251349	0.556251	FALSE
AKAP2	5622.66	-0.163557	0.0674795	-2.42381	0.0153587	0.108833	TRUE
AKAP3	7.41187	-0.624953	0.138912	-4.49893	6.82977e-06	0.00037829	TRUE
AKAP4	3.64693	0.0957894	0.12407	0.772059	0.44008	0.727769	TRUE
AKAP5	7.61383	-0.0143628	0.146261	-0.0982003	0.921773	0.976677	TRUE
AKAP6	6447.74	-0.0229313	0.0542226	-0.42291	0.672361	0.863544	TRUE
AKAP7	184.154	-0.0298438	0.124007	-0.240663	0.809816	0.928416	TRUE
AKAP8	809.916	0.11716	0.0743065	1.57671	0.114863	0.371413	TRUE
AKAP8L	732.432	0.115705	0.08242	1.40385	0.160365	0.443559	TRUE
AKAP9	1723.36	0.0211153	0.113011	0.186843	0.851784	0.946104	TRUE
AKD2	0	NA	NA	NA	NA	NA	FALSE
AKIP1	297.392	-0.0511519	0.169443	-0.301883	0.762741	0.907697	TRUE
AKIRIN1	692.704	-0.0858083	0.083324	-1.02981	0.303097	0.608095	FALSE
AKIRIN2	770.195	-0.0326202	0.075686	-0.430994	0.666473	0.860049	TRUE
AKNA	168.094	-0.247228	0.11564	-2.1379	0.0325246	0.177405	TRUE
AKNAD1	0.116161	-0.00782843	0.036177	-0.216393	0.828682	NA	TRUE
AKP3	0	NA	NA	NA	NA	NA	FALSE
AKR1A1	4586.03	-0.0784619	0.0389513	-2.01436	0.043972	0.212132	TRUE
AKR1B1	5356.24	-0.0411007	0.0591881	-0.694408	0.487426	0.760101	TRUE
AKR1B10	34.31	-0.476114	0.168591	-2.82407	0.00474182	0.0487089	TRUE
AKR1B7	0.558786	-0.0247406	0.0558173	-0.443242	0.657591	NA	FALSE
AKR1B8	69.8639	0.303506	0.174893	1.73538	0.0826739	0.307647	FALSE
AKR1C1	0.326754	-0.0233965	0.036177	-0.646724	0.51781	NA	TRUE
AKR1C12	16.5324	0.0758268	0.161381	0.469862	0.638454	0.846617	FALSE
AKR1C12L1	0.336324	-0.00938524	0.036177	-0.259426	0.795307	NA	FALSE
AKR1C13	3.48402	-0.30113	0.108659	-2.77132	0.0055829	0.054895	FALSE
AKR1C14	596.209	-0.445863	0.0956969	-4.65912	3.17562e-06	0.000207196	FALSE
AKR1C19	132.101	0.268689	0.167647	1.6027	0.109001	0.360479	FALSE
AKR1C2	1.36959	-0.117483	0.064564	-1.81963	0.0688152	NA	TRUE
AKR1C3	5.48433	-0.00217916	0.135667	-0.0160626	0.987184	0.996506	FALSE
AKR1CL	6264.43	-0.130183	0.0423502	-3.07398	0.00211227	0.028087	FALSE
AKR1D1	23.757	-0.633556	0.161055	-3.9338	8.36145e-05	0.00275695	TRUE
AKR1E2	296.539	0.479308	0.0859257	5.57817	2.43064e-08	3.25452e-06	TRUE
AKR7A2	581.036	0.0636348	0.0762264	0.834813	0.403823	0.699602	TRUE
AKR7A3	7.9959	-0.314813	0.163796	-1.92199	0.0546074	0.242528	FALSE
AKT1	5256.8	-0.0560444	0.0683183	-0.820342	0.412021	0.706373	TRUE
AKT1S1	849.769	0.152158	0.0569337	2.67255	0.00752772	0.0680149	TRUE
AKT2	3971.29	-0.00622614	0.0657566	-0.0946847	0.924565	0.97806	TRUE
AKT3	152.213	-0.0380778	0.1126	-0.338168	0.735236	0.896291	TRUE
AKTIP	914.892	0.0966638	0.0740344	1.30566	0.191668	0.484237	TRUE
ALAD	619.431	0.148083	0.0749603	1.97548	0.0482137	0.223748	TRUE
ALAS1	7425.96	0.0248213	0.0781358	0.317668	0.750737	0.903119	FALSE
ALAS2	784.5	-0.54922	0.141811	-3.87291	NA	NA	TRUE
ALB	951.021	-0.120291	0.0650535	-1.84911	0.0644413	0.267393	TRUE
ALCAM	129.281	-0.222713	0.149705	-1.48768	0.136836	0.408658	TRUE
ALDH16A1	392.853	0.107937	0.0881535	1.22442	0.220794	0.52224	TRUE
ALDH18A1	182.657	0.0706927	0.131718	0.536699	0.591475	0.821137	TRUE
ALDH1A1	1046.44	0.311839	0.137396	2.26964	0.0232293	0.142221	TRUE
ALDH1A2	44.3393	-0.385884	0.17379	-2.2204	0.0263917	0.154517	TRUE
ALDH1A3	26.3636	-0.372026	0.171157	-2.1736	0.0297354	0.16741	TRUE
ALDH1A7	0.11231	-0.00782843	0.036177	-0.216393	0.828682	NA	FALSE
ALDH1B1	1.42569	-0.0993652	0.0878175	-1.1315	0.257846	NA	FALSE
ALDH1L1	21.6309	-0.874225	0.174522	-5.00927	5.46372e-07	4.58225e-05	TRUE
ALDH1L2	20.7981	-0.101697	0.174991	-0.581154	0.561137	0.804864	TRUE
ALDH2	15581.8	-0.0256715	0.0638394	-0.402126	0.687591	0.871907	TRUE
ALDH3A1	57.624	-0.25901	0.174287	-1.48611	0.13725	0.409256	TRUE
ALDH3A2	787.702	-0.210935	0.0988504	-2.13389	0.0328521	0.17837	TRUE
ALDH3B1	27.6088	0.128994	0.167099	0.771961	0.440137	0.727769	TRUE
ALDH3B2	0	NA	NA	NA	NA	NA	FALSE
ALDH4A1	2316.81	-0.518612	0.0788544	-6.57682	4.80613e-11	1.45108e-08	TRUE
ALDH5A1	1629.81	-0.124901	0.0800037	-1.5612	0.118478	0.378725	TRUE
ALDH6A1	17983	-0.183886	0.0931838	-1.97337	0.0484538	0.224358	TRUE
ALDH7A1	1589.41	0.0842185	0.0703041	1.19792	0.230949	0.532838	TRUE
ALDH8A1	5.58896	-0.303	0.108575	-2.79071	0.00525924	0.0525521	TRUE
ALDH9A1	2836.2	-0.025694	0.0453601	-0.566445	0.571091	0.810597	FALSE
ALDOA	42217.2	0.0810095	0.0624856	1.29645	0.19482	0.488893	TRUE
ALDOART2	1.86084	-0.0175107	0.110585	-0.158346	0.874184	0.955811	FALSE
ALDOB	64.8348	-0.329398	0.171459	-1.92115	0.0547132	0.242648	TRUE
ALDOC	46.5116	-0.274854	0.161525	-1.70162	0.0888262	0.32009	TRUE
ALG1	54.8333	0.108841	0.143297	0.759549	0.447524	0.732303	TRUE
ALG10	210.098	-0.192289	0.131479	-1.4625	0.143603	0.41798	TRUE
ALG11	392.223	0.0457937	0.0869249	0.526819	0.598319	0.825456	TRUE
ALG12	127.037	0.158178	0.128112	1.23468	0.216948	0.516485	TRUE
ALG13	167.987	0.036513	0.11049	0.330464	0.741049	0.898479	TRUE
ALG14	307.041	-0.0106383	0.0990607	-0.107392	0.914478	0.973974	TRUE
ALG2	307.965	-0.266267	0.135708	-1.96206	0.0497559	0.227747	TRUE
ALG3	261.535	0.00275839	0.0950539	0.0290192	0.976849	0.993686	TRUE
ALG5	126.859	-0.00834466	0.12222	-0.0682756	0.945566	0.983826	TRUE
ALG6	177.883	0.0261441	0.13811	0.1893	0.849858	0.945369	TRUE
ALG8	35.696	0.234874	0.163913	1.43292	0.15188	0.431418	TRUE
ALG9	116.702	-0.145208	0.125806	-1.15422	0.248409	0.553065	TRUE
ALK	3.19829	-0.0420991	0.132345	-0.318101	0.750409	0.903119	TRUE
ALKBH1	447.265	-0.0499235	0.0770702	-0.647766	0.517136	0.777776	TRUE
ALKBH2	74.9303	-0.270331	0.170352	-1.58689	0.112537	0.367205	TRUE
ALKBH3	2051.52	0.0239123	0.0521808	0.458259	0.646767	0.85039	TRUE
ALKBH4	46.8677	0.228301	0.164106	1.39118	0.164172	0.449168	TRUE
ALKBH5	498.464	-0.125146	0.108459	-1.15386	0.248558	0.553238	TRUE
ALKBH6	0	NA	NA	NA	NA	NA	TRUE
ALKBH7	639.793	0.250406	0.0676298	3.7026	0.000213402	0.00544935	TRUE
ALKBH8	56.472	0.00443789	0.146378	0.0303181	0.975813	0.993034	TRUE
ALLC	0.22685	0.0124101	0.036177	0.343038	0.73157	NA	FALSE
ALMS1	248.31	0.0938195	0.100304	0.935348	0.349609	0.651612	TRUE
ALOX12	19.0537	-0.094818	0.173056	-0.547904	0.583758	0.818069	TRUE
ALOX12B	0	NA	NA	NA	NA	NA	TRUE
ALOX12E	0.665149	-0.0714221	0.0605334	-1.17988	0.238048	NA	FALSE
ALOX15	34.3736	-0.567311	0.166394	-3.40945	0.00065093	0.0119749	TRUE
ALOX15B	0	NA	NA	NA	NA	NA	FALSE
ALOX5	44.9733	-0.0595618	0.174274	-0.341771	0.732523	0.895008	TRUE
ALOX5AP	40.9017	-0.51825	0.174523	-2.96953	0.00298255	0.0354955	FALSE
ALOXE3	170.181	0.0266582	0.1726	0.154451	0.877254	0.956858	TRUE
ALPI	0	NA	NA	NA	NA	NA	TRUE
ALPK1	117.177	-0.285826	0.130692	-2.18701	0.0287416	0.16373	TRUE
ALPK2	4201.98	-0.101669	0.140592	-0.723152	0.469587	0.748907	TRUE
ALPK3	6484.6	0.000764036	0.116569	0.00655437	0.99477	0.99854	TRUE
ALPL	636.022	0.0378046	0.143498	0.26345	0.792204	0.920052	TRUE
ALPP	2.24588	0.0610434	0.10957	0.557116	0.577448	0.814198	FALSE
ALPPL2	40.0322	0.367447	0.174752	2.10268	0.0354935	0.186839	FALSE
ALS2	344.673	0.132298	0.10076	1.313	0.189183	0.481096	TRUE
ALS2CL	356.214	0.449027	0.0965469	4.65087	3.30545e-06	0.000212959	TRUE
ALS2CR11	0	NA	NA	NA	NA	NA	TRUE
ALS2CR12	1.54327	0.0278501	0.0840392	0.331394	0.740347	NA	TRUE
ALX1	0.11231	-0.00782843	0.036177	-0.216393	0.828682	NA	TRUE
ALX3	42.5841	0.115939	0.122925	0.943169	0.345595	0.648853	TRUE
ALX4	2.80296	-0.0204542	0.106555	-0.191959	0.847775	0.944663	TRUE
ALYREF	435.471	-0.0238153	0.0849231	-0.280433	0.779145	0.915585	TRUE
AMACR	423.783	0.0937952	0.0848382	1.10558	0.26891	0.574934	TRUE
AMBN	0	NA	NA	NA	NA	NA	TRUE
AMBP	38.9807	-0.150205	0.0720084	-2.08594	0.036984	0.191872	TRUE
AMBRA1	633.965	-0.0311294	0.0732323	-0.425078	0.67078	0.862527	TRUE
AMD1	2948.77	-0.197774	0.165909	-1.19206	0.233238	0.53627	TRUE
AMDHD1	2.02194	-0.196576	0.091575	-2.14661	0.0318242	0.175323	TRUE
AMDHD2	60.2812	0.0396182	0.15126	0.261921	0.793382	0.920674	TRUE
AMELX	0.11231	-0.00782843	0.036177	-0.216393	0.828682	NA	FALSE
AMER1	88.5707	0.0817726	0.149602	0.5466	0.584654	0.818529	TRUE
AMER2	0	NA	NA	NA	NA	NA	TRUE
AMER3	0	NA	NA	NA	NA	NA	TRUE
AMFR	5962.67	-0.0364457	0.0705349	-0.516705	0.605362	0.828713	TRUE
AMH	2.03278	-0.00222309	0.0907207	-0.0245047	0.98045	0.994555	TRUE
AMHR2	148.299	0.176761	0.144758	1.22108	0.222056	0.523296	TRUE
AMICA1	8.15353	-0.18973	0.139325	-1.36178	0.173269	0.462315	TRUE
AMIGO1	1296.04	-0.152214	0.0784993	-1.93905	0.0524952	0.236767	TRUE
AMIGO2	175.38	0.0790486	0.155138	0.509537	0.610376	0.832159	TRUE
AMIGO3	28.9772	0.0265012	0.171564	0.154468	0.877241	0.956858	TRUE
AMMECR1	86.2989	-0.178281	0.129109	-1.38086	0.167322	0.453436	TRUE
AMMECR1L	532.153	0.0737069	0.0918528	0.802446	0.422295	0.714813	TRUE
AMN	0.109164	0.00618284	0.036177	0.170906	0.864298	NA	TRUE
AMN1	137.514	0.0356431	0.137548	0.259132	0.795534	0.92217	TRUE
AMOT	106.441	-0.143502	0.153827	-0.932876	0.350884	0.653311	TRUE
AMOTL1	2550.23	0.0469286	0.0546084	0.859365	0.390139	0.688566	TRUE
AMOTL2	1999.96	0.190885	0.104748	1.82232	0.0684066	0.276705	TRUE
AMPD1	34.6521	-0.567255	0.173557	-3.26841	0.00108155	0.0172042	TRUE
AMPD2	193.098	0.101583	0.107225	0.947386	0.343442	0.646178	TRUE
AMPD3	1468.85	-0.0161302	0.124479	-0.129581	0.896898	0.965466	TRUE
AMPH	8.57171	-0.0193059	0.161952	-0.119208	0.905111	0.969334	TRUE
AMT	170.338	0.202527	0.10506	1.92773	0.0538892	0.240558	TRUE
AMTN	0	NA	NA	NA	NA	NA	FALSE
AMY1A	11.3351	-0.146876	0.13461	-1.09112	0.275219	0.58148	TRUE
AMY2A3	0	NA	NA	NA	NA	NA	FALSE
AMZ1	116.526	-0.179572	0.131166	-1.36905	0.170984	0.458917	TRUE
AMZ2	1407.97	-0.0205141	0.0581208	-0.352957	0.724121	0.890789	TRUE
ANAPC1	650.457	0.0846287	0.0904191	0.93596	0.349294	0.651612	TRUE
ANAPC10	158.017	-0.0438355	0.102986	-0.425644	0.670367	0.862277	TRUE
ANAPC11	611.751	0.0240728	0.0646011	0.372637	0.709418	0.883282	TRUE
ANAPC13	902.266	0.0788779	0.0813747	0.969318	0.332387	0.636974	TRUE
ANAPC15	254.977	-0.0525602	0.102169	-0.514442	0.606943	0.829918	TRUE
ANAPC16	462.271	-0.137798	0.088651	-1.55439	0.120092	0.380566	TRUE
ANAPC2	735.506	0.0414294	0.0738466	0.56102	0.574784	0.812536	TRUE
ANAPC4	708.482	0.157349	0.0802479	1.96079	0.0499038	0.228288	TRUE
ANAPC5	5899.77	0.0493491	0.0488377	1.01047	0.31227	0.617878	TRUE
ANAPC7	709.493	-0.0808486	0.0756279	-1.06903	0.285056	0.590275	TRUE
ANDPRO	0	NA	NA	NA	NA	NA	FALSE
ANG	0	NA	NA	NA	NA	NA	FALSE
ANG1	14.8077	-0.316191	0.170126	-1.85857	0.0630878	0.264318	FALSE
ANG2	0	NA	NA	NA	NA	NA	FALSE
ANGEL1	223.351	-0.21182	0.105227	-2.01298	0.0441171	0.212439	TRUE
ANGEL2	710.673	-0.0297998	0.0610881	-0.487816	0.62568	0.840592	TRUE
ANGPT1	1088.97	-0.366619	0.174706	-2.0985	0.0358612	0.188397	TRUE
ANGPT2	216.059	0.311552	0.145811	2.13668	0.0326238	0.177692	TRUE
ANGPT4	0.328011	0.00686636	0.0439583	0.156202	0.875874	NA	TRUE
ANGPTL1	212.8	0.270145	0.117112	2.30674	0.0210696	0.13373	TRUE
ANGPTL2	650.012	0.105304	0.0899967	1.17009	0.241967	0.546119	TRUE
ANGPTL3	6.79445	-0.0856156	0.0554311	-1.54454	0.122458	0.384034	TRUE
ANGPTL4	33.5426	0.077304	0.137579	0.561887	0.574193	0.812407	TRUE
ANGPTL6	1.46751	0.0726602	0.099649	0.729161	0.465903	NA	TRUE
ANK1	1647.17	-0.0444827	0.0716205	-0.621089	0.534541	0.789899	TRUE
ANK2	2911.66	-0.0643122	0.0583465	-1.10225	0.270355	0.576502	TRUE
ANK3	1133.08	-0.294112	0.0776651	-3.78693	0.000152521	0.00434106	TRUE
ANKAR	15.2277	0.0777668	0.173287	0.448776	0.653594	0.853608	TRUE
ANKDD1A	8.79864	-0.0833484	0.145639	-0.572296	0.567122	0.808568	TRUE
ANKDD1B	37.5264	0.0275266	0.173067	0.159052	0.873628	0.955475	TRUE
ANKEF1	0	NA	NA	NA	NA	NA	TRUE
ANKFY1	941.535	-0.000721282	0.0704388	-0.0102398	0.99183	0.998009	TRUE
ANKH	3087.26	0.0737735	0.0712107	1.03599	0.300207	0.605584	TRUE
ANKHD1	811.453	0.00285842	0.0872939	0.0327448	0.973878	0.992574	TRUE
ANKIB1	641.826	-0.154939	0.0795813	-1.94693	0.0515435	0.234051	TRUE
ANKK1	0	NA	NA	NA	NA	NA	TRUE
ANKLE1	8.61393	0.259759	0.155587	1.66954	0.0950097	0.332718	FALSE
ANKLE2	333.175	-0.032254	0.0951247	-0.339071	0.734556	0.895755	TRUE
ANKMY1	1275.07	0.0582256	0.100587	0.578856	0.562687	0.806231	TRUE
ANKMY2	1926.79	-0.369722	0.0731729	-5.05272	4.35571e-07	3.81075e-05	TRUE
ANKRA2	0.336929	-0.0233965	0.036177	-0.646724	0.51781	NA	TRUE
ANKRD1	89949.6	-0.151407	0.148022	-1.02287	0.306372	0.612107	TRUE
ANKRD10	816.511	0.214665	0.0819649	2.61898	0.00881926	0.07511	TRUE
ANKRD11	2971.54	0.0127132	0.0532791	0.238615	0.811404	0.928825	TRUE
ANKRD12	407.965	0.0715143	0.0835147	0.856308	0.391827	0.68929	TRUE
ANKRD13A	1187.9	-0.0256523	0.0779655	-0.329021	0.74214	0.899201	TRUE
ANKRD13B	160.446	0.408697	0.145865	2.80188	0.00508056	0.0515692	TRUE
ANKRD13C	631.097	-0.0592146	0.0670948	-0.882551	0.377479	0.676599	TRUE
ANKRD13D	14.6013	0.00198799	0.169183	0.0117505	0.990625	0.997494	TRUE
ANKRD16	31.6137	0.0646946	0.164021	0.394429	0.693264	0.875101	TRUE
ANKRD17	1609.23	-0.041333	0.0680399	-0.607482	0.543531	0.794741	TRUE
ANKRD2	4.2085	-0.230167	0.135578	-1.69767	0.0895701	0.32164	TRUE
ANKRD22	0.218242	0.0124101	0.036177	0.343038	0.73157	NA	TRUE
ANKRD23	1246.03	0.00941978	0.17352	0.0542865	0.956707	0.987536	TRUE
ANKRD24	0.437254	0.0177278	0.0460759	0.384753	0.700421	NA	TRUE
ANKRD26	96.3548	0.0385011	0.130424	0.2952	0.767841	0.910599	TRUE
ANKRD27	370.375	0.0575258	0.0869235	0.661798	0.508101	0.772623	TRUE
ANKRD28	1338.43	0.0293527	0.0977133	0.300397	0.763875	0.908554	TRUE
ANKRD29	10.8672	-0.0333965	0.170835	-0.195489	0.84501	0.943433	TRUE
ANKRD32	134.1	-0.0166373	0.122719	-0.135572	0.89216	0.96383	TRUE
ANKRD33B	52.787	-0.284946	0.174222	-1.63554	0.101936	0.346645	TRUE
ANKRD34A	58.1643	0.0567192	0.15407	0.368138	0.71277	0.885389	TRUE
ANKRD34B	1.10653	-0.0991706	0.0749938	-1.32238	0.186041	NA	FALSE
ANKRD34C	0	NA	NA	NA	NA	NA	TRUE
ANKRD35	8.93738	-0.168028	0.164681	-1.02033	0.307573	0.613577	TRUE
ANKRD36	1.82374	0.0581971	0.0903315	0.644261	0.519406	0.779514	FALSE
ANKRD37	20.2577	-0.0701256	0.172561	-0.406382	0.684462	0.870181	TRUE
ANKRD39	31.1372	0.344017	0.170844	2.01364	0.0440476	0.21235	FALSE
ANKRD40	3046.31	-0.0938032	0.0665213	-1.41012	0.158504	0.440867	TRUE
ANKRD42	46.9666	-0.0539035	0.15864	-0.339784	0.734019	0.895738	TRUE
ANKRD44	178.004	0.00459125	0.113721	0.0403731	0.967796	0.990105	TRUE
ANKRD45	97.2364	0.171763	0.170692	1.00627	0.314283	0.619703	TRUE
ANKRD46	933.107	-0.00412292	0.0750118	-0.0549636	0.956167	0.987536	TRUE
ANKRD49	213.071	0.0630875	0.0938843	0.671971	0.501602	0.768143	TRUE
ANKRD50	795.902	-0.0753912	0.0892969	-0.844275	0.398516	0.695006	TRUE
ANKRD52	496.734	-0.0431481	0.125642	-0.343421	0.731282	0.894448	TRUE
ANKRD54	135.171	-0.00950095	0.125829	-0.0755068	0.939811	0.9827	TRUE
ANKRD55	12.4638	-0.0248643	0.172061	-0.144509	0.885099	0.961206	TRUE
ANKRD6	733.59	-0.187372	0.174264	-1.07522	0.282276	0.587381	TRUE
ANKRD60	0.212144	0.0124101	0.036177	0.343038	0.73157	NA	FALSE
ANKRD61	6.40292	0.177278	0.145325	1.21988	0.222512	0.523695	TRUE
ANKRD63	93.1476	-0.0281851	0.135802	-0.207546	0.835583	0.939336	FALSE
ANKRD65	0	NA	NA	NA	NA	NA	TRUE
ANKRD66	3.74484	-0.271099	0.127495	-2.12636	0.0334734	0.180508	TRUE
ANKRD7	0.330631	0.00462604	0.036177	0.127872	0.89825	NA	FALSE
ANKRD9	1105.83	0.000928981	0.0919354	0.0101047	0.991938	0.99803	TRUE
ANKS1A	2559.33	0.165446	0.0876742	1.88706	0.0591522	0.253426	TRUE
ANKS1B	3.33695	0.0718183	0.128183	0.560278	0.57529	0.812764	TRUE
ANKS3	153.469	-0.0645595	0.102628	-0.629065	0.529306	0.786173	TRUE
ANKS4B	41.9539	-0.325878	0.172387	-1.89039	0.0587054	0.252287	TRUE
ANKS6	58.2443	0.240085	0.150875	1.59129	0.111545	0.365519	TRUE
ANKUB1	3.29838	0.0804748	0.134462	0.598495	0.54951	0.797684	TRUE
ANKZF1	310.16	0.122426	0.0853381	1.4346	0.151401	0.431018	TRUE
ANLN	7.7192	0.12251	0.161525	0.758455	0.448179	0.732985	TRUE
ANLNL1	2.51146	0.0522956	0.0887768	0.589069	0.555815	0.802187	FALSE
ANO1	258.23	0.119136	0.100659	1.18356	0.236586	0.54106	TRUE
ANO10	1335.99	0.219027	0.123403	1.7749	0.0759151	0.294715	TRUE
ANO3	1.6393	-0.0106628	0.0942262	-0.113161	0.909903	NA	TRUE
ANO4	42.78	0.322514	0.169772	1.89969	0.0574741	0.249151	TRUE
ANO5	1369	-0.4253	0.150218	-2.83121	0.00463719	0.047954	TRUE
ANO6	712.088	0.0914064	0.0696271	1.3128	0.18925	0.481096	TRUE
ANO7	3.66444	-0.235333	0.134819	-1.74555	0.0808899	0.304236	FALSE
ANO8	474.604	0.138039	0.0757823	1.82152	0.0685278	0.276953	TRUE
ANO9	0.459172	-0.00527836	0.0465993	-0.113271	0.909815	NA	TRUE
ANP32A	216.767	-0.232746	0.0976338	-2.38386	0.017132	0.116829	TRUE
ANP32B	1033.31	-0.00354748	0.0645943	-0.0549194	0.956203	0.987536	TRUE
ANP32E	3516.6	-0.313287	0.0882229	-3.55108	0.000383653	0.00813182	TRUE
ANPEP	194.737	-0.181689	0.144347	-1.2587	0.20814	0.505113	TRUE
ANTXR1	148.858	-0.494954	0.125178	-3.954	7.68554e-05	0.00258954	FALSE
ANTXR2	1322.3	-0.0538222	0.0799354	-0.673322	0.500743	0.7679	TRUE
ANTXRL	0	NA	NA	NA	NA	NA	TRUE
ANXA1	712.766	-0.0757077	0.134255	-0.563908	0.572817	0.811811	TRUE
ANXA10	78.4062	0.0305615	0.146399	0.208755	0.834639	0.939336	FALSE
ANXA11	4688.59	0.0144041	0.0700844	0.205525	0.837162	0.939577	TRUE
ANXA13	4.65424	0.0163255	0.13202	0.123659	0.901585	0.967786	TRUE
ANXA2	1879.28	-0.186457	0.138533	-1.34594	0.178323	0.46793	TRUE
ANXA3	1369.62	-0.184473	0.0803557	-2.29571	0.0216927	0.136281	TRUE
ANXA4	936.717	-0.203735	0.0729268	-2.79369	0.00521096	0.0523066	TRUE
ANXA5	4615.92	0.0686602	0.114432	0.600008	0.548501	0.796776	TRUE
ANXA6	4796.7	-0.0905908	0.0577484	-1.56871	0.116714	0.374723	TRUE
ANXA7	609.619	-0.413388	0.086961	-4.75372	1.99704e-06	0.000139979	TRUE
ANXA8	3.33387	0.00927324	0.117655	0.0788171	0.937178	0.982021	FALSE
ANXA9	1.65709	-0.0664731	0.0922345	-0.720697	0.471096	NA	TRUE
AOAH	6.39255	-0.197063	0.137799	-1.43008	0.152695	0.432682	TRUE
AOC1	0.108688	-0.00782843	0.036177	-0.216393	0.828682	NA	FALSE
AOC3	2093.88	0.0682366	0.0994423	0.686193	0.492591	0.762716	TRUE
AOX1	165.55	-0.529716	0.140227	-3.77756	0.000158372	0.00445178	TRUE
AOX2	0.785819	0.0427007	0.0738438	0.578258	0.56309	NA	FALSE
AOX3	142.41	-0.272017	0.148158	-1.83599	0.0663587	0.271608	FALSE
AOX4	0	NA	NA	NA	NA	NA	FALSE
AP1AR	473.345	-0.0258282	0.08449	-0.305696	0.759836	0.906708	TRUE
AP1B1	1135.31	0.438461	0.0526613	8.32606	8.35781e-17	7.57021e-14	TRUE
AP1G1	806.844	-0.107749	0.0798162	-1.34996	0.177027	0.467263	TRUE
AP1M1	551.818	0.201001	0.0717696	2.80065	0.00510001	0.0515956	TRUE
AP1M2	0.334539	0.00693739	0.0441813	0.157021	0.875228	NA	TRUE
AP1S1	214.689	-0.0644685	0.0945112	-0.682125	0.49516	0.764741	FALSE
AP1S2	389.92	-0.280412	0.0998226	-2.8091	0.00496801	0.050627	TRUE
AP1S3	43.8283	-0.0816422	0.108872	-0.749894	0.453318	0.736852	TRUE
AP2A1	1321.2	0.0478927	0.0584902	0.818816	0.412891	0.706968	FALSE
AP2A2	1493.37	-0.0701072	0.0603826	-1.16105	0.245622	0.550199	TRUE
AP2B1	358.737	0.0838719	0.0906164	0.925571	0.354669	0.657342	TRUE
AP2M1	3661.34	0.036508	0.0513871	0.710451	0.477425	0.752907	TRUE
AP2S1	666.843	0.0854942	0.064533	1.32481	0.185233	0.476636	TRUE
AP3B1	1303.58	0.03817	0.0615648	0.619997	0.53526	0.790062	TRUE
AP3B2	0.444702	0.0241381	0.05359	0.450421	0.652407	NA	TRUE
AP3D1	2286.59	0.0135148	0.0765403	0.17657	0.859846	0.950265	TRUE
AP3M1	857.999	0.0400508	0.0734454	0.545314	0.585537	0.818604	FALSE
AP3M2	86.2041	-0.527388	0.13262	-3.97667	6.98867e-05	0.00241824	TRUE
AP3S1	121.452	-0.187988	0.148132	-1.26906	0.204419	0.500755	TRUE
AP3S2	616.225	0.0434278	0.0699524	0.620819	0.534719	0.789965	TRUE
AP4B1	542.591	-0.00563633	0.077505	-0.0727221	0.942027	0.983197	TRUE
AP4E1	151.888	0.00976355	0.115847	0.0842798	0.932834	0.981401	TRUE
AP4M1	106.027	0.140045	0.12853	1.08959	0.275895	0.58187	TRUE
AP4S1	515.024	0.0522197	0.0774804	0.673973	0.500329	0.767589	TRUE
AP5B1	219.693	-0.0987282	0.14705	-0.671392	0.501971	0.768143	TRUE
AP5M1	391.922	-0.232899	0.0801225	-2.90678	0.00365166	0.040598	TRUE
AP5S1	174.306	-0.0312542	0.125382	-0.249271	0.803151	0.926569	TRUE
AP5Z1	160.598	0.212425	0.105321	2.01693	0.0437029	0.211682	TRUE
APAF1	195.617	0.00565952	0.106418	0.0531822	0.957587	0.987746	TRUE
APBA1	70.4722	-0.274314	0.158058	-1.73553	0.0826462	0.307647	TRUE
APBA2	2.76862	0.0312913	0.118467	0.264136	0.791675	0.919947	TRUE
APBA3	818.787	0.0300999	0.0598089	0.503267	0.614777	0.833964	TRUE
APBB1	1117.61	-0.115238	0.0792358	-1.45436	0.145846	0.421835	TRUE
APBB1IP	103.078	-0.291788	0.166706	-1.75032	0.0800639	0.302608	TRUE
APBB2	1391.7	-0.0311716	0.0491535	-0.634169	0.525971	0.78341	TRUE
APBB3	155.077	0.34208	0.117122	2.92072	0.00349226	0.0393947	TRUE
APC	1134.51	0.0902834	0.0611047	1.47752	0.139537	0.413157	TRUE
APC2	166.62	0.0225212	0.12948	0.173936	0.861916	0.951246	TRUE
APCDD1	62.9532	-0.222623	0.141855	-1.56938	0.11656	0.374572	TRUE
APCDD1L	4.65468	0.190641	0.140362	1.35821	0.174397	0.463713	FALSE
APCS	2.49159	-0.184332	0.0794117	-2.32122	0.0202752	0.130627	TRUE
APEH	703.333	-0.0180343	0.0634175	-0.284375	0.776123	0.914627	TRUE
APEX1	401.634	0.119596	0.0726062	1.64719	0.0995199	0.342514	TRUE
APEX2	68.7025	-0.141988	0.144957	-0.979516	0.327325	0.632866	TRUE
APEX2L1	0.120778	0.00618284	0.036177	0.170906	0.864298	NA	FALSE
APH1A	1285.57	0.14567	0.0546697	2.66454	0.00770934	0.0691146	TRUE
APH1B	11.4675	-0.0958171	0.170609	-0.561619	0.574375	0.812516	FALSE
API5	1713.34	-0.15763	0.0675048	-2.33509	0.0195386	0.127589	TRUE
APIP	268.073	0.0448144	0.0992472	0.451543	0.651598	0.852483	TRUE
APITD1	33.4334	-0.225376	0.171348	-1.31531	0.188404	0.4801	TRUE
APLF	58.9793	0.164001	0.170527	0.961732	0.336184	0.640003	TRUE
APLN	528.75	0.423226	0.127345	3.32344	0.00088913	0.0149954	TRUE
APLNR	1164.08	0.107756	0.152371	0.707195	0.479445	0.75424	TRUE
APLP1	83.6353	0.0620069	0.128537	0.482405	0.629518	0.842115	TRUE
APLP2	5718.86	0.0586898	0.059312	0.989509	0.322414	0.627231	TRUE
APMAP	401.706	-0.0727679	0.0975916	-0.745637	0.455887	0.739154	TRUE
APOA1	18.741	-0.519205	0.127199	-4.08183	4.46833e-05	0.0016905	TRUE
APOA1BP	576.194	0.0363397	0.0912714	0.39815	0.69052	0.873818	TRUE
APOA2	7.54102	-0.0893576	0.0565657	-1.57971	0.114172	0.369955	TRUE
APOA4	11.2607	-0.144361	0.0713684	-2.02275	0.0430984	0.209678	TRUE
APOA5	8.93196	-0.443737	0.116227	-3.81784	0.000134625	0.00391863	TRUE
APOB	79.2387	-0.464063	0.116269	-3.99129	6.5715e-05	0.00229451	TRUE
APOBEC1	21.6693	-0.229275	0.171164	-1.33951	0.180405	0.470491	TRUE
APOBEC2	3546.75	-0.126103	0.0712946	-1.76876	0.0769331	0.296384	TRUE
APOBEC3B	14.816	0.175997	0.170622	1.03151	0.302303	0.607526	FALSE
APOBEC4	1.22653	0.102708	0.0866866	1.18483	0.236086	NA	TRUE
APOBR	146.693	-0.387262	0.144789	-2.67466	0.00748058	0.0678363	TRUE
APOC1	5.47138	-0.308595	0.101193	-3.04956	0.00229176	0.0296044	TRUE
APOC2	3.8191	-0.22929	0.0874221	-2.6228	0.00872117	0.0745283	TRUE
APOC3	21.632	-0.112971	0.0637901	-1.77098	0.0765641	0.295508	TRUE
APOC4	2.23754	-0.186978	0.079983	-2.33773	0.0194014	0.126909	FALSE
APOD	4.76506	-0.0894882	0.13077	-0.684318	0.493774	0.764057	TRUE
APOE	1869.78	-0.511725	0.111217	-4.60115	4.20158e-06	0.00025673	TRUE
APOF	0.898621	-0.0947743	0.0583798	-1.62341	0.104502	NA	FALSE
APOH	30.6046	-0.0685386	0.0498314	-1.37541	0.169004	0.455829	TRUE
APOL11A	1273.14	0.0557121	0.138474	0.402328	0.687443	0.871907	FALSE
APOL2	0	NA	NA	NA	NA	NA	TRUE
APOL3	602.534	0.0608469	0.0918512	0.662451	0.507682	0.772307	FALSE
APOL9A	1428.03	0.228408	0.117166	1.94944	0.0512425	0.233028	FALSE
APOLD1	595.194	0.425301	0.174578	2.43617	0.0148438	0.106557	TRUE
APOM	6.55671	-0.30107	0.140863	-2.13733	0.032571	0.177524	TRUE
APON	1.57895	-0.144632	0.0711563	-2.0326	0.0420931	NA	FALSE
APOO	1681.27	0.0257478	0.0693278	0.371392	0.710345	0.883758	TRUE
APOOL	912.919	-0.00129112	0.0738638	-0.0174798	0.986054	0.996231	TRUE
APOPT1	589.217	0.0699832	0.0722411	0.968745	0.332672	0.63721	TRUE
APP	8330.58	-0.107974	0.0818746	-1.31877	0.187244	0.478945	TRUE
APPBP2	659.334	-0.100148	0.0708261	-1.414	0.157361	0.439402	TRUE
APPL1	714.543	-0.00517221	0.0679679	-0.0760978	0.939341	0.9827	TRUE
APPL2	692.925	0.109547	0.0719038	1.52352	0.12763	0.393663	TRUE
APRT	1427.32	0.0137686	0.0559447	0.246111	0.805597	0.927258	TRUE
APTX	70.4057	0.111622	0.141512	0.788777	0.430243	0.721663	TRUE
AQP1	10984.7	-0.0486922	0.103559	-0.47019	0.638219	0.846617	TRUE
AQP11	6.66856	-0.270043	0.160254	-1.68509	0.0919714	0.326759	TRUE
AQP12A	0.111704	0.00618284	0.036177	0.170906	0.864298	NA	TRUE
AQP2	0.116161	-0.00782843	0.036177	-0.216393	0.828682	NA	TRUE
AQP3	0.216386	-0.0016012	0.036177	-0.0442602	0.964697	NA	TRUE
AQP4	1.63956	0.126018	0.0986015	1.27806	0.20123	NA	TRUE
AQP5	0.900637	-0.0579964	0.0609515	-0.951517	0.341342	NA	TRUE
AQP6	8.04706	0.171913	0.141961	1.21099	0.225901	0.52676	TRUE
AQP7	1673.21	0.276203	0.149229	1.85086	0.0641892	0.267059	TRUE
AQP8	1.44367	-0.122464	0.0658277	-1.86038	0.0628322	NA	TRUE
AQP9	2.25604	-0.264499	0.103449	-2.55682	0.0105635	0.0847609	TRUE
AQPEP	20.5671	0.137589	0.174955	0.786424	0.431619	0.722491	TRUE
AQR	451.677	0.0726572	0.0786601	0.923686	0.35565	0.658401	TRUE
AR	58.6116	-0.0667658	0.162602	-0.410608	0.68136	0.868347	TRUE
ARAF	1335.04	0.117549	0.0501954	2.34183	0.0191892	0.125949	TRUE
ARAP1	923.69	0.00867318	0.0839806	0.103276	0.917744	0.975089	TRUE
ARAP2	230.874	-0.0383778	0.124668	-0.30784	0.758204	0.906079	TRUE
ARAP3	1139.68	0.376435	0.0797495	4.72022	2.35589e-06	0.000161227	TRUE
ARC	94.0329	0.516657	0.174916	2.95375	0.00313939	0.0365384	FALSE
ARCN1	2498.28	-0.111394	0.0414933	-2.68463	0.00726093	0.0665895	TRUE
AREG	1.11996	0.0182356	0.08616	0.211648	0.832382	NA	TRUE
AREL1	1234.34	-0.164026	0.0724277	-2.26468	0.0235322	0.143334	TRUE
ARF1	6495.22	-0.0419689	0.0445789	-0.941452	0.346473	0.649686	TRUE
ARF2	539.911	-0.127171	0.0912708	-1.39334	0.163516	0.448729	FALSE
ARF3	1013.13	-0.17397	0.0777911	-2.23637	0.0253273	0.150054	TRUE
ARF4	1499.34	-0.113692	0.0547334	-2.07719	0.0377841	0.194192	TRUE
ARF5	1859.18	0.119074	0.0557978	2.13403	0.0328403	0.178369	TRUE
ARF6	651.27	0.0272711	0.0673616	0.404846	0.68559	0.870684	TRUE
ARFGAP1	754.418	0.089344	0.05837	1.53065	0.125856	0.39058	TRUE
ARFGAP2	1761.15	0.0432954	0.0508425	0.851558	0.394459	0.691472	TRUE
ARFGAP3	336.397	-0.265287	0.0997128	-2.66051	0.0078022	0.0695627	TRUE
ARFGEF1	1990.49	-0.176738	0.0961952	-1.83728	0.0661682	0.271117	TRUE
ARFGEF2	1123.61	-0.00287852	0.0660537	-0.0435784	0.96524	0.988992	TRUE
ARFIP1	433.652	-0.147932	0.089623	-1.6506	0.0988197	0.341095	TRUE
ARFIP2	362.986	0.386791	0.103294	3.74455	0.000180717	0.00482268	TRUE
ARFRP1	847.099	-0.0123923	0.0716998	-0.172835	0.862781	0.951728	TRUE
ARG1	20.0331	-0.321636	0.163856	-1.96292	0.0496558	0.227357	TRUE
ARG2	31.3206	-0.0553092	0.167361	-0.330478	0.741039	0.898479	TRUE
ARGLU1	829.486	0.158494	0.0633744	2.50091	0.0123875	0.0948531	TRUE
ARHGAP1	1599.84	-0.296051	0.0957334	-3.09245	0.00198511	0.0267527	TRUE
ARHGAP10	753.966	-0.0777217	0.0920412	-0.844423	0.398433	0.694956	TRUE
ARHGAP11A	81.5131	-0.218558	0.158662	-1.3775	0.168357	0.454801	TRUE
ARHGAP12	352.291	-0.0680887	0.0991527	-0.686705	0.492268	0.762647	TRUE
ARHGAP15	13.1864	-0.0887599	0.172209	-0.51542	0.606259	0.829302	TRUE
ARHGAP17	412.612	0.174433	0.0744211	2.34386	0.0190852	0.12548	TRUE
ARHGAP18	715.49	0.141434	0.0936517	1.51022	0.130988	0.399636	TRUE
ARHGAP19	96.1328	-0.310152	0.128925	-2.40568	0.0161422	0.112572	TRUE
ARHGAP20	171.593	0.0302061	0.143547	0.210427	0.833335	0.939042	TRUE
ARHGAP21	6975.35	0.0542759	0.0867956	0.62533	0.531755	0.787986	TRUE
ARHGAP22	31.6787	-0.0595668	0.165189	-0.360599	0.718399	0.888151	TRUE
ARHGAP23	759.699	0.159875	0.0723246	2.21052	0.027069	0.157351	TRUE
ARHGAP24	448.494	0.12588	0.145184	0.867039	0.38592	0.683978	TRUE
ARHGAP25	115.229	0.225219	0.137349	1.63976	0.101055	0.345634	TRUE
ARHGAP26	1143.5	-0.383942	0.0957542	-4.00966	6.0806e-05	0.00214746	TRUE
ARHGAP27	346.651	-0.0366433	0.119683	-0.30617	0.759475	0.906656	TRUE
ARHGAP28	94.1069	0.0991782	0.143221	0.692484	0.488634	0.760613	TRUE
ARHGAP29	1310.69	0.118778	0.0581434	2.04284	0.0410682	0.204188	TRUE
ARHGAP30	70.4717	-0.472663	0.169907	-2.7819	0.00540419	0.0536516	TRUE
ARHGAP31	818.213	0.120164	0.0662553	1.81366	0.0697305	0.279946	TRUE
ARHGAP32	296.625	0.0278068	0.0875404	0.317646	0.750754	0.903119	TRUE
ARHGAP33	26.786	0.419204	0.174713	2.39939	0.0164226	0.113397	TRUE
ARHGAP35	2717.9	-0.224655	0.0628347	-3.57533	0.000349783	0.00763967	TRUE
ARHGAP36	0	NA	NA	NA	NA	NA	TRUE
ARHGAP39	104.568	0.0932463	0.136389	0.683681	0.494177	0.764101	TRUE
ARHGAP4	49.8525	-0.189612	0.157726	-1.20216	0.229302	0.530091	TRUE
ARHGAP40	0	NA	NA	NA	NA	NA	FALSE
ARHGAP42	161.497	-0.166912	0.126015	-1.32454	0.185324	0.476636	TRUE
ARHGAP44	906.413	-0.065276	0.0964407	-0.676851	0.4985	0.767081	TRUE
ARHGAP5	1577.25	-0.188982	0.0577326	-3.2734	0.00106264	0.0169911	TRUE
ARHGAP6	95.9496	-0.201416	0.137376	-1.46617	0.142603	0.417118	TRUE
ARHGAP8	50.4871	-0.194376	0.174729	-1.11245	0.265946	0.571613	TRUE
ARHGAP9	76.4724	-0.229772	0.15204	-1.51126	0.130723	0.399355	TRUE
ARHGDIA	3060.65	0.022653	0.0531987	0.425818	0.670241	0.862277	TRUE
ARHGDIB	498.749	-0.160027	0.107839	-1.48394	0.137826	0.410164	FALSE
ARHGDIG	7.0065	-0.090716	0.149282	-0.607683	0.543398	0.794741	TRUE
ARHGEF1	1264.7	0.213267	0.0874482	2.43878	0.0147368	0.106085	TRUE
ARHGEF10	662.643	-0.0311156	0.0618378	-0.50318	0.614837	0.833974	TRUE
ARHGEF10L	1363.1	0.102994	0.0798813	1.28934	0.197279	0.492253	TRUE
ARHGEF11	846.329	0.0949315	0.0653108	1.45353	0.146076	0.421947	TRUE
ARHGEF12	1506.61	0.038369	0.0675609	0.567917	0.570091	0.810154	TRUE
ARHGEF15	1203.57	0.286457	0.0857897	3.33906	0.000840611	0.0144371	TRUE
ARHGEF16	12.7986	0.232545	0.169395	1.3728	0.169815	0.456802	TRUE
ARHGEF17	1683.82	0.221146	0.109316	2.023	0.0430735	0.209678	TRUE
ARHGEF18	396.707	-0.096752	0.0866907	-1.11606	0.264397	0.569568	TRUE
ARHGEF19	6.08209	-0.158137	0.146305	-1.08087	0.279754	0.585195	TRUE
ARHGEF2	647.827	0.0670819	0.0704736	0.951873	0.341161	0.643681	TRUE
ARHGEF25	167.188	-0.283514	0.150659	-1.88183	0.0598595	0.255323	TRUE
ARHGEF26	40.4553	0.133341	0.170549	0.781833	0.434313	0.72478	TRUE
ARHGEF28	99.0709	-0.417165	0.134556	-3.10031	0.00193318	0.0262936	TRUE
ARHGEF3	516.453	0.127018	0.105145	1.20803	0.227035	0.527581	TRUE
ARHGEF33	25.9709	0.0645963	0.173315	0.372711	0.709364	0.883282	TRUE
ARHGEF37	581.064	0.104713	0.0976521	1.0723	0.283583	0.588413	TRUE
ARHGEF38	0	NA	NA	NA	NA	NA	TRUE
ARHGEF39	5.29488	0.133979	0.140603	0.952888	0.340647	0.643514	TRUE
ARHGEF4	380.376	-0.0327844	0.0862165	-0.380257	0.703755	0.880293	TRUE
ARHGEF40	641.813	0.0967462	0.10022	0.965339	0.334375	0.638639	TRUE
ARHGEF5	173.026	0.131254	0.15648	0.838792	0.401586	0.697139	TRUE
ARHGEF6	593.742	-0.256313	0.124597	-2.05714	0.0396724	0.200748	TRUE
ARHGEF7	1381.25	0.00894758	0.0668585	0.133829	0.893538	0.964305	TRUE
ARHGEF9	253.435	-0.324055	0.111343	-2.91042	0.00360941	0.0402928	TRUE
ARID1A	1753.12	0.0896236	0.0481456	1.86151	0.062672	0.263131	TRUE
ARID1B	758.339	-0.0302821	0.0660324	-0.458594	0.646526	0.850311	TRUE
ARID2	762.153	-0.108217	0.0854418	-1.26655	0.205315	0.501339	TRUE
ARID3A	23.6154	0.0876329	0.172365	0.508414	0.611163	0.832363	TRUE
ARID3B	148.168	0.0863619	0.122662	0.704065	0.481392	0.755764	TRUE
ARID3C	0	NA	NA	NA	NA	NA	TRUE
ARID4A	390.782	-0.0927193	0.0827821	-1.12004	0.262697	0.568119	TRUE
ARID4B	1.77423	-0.105181	0.105315	-0.998727	0.317927	0.623305	TRUE
ARID5A	383.238	0.123582	0.112426	1.09923	0.271669	0.578061	TRUE
ARID5B	269.787	-0.279413	0.108131	-2.58402	0.00976567	0.0801205	TRUE
ARIH1	2172.28	-0.0944505	0.054209	-1.74234	0.081449	0.305354	TRUE
ARIH2	1776.21	-0.0465714	0.0639725	-0.727991	0.466619	0.746028	TRUE
ARL1	770.268	-0.149215	0.062653	-2.3816	0.0172374	0.117391	TRUE
ARL10	142.782	-0.0583457	0.108613	-0.537188	0.591138	0.820992	TRUE
ARL11	29.7151	-0.166715	0.175038	-0.95245	0.340869	0.643538	TRUE
ARL13A	0.966005	0.0749366	0.0668002	1.1218	0.261946	NA	FALSE
ARL13B	222.623	0.221235	0.0999951	2.21246	0.0269348	0.156788	TRUE
ARL14	2.25429	-0.244356	0.0993653	-2.45917	0.0139261	0.102415	TRUE
ARL14EP	589.976	0.0336024	0.0742197	0.452742	0.650735	0.852183	TRUE
ARL14EPL	0	NA	NA	NA	NA	NA	TRUE
ARL15	310.854	0.075054	0.0928168	0.808625	0.418731	0.711649	TRUE
ARL16	317.152	0.0450332	0.096571	0.466322	0.640985	0.847928	TRUE
ARL2	307.349	0.0553062	0.0960784	0.575637	0.564861	0.807289	TRUE
ARL2BP	2582.42	-0.0226105	0.0568406	-0.397789	0.690786	0.874026	TRUE
ARL3	560.878	0.170253	0.0763776	2.2291	0.0258072	0.151904	TRUE
ARL4A	292.178	0.350757	0.13167	2.66391	0.00772373	0.0691454	TRUE
ARL4C	179.976	0.0463695	0.148117	0.313061	0.754235	0.904213	TRUE
ARL4D	90.8162	0.345388	0.158327	2.18148	0.0291476	0.165111	TRUE
ARL5A	356.929	-0.312098	0.0782519	-3.98837	6.65291e-05	0.00231418	TRUE
ARL5B	450.398	-0.0306422	0.104958	-0.291947	0.770327	0.911792	TRUE
ARL5C	7.11827	-0.289168	0.15127	-1.9116	0.0559272	0.245551	FALSE
ARL6	130.352	-0.170965	0.122944	-1.3906	0.164347	0.449329	TRUE
ARL6IP1	609.317	0.0347805	0.0736776	0.472063	0.636882	0.845826	TRUE
ARL6IP4	586.508	0.0925239	0.0699414	1.32288	0.185876	0.477418	FALSE
ARL6IP5	1155.58	-0.0642368	0.0671944	-0.955984	0.33908	0.641875	TRUE
ARL6IP6	279.18	-0.0129921	0.0824726	-0.157533	0.874825	0.956172	TRUE
ARL8A	525.601	-0.110284	0.128163	-0.8605	0.389513	0.687734	TRUE
ARL8B	4284.89	-0.175851	0.0472916	-3.71843	0.000200466	0.0051966	TRUE
ARL9	0.228471	-0.0156125	0.036177	-0.431558	0.666062	NA	FALSE
ARMC1	765.998	0.00225138	0.0708909	0.0317584	0.974665	0.9927	TRUE
ARMC10	352.863	0.15379	0.0822141	1.8706	0.0613999	0.259521	TRUE
ARMC12	0	NA	NA	NA	NA	NA	TRUE
ARMC2	347.877	-0.0879653	0.125067	-0.703347	0.481839	0.756306	TRUE
ARMC3	2.33993	-0.0228081	0.109278	-0.208717	0.834669	0.939336	TRUE
ARMC4	1.87458	-0.0180975	0.110458	-0.163841	0.869856	0.9544	TRUE
ARMC5	308.265	0.0935779	0.0945436	0.989786	0.322279	0.627049	TRUE
ARMC6	80.6701	-0.0885198	0.142154	-0.622704	0.533479	0.789	TRUE
ARMC7	61.85	0.0456387	0.144908	0.314949	0.7528	0.903734	TRUE
ARMC8	920.904	0.12225	0.0726945	1.68169	0.0926291	0.327961	TRUE
ARMC9	114.688	-0.0467929	0.132547	-0.353029	0.724067	0.890789	TRUE
ARMCX1	0.116161	-0.00782843	0.036177	-0.216393	0.828682	NA	TRUE
ARMCX2	81.8354	-0.219843	0.151519	-1.45092	0.146801	0.422828	TRUE
ARMCX3	1233.92	-0.301529	0.131801	-2.28777	0.0221512	0.138061	TRUE
ARMCX4	355.452	0.365375	0.0848523	4.30601	1.66225e-05	0.000770942	TRUE
ARMCX6	57.3895	0.409808	0.161593	2.53605	0.0112111	0.0884909	TRUE
ARNT	527.615	-0.0137134	0.0855181	-0.160356	0.872601	0.955042	TRUE
ARNT2	12.8369	-0.240448	0.174297	-1.37953	0.167731	0.454305	TRUE
ARNTL	665.286	-0.502668	0.130551	-3.85035	0.000117948	0.00358924	TRUE
ARNTL2	1.65178	-0.0133342	0.100532	-0.132636	0.894481	NA	FALSE
ARPC1A	1615.77	-0.016815	0.0676847	-0.248431	0.803801	0.926694	TRUE
ARPC1B	1206.2	-0.155642	0.128474	-1.21147	0.225716	0.526712	TRUE
ARPC2	2909.73	-0.114835	0.0624762	-1.83806	0.066053	0.270789	TRUE
ARPC3	579.587	-0.00237239	0.0990026	-0.0239629	0.980882	0.994576	TRUE
ARPC4	1625.97	-0.0710852	0.0625102	-1.13718	0.255464	0.559947	TRUE
ARPC5	855.211	-0.0742052	0.0892883	-0.831074	0.405932	0.701258	TRUE
ARPC5L	1636.65	0.0135291	0.0684957	0.197518	0.843422	0.942796	TRUE
ARPP19	2305.81	-0.117022	0.0550267	-2.12665	0.0334494	0.180508	TRUE
ARPP21	5.43089	0.150342	0.145335	1.03445	0.300924	0.606257	TRUE
ARR3	2.6453	0.235218	0.121537	1.93536	0.0529467	0.237953	FALSE
ARRB1	1139.69	-0.296766	0.104081	-2.8513	0.00435406	0.0458576	TRUE
ARRB2	124.396	-0.139582	0.145062	-0.962223	0.335938	0.63986	TRUE
ARRDC1	110.008	0.262663	0.130206	2.01728	0.0436659	0.211598	TRUE
ARRDC2	95.0374	0.303331	0.160531	1.88954	0.0588189	0.252564	TRUE
ARRDC3	764.021	-0.129059	0.114473	-1.12743	0.259563	0.564193	TRUE
ARRDC4	465.893	0.296006	0.120706	2.45229	0.0141951	0.103441	TRUE
ARRDC5	0.873789	0.0151621	0.0684688	0.221445	0.824746	NA	FALSE
ARSA	394.341	0.152549	0.0744158	2.04996	0.0403682	0.203001	TRUE
ARSB	282.778	0.0205856	0.0999805	0.205896	0.836872	0.939577	TRUE
ARSE	233.937	0.255767	0.122398	2.08962	0.0366516	0.190921	TRUE
ARSG	156.794	0.102897	0.11619	0.885593	0.375837	0.675121	TRUE
ARSI	12.6567	-0.304503	0.162183	-1.87752	0.060447	0.256751	FALSE
ARSJ	8.01424	-0.0530297	0.160068	-0.331296	0.740421	0.89824	TRUE
ARSK	207.198	0.101447	0.122943	0.825158	0.409282	0.704542	TRUE
ART1	324.444	-0.916193	0.169553	-5.40357	6.53285e-08	7.7379e-06	TRUE
ART2B	2.43754	-0.0976693	0.111795	-0.873647	0.38231	0.681007	FALSE
ART3	3560.4	0.200595	0.129434	1.54979	0.121193	0.382087	TRUE
ART4	212.722	-0.0309933	0.159427	-0.194404	0.845859	0.943764	TRUE
ART5	161.012	-0.386879	0.157356	-2.45861	0.0139475	0.102415	TRUE
ARTN	3.50864	0.136997	0.133735	1.02439	0.305651	0.611204	TRUE
ARV1	112.215	0.118084	0.126909	0.930466	0.35213	0.65421	TRUE
ARVCF	545.735	-0.0569002	0.108621	-0.52384	0.60039	0.827031	TRUE
ARX	0	NA	NA	NA	NA	NA	TRUE
ARXES2	0.893066	0.0839873	0.0720644	1.16545	0.243838	NA	FALSE
AS3MT	399.398	-0.100414	0.0964118	-1.04152	0.297636	0.60263	TRUE
ASAH1	2087.44	0.0210878	0.0489416	0.430877	0.666558	0.860049	TRUE
ASAH2	369.98	-0.583164	0.109563	-5.32261	1.02288e-07	1.14133e-05	TRUE
ASAP1	240.715	0.041074	0.100531	0.408571	0.682854	0.869334	TRUE
ASAP2	1833.32	0.492155	0.130778	3.76328	0.000167701	0.0046277	TRUE
ASB1	586.238	-0.152765	0.0872425	-1.75104	0.0799387	0.302608	TRUE
ASB10	719.975	0.174513	0.10386	1.68027	0.0929055	0.328788	TRUE
ASB11	1085.21	-0.251716	0.0968056	-2.60022	0.00931643	0.0776651	TRUE
ASB12	301.281	-0.0764002	0.129991	-0.587734	0.556711	0.802568	TRUE
ASB13	161.633	0.0266244	0.124145	0.214462	0.830187	0.937735	TRUE
ASB14	1094.89	0.140218	0.0927993	1.51098	0.130794	0.399355	TRUE
ASB15	607.883	-0.110921	0.134966	-0.821841	0.411168	0.705595	TRUE
ASB16	20.1863	-0.0785391	0.175076	-0.4486	0.65372	0.853609	FALSE
ASB17	0	NA	NA	NA	NA	NA	FALSE
ASB18	490.71	-0.217189	0.132888	-1.63437	0.102181	0.346964	FALSE
ASB2	5118.5	0.0216012	0.0855863	0.25239	0.800739	0.924896	TRUE
ASB3	199.354	-0.0668059	0.11901	-0.561346	0.574561	0.812536	TRUE
ASB4	103.92	-0.183921	0.168988	-1.08836	0.276435	0.582399	FALSE
ASB5	109.916	0.434218	0.148287	2.92822	0.00340907	0.0387401	FALSE
ASB6	209.135	0.128713	0.0961297	1.33895	0.180588	0.470505	TRUE
ASB7	61.6026	-0.136854	0.155814	-0.878316	0.379772	0.678942	TRUE
ASB8	1508.58	-0.00922306	0.0653415	-0.141152	0.88775	0.962246	TRUE
ASB9	9.70304	0.0880735	0.167462	0.52593	0.598937	0.825864	FALSE
ASCC1	343.576	-0.00364702	0.0880216	-0.0414332	0.966951	0.989732	TRUE
ASCC2	400.216	0.0279332	0.0827806	0.337437	0.735787	0.896451	TRUE
ASCC3	552.208	-0.124051	0.0689217	-1.79988	0.071879	0.284011	TRUE
ASCL1	0	NA	NA	NA	NA	NA	TRUE
ASCL2	2.44826	0.137935	0.120073	1.14876	0.250655	0.555821	TRUE
ASCL3	5.00539	-0.443587	0.131744	-3.36703	0.000759815	0.0134868	TRUE
ASCL4	1.4365	-0.00953527	0.101007	-0.0944019	0.92479	NA	FALSE
ASCL5	0	NA	NA	NA	NA	NA	FALSE
ASF1A	442.83	-0.0972875	0.0905638	-1.07424	0.282714	0.587617	TRUE
ASF1B	19.5089	-0.0660055	0.17483	-0.377542	0.705771	0.881241	TRUE
ASGR1	3.12337	-0.222487	0.0863587	-2.57632	0.00998594	0.081355	TRUE
ASGR2	46.3454	-0.385464	0.170134	-2.26565	0.023473	0.143144	TRUE
ASH1L	2172.97	-0.0408454	0.0725142	-0.563274	0.573248	0.81204	TRUE
ASH2L	787.963	0.0638902	0.0637736	1.00183	0.316427	0.621869	TRUE
ASIC1	68.0373	0.208809	0.151962	1.37408	0.169417	0.456302	TRUE
ASIC2	2.28263	-0.0170988	0.100762	-0.169696	0.865249	0.952381	TRUE
ASIC3	0.21591	-0.0156125	0.036177	-0.431558	0.666062	NA	TRUE
ASIC4	2.40243	-0.1268	0.110915	-1.14322	0.252947	0.557527	TRUE
ASIC5	0.106538	0.00618284	0.036177	0.170906	0.864298	NA	TRUE
ASIP	0	NA	NA	NA	NA	NA	FALSE
ASL	194.188	-0.111027	0.0944149	-1.17594	0.239617	0.544004	TRUE
ASMT	6.21731	0.1522	0.150967	1.00816	0.313375	0.619106	FALSE
ASMTL	325.294	0.0967062	0.107001	0.903787	0.366108	0.667062	TRUE
ASNA1	1340.3	-0.493926	0.0947869	-5.2109	1.87922e-07	1.84307e-05	TRUE
ASNS	25.1053	-0.33693	0.174704	-1.92857	0.0537839	0.240396	TRUE
ASNSD1	959.647	0.161988	0.0703016	2.30419	0.0212121	0.134358	TRUE
ASPA	10.9359	0.0177286	0.171112	0.103608	0.91748	0.974973	TRUE
ASPDH	18.3387	-0.24692	0.174908	-1.41172	0.158034	0.440435	TRUE
ASPG	1.22477	-0.118937	0.0710563	-1.67384	0.0941618	NA	TRUE
ASPH	804.695	-0.120774	0.0776798	-1.55477	0.12	0.380521	TRUE
ASPHD1	0.56757	0.00737565	0.0558509	0.13206	0.894937	NA	TRUE
ASPHD2	0.120778	0.00618284	0.036177	0.170906	0.864298	NA	TRUE
ASPM	31.2334	0.303357	0.174205	1.74137	0.081618	0.305662	TRUE
ASPN	316.457	-0.29652	0.141363	-2.09757	0.0359427	0.188503	TRUE
ASPSCR1	476.381	0.24308	0.0722845	3.36282	0.000771512	0.0135944	TRUE
ASRGL1	250.22	0.159542	0.0925866	1.72317	0.0848582	0.312474	TRUE
ASS1	126.265	-0.51342	0.174842	-2.93648	0.00331957	0.0380318	TRUE
ASTE1	39.1674	0.181508	0.162835	1.11467	0.26499	0.570275	TRUE
ASTL	0.108688	-0.00782843	0.036177	-0.216393	0.828682	NA	TRUE
ASTN1	68.1533	0.0218421	0.161299	0.135414	0.892284	0.96388	TRUE
ASTN2	29.1858	-0.304118	0.174764	-1.74016	0.0818304	0.306352	TRUE
ASUN	875.255	0.149959	0.0658848	2.27608	0.0228415	0.140741	TRUE
ASXL1	766.482	0.122488	0.0607918	2.01487	0.0439183	0.212132	TRUE
ASXL2	508.793	-0.0448537	0.0849237	-0.528165	0.597385	0.824833	TRUE
ASZ1	0	NA	NA	NA	NA	NA	TRUE
ATAD1	2326.1	-0.176585	0.0562823	-3.13749	0.00170402	0.024006	TRUE
ATAD2	136.941	-0.165822	0.107526	-1.54216	0.123035	0.385373	TRUE
ATAD2B	55.4774	-0.0073518	0.152754	-0.0481284	0.961614	0.988267	TRUE
ATAD3A	572.936	0.0942059	0.0717436	1.31309	0.189152	0.481096	TRUE
ATAD5	64.4119	0.126144	0.140676	0.896699	0.36988	0.670034	TRUE
ATAT1	102.879	0.103116	0.13134	0.785109	0.43239	0.723006	TRUE
ATCAY	11.1746	0.267238	0.167683	1.59371	0.111001	0.364356	TRUE
ATE1	1021.45	-0.19208	0.0676114	-2.84094	0.00449809	0.0468594	TRUE
ATF1	845.441	-0.0386776	0.0616197	-0.627683	0.530212	0.786987	TRUE
ATF2	318.492	-0.106714	0.0880341	-1.21219	0.22544	0.526598	TRUE
ATF3	139.505	-0.268464	0.175008	-1.534	0.125028	0.389084	TRUE
ATF4	2575.46	0.0841005	0.0647885	1.29808	0.194261	0.488045	TRUE
ATF5	1426.39	-0.119759	0.10901	-1.09861	0.271939	0.578285	TRUE
ATF6	1107.95	-0.142453	0.0740861	-1.92281	0.054504	0.242279	TRUE
ATF6B	559.827	0.122489	0.0877802	1.39541	0.162894	0.44758	TRUE
ATF7	892.659	-0.0625967	0.0604624	-1.0353	0.300529	0.605903	TRUE
ATF7IP	1312.85	-0.155108	0.0901313	-1.72092	0.085266	0.313123	TRUE
ATF7IP2	0.116161	-0.00782843	0.036177	-0.216393	0.828682	NA	TRUE
ATG10	435.45	0.0598367	0.0810999	0.737815	0.460627	0.741897	TRUE
ATG12	1172.42	-0.235301	0.0784458	-2.99954	0.00270389	0.0332278	TRUE
ATG13	1335.91	-0.222825	0.089759	-2.48248	0.0130471	0.0978716	TRUE
ATG14	211.726	0.060069	0.10684	0.562235	0.573956	0.812407	TRUE
ATG16L1	781.85	-0.137942	0.0561276	-2.45765	0.013985	0.102543	TRUE
ATG16L2	74.7112	0.266437	0.137302	1.94052	0.052317	0.236101	TRUE
ATG2A	924.696	0.0952108	0.0707655	1.34544	0.178483	0.468191	TRUE
ATG3	592.639	-0.125378	0.0723155	-1.73376	0.08296	0.308113	TRUE
ATG4A	19.0332	0.188687	0.17507	1.07778	0.281132	0.586091	TRUE
ATG4AL1	156.348	-0.091978	0.125765	-0.731347	0.464567	0.744449	FALSE
ATG4B	496.439	0.0142264	0.0751176	0.189389	0.849788	0.945369	TRUE
ATG4C	175.674	-0.2166	0.0988193	-2.19188	0.0283881	0.162743	TRUE
ATG4D	703.477	-0.0531538	0.0737889	-0.720349	0.47131	0.749385	TRUE
ATG5	380.955	-0.0616988	0.0789839	-0.781157	0.43471	0.725047	TRUE
ATG7	188.817	-0.0161856	0.114953	-0.140802	0.888026	0.962268	TRUE
ATG9A	2460.3	0.0275536	0.0543858	0.506633	0.612413	0.832923	TRUE
ATG9B	1.77711	-0.0317609	0.105523	-0.300985	0.763426	0.908301	TRUE
ATHL1	192.392	0.10194	0.102245	0.997025	0.318752	0.623891	TRUE
ATIC	758.281	-0.68426	0.125908	-5.43461	5.49179e-08	6.81956e-06	TRUE
ATL1	34.6054	-0.0481789	0.169982	-0.283435	0.776844	0.914657	TRUE
ATL2	1005.41	-0.0481086	0.0610533	-0.787977	0.43071	0.721785	TRUE
ATL3	389.804	-0.149907	0.103767	-1.44465	0.148556	0.425892	TRUE
ATM	464.172	0.116279	0.0958778	1.21278	0.225214	0.526309	TRUE
ATMIN	384.619	0.155377	0.076957	2.01901	0.043486	0.211043	TRUE
ATN1	0	NA	NA	NA	NA	NA	TRUE
ATOH1	0	NA	NA	NA	NA	NA	TRUE
ATOH7	0.227316	0.0124101	0.036177	0.343038	0.73157	NA	TRUE
ATOH8	143.921	0.284223	0.136547	2.0815	0.0373885	0.193126	TRUE
ATOX1	331.079	0.0101508	0.0778704	0.130355	0.896285	0.96522	TRUE
ATP10A	66.8555	-0.202296	0.149879	-1.34973	0.177102	0.467276	TRUE
ATP10B	0.436485	0.0278048	0.0382315	0.727274	0.467058	NA	TRUE
ATP10D	338.412	0.156228	0.0898352	1.73905	0.0820253	0.306397	TRUE
ATP11A	819.467	0.0135941	0.0821013	0.165578	0.868489	0.953988	TRUE
ATP11B	866.979	-0.0208904	0.0652332	-0.320242	0.748785	0.902593	TRUE
ATP11C	228.361	-0.111552	0.102823	-1.08489	0.277969	0.583876	TRUE
ATP12A	7.35987	-0.0634418	0.146157	-0.434067	0.66424	0.859781	TRUE
ATP13A1	405.53	0.162634	0.0819949	1.98347	0.0473149	0.221363	TRUE
ATP13A2	401.364	0.0615233	0.0748704	0.82173	0.411231	0.705595	TRUE
ATP13A3	51.7597	-0.289177	0.165882	-1.74327	0.0812872	0.305208	TRUE
ATP13A4	0.109164	0.00618284	0.036177	0.170906	0.864298	NA	TRUE
ATP13A5	1.32555	-0.0493715	0.0834934	-0.591323	0.554304	NA	TRUE
ATP1A1	13076.8	-0.0857472	0.0666075	-1.28735	0.197972	0.492933	TRUE
ATP1A2	6605.23	0.142023	0.14491	0.980077	0.327048	0.632779	FALSE
ATP1A3	310.652	-0.0621254	0.095392	-0.651265	0.514876	0.776924	TRUE
ATP1A4	15.0095	-0.0522513	0.137943	-0.37879	0.704844	0.88087	TRUE
ATP1B1	5718.34	0.288617	0.0727578	3.96682	7.28377e-05	0.0024979	TRUE
ATP1B2	618.827	0.063406	0.0879417	0.721001	0.470909	0.749385	TRUE
ATP1B3	1458.98	-0.0512921	0.0834091	-0.614946	0.53859	0.791639	TRUE
ATP1B4	2.24119	-0.000517552	0.1005	-0.00514976	0.995891	0.99854	TRUE
ATP2A1	32.5284	0.478303	0.174804	2.73623	0.00621481	0.0594014	TRUE
ATP2A2	174841	-0.0630341	0.059695	-1.05594	0.290998	0.596406	TRUE
ATP2A3	439.133	-0.094314	0.10522	-0.896353	0.370064	0.670067	TRUE
ATP2B1	877.161	-0.0915301	0.0874723	-1.04639	0.295381	0.600433	TRUE
ATP2B2	213.675	-0.392898	0.149987	-2.61954	0.00880482	0.0750701	TRUE
ATP2B3	1.67378	-0.16046	0.102908	-1.55926	0.118935	NA	TRUE
ATP2B4	281.794	0.143011	0.10407	1.37419	0.169384	0.456302	TRUE
ATP2C1	1217.39	-0.0872797	0.0534262	-1.63365	0.102333	0.347181	TRUE
ATP2C2	5.93509	0.122053	0.135738	0.899184	0.368555	0.668931	TRUE
ATP4A	49.873	-0.388776	0.168923	-2.30149	0.0213637	0.13493	FALSE
ATP4B	0	NA	NA	NA	NA	NA	FALSE
ATP5A1	96956.7	0.00562604	0.0679207	0.0828325	0.933985	0.981739	TRUE
ATP5B	152259	0.0249713	0.0655302	0.381065	0.703155	0.880293	TRUE
ATP5C1	23894.8	0.111113	0.0606411	1.8323	0.0669061	0.273123	TRUE
ATP5D	9147	0.122068	0.0572854	2.13088	0.0330989	0.179331	TRUE
ATP5E	6504.06	0.0322594	0.0709918	0.45441	0.649534	0.851483	TRUE
ATP5F1	21.8118	0.17866	0.172605	1.03508	0.30063	0.605903	TRUE
ATP5G1	7863.83	0.282634	0.0633314	4.46277	8.09072e-06	0.000437126	FALSE
ATP5G2	5744.8	0.0942487	0.0583611	1.61492	0.106327	0.354932	TRUE
ATP5G3	26102.9	0.160719	0.0516938	3.10906	0.00187682	0.0256883	TRUE
ATP5H	11828.5	0.180594	0.0559769	3.22623	0.00125432	0.0191039	FALSE
ATP5HL1	7.41108	0.0807539	0.165751	0.4872	0.626116	0.840592	FALSE
ATP5I	6121.89	0.126377	0.0613172	2.06104	0.0392993	0.199419	TRUE
ATP5J	9512.44	0.15283	0.0584926	2.61282	0.00897999	0.0758893	TRUE
ATP5J2	6114.7	0.159758	0.0586139	2.7256	0.00641853	0.06082	TRUE
ATP5L	14701.8	0.0866203	0.0655185	1.32207	0.186144	0.477714	TRUE
ATP5O	12755.5	0.12144	0.050685	2.39598	0.0165761	0.113895	TRUE
ATP5S	659.078	-0.0226944	0.0793402	-0.286039	0.774848	0.913912	TRUE
ATP5SL	1363.28	-0.0853279	0.116034	-0.735373	0.462112	0.742834	TRUE
ATP6AP1	2831.22	-0.0909623	0.0575453	-1.58071	0.113945	0.369841	TRUE
ATP6AP1L	154.406	-0.0853605	0.175063	-0.4876	0.625833	0.840592	TRUE
ATP6AP2	263.245	-0.249834	0.0875741	-2.85283	0.00433324	0.0457037	TRUE
ATP6V0A1	1913.79	0.0488331	0.0509911	0.957678	0.338225	0.641062	TRUE
ATP6V0A2	581.423	-0.122839	0.128247	-0.957833	0.338147	0.641062	TRUE
ATP6V0A4	2.1393	0.0471599	0.106505	0.442794	0.657915	0.856056	TRUE
ATP6V0B	425.581	0.165355	0.0810236	2.04082	0.0412687	0.204639	TRUE
ATP6V0C	4116.15	0.10845	0.0494783	2.19187	0.0283887	0.162743	TRUE
ATP6V0D1	1183.51	0.00695471	0.0700269	0.0993148	0.920888	0.976472	TRUE
ATP6V0D2	0	NA	NA	NA	NA	NA	TRUE
ATP6V0E1	1098.87	-0.0403189	0.0928764	-0.434113	0.664206	0.859781	TRUE
ATP6V0E2	600.42	0.0100228	0.0839735	0.119357	0.904993	0.969334	TRUE
ATP6V1A	870.795	-0.142978	0.0672307	-2.12667	0.0334471	0.180508	TRUE
ATP6V1B1	0.448184	0.0562669	0.054045	1.04111	0.297824	NA	TRUE
ATP6V1B2	1550.56	-0.0632798	0.0549283	-1.15204	0.249303	0.554392	TRUE
ATP6V1C1	852.063	0.0193649	0.0696994	0.277834	0.78114	0.916069	TRUE
ATP6V1C2	2.77992	-0.0892176	0.106466	-0.837991	0.402036	0.697684	TRUE
ATP6V1D	2194.89	-0.0180173	0.0868763	-0.207391	0.835705	0.939336	TRUE
ATP6V1E1	2633.56	0.0665054	0.0480934	1.38284	0.166714	0.452456	TRUE
ATP6V1E2	1.68859	-0.16113	0.102458	-1.57264	0.115802	NA	FALSE
ATP6V1F	934.357	-0.0802472	0.0675441	-1.18807	0.234806	0.53832	FALSE
ATP6V1G1	2361.33	0.045051	0.0711686	0.633018	0.526722	0.783906	TRUE
ATP6V1G2	29.9272	-0.127051	0.173979	-0.73027	0.465225	0.745068	TRUE
ATP6V1G3	0	NA	NA	NA	NA	NA	TRUE
ATP6V1H	652.507	0.0515445	0.0826701	0.623496	0.532959	0.788805	TRUE
ATP7A	230.954	-0.0614403	0.112555	-0.545867	0.585157	0.818529	TRUE
ATP7B	19.6698	0.080012	0.175011	0.457182	0.64754	0.850608	TRUE
ATP8A1	602.756	0.010066	0.151525	0.0664312	0.947034	0.984236	TRUE
ATP8B1	348.561	0.0304346	0.122006	0.249452	0.803011	0.926478	TRUE
ATP8B2	1519.59	0.00602277	0.0574651	0.104808	0.916529	0.974506	TRUE
ATP8B3	0.437459	-0.0070109	0.0535431	-0.130939	0.895823	NA	TRUE
ATP8B4	36.7771	-0.369513	0.175075	-2.1106	0.0348065	0.184492	TRUE
ATP8B5P	12.8878	0.0827883	0.172788	0.479132	0.631845	0.843487	FALSE
ATP9A	2083.24	-0.0599612	0.108874	-0.550741	0.581811	0.816832	TRUE
ATP9B	406.186	-0.0274268	0.0877561	-0.312535	0.754634	0.904351	TRUE
ATPAF1	1608.04	-0.300409	0.0581958	-5.16204	2.44269e-07	2.32176e-05	TRUE
ATPAF2	657.629	0.13622	0.100723	1.35243	0.176238	0.46643	TRUE
ATPIF1	2202.28	-0.100749	0.0791093	-1.27354	0.202827	0.49962	TRUE
ATR	131.506	0.114238	0.117351	0.973475	0.330317	0.635381	TRUE
ATRAID	298.166	0.264909	0.0930422	2.84719	0.00441065	0.0462073	TRUE
ATRIP	28.7714	0.323256	0.169355	1.90875	0.0562948	0.246236	TRUE
ATRN	2928.98	-0.011712	0.0850324	-0.137736	0.890449	0.963077	TRUE
ATRNL1	580.901	-0.103036	0.107758	-0.956174	0.338985	0.641875	TRUE
ATRX	1924.73	-0.229946	0.0585531	-3.92713	8.59656e-05	0.00279852	TRUE
ATXN1	319.266	-0.139814	0.129943	-1.07597	0.281942	0.587144	TRUE
ATXN10	1824.67	-0.0283666	0.0493458	-0.574854	0.56539	0.80782	TRUE
ATXN1L	880.702	-0.0403889	0.0549392	-0.735156	0.462245	0.742869	TRUE
ATXN2	1362.76	-0.0283814	0.0632744	-0.448544	0.653761	0.853609	TRUE
ATXN2L	1003.06	0.182135	0.0720187	2.529	0.0114388	0.0895445	TRUE
ATXN3	356.048	0.0836538	0.0768396	1.08868	0.276294	0.582313	TRUE
ATXN7	655.575	-0.0543508	0.078611	-0.69139	0.489321	0.760759	TRUE
ATXN7L2	57.6056	0.303778	0.148293	2.04849	0.040512	0.20326	TRUE
ATXN7L3	848.729	0.0203967	0.0694088	0.293863	0.768863	0.910829	TRUE
ATXN7L3B	700.482	0.0386918	0.068229	0.567087	0.570655	0.810475	TRUE
ATXN7L4	129.346	7.39195e-05	0.110835	0.000666931	0.999468	0.999728	FALSE
AUH	1882.58	-0.021982	0.0829065	-0.265142	0.7909	0.919795	TRUE
AUNIP	0.656916	-0.0705293	0.0604913	-1.16594	0.243639	NA	FALSE
AUP1	727.09	0.0923689	0.0636421	1.45138	0.146674	0.422621	TRUE
AURKA	180.046	0.105912	0.127379	0.831468	0.405709	0.701236	TRUE
AURKAIP1	1040.82	0.274565	0.068156	4.02848	5.61384e-05	0.0020244	TRUE
AURKB	23.7907	0.0502423	0.172591	0.291106	0.77097	0.911971	TRUE
AURKC	45.0568	0.0983655	0.153777	0.639663	0.522392	0.781056	FALSE
AVEN	344.481	0.160712	0.0936773	1.71559	0.0862363	0.315408	TRUE
AVGR1	0	NA	NA	NA	NA	NA	FALSE
AVIL	24.4753	-0.265471	0.168879	-1.57196	0.115959	0.3737	TRUE
AVL9	297.807	-0.0501248	0.090072	-0.556497	0.577871	0.814319	TRUE
AVP	3.45691	-0.181016	0.126354	-1.43261	0.15197	0.431502	FALSE
AVPI1	484.041	-0.0783679	0.0768823	-1.01932	0.30805	0.613809	TRUE
AVPR1A	22.4973	-0.386759	0.171952	-2.24923	0.024498	0.147054	TRUE
AVPR1B	0.323133	-0.0233965	0.036177	-0.646724	0.51781	NA	FALSE
AVPR2	1.78024	0.00312326	0.0989659	0.031559	0.974824	0.9927	TRUE
AWAT1	0.430386	0.0411662	0.0463824	0.887539	0.374789	NA	TRUE
AWAT2	0.991634	0.0348029	0.0774088	0.449599	0.653	NA	TRUE
AXIN1	480.283	0.0534316	0.0812054	0.657981	0.510551	0.773977	TRUE
AXIN2	35.1402	0.012322	0.164824	0.0747587	0.940407	0.9827	TRUE
AXL	709.021	-0.229611	0.106285	-2.16034	0.0307464	0.171471	TRUE
AZGP1	12.3503	-0.376459	0.110006	-3.42217	0.000621233	0.0115668	TRUE
AZI1	754.392	0.0574181	0.0987339	0.581544	0.560874	0.804652	TRUE
AZI2	606.007	-0.0571366	0.0665979	-0.857934	0.390929	0.689048	TRUE
AZIN1	3102.7	-0.0934925	0.0656189	-1.42478	0.154221	0.434845	TRUE
B2M	15851.1	-0.297699	0.0933193	-3.19011	0.0014222	0.0210567	TRUE
B3GALNT1	255.071	0.295609	0.11622	2.54352	0.0109742	0.0871034	TRUE
B3GALNT2	1414.1	-0.206274	0.0895135	-2.3044	0.0212005	0.134339	TRUE
B3GALT1	7.78607	0.032704	0.157484	0.207666	0.83549	0.939336	TRUE
B3GALT2	403.352	0.121289	0.141404	0.857747	0.391032	0.689079	TRUE
B3GALT4	25.733	0.0896093	0.173204	0.517362	0.604904	0.828632	FALSE
B3GALT5	19.8623	-0.542592	0.165571	-3.27709	0.00104881	0.0168576	TRUE
B3GALT6	78.6231	-0.257467	0.138222	-1.86271	0.0625033	0.262599	TRUE
B3GALTL	338.177	-0.0331399	0.0767382	-0.431857	0.665845	0.860049	TRUE
B3GAT1	119.883	0.264033	0.172906	1.52703	0.126753	0.392354	TRUE
B3GAT2	1.55325	-0.102219	0.0993907	-1.02845	0.303736	NA	TRUE
B3GAT3	772.328	-0.0255448	0.0759997	-0.336118	0.736782	0.896694	TRUE
B3GNT1	0	NA	NA	NA	NA	NA	TRUE
B3GNT2	293.599	0.260015	0.0914676	2.8427	0.00447325	0.0466977	TRUE
B3GNT3	0.561777	-0.0415863	0.048383	-0.859522	0.390052	NA	TRUE
B3GNT4	0.445093	0.0562202	0.0540232	1.04067	0.298029	NA	FALSE
B3GNT5	1.34387	-0.106879	0.0957318	-1.11645	0.264232	NA	TRUE
B3GNT6	0.339021	0.0279187	0.0441576	0.632252	0.527222	NA	TRUE
B3GNT7	35.3141	0.12859	0.165681	0.776131	0.437672	0.727154	TRUE
B3GNT8	49.0146	-0.190167	0.161565	-1.17703	0.239185	0.543593	TRUE
B3GNT9	275.69	0.101522	0.106495	0.953303	0.340437	0.64346	TRUE
B3GNTL1	88.4593	0.0552415	0.139375	0.396353	0.691845	0.874582	TRUE
B4GALNT1	14.799	-0.159378	0.172817	-0.922236	0.356405	0.659041	TRUE
B4GALNT3	2.32232	-0.148544	0.111059	-1.33753	0.18105	0.471074	TRUE
B4GALNT4	1.66708	0.143191	0.104101	1.3755	0.168976	NA	TRUE
B4GALT1	353.846	-0.161205	0.114635	-1.40624	0.159652	0.442527	TRUE
B4GALT2	174.101	0.0728976	0.138298	0.527107	0.59812	0.825255	TRUE
B4GALT3	228.483	0.132501	0.0928616	1.42686	0.153619	0.433784	TRUE
B4GALT4	106.82	-0.336237	0.166834	-2.0154	0.0438627	0.212122	TRUE
B4GALT5	157.978	-0.0481036	0.135411	-0.355243	0.722408	0.889759	TRUE
B4GALT6	798.43	-0.306427	0.0814502	-3.76214	0.000168467	0.00464053	TRUE
B4GALT7	244.734	0.0787818	0.0937452	0.840382	0.400694	0.696533	TRUE
B9D1	0	NA	NA	NA	NA	NA	TRUE
B9D2	64.9058	0.0869574	0.155448	0.559399	0.57589	0.813059	TRUE
BAALC	164.409	0.137612	0.171637	0.801764	0.422689	0.71507	TRUE
BAAT	9.96615	-0.451344	0.122911	-3.67211	0.000240553	0.00596463	TRUE
BABAM1	751.768	0.16808	0.067208	2.5009	0.0123879	0.0948531	TRUE
BACE1	495.111	-0.445841	0.102365	-4.35539	1.32829e-05	0.0006493	TRUE
BACE2	139.217	-0.377994	0.129745	-2.91336	0.00357563	0.0400419	TRUE
BACH1	117.413	-0.0175974	0.135561	-0.129811	0.896716	0.965434	TRUE
BAD	186.307	0.102985	0.123926	0.83102	0.405963	0.701258	TRUE
BAG1	1279.82	0.0984614	0.0578873	1.70092	0.0889589	0.320418	TRUE
BAG2	715.713	-0.218801	0.0656394	-3.33339	0.000857953	0.0146651	TRUE
BAG3	5273.34	0.0525533	0.0585042	0.898281	0.369036	0.668991	TRUE
BAG4	92.8442	-0.205724	0.136831	-1.50349	0.132712	0.402694	TRUE
BAG5	564.695	-0.019756	0.0749378	-0.263631	0.792064	0.920052	TRUE
BAG6	3166.68	0.105096	0.0503931	2.08553	0.0370212	0.191872	TRUE
BAHCC1	327.709	0.0504575	0.099185	0.508721	0.610948	0.832287	TRUE
BAHD1	420.635	-0.0879464	0.0725274	-1.21259	0.225285	0.526322	TRUE
BAI1	10.7233	-0.253247	0.170659	-1.48394	0.137825	0.410164	TRUE
BAI2	13.3784	0.161257	0.173288	0.930572	0.352075	0.654187	TRUE
BAI3	0.89018	-0.015525	0.0757251	-0.205017	0.837559	NA	TRUE
BAIAP2	339.64	-0.0238608	0.15608	-0.152876	0.878496	0.957331	TRUE
BAIAP2L1	214.101	0.00435872	0.126498	0.0344568	0.972513	0.992574	TRUE
BAIAP2L2	4.2182	0.132116	0.14513	0.910328	0.362649	0.663961	TRUE
BAK1	224.532	0.40072	0.0925359	4.33043	1.48821e-05	0.000704494	TRUE
BAMBI	148.564	0.094008	0.122659	0.766417	0.443428	0.73029	FALSE
BANF1	2300.81	0.124228	0.0706098	1.75936	0.0785167	0.299036	TRUE
BANF2	0.120778	0.00618284	0.036177	0.170906	0.864298	NA	FALSE
BANK1	2.66189	-0.194355	0.124525	-1.56077	0.118578	0.378768	TRUE
BANP	352.003	-0.178564	0.0984857	-1.81309	0.0698174	0.280179	TRUE
BAP1	1733.29	-0.0262512	0.0831297	-0.315786	0.752165	0.903734	TRUE
BARD1	44.3549	-0.648129	0.165021	-3.92756	8.58138e-05	0.00279852	TRUE
BARHL1	0	NA	NA	NA	NA	NA	FALSE
BARHL2	0	NA	NA	NA	NA	NA	TRUE
BARX1	0.214445	-0.0156125	0.036177	-0.431558	0.666062	NA	TRUE
BARX2	0.218242	0.0124101	0.036177	0.343038	0.73157	NA	TRUE
BASP1	21.3104	-0.0342682	0.173779	-0.197194	0.843676	0.942943	TRUE
BATF	2.78422	-0.136363	0.124692	-1.0936	0.274128	0.58021	TRUE
BATF2	4.1097	-0.217756	0.141765	-1.53604	0.124529	0.388236	TRUE
BATF3	2.48392	-0.0783401	0.11923	-0.657053	0.511147	0.774136	TRUE
BAX	128.346	0.171885	0.118351	1.45233	0.146409	0.422333	TRUE
BAZ1A	197.099	-0.0405806	0.110465	-0.36736	0.71335	0.885534	TRUE
BAZ1B	1418.47	-0.0243234	0.0503678	-0.482916	0.629155	0.841789	TRUE
BAZ2A	924.101	0.0772922	0.0635575	1.2161	0.223948	0.525583	TRUE
BAZ2B	504.831	0.0763135	0.085534	0.8922	0.372286	0.672271	TRUE
BBC3	67.671	-0.0707973	0.166968	-0.424016	0.671554	0.86301	TRUE
BBOX1	0.676703	-0.105267	0.0614993	-1.71168	0.0869548	NA	TRUE
BBS1	325.767	-0.12854	0.0911991	-1.40945	0.158703	0.441341	TRUE
BBS10	80.2546	-0.0253819	0.143253	-0.177182	0.859365	0.949928	TRUE
BBS12	64.0269	-0.221512	0.139645	-1.58625	0.112683	0.367371	TRUE
BBS2	412.741	-0.0850081	0.116714	-0.728345	0.466402	0.745977	TRUE
BBS4	292.738	-0.025559	0.0851718	-0.300087	0.76411	0.908715	TRUE
BBS5	51.8745	-0.020135	0.14948	-0.1347	0.892849	0.964034	TRUE
BBS7	125.373	0.178448	0.119787	1.48971	0.1363	0.407841	TRUE
BBS9	117.955	-0.0581337	0.124981	-0.465139	0.641832	0.848174	TRUE
BBX	96.532	-0.098438	0.135437	-0.726818	0.467337	0.746557	TRUE
BCAM	3592.38	-0.0582392	0.0501634	-1.16099	0.245646	0.550199	TRUE
BCAN	3.50918	-0.13855	0.0788962	-1.75611	NA	NA	TRUE
BCAP29	1117.55	-0.112897	0.0624819	-1.80687	0.0707827	0.281513	TRUE
BCAP31	1273.22	-0.0547711	0.0608448	-0.900178	0.368026	0.668678	TRUE
BCAR1	717.104	-0.0188448	0.0829636	-0.227145	0.820311	0.932532	TRUE
BCAR3	282.771	-0.136365	0.121046	-1.12656	0.259927	0.564428	TRUE
BCAS1	1.76452	-0.158068	0.0991764	-1.5938	0.11098	0.364356	TRUE
BCAS2	1073.11	0.0551921	0.0736595	0.749288	0.453684	0.736901	TRUE
BCAS3	512.326	-0.000977984	0.0805352	-0.0121436	0.990311	0.997494	TRUE
BCAT1	55.7306	-0.592724	0.172574	-3.4346	0.000593418	0.0111568	TRUE
BCAT2	3310.04	0.117159	0.086373	1.35643	0.174962	0.464653	FALSE
BCCIP	532.171	-0.072801	0.0981243	-0.741927	0.458132	0.740533	TRUE
BCDIN3D	70.0455	-0.0977593	0.135588	-0.721003	0.470908	0.749385	TRUE
BCHE	361.895	-0.366603	0.139178	-2.63407	0.00843688	0.0728607	TRUE
BCKDHA	7629.36	0.226906	0.131582	1.72445	0.0846272	0.312117	TRUE
BCKDHB	3708.59	-0.173025	0.0685142	-2.52538	0.0115572	0.09006	TRUE
BCKDK	3612.56	0.258154	0.108113	2.38781	0.0169493	0.115767	TRUE
BCL10	310.049	-0.000504951	0.0932459	-0.00541526	0.995679	0.99854	TRUE
BCL11A	114.035	-0.0720901	0.153302	-0.470249	0.638177	0.846617	TRUE
BCL11B	87.5124	-0.236629	0.171518	-1.37962	0.167704	0.454305	TRUE
BCL2	134.631	-0.309584	0.124653	-2.48357	0.0130073	0.0977961	TRUE
BCL2A1	20.2767	-0.370882	0.173505	-2.13759	0.0325497	0.177479	FALSE
BCL2L1	295.426	0.0678679	0.147107	0.461351	0.644546	0.849414	TRUE
BCL2L10	0.222233	-0.0016012	0.036177	-0.0442602	0.964697	NA	FALSE
BCL2L11	36.6581	-0.180647	0.173037	-1.04398	0.296495	0.60119	TRUE
BCL2L12	76.2864	0.0390748	0.1402	0.278708	0.780469	0.915772	TRUE
BCL2L13	1244.97	-0.14342	0.0866977	-1.65425	0.0980762	0.339289	TRUE
BCL2L14	0.331387	-0.0139887	0.0440487	-0.317574	0.750808	NA	TRUE
BCL2L15	20.1328	0.202536	0.174545	1.16037	0.2459	0.550377	TRUE
BCL2L2	1378.23	-0.047841	0.0572281	-0.835969	0.403172	0.698947	FALSE
BCL3	66.3981	0.0545366	0.158216	0.344696	0.730323	0.894062	TRUE
BCL6	329.816	0.180841	0.142567	1.26847	0.204631	0.50095	TRUE
BCL6B	841.101	0.457286	0.127538	3.58548	0.000336455	0.0074329	TRUE
BCL7B	787.481	0.118379	0.0719015	1.64641	0.0996799	0.342911	TRUE
BCL7C	218.166	0.205388	0.0967684	2.12247	0.0337983	0.181396	TRUE
BCL9	287.494	-0.00214058	0.109558	-0.0195383	0.984412	0.99569	TRUE
BCL9L	602.123	0.121904	0.0937568	1.30021	0.193528	0.487155	TRUE
BCLAF1	1518.27	-0.100687	0.0779394	-1.29186	0.196407	0.491033	TRUE
BCMO1	0.798039	0.00367555	0.0672665	0.0546416	0.956424	NA	TRUE
BCO2	6.35655	-0.216736	0.155962	-1.38967	0.16463	0.449784	TRUE
BCOR	490.536	0.00446428	0.0758068	0.0588903	0.95304	0.98624	TRUE
BCORL1	364.003	-0.110626	0.0853085	-1.29678	0.194707	0.488767	TRUE
BCR	330.188	-0.484239	0.10639	-4.55155	5.3253e-06	0.00030943	TRUE
BCS1L	440.2	0.204313	0.0692649	2.94973	0.00318055	0.0369616	TRUE
BDH1	1920.27	0.433248	0.11825	3.66382	0.000248477	0.00609243	TRUE
BDH2	309.746	0.197016	0.0911388	2.16171	0.0306407	0.171149	TRUE
BDKRB1	0.223383	-0.0156125	0.036177	-0.431558	0.666062	NA	FALSE
BDKRB2	37.3369	-0.121223	0.170502	-0.710973	0.477101	0.752907	TRUE
BDNF	643.097	-0.02384	0.101235	-0.235492	0.813827	0.929489	TRUE
BDP1	40.481	-0.0111759	0.170369	-0.0655981	0.947698	0.984651	TRUE
BEAN1	242.109	1.39765	0.108505	12.881	5.76019e-38	2.95651e-34	TRUE
BECN1	1594.94	0.000934431	0.0790179	0.0118256	0.990565	0.997494	TRUE
BEGAIN	18.5619	-0.0335675	0.174307	-0.192577	0.84729	0.944412	TRUE
BEND3	168.738	0.249337	0.108186	2.30471	0.0211831	0.134285	TRUE
BEND4	139.573	-0.155869	0.160038	-0.973953	0.33008	0.635381	TRUE
BEND5	90.162	0.0110084	0.136249	0.0807956	0.935604	0.981961	TRUE
BEND6	27.9597	-0.457929	0.175069	-2.6157	0.00890452	0.0755021	TRUE
BEND7	46.9903	0.332438	0.154021	2.1584	0.0308967	0.17198	TRUE
BEST1	12.7556	-0.00114231	0.173491	-0.0065843	0.994747	0.99854	TRUE
BEST2	1.11381	-0.039184	0.069808	-0.561311	0.574586	NA	TRUE
BEST3	1.9775	0.0345917	0.109891	0.314783	0.752926	0.903734	TRUE
BEST4	0	NA	NA	NA	NA	NA	FALSE
BET1	403.835	-0.122202	0.0767478	-1.59226	0.111327	0.365065	TRUE
BET1L	266.74	0.0988793	0.089516	1.1046	0.269333	0.575591	TRUE
BEX1	50.1558	-0.842803	0.172456	-4.88707	1.02347e-06	7.96717e-05	FALSE
BEX2	0.874002	-0.0412296	0.0676976	-0.609026	0.542507	NA	TRUE
BEX4	4.96023	-0.0189535	0.111251	-0.170367	0.864721	0.952381	FALSE
BFAR	2469.73	0.0576195	0.081088	0.710579	0.477345	0.752907	TRUE
BFSP1	33.0559	0.249887	0.165945	1.50584	0.132107	0.401775	TRUE
BFSP2	52.9362	-0.0522957	0.170919	-0.305968	0.759629	0.906656	TRUE
BGLAP	1.57104	0.0451234	0.0993383	0.454239	0.649657	NA	TRUE
BGN	2550.2	-0.392757	0.118385	-3.31762	0.000907886	0.0152118	TRUE
BHLHA15	7.03277	-0.0686904	0.159243	-0.431357	0.666209	0.860049	TRUE
BHLHA9	0.334013	-0.0140464	0.044138	-0.318239	0.750304	NA	TRUE
BHLHB9	258.936	-0.216603	0.151026	-1.43421	0.151512	0.431038	TRUE
BHLHE22	7.08576	-0.101351	0.160142	-0.632882	0.52681	0.783906	TRUE
BHLHE23	0	NA	NA	NA	NA	NA	FALSE
BHLHE40	973.391	0.328234	0.156073	2.10307	0.0354592	0.186795	TRUE
BHLHE41	501.201	0.362902	0.103164	3.51773	0.000435258	0.00890053	TRUE
BHMT	32.5572	-0.147526	0.0720977	-2.04619	0.0407373	0.203594	TRUE
BHMT2	6.79569	-0.0863997	0.0556718	-1.55195	0.120675	0.380924	TRUE
BICC1	670.922	-0.0991515	0.0884941	-1.12043	0.26253	0.567838	TRUE
BICD1	94.0914	-0.305983	0.12312	-2.48523	0.0129467	0.0976726	TRUE
BICD2	3981.59	0.0166258	0.034044	0.488363	0.625293	0.840445	TRUE
BID	41.3167	-0.255743	0.169066	-1.51268	0.130362	0.398628	TRUE
BIK	7.66708	-0.343322	0.141471	-2.4268	0.0152328	0.108395	TRUE
BIN1	176.82	-0.0945314	0.132581	-0.713008	0.475841	0.752181	TRUE
BIN2	39.9039	-0.123542	0.168765	-0.732035	0.464147	0.74424	TRUE
BIN2A	0	NA	NA	NA	NA	NA	FALSE
BIN3	169.538	0.0116164	0.115758	0.100351	0.920066	0.976104	TRUE
BIRC2	596.289	-0.0797579	0.0740596	-1.07694	0.281506	0.586478	TRUE
BIRC3	95.8381	0.0908881	0.12832	0.70829	0.478765	0.753768	TRUE
BIRC5	6.37306	-0.0189865	0.157356	-0.120659	0.903961	0.96875	TRUE
BIRC6	1834.76	0.01374	0.0797689	0.172248	0.863242	0.951891	TRUE
BIRC7	0	NA	NA	NA	NA	NA	FALSE
BLCAP	888.431	0.0852519	0.105535	0.807807	0.419202	0.71188	TRUE
BLES03	593.202	-0.0263971	0.0673678	-0.391836	0.695179	0.876043	FALSE
BLK	3.66071	-0.225653	0.133195	-1.69415	0.0902372	0.322758	TRUE
BLM	36.5135	0.203476	0.164215	1.23909	0.215314	0.514894	TRUE
BLMH	575.906	0.0493559	0.0749929	0.658141	0.510448	0.773977	TRUE
BLNK	90.1244	0.488975	0.147971	3.30454	0.000951334	0.0156503	TRUE
BLOC1S1	921.821	0.0430532	0.0648572	0.663816	0.506808	0.771741	FALSE
BLOC1S2	263.775	-0.140971	0.161246	-0.874263	0.381975	0.680896	TRUE
BLOC1S3	166.317	0.0034799	0.104589	0.0332722	0.973458	0.992574	TRUE
BLOC1S4	195.886	-0.0374349	0.106627	-0.351084	0.725526	0.891316	TRUE
BLOC1S5	680.86	-0.0600503	0.0865713	-0.693651	0.487901	0.760241	TRUE
BLOC1S6	607.704	-0.384673	0.117167	-3.28311	0.00102668	0.0165363	TRUE
BLVRA	262.971	0.124843	0.0853281	1.4631	0.143441	0.417603	TRUE
BLVRB	831.238	0.105157	0.0663092	1.58585	0.112773	0.367586	TRUE
BLZF1	220.064	0.00578629	0.0915205	0.063224	0.949588	0.984828	TRUE
BMF	158.996	0.154327	0.123909	1.24548	0.212955	0.511764	TRUE
BMI1	383.656	0.0402656	0.0860601	0.467878	0.639872	0.847346	TRUE
BMP1	403.534	0.0203076	0.104805	0.193765	0.84636	0.944093	TRUE
BMP10	2.54395	-0.092435	0.118601	-0.779375	0.435759	0.72568	TRUE
BMP15	2.54291	-0.0782646	0.110429	-0.708733	0.47849	0.753661	FALSE
BMP2	32.2009	0.0919668	0.174193	0.52796	0.597527	0.824881	TRUE
BMP2K	542.834	-0.275387	0.0745722	-3.69288	0.000221726	0.00561537	TRUE
BMP3	2.8848	-0.0140153	0.127101	-0.110269	0.912196	0.973069	TRUE
BMP4	116.097	0.0642791	0.140111	0.458772	0.646398	0.850311	TRUE
BMP5	17.0387	-0.222637	0.168006	-1.32518	0.185112	0.47657	TRUE
BMP6	226.968	0.0308788	0.105045	0.293958	0.76879	0.910812	TRUE
BMP7	4.87419	-0.0404095	0.142608	-0.283362	0.7769	0.914657	TRUE
BMP8A	0.654285	-0.0739744	0.0518622	-1.42637	0.153763	NA	TRUE
BMP8B	0.677938	-0.04971	0.0505629	-0.983132	0.325542	NA	TRUE
BMPER	127.759	0.0793594	0.173838	0.456514	0.64802	0.850933	TRUE
BMPR1A	946.733	0.0897945	0.137092	0.654992	0.512473	0.775338	TRUE
BMPR1B	10.1783	0.193264	0.118903	1.62539	0.104079	0.350573	TRUE
BMPR2	3678.81	-0.311814	0.0602799	-5.17277	2.30649e-07	2.20592e-05	FALSE
BMS1	646.736	0.088722	0.0734625	1.20772	0.227156	0.527722	TRUE
BMX	24.2475	-0.116159	0.173611	-0.669076	0.503447	0.769404	TRUE
BMYC	138.718	0.0155764	0.124895	0.124716	0.900748	0.967408	FALSE
BNC1	3.81568	-0.070278	0.0949472	-0.74018	0.459191	0.741155	TRUE
BNC2	12.3634	-0.034833	0.168325	-0.20694	0.836057	0.939379	TRUE
BNIP1	444.129	0.0647786	0.0753549	0.859647	0.389983	0.688485	TRUE
BNIP2	2237.24	-0.0818889	0.0556835	-1.47061	0.141396	0.41532	TRUE
BNIP3	4854.94	-0.145696	0.0804399	-1.81124	0.0701031	0.280668	TRUE
BNIP3L	1622.41	-0.124105	0.0875073	-1.41822	0.156126	0.437414	FALSE
BNIPL	0.66517	-0.0485004	0.06561	-0.739223	0.459772	NA	TRUE
BOC	733.289	-0.04443	0.0936729	-0.47431	0.635279	0.844828	TRUE
BOD1	707.957	0.256907	0.0720407	3.56613	0.000362288	0.00782573	TRUE
BOD1L1	758.044	-0.0246366	0.0689257	-0.357437	0.720765	0.888817	TRUE
BOK	239.441	0.0795718	0.169959	0.468183	0.639654	0.847332	TRUE
BOLA1	348.546	0.261241	0.09193	2.84174	0.00448683	0.0467901	TRUE
BOLA2	0	NA	NA	NA	NA	NA	TRUE
BOLA3	1399.75	0.0886678	0.0923347	0.960286	0.336911	0.640405	TRUE
BOLL	0	NA	NA	NA	NA	NA	TRUE
BOP1	325.052	0.203225	0.0963066	2.11018	0.0348426	0.18462	TRUE
BORA	60.14	0.0536352	0.160801	0.333551	0.738718	0.897546	TRUE
BPGM	651.911	-0.334022	0.16312	-2.04771	0.0405886	0.203305	TRUE
BPHL	460.815	0.142174	0.129996	1.09368	0.274094	0.58021	TRUE
BPI	0.212144	0.0124101	0.036177	0.343038	0.73157	NA	TRUE
BPIFA1	0	NA	NA	NA	NA	NA	TRUE
BPIFA2	0.227865	-0.0016012	0.036177	-0.0442602	0.964697	NA	TRUE
BPIFA2F	0	NA	NA	NA	NA	NA	FALSE
BPIFA3	0	NA	NA	NA	NA	NA	TRUE
BPIFA5	0	NA	NA	NA	NA	NA	FALSE
BPIFA6	1.37068	-0.117854	0.0700325	-1.68285	0.0924043	NA	FALSE
BPIFB1	0.435775	0.0117456	0.0376178	0.312234	0.754863	NA	TRUE
BPIFB2	0	NA	NA	NA	NA	NA	FALSE
BPIFB3	0	NA	NA	NA	NA	NA	TRUE
BPIFB4	2.50304	0.0870293	0.107208	0.81178	0.416918	0.710695	FALSE
BPIFB5	0.786569	0.0027995	0.0672288	0.0416413	0.966785	NA	FALSE
BPIFB6	0	NA	NA	NA	NA	NA	TRUE
BPIFC	0.664335	-0.00966897	0.0570554	-0.169466	0.86543	NA	TRUE
BPNT1	978.19	0.0713857	0.0763202	0.935345	0.34961	0.651612	TRUE
BPTF	1085.88	-0.0177073	0.0919683	-0.192537	0.847321	0.944412	TRUE
BRAF	433.976	0.215031	0.0861051	2.49731	0.0125141	0.0956285	TRUE
BRAP	810.779	0.0846536	0.0795725	1.06385	0.287395	0.593011	TRUE
BRAT1	170.866	0.168418	0.104125	1.61745	0.10578	0.353857	TRUE
BRCA1	21.3022	-0.11618	0.174887	-0.664316	0.506488	0.771741	TRUE
BRCA2	36.849	-0.16233	0.168809	-0.961617	0.336242	0.640003	TRUE
BRCC3	652.66	0.00555708	0.0703142	0.0790322	0.937007	0.982021	TRUE
BRD1	682.221	0.0350382	0.0673289	0.520403	0.602783	0.828053	TRUE
BRD2	0	NA	NA	NA	NA	NA	TRUE
BRD3	965.005	0.117839	0.057012	2.06692	0.0387417	0.19752	TRUE
BRD4	1002.25	0.059457	0.0592212	1.00398	0.315388	0.621062	TRUE
BRD7	803.474	0.101443	0.0616565	1.6453	0.0999082	0.34339	TRUE
BRD8	600.958	-0.0242478	0.0665648	-0.364274	0.715654	0.886376	TRUE
BRD9	669.252	0.0052021	0.0655968	0.0793041	0.936791	0.982021	TRUE
BRDT	0.11231	-0.00782843	0.036177	-0.216393	0.828682	NA	TRUE
BRE	765.638	-0.135604	0.0686929	-1.97407	0.0483741	0.224154	TRUE
BRF1	459.074	-0.0917211	0.0823963	-1.11317	0.265635	0.571126	TRUE
BRF2	107.068	-0.0427373	0.120318	-0.355202	0.722438	0.889759	TRUE
BRI3	964.359	0.15251	0.0757009	2.01464	0.0439429	0.212132	TRUE
BRI3BP	84.2262	0.158976	0.134932	1.17819	0.238721	0.543427	TRUE
BRINP1	0.647296	0.0130685	0.0495887	0.263538	0.792136	NA	TRUE
BRINP2	4.55555	-0.172141	0.134316	-1.28161	0.199979	0.495569	TRUE
BRINP3	0.223409	0.0124101	0.036177	0.343038	0.73157	NA	FALSE
BRIP1	7.5472	0.122768	0.166063	0.739287	0.459733	0.74133	TRUE
BRIX1	358.439	-0.119464	0.0816088	-1.46386	0.143231	0.41726	TRUE
BRK1	1081.22	-0.0449431	0.0654991	-0.686164	0.49261	0.762716	TRUE
BRMS1	0	NA	NA	NA	NA	NA	TRUE
BRMS1L	0.21376	-0.0016012	0.036177	-0.0442602	0.964697	NA	TRUE
BROX	1167.66	-0.34386	0.149968	-2.29289	0.0218541	0.136812	TRUE
BRPF1	594.759	0.101433	0.104749	0.96835	0.33287	0.637345	TRUE
BRPF3	227.6	0.119333	0.11463	1.04103	0.297861	0.602873	TRUE
BRS3	0.228001	-0.0016012	0.036177	-0.0442602	0.964697	NA	TRUE
BRSK1	29.1855	0.206245	0.173943	1.18571	0.235738	0.539781	TRUE
BRSK2	7.03464	-0.0371677	0.152853	-0.243159	0.807882	0.927961	TRUE
BRWD1	849.112	0.0493811	0.0799377	0.617744	0.536744	0.790939	TRUE
BRWD3	161.397	-0.0103798	0.119157	-0.0871101	0.930584	0.980606	TRUE
BSCL2	302.676	0.136643	0.0958638	1.42538	0.154046	0.434592	TRUE
BSDC1	1284.4	-0.0338346	0.054654	-0.619069	0.535871	0.790336	TRUE
BSG	11864.8	0.121345	0.0837659	1.44862	0.147445	0.42389	FALSE
BSN	7.28666	0.213735	0.163607	1.3064	0.191417	0.48406	TRUE
BSND	0	NA	NA	NA	NA	NA	TRUE
BSPH2	0	NA	NA	NA	NA	NA	FALSE
BSPRY	11.268	0.00860741	0.168533	0.0510725	0.959268	0.988004	TRUE
BST1	56.1409	-0.0648585	0.172986	-0.374934	0.707709	0.882487	TRUE
BST2	1494.43	-0.41926	0.103225	-4.06163	4.8732e-05	0.00181689	FALSE
BSX	0	NA	NA	NA	NA	NA	FALSE
BTAF1	453.739	-0.112269	0.0858946	-1.30705	0.191196	0.483739	TRUE
BTBD1	6892.26	-0.138419	0.0760736	-1.81955	0.0688283	0.277439	FALSE
BTBD10	464.416	0.00721008	0.0786673	0.0916529	0.926974	0.978963	TRUE
BTBD11	487.096	-0.127697	0.147841	-0.863745	0.387728	0.685749	TRUE
BTBD16	0.990644	-0.00150776	0.0832297	-0.0181156	0.985547	NA	TRUE
BTBD17	0	NA	NA	NA	NA	NA	TRUE
BTBD18	0.11231	-0.00782843	0.036177	-0.216393	0.828682	NA	TRUE
BTBD2	833.635	-0.100257	0.0740582	-1.35376	0.175812	0.465921	TRUE
BTBD3	267.816	-0.0702766	0.0868282	-0.809375	0.4183	0.711649	TRUE
BTBD6	758.673	0.190542	0.0694124	2.74507	0.00604972	0.0582681	TRUE
BTBD7	1019.03	-0.180154	0.0597086	-3.01723	0.002551	0.0319352	TRUE
BTBD9	491.966	-0.37028	0.109045	-3.39566	0.000684643	0.0124171	TRUE
BTC	13.5624	-0.156753	0.174	-0.900877	0.367654	0.668453	TRUE
BTD	192.894	-0.095935	0.104464	-0.918353	0.358434	0.660992	TRUE
BTF3	776.035	-0.0713001	0.0675233	-1.05593	0.290999	0.596406	TRUE
BTF3L4	153.694	-0.108669	0.111526	-0.974384	0.329866	0.635316	TRUE
BTG1	896.862	-0.00121692	0.0915855	-0.0132872	0.989399	0.997105	TRUE
BTG2	1391.66	0.0399368	0.170071	0.234824	0.814346	0.929513	TRUE
BTG3	96.4386	-0.0120455	0.148188	-0.0812855	0.935215	0.981961	TRUE
BTG4	0	NA	NA	NA	NA	NA	TRUE
BTK	11.6951	-0.281389	0.166267	-1.69239	0.0905708	0.323491	TRUE
BTLA	16.2172	-0.31902	0.174146	-1.8319	0.0669657	0.273221	TRUE
BTN1A1	1.10773	0.0610662	0.0909298	0.671575	0.501855	NA	TRUE
BTN2A2	13.4511	-0.00900455	0.173537	-0.0518882	0.958618	0.987999	TRUE
BTN3A2	0	NA	NA	NA	NA	NA	FALSE
BTNL2	0.217852	-0.0016012	0.036177	-0.0442602	0.964697	NA	TRUE
BTNL3	0.325549	0.00462604	0.036177	0.127872	0.89825	NA	TRUE
BTNL5	0	NA	NA	NA	NA	NA	FALSE
BTNL7	0	NA	NA	NA	NA	NA	FALSE
BTNL8	0.116161	-0.00782843	0.036177	-0.216393	0.828682	NA	TRUE
BTRC	756.777	-0.2672	0.102416	-2.60897	0.00908141	0.0764546	TRUE
BUB1	61.6248	0.0355774	0.141643	0.251176	0.801678	0.925564	TRUE
BUB1B	12.5748	-0.0352036	0.168649	-0.208739	0.834652	0.939336	TRUE
BUB3	670.794	-0.00610634	0.0634078	-0.0963026	0.92328	0.977494	TRUE
BUD13	117.084	0.0548576	0.12154	0.451352	0.651736	0.852483	TRUE
BUD31	696.009	-0.115922	0.089598	-1.29381	0.195732	0.490129	TRUE
BVES	928.083	0.00377138	0.115683	0.0326009	0.973993	0.992574	TRUE
BYSL	373.777	0.0330514	0.0919641	0.359395	0.7193	0.88854	TRUE
BZRAP1	1.00456	-0.0403638	0.0837443	-0.481989	0.629814	NA	TRUE
BZW1	2683.41	-0.0080743	0.0424085	-0.190394	0.849001	0.945155	TRUE
BZW2	8139.35	-0.286783	0.0785303	-3.65188	0.000260332	0.00629291	TRUE
C1D	93.7002	-0.0186912	0.130438	-0.143296	0.886056	0.961488	TRUE
C1GALT1	442.389	-0.188998	0.0974221	-1.94	0.0523802	0.236317	TRUE
C1GALT1C1	269.864	0.00492836	0.107476	0.0458555	0.963425	0.988791	TRUE
C1H6ORF35	1022.72	-0.138257	0.112976	-1.22377	0.221037	0.522575	FALSE
C1QA	228.68	-0.285322	0.170627	-1.67219	0.0944864	0.331942	TRUE
C1QB	218.07	-0.411817	0.170033	-2.42199	0.0154358	0.109082	TRUE
C1QBP	2888.92	0.0611777	0.0521551	1.173	0.240798	0.544625	TRUE
C1QC	297.772	-0.352297	0.169877	-2.07383	0.038095	0.195268	TRUE
C1QL1	0.106538	0.00618284	0.036177	0.170906	0.864298	NA	FALSE
C1QL2	0	NA	NA	NA	NA	NA	TRUE
C1QL3	3.66403	0.0516458	0.136387	0.37867	0.704933	0.88087	TRUE
C1QL4	2.03632	0.100711	0.106246	0.947906	0.343178	0.645838	TRUE
C1QTNF1	312.824	0.147774	0.127207	1.16169	0.245363	0.550199	TRUE
C1QTNF2	122.102	0.110673	0.122489	0.903539	0.36624	0.667065	TRUE
C1QTNF3	2.99402	-0.190924	0.12386	-1.54145	0.123206	0.38576	TRUE
C1QTNF4	5.05876	-0.0199171	0.145615	-0.136779	0.891205	0.96334	TRUE
C1QTNF5	81.9139	-0.231561	0.155678	-1.48743	0.1369	0.408683	TRUE
C1QTNF6	69.2372	-0.0513258	0.149283	-0.343815	0.730986	0.894447	TRUE
C1QTNF7	162.075	-0.0903935	0.161134	-0.560982	0.57481	0.812536	TRUE
C1QTNF9	792.876	0.0633515	0.123744	0.511955	0.608682	0.831189	TRUE
C1R	2764.29	-0.185508	0.0860845	-2.15495	0.0311658	0.173021	TRUE
C1RL	23.1529	-0.0125643	0.174224	-0.072116	0.94251	0.983316	TRUE
C1S	2472.07	-0.56016	0.0947785	-5.9102	3.417e-09	6.26369e-07	TRUE
C2	246.807	-1.1128	0.168729	-6.59515	4.24816e-11	1.30826e-08	TRUE
C2CD2	234.18	-0.207459	0.105246	-1.97119	0.0487022	0.224997	TRUE
C2CD2L	407.541	-0.00213516	0.0803485	-0.0265737	0.9788	0.99424	TRUE
C2CD3	268.736	-0.206689	0.111852	-1.84789	0.0646189	0.267454	TRUE
C2CD4A	2.29314	-0.145229	0.110161	-1.31833	0.187392	0.478945	TRUE
C2CD4B	717.78	-0.332063	0.162826	-2.03937	0.0414133	0.205042	FALSE
C2CD4C	7.99872	-0.0913987	0.158494	-0.576669	0.564163	0.806815	TRUE
C2CD4D	8.86656	0.0593427	0.166292	0.356859	0.721197	0.88898	FALSE
C2CD5	521.428	-0.113444	0.0887599	-1.2781	0.201215	0.497412	TRUE
C3	146.817	-0.619299	0.133838	-4.62721	3.70628e-06	0.000235181	TRUE
C3AR1	27.3646	-0.427222	0.171316	-2.49377	0.0126395	0.0962613	TRUE
C4A	119.27	-0.300862	0.143478	-2.09691	NA	NA	TRUE
C4B	212.321	-1.03986	0.174981	-5.94271	2.80345e-09	5.32933e-07	FALSE
C4BPA	12.8952	-0.764734	0.149876	-5.10245	3.35289e-07	3.09646e-05	TRUE
C4BPB	21.5777	-0.529284	0.172895	-3.06131	0.00220371	0.0288154	TRUE
C5	6.49141	-0.443645	0.11706	-3.78989	0.000150712	0.00431349	TRUE
C5AR1	64.5981	-0.387022	0.174533	-2.21747	0.0265908	0.155269	TRUE
C5AR2	34.0839	-0.523652	0.175074	-2.99104	0.00278032	0.0337363	TRUE
C6	31.0848	-0.244016	0.165343	-1.47581	0.139994	0.413504	TRUE
C7	12261	-0.490599	0.167678	-2.92583	0.00343536	0.0389492	TRUE
C8A	9.21958	-0.38191	0.110597	-3.45316	0.000554052	0.0106593	TRUE
C8B	4.94467	-0.261901	0.092564	-2.8294	0.00466349	0.0481613	TRUE
C8G	37.7695	0.138079	0.163855	0.842687	0.399404	0.695525	TRUE
C9	20.59	-0.175569	0.077304	-2.27115	0.0231378	0.141886	TRUE
CA1	2.38868	-0.154326	0.0731917	-2.10852	0.0349861	0.185029	TRUE
CA10	0.108688	-0.00782843	0.036177	-0.216393	0.828682	NA	TRUE
CAAP1	115.754	-0.0852158	0.116874	-0.729125	0.465925	0.745461	TRUE
CAB39	2440.34	-0.103872	0.0548374	-1.89418	0.0582009	0.250792	TRUE
CAB39L	793.637	-0.159191	0.0803691	-1.98074	0.0476201	0.221929	FALSE
CABIN1	65.3281	-0.289281	0.152601	-1.89568	0.0580029	0.250457	TRUE
CABLES1	123.231	0.165134	0.127118	1.29906	0.193923	0.487594	TRUE
CABLES2	316.854	-0.0172298	0.0985995	-0.174745	0.86128	0.951224	TRUE
CABP1	31.2638	0.375811	0.167703	2.24094	0.02503	0.149079	TRUE
CABP2	1.34662	-0.134119	0.0687376	-1.95118	0.0510357	NA	TRUE
CABP4	8.89464	0.231403	0.168307	1.37489	0.169167	0.456028	FALSE
CABP5	2.07725	0.0111776	0.100682	0.111019	0.911601	0.972561	FALSE
CABP7	3.16139	-0.0357526	0.124704	-0.286699	0.774343	0.913731	TRUE
CABS1	0	NA	NA	NA	NA	NA	FALSE
CABYR	4.56544	0.00217284	0.140256	0.0154919	0.98764	0.996506	TRUE
CACFD1	254.183	0.0499805	0.0997658	0.500979	0.616386	0.835079	TRUE
CACHD1	139.827	0.140181	0.12066	1.16179	0.245322	0.550199	TRUE
CACNA1A	299.205	-0.0357651	0.169178	-0.211405	0.832571	0.93902	TRUE
CACNA1B	0.441626	-0.00704519	0.0536707	-0.131267	0.895564	NA	FALSE
CACNA1C	3565.58	-0.205679	0.108242	-1.90017	0.0574102	0.249015	TRUE
CACNA1D	32.3904	-0.325991	0.174503	-1.86811	0.0617464	0.260271	TRUE
CACNA1E	3.28489	0.00440428	0.111029	0.0396678	0.968358	0.990289	TRUE
CACNA1F	0.665717	0.0460758	0.0584432	0.788385	0.430472	NA	FALSE
CACNA1G	275.03	-0.622434	0.168508	-3.6938	0.000220927	0.00560433	TRUE
CACNA1H	482.569	-0.157344	0.162686	-0.96716	0.333464	0.63769	TRUE
CACNA1I	0.434768	-0.00700107	0.0535065	-0.130845	0.895898	NA	FALSE
CACNA1S	1.65139	0.0656445	0.105558	0.621884	0.534018	NA	TRUE
CACNA2D1	2227.01	-0.251908	0.0659735	-3.81832	0.000134362	0.00391863	TRUE
CACNA2D2	832.03	-0.301003	0.0816048	-3.68855	0.000225537	0.00569314	TRUE
CACNA2D3	7.54461	-0.306078	0.142729	-2.14447	0.0319953	0.175826	TRUE
CACNA2D4	0.241557	0.0124101	0.036177	0.343038	0.73157	NA	FALSE
CACNB1	11.7408	-0.227885	0.172103	-1.32412	0.185462	0.476751	TRUE
CACNB2	1482.08	-0.200495	0.0777919	-2.57733	0.00995677	0.0812476	TRUE
CACNB3	45.3333	-0.101548	0.155512	-0.652993	0.513761	0.775882	TRUE
CACNB4	11.7476	0.0853518	0.157055	0.543452	0.586818	0.818886	TRUE
CACNG1	0.111704	0.00618284	0.036177	0.170906	0.864298	NA	TRUE
CACNG2	0	NA	NA	NA	NA	NA	TRUE
CACNG3	0	NA	NA	NA	NA	NA	FALSE
CACNG4	22.3496	0.0202516	0.173034	0.117038	0.90683	0.970352	TRUE
CACNG5	0.212144	0.0124101	0.036177	0.343038	0.73157	NA	TRUE
CACNG6	71.437	0.110231	0.158442	0.695718	0.486605	0.759606	TRUE
CACNG7	24.2048	0.568147	0.174213	3.26122	0.00110935	0.0175198	FALSE
CACNG8	0.116161	-0.00782843	0.036177	-0.216393	0.828682	NA	TRUE
CACTIN	335.471	0.112009	0.0987399	1.13438	0.256634	0.561554	TRUE
CACUL1	898.772	-0.106485	0.072015	-1.47864	0.139235	0.412694	TRUE
CACYBP	1207.54	-0.120259	0.0722713	-1.66399	0.0961141	0.335441	TRUE
CAD	408.146	0.00147071	0.080887	0.0181823	0.985493	0.996037	TRUE
CADM1	7.76204	-0.365339	0.165384	-2.20903	0.0271728	0.15784	TRUE
CADM2	20.3431	-0.00528054	0.174183	-0.030316	0.975815	0.993034	TRUE
CADM3	579.817	-0.182502	0.143653	-1.27044	0.203929	0.500571	TRUE
CADM4	30.3005	-0.0509484	0.170288	-0.29919	0.764795	0.909228	FALSE
CADPS	252.113	0.463631	0.122869	3.77339	0.000161043	0.00448483	TRUE
CADPS2	67.2818	0.11157	0.166194	0.671325	0.502014	0.768143	TRUE
CAGE1	37.7871	-0.0543785	0.170711	-0.318541	0.750075	0.903119	TRUE
CALB1	0.21591	-0.0156125	0.036177	-0.431558	0.666062	NA	TRUE
CALB2	0	NA	NA	NA	NA	NA	TRUE
CALCA	0	NA	NA	NA	NA	NA	TRUE
CALCB	0	NA	NA	NA	NA	NA	TRUE
CALCOCO1	7.40269	-0.260953	0.100785	-2.58921	NA	NA	TRUE
CALCOCO2	0	NA	NA	NA	NA	NA	TRUE
CALCR	0.11231	-0.00782843	0.036177	-0.216393	0.828682	NA	TRUE
CALCRL	1426.19	-0.126633	0.110803	-1.14286	0.253095	0.557693	TRUE
CALD1	2008.44	-0.0740663	0.0868631	-0.852678	0.393838	0.690815	TRUE
CALHM1	0	NA	NA	NA	NA	NA	TRUE
CALHM2	167.63	-0.00258556	0.119803	-0.0215817	0.982782	0.9954	TRUE
CALHM3	0	NA	NA	NA	NA	NA	FALSE
CALM1	4682.31	-0.051058	0.0645517	-0.790963	0.428966	0.721015	TRUE
CALM2	3932.07	-0.219228	0.0865445	-2.53312	0.0113051	0.0888834	TRUE
CALM3	1593.85	-0.226993	0.0896131	-2.53303	0.0113081	0.0888834	TRUE
CALML3	0.534849	0.0510374	0.0482532	1.0577	0.290193	NA	TRUE
CALML4	0.993655	-0.00083418	0.0782765	-0.0106568	0.991497	NA	TRUE
CALML5	0.986008	0.0909582	0.0736532	1.23495	0.216848	NA	TRUE
CALN1	0	NA	NA	NA	NA	NA	TRUE
CALR	5594.61	-0.216788	0.0563779	-3.84527	0.000120419	0.00365004	TRUE
CALR3	79.1809	-0.165892	0.138307	-1.19945	0.230354	0.531941	TRUE
CALR4	3.00289	-0.123071	0.123305	-0.998104	0.318229	0.623622	FALSE
CALU	6587.62	-0.187101	0.0860073	-2.17541	0.0295994	0.16713	TRUE
CALY	0.107222	-0.00782843	0.036177	-0.216393	0.828682	NA	TRUE
CAMK1	671.567	0.0396744	0.0812974	0.488016	0.625539	0.840592	TRUE
CAMK1D	62.4564	-0.775896	0.167723	-4.62607	3.72673e-06	0.000235181	TRUE
CAMK1G	0.336689	-0.0141456	0.0442911	-0.319379	0.749439	NA	TRUE
CAMK2A	155.876	-0.125068	0.115789	-1.08013	0.280083	0.585252	TRUE
CAMK2B	54.5626	-0.889021	0.167458	-5.30891	1.1028e-07	1.21164e-05	TRUE
CAMK2D	3758.35	-0.136606	0.0687726	-1.98634	0.0469956	0.220353	TRUE
CAMK2G	489.094	0.066892	0.0914025	0.73184	0.464266	0.744346	TRUE
CAMK2N1	181.117	-0.145362	0.119177	-1.21971	0.222574	0.523695	TRUE
CAMK2N2	2.01617	0.0352223	0.111044	0.317192	0.751098	0.903223	TRUE
CAMK4	17.3645	-0.104397	0.173858	-0.600471	0.548192	0.796617	TRUE
CAMKK1	71.4278	-0.167382	0.172334	-0.971262	0.331418	0.636422	TRUE
CAMKK2	83.6511	-0.295324	0.141232	-2.09106	0.036523	0.19038	TRUE
CAMKMT	22.887	-0.117208	0.174261	-0.672598	0.501203	0.768143	TRUE
CAMKV	0.558922	-0.029106	0.0621717	-0.468156	0.639673	NA	TRUE
CAMLG	156.266	0.0418732	0.102788	0.407374	0.683733	0.869805	TRUE
CAMP	1.97474	-0.0521412	0.0437019	-1.19311	NA	NA	TRUE
CAMSAP1	970.269	0.0557611	0.07074	0.788254	0.430548	0.721737	TRUE
CAMSAP2	1104.98	-0.0571103	0.0609078	-0.937652	0.348423	0.651016	TRUE
CAMSAP3	3.07226	-0.246505	0.108991	-2.2617	0.0237157	0.14411	TRUE
CAMTA1	1176.8	-0.0562217	0.0766901	-0.733103	0.463496	0.743463	TRUE
CAMTA2	1129.42	0.138547	0.0662367	2.0917	0.0364654	0.190251	TRUE
CAND1	1080.47	-0.0582553	0.0689881	-0.844426	0.398431	0.694956	TRUE
CAND2	2123.18	0.052198	0.0785815	0.664253	0.506528	0.771741	TRUE
CANT1	375.544	-0.0714006	0.0803567	-0.888546	0.374247	0.673523	TRUE
CANX	8731.2	-0.192562	0.047055	-4.09227	4.2717e-05	0.00163621	TRUE
CAP1	1317.89	-0.124407	0.084997	-1.46367	0.143285	0.41726	TRUE
CAP2	2652.8	-0.378187	0.066059	-5.72499	1.03443e-08	1.56158e-06	TRUE
CAPG	476.401	-0.184418	0.136379	-1.35225	0.176297	0.46643	TRUE
CAPN1	364.966	-0.238789	0.108718	-2.1964	0.0280637	0.161966	TRUE
CAPN10	122.242	0.128197	0.111434	1.15042	0.249969	0.555234	TRUE
CAPN11	0.322448	-0.0138295	0.0438014	-0.315732	0.752206	NA	TRUE
CAPN12	30.7998	0.241947	0.174556	1.38607	0.165724	0.450932	TRUE
CAPN13	13.87	-0.198909	0.151892	-1.30954	0.190351	0.482174	TRUE
CAPN15	153.533	0.197347	0.11401	1.73097	0.0834567	0.309065	TRUE
CAPN2	2019.11	-0.0466748	0.0728155	-0.641001	0.521522	0.780408	TRUE
CAPN3	8.64153	-0.332174	0.158031	-2.10196	0.0355567	0.186989	TRUE
CAPN5	127.406	-0.289951	0.127418	-2.2756	0.0228702	0.140806	TRUE
CAPN6	4.20168	-0.119292	0.134221	-0.888776	0.374123	0.673512	TRUE
CAPN7	578.47	-0.104413	0.0660351	-1.58118	0.113837	0.369637	TRUE
CAPN8	0.914279	-0.0151574	0.0757562	-0.200081	0.841417	NA	TRUE
CAPN9	5.60296	-0.169466	0.145365	-1.1658	0.243696	0.548759	TRUE
CAPNS1	711.672	0.112275	0.0719966	1.55945	0.118889	0.379228	TRUE
CAPNS2	0.889269	0.0179582	0.0698405	0.257132	0.797077	NA	TRUE
CAPRIN1	2908.5	-0.117351	0.0470933	-2.49188	0.0127069	0.096623	TRUE
CAPRIN2	232.42	-0.00304287	0.112072	-0.0271511	0.978339	0.994156	TRUE
CAPS2	0.107222	-0.00782843	0.036177	-0.216393	0.828682	NA	TRUE
CAPSL	0	NA	NA	NA	NA	NA	TRUE
CAPZA1	964.577	-0.179252	0.0663997	-2.69959	0.00694254	0.0646238	TRUE
CAPZA2	4706.08	-0.146802	0.055187	-2.66008	0.00781218	0.0695627	TRUE
CAPZA3	0	NA	NA	NA	NA	NA	TRUE
CAPZB	3373.02	0.147617	0.0457333	3.22778	0.00124754	0.0190382	TRUE
CAR11	143.017	0.164961	0.13355	1.2352	0.216755	0.516485	FALSE
CAR12	2.21184	-0.29925	0.11494	-2.60353	0.0092268	0.0771724	FALSE
CAR13	7.55678	-0.218201	0.164111	-1.3296	0.18365	0.474773	FALSE
CAR14	2051.62	0.0301031	0.0789007	0.381532	0.702809	0.880237	FALSE
CAR15	0.213076	0.0124101	0.036177	0.343038	0.73157	NA	FALSE
CAR2	358.629	-0.550039	0.132599	-4.14814	3.3519e-05	0.0013508	FALSE
CAR3	28.6518	-0.736423	0.170607	-4.3165	1.58525e-05	0.000741935	FALSE
CAR4	413.234	0.101286	0.167991	0.602924	0.546559	0.795667	FALSE
CAR5A	2.99837	-0.140763	0.128403	-1.09626	0.272965	0.579173	FALSE
CAR5B	55.7163	-0.344953	0.175053	-1.97057	0.0487732	0.225056	FALSE
CAR6	18.1565	0.445828	0.165219	2.69841	0.00696725	0.0647446	FALSE
CAR7	0.339021	0.0279187	0.0441576	0.632252	0.527222	NA	FALSE
CAR8	117.391	-0.22068	0.158516	-1.39216	0.163873	0.449106	FALSE
CAR9	5.01867	0.0849309	0.144199	0.588982	0.555873	0.802187	FALSE
CARD10	549.646	0.0647485	0.0831711	0.778497	0.436276	0.725854	TRUE
CARD14	19.5441	0.0197412	0.174987	0.112815	0.910177	0.971724	TRUE
CARD6	893.642	-0.138782	0.0876937	-1.58257	0.113518	0.369154	TRUE
CARD9	723.286	0.100496	0.164341	0.611513	0.54086	0.793007	TRUE
CARF	130.246	0.170687	0.126486	1.34946	0.177189	0.467344	TRUE
CARHSP1	1577.21	0.0631492	0.0913954	0.690945	0.4896	0.76104	TRUE
CARKD	264.32	-0.0659791	0.107102	-0.61604	0.537868	0.791333	TRUE
CARM1	836.498	0.000786367	0.06777	0.0116035	0.990742	0.997494	TRUE
CARNS1	476.583	0.4823	0.0864876	5.57652	2.45378e-08	3.25718e-06	TRUE
CARS	391.614	0.12003	0.0927207	1.29453	0.195482	0.489833	TRUE
CARS2	457.113	0.0983201	0.0766127	1.28334	0.199373	0.494753	TRUE
CARTPT	0	NA	NA	NA	NA	NA	TRUE
CASC1	37.2271	0.330349	0.161918	2.04023	0.0413278	0.204685	TRUE
CASC3	457.898	-0.0963236	0.0890513	-1.08166	0.279401	0.585111	TRUE
CASC4	146.167	0.000706884	0.153542	0.00460386	0.996327	0.998568	TRUE
CASC5	9.97789	0.031336	0.160665	0.195039	0.845363	0.943527	TRUE
CASK	72.7353	0.175819	0.145632	1.20728	0.227324	0.527953	TRUE
CASKIN1	47.7387	0.517993	0.160396	3.22946	0.00124023	0.0189642	TRUE
CASKIN2	1154.07	0.252041	0.0774662	3.25356	0.00113969	0.0178569	TRUE
CASP1	118.748	-0.257734	0.155652	-1.65583	0.0977556	0.338561	TRUE
CASP12	126.259	-0.243072	0.139859	-1.73797	0.0822153	0.3066	TRUE
CASP14	0.107222	-0.00782843	0.036177	-0.216393	0.828682	NA	TRUE
CASP2	321.342	0.105072	0.0898775	1.16906	0.242381	0.54676	TRUE
CASP3	122.521	-0.201211	0.140915	-1.42789	0.153324	0.433426	TRUE
CASP4	100.166	-0.140044	0.14402	-0.972389	0.330857	0.635943	FALSE
CASP6	58.8499	0.0166132	0.164268	0.101135	0.919444	0.975713	TRUE
CASP7	673.922	0.0220894	0.117171	0.188522	0.850467	0.945728	TRUE
CASP8	98.0514	-0.0115134	0.12855	-0.0895639	0.928634	0.979592	TRUE
CASP8AP2	254.455	-0.0541949	0.0922349	-0.587575	0.556818	0.802628	TRUE
CASP9	201.278	0.0473501	0.106409	0.444982	0.656332	0.854937	TRUE
CASQ1	928.002	-0.0492387	0.173918	-0.283115	0.777089	0.914657	TRUE
CASQ2	27881.4	-0.203607	0.109026	-1.86751	0.061831	0.260533	FALSE
CASR	0	NA	NA	NA	NA	NA	TRUE
CASS4	14.6267	-0.350908	0.174941	-2.00587	0.0448704	0.214545	FALSE
CAST	2166.16	0.0109944	0.0741667	0.148239	0.882154	0.959475	TRUE
CASZ1	1321.49	-0.0137213	0.0767676	-0.178739	0.858143	0.949259	TRUE
CAT	7903.51	0.0228037	0.0551694	0.41334	0.679358	0.867608	TRUE
CATSPER1	0	NA	NA	NA	NA	NA	FALSE
CATSPER2	42.1232	-0.157939	0.164775	-0.958513	0.337804	0.640974	TRUE
CATSPER3	0.109164	0.00618284	0.036177	0.170906	0.864298	NA	FALSE
CATSPER4	4.90779	0.185808	0.142967	1.29966	0.193717	0.487155	TRUE
CATSPERD	8.12297	0.0591004	0.160236	0.368833	0.712252	0.885099	TRUE
CATSPERG1	13.0257	-0.0983915	0.170222	-0.578019	0.563251	0.806666	FALSE
CAV1	7618.6	-0.0716817	0.0521094	-1.3756	0.168945	0.45575	TRUE
CAV2	2172.47	0.0727992	0.0736296	0.988723	0.322799	0.627705	TRUE
CAV3	2179.19	0.12908	0.0436238	2.95892	0.00308716	0.0362572	TRUE
CBFA2T2	711.873	-0.0300203	0.0755363	-0.397429	0.691051	0.874067	TRUE
CBFA2T3	780.282	0.0145193	0.0655097	0.221636	0.824597	0.935609	TRUE
CBFB	578.098	-0.359742	0.106792	-3.36861	0.000755473	0.0134483	TRUE
CBL	602.359	-0.0410085	0.0862933	-0.475222	0.634629	0.844789	TRUE
CBLB	455.726	-0.033677	0.0901739	-0.373467	0.708801	0.883032	TRUE
CBLC	67.491	0.305594	0.167937	1.81969	0.0688063	0.277423	TRUE
CBLL1	318.56	0.0307224	0.098519	0.311842	0.75516	0.904552	TRUE
CBLN1	0	NA	NA	NA	NA	NA	TRUE
CBLN2	1.42306	-0.170934	0.0902073	-1.8949	0.0581054	NA	TRUE
CBLN3	2.45547	0.0678052	0.123122	0.550715	0.581829	0.816832	TRUE
CBLN4	0	NA	NA	NA	NA	NA	TRUE
CBR1	45.5212	-0.337054	0.170479	-1.9771	0.0480302	0.223165	TRUE
CBR3	60.4392	-0.307255	0.15741	-1.95194	0.050945	0.231812	TRUE
CBR4	592.948	0.14771	0.109386	1.35036	0.1769	0.467234	TRUE
CBS	59.8724	0.0988032	0.164141	0.601943	0.547212	0.795879	TRUE
CBWD1	128.115	-0.130107	0.123969	-1.04951	0.293942	0.598809	FALSE
CBX1	527.077	0.0783954	0.0778031	1.00761	0.313641	0.61936	TRUE
CBX2	34.5541	0.140115	0.163257	0.858247	0.390756	0.689048	TRUE
CBX3	911.861	-0.0290005	0.0867893	-0.334148	0.738268	0.897509	TRUE
CBX4	81.6192	0.00340795	0.140575	0.0242429	0.980659	0.994555	TRUE
CBX5	337.392	-0.103186	0.104899	-0.983669	0.325278	0.630731	TRUE
CBX6	1088.5	0.106719	0.0769219	1.38736	0.165331	0.450657	TRUE
CBX7	694.797	-0.0731177	0.0744767	-0.981754	0.326221	0.631764	TRUE
CBX8	64.9005	0.323959	0.144161	2.2472	0.0246272	0.147495	TRUE
CBY1	390.428	0.072569	0.080341	0.903263	0.366386	0.667119	TRUE
CBY3	8.17878	0.0239849	0.16641	0.144131	0.885397	0.961362	TRUE
CC2D1A	271.158	0.11308	0.0974218	1.16073	0.245752	0.550252	TRUE
CC2D1B	581.972	0.210937	0.0742795	2.83978	0.00451447	0.0469688	TRUE
CC2D2A	293.58	0.115877	0.109589	1.05737	0.290341	0.595671	TRUE
CC2D2B	0.224014	-0.0016012	0.036177	-0.0442602	0.964697	NA	FALSE
CCAR1	428.327	0.0552808	0.0864644	0.639348	0.522597	0.78121	TRUE
CCAR2	859.661	0.124399	0.0587126	2.11878	0.0341094	0.18243	FALSE
CCBE1	59.7106	-0.0445697	0.161076	-0.2767	0.78201	0.916261	TRUE
CCBL1	587.664	-0.157073	0.112633	-1.39455	0.16315	0.448045	TRUE
CCDC101	175.588	0.186195	0.112649	1.65288	0.0983553	0.340179	TRUE
CCDC102A	168.255	0.465031	0.127498	3.64736	0.000264948	0.00637448	TRUE
CCDC103	0	NA	NA	NA	NA	NA	TRUE
CCDC104	836.072	-0.163115	0.0833148	-1.95782	0.0502517	0.229403	TRUE
CCDC105	0	NA	NA	NA	NA	NA	TRUE
CCDC106	93.0538	-0.158842	0.159481	-0.995994	0.319253	0.624553	TRUE
CCDC107	304.882	0.0392477	0.0973937	0.40298	0.686963	0.871682	TRUE
CCDC109B	12.4617	-0.49057	0.170266	-2.8812	0.00396169	0.0430806	TRUE
CCDC11	27.886	-0.0609502	0.172028	-0.354304	0.723111	0.890187	TRUE
CCDC110	0	NA	NA	NA	NA	NA	TRUE
CCDC111	40.2269	-0.11588	0.166512	-0.695925	0.486476	0.759558	TRUE
CCDC112	87.5062	-0.0230516	0.128682	-0.179136	0.857831	0.94918	TRUE
CCDC113	0.668476	0.0272253	0.0703272	0.387123	0.698665	NA	TRUE
CCDC114	1.2227	-0.122215	0.0917773	-1.33164	0.182978	NA	TRUE
CCDC115	119.396	0.0713341	0.114316	0.624008	0.532622	0.788796	TRUE
CCDC116	0.217776	0.0124101	0.036177	0.343038	0.73157	NA	TRUE
CCDC117	374.291	0.0109403	0.121228	0.0902454	0.928092	0.97941	TRUE
CCDC12	380.485	0.216564	0.0883167	2.45213	0.0142014	0.103441	TRUE
CCDC120	15.596	0.0329424	0.175004	0.188238	0.85069	0.94576	TRUE
CCDC121	0	NA	NA	NA	NA	NA	TRUE
CCDC122	49.3687	0.174868	0.174985	0.99933	0.317635	0.623053	TRUE
CCDC124	695.477	0.107949	0.0649965	1.66084	0.096745	0.336826	TRUE
CCDC125	138.658	0.112776	0.115576	0.975778	0.329174	0.63453	TRUE
CCDC126	236.351	-0.19007	0.102386	-1.85641	0.0633947	0.264827	TRUE
CCDC127	929.161	-0.159319	0.0700232	-2.27524	0.0228917	0.140882	TRUE
CCDC129	0	NA	NA	NA	NA	NA	TRUE
CCDC13	0.576566	0.00711928	0.0559729	0.127191	0.898789	NA	TRUE
CCDC130	118.878	0.159942	0.117439	1.36191	0.173226	0.462315	TRUE
CCDC132	211.71	-0.172405	0.107848	-1.59859	0.109911	0.361895	TRUE
CCDC134	68.7626	0.0354022	0.147841	0.239461	0.810748	0.928763	TRUE
CCDC135	0.21376	-0.0016012	0.036177	-0.0442602	0.964697	NA	TRUE
CCDC136	129.591	-0.0339364	0.135633	-0.250208	0.802427	0.926081	TRUE
CCDC137	251.69	0.237166	0.102416	2.31572	0.0205737	0.131723	TRUE
CCDC138	13.8407	0.158631	0.174183	0.910713	0.362446	0.663898	TRUE
CCDC14	85.8334	-0.0618484	0.131225	-0.471315	0.637416	0.846039	TRUE
CCDC141	5204.58	-0.0503204	0.0880339	-0.571603	0.567591	0.808739	TRUE
CCDC142	166.015	0.249538	0.109768	2.27332	0.0230067	0.141379	TRUE
CCDC144B	4.85341	0.21582	0.135184	1.59649	0.11038	0.36309	FALSE
CCDC146	15.4044	0.223065	0.175048	1.27431	0.202554	0.499348	TRUE
CCDC147	0	NA	NA	NA	NA	NA	TRUE
CCDC148	1.4127	0.0199843	0.0837004	0.23876	0.811291	NA	TRUE
CCDC149	417.729	0.122993	0.0842207	1.46037	0.144189	0.419138	TRUE
CCDC15	60.1518	0.231471	0.161068	1.4371	0.15069	0.42975	TRUE
CCDC150	3.79119	0.00517025	0.138471	0.0373381	0.970215	0.99142	TRUE
CCDC151	7.71267	-0.0554106	0.151369	-0.366063	0.714318	0.885736	TRUE
CCDC152	14.8804	-0.00815806	0.174577	-0.0467304	0.962728	0.988732	TRUE
CCDC153	2.14582	-0.0134448	0.0982251	-0.136878	0.891127	0.963323	TRUE
CCDC154	0.21591	-0.0156125	0.036177	-0.431558	0.666062	NA	FALSE
CCDC155	9.14151	0.205594	0.164939	1.24649	0.212586	0.511149	TRUE
CCDC157	69.7211	0.086435	0.153162	0.564339	0.572524	0.811759	TRUE
CCDC158	70.8433	0.384852	0.156683	2.45624	0.0140398	0.102847	TRUE
CCDC159	55.6463	0.0301273	0.150098	0.200717	0.84092	0.941746	TRUE
CCDC160	1.91261	0.0216014	0.107644	0.200674	0.840954	0.941746	TRUE
CCDC163	67.5482	0.0321722	0.155621	0.206734	0.836218	0.939379	FALSE
CCDC166	0	NA	NA	NA	NA	NA	TRUE
CCDC167	90.3496	0.186625	0.125918	1.48211	0.138311	0.41122	TRUE
CCDC169	0	NA	NA	NA	NA	NA	TRUE
CCDC17	123.481	0.2314	0.125828	1.83902	0.0659128	0.270575	TRUE
CCDC170	5.41074	-0.0902247	0.149462	-0.603663	0.546068	0.795523	TRUE
CCDC172	0	NA	NA	NA	NA	NA	TRUE
CCDC173	0.772532	0.0022866	0.0590928	0.0386951	0.969133	NA	TRUE
CCDC174	165.371	0.00429455	0.105069	0.0408735	0.967397	0.990012	TRUE
CCDC175	16.139	-0.18227	0.175064	-1.04116	0.297799	0.602873	TRUE
CCDC176	64.2582	0.181722	0.159622	1.13845	0.254931	0.559497	TRUE
CCDC177	7.8779	-0.252357	0.163607	-1.54246	0.122962	0.3853	FALSE
CCDC178	0	NA	NA	NA	NA	NA	FALSE
CCDC179	0	NA	NA	NA	NA	NA	TRUE
CCDC18	15.9417	0.203228	0.175064	1.16088	0.245692	0.550199	TRUE
CCDC180	2.65143	0.0729839	0.111898	0.652237	0.514248	0.776237	TRUE
CCDC181	121.852	-0.218301	0.165591	-1.31831	0.187399	0.478945	TRUE
CCDC182	0	NA	NA	NA	NA	NA	FALSE
CCDC183	0	NA	NA	NA	NA	NA	FALSE
CCDC184	0.907566	-0.0151121	0.0757507	-0.199498	0.841873	NA	FALSE
CCDC19	36.7242	-0.0424437	0.173272	-0.244954	0.806492	0.927621	TRUE
CCDC22	235.802	0.172521	0.100776	1.71192	0.0869115	0.316823	TRUE
CCDC23	82.7522	-0.0434766	0.130198	-0.333926	0.738435	0.897546	TRUE
CCDC24	0.552455	0.0069153	0.0556075	0.124359	0.901031	NA	TRUE
CCDC25	561.394	-0.175782	0.0849531	-2.06917	0.0385304	0.19678	FALSE
CCDC27	0.560098	0.00809958	0.0556727	0.145486	0.884327	NA	FALSE
CCDC28A	320.653	0.0246652	0.0877217	0.281176	0.778576	0.915369	TRUE
CCDC28B	85.6151	0.13592	0.153231	0.887029	0.375063	0.674518	TRUE
CCDC3	101.241	-0.375565	0.141498	-2.6542	0.0079497	0.0701889	TRUE
CCDC30	5.94548	-0.193001	0.15195	-1.27017	0.204025	0.500571	TRUE
CCDC32	437.316	-0.0675894	0.0821822	-0.822434	0.41083	0.705595	FALSE
CCDC33	0	NA	NA	NA	NA	NA	TRUE
CCDC34	41.0301	-0.0903004	0.158699	-0.569003	0.569354	0.809789	TRUE
CCDC36	1.12195	-0.0181006	0.0810769	-0.223253	0.823339	NA	TRUE
CCDC37	5.06035	-0.109358	0.149378	-0.732089	0.464114	0.74424	TRUE
CCDC38	0.116161	-0.00782843	0.036177	-0.216393	0.828682	NA	TRUE
CCDC39	68.3282	0.148054	0.140529	1.05355	0.292091	0.597293	TRUE
CCDC40	1.52654	0.00578645	0.0947228	0.0610883	0.951289	NA	TRUE
CCDC41	292.457	0.158581	0.0972855	1.63006	0.10309	0.348908	TRUE
CCDC42	0.107222	-0.00782843	0.036177	-0.216393	0.828682	NA	TRUE
CCDC42B	2.18395	-0.00584758	0.101604	-0.0575524	0.954105	0.986921	TRUE
CCDC43	681.422	-0.104213	0.0831327	-1.25358	0.209996	0.508016	TRUE
[truncated: 21,481 more rows]

## Sheet: S6 DEG analysis rat kidney
Table S6. Result of DESeq2-analysis for differentially expressed genes during aging in rat kidney.
	baseMean	log2FoldChange	lfcSE	stat	pvalue	padj	ortholog_in_the_other_species
A1BG	0	NA	NA	NA	NA	NA	TRUE
A1CF	929.853	0.724062	0.284408	2.54586	0.0109009	0.0393906	TRUE
A1I3	4.08738	0.521096	0.453327	1.14949	0.250352	0.398838	FALSE
A26C2	0	NA	NA	NA	NA	NA	FALSE
A2M	0	NA	NA	NA	NA	NA	TRUE
A3GALT2	313.146	-1.06998	0.344937	-3.10195	0.00192252	0.0105871	FALSE
A4GALT	761.719	0.298319	0.389357	0.766183	0.443567	0.594629	TRUE
A4GNT	0.33104	-0.10882	0.301931	-0.360413	0.718538	NA	TRUE
AAAS	282.753	0.042062	0.102443	0.410589	0.681374	0.79344	TRUE
AACS	213.284	-0.821014	0.296994	-2.76442	0.00570247	0.024343	TRUE
AADAC	230.301	1.43614	0.398836	3.60083	0.000317206	0.00272752	TRUE
AADACL2	0	NA	NA	NA	NA	NA	TRUE
AADACL3	0	NA	NA	NA	NA	NA	FALSE
AADACL4	0.218221	0.0785668	0.260855	0.301189	0.76327	NA	TRUE
AADAT	33739.1	0.240004	0.378432	0.634206	0.525946	0.66748	TRUE
AAED1	1867.82	0.0669351	0.116556	0.574276	0.565781	0.702518	TRUE
AAGAB	1844.17	0.0188361	0.0989281	0.190402	0.848994	0.90991	TRUE
AAK1	338.115	0.608059	0.224527	2.70818	0.00676539	0.0277302	TRUE
AAMDC	266.44	0.108937	0.144517	0.753802	0.450968	0.601493	TRUE
AAMP	4369.01	0.270553	0.0846889	3.19467	0.00139991	0.00832008	TRUE
AANAT	1.32707	0.338252	0.452909	0.746843	0.455158	0.605216	TRUE
AAR2	1302.7	0.0564308	0.0988555	0.570841	0.568107	0.704717	TRUE
AARD	5.88358	-0.299214	0.473975	-0.631286	0.527853	0.669394	TRUE
AARS	5275.27	0.67951	0.153575	4.4246	9.66211e-06	0.000187595	TRUE
AARS2	361.86	0.239424	0.132812	1.80273	0.07143	0.161336	TRUE
AARSD1	977.601	0.140125	0.124199	1.12822	0.259225	0.408618	TRUE
AASDH	275.202	0.0204752	0.113146	0.180962	0.856397	0.91465	TRUE
AASDHPPT	735.252	0.270783	0.123478	2.19296	0.02831	0.0811418	TRUE
AASS	12096.4	0.742415	0.313587	2.36749	0.0179092	0.0576668	TRUE
AATF	360.868	0.163504	0.136881	1.1945	0.232283	0.378812	TRUE
AATK	83.3027	-0.0400517	0.213194	-0.187865	0.850983	0.911115	TRUE
ABAT	5143.11	0.599172	0.30955	1.93562	0.0529138	0.129684	TRUE
ABCA1	335.252	-0.926172	0.244651	-3.78569	0.000153285	0.00160105	TRUE
ABCA12	1.21561	0.118362	0.463723	0.255242	0.798536	0.877556	TRUE
ABCA13	1.23414	-0.563125	0.437725	-1.28648	0.198275	0.338699	TRUE
ABCA14	6.2911	-0.102916	0.464929	-0.221359	0.824813	0.894512	FALSE
ABCA15	17.7639	0.828521	0.480653	1.72374	0.0847549	0.182658	FALSE
ABCA16	135.811	0.377462	0.300715	1.25522	0.2094	0.351775	FALSE
ABCA17	4.91225	-0.271828	0.468149	-0.580644	0.56148	0.698958	FALSE
ABCA2	8792.07	0.789001	0.157993	4.99389	5.91739e-07	2.16416e-05	TRUE
ABCA3	5076.14	0.75191	0.164614	4.56772	4.93065e-06	0.000112162	TRUE
ABCA4	647.649	-0.257391	0.346831	-0.742121	0.458014	0.607482	TRUE
ABCA5	126.868	-0.196534	0.196849	-0.9984	0.318085	0.471458	TRUE
ABCA6	2.53371	-0.611126	0.452774	-1.34974	0.1771	0.312449	TRUE
ABCA7	1214.52	0.0205997	0.115726	0.178004	0.85872	0.915914	TRUE
ABCA8	79.0721	-1.11954	0.308397	-3.63018	0.000283226	0.00252673	FALSE
ABCA8A	1265.53	-1.23249	0.284995	-4.3246	1.52812e-05	0.000270085	FALSE
ABCA9	180.611	-0.85856	0.32163	-2.6694	0.00759861	0.0303055	TRUE
ABCB10	676.324	-0.173232	0.239569	-0.723098	0.46962	0.617057	TRUE
ABCB11	72.5809	0.852882	0.337098	2.53007	0.0114039	0.0408591	TRUE
ABCB1A	531.515	1.12296	0.299896	3.74451	0.000180747	0.00181814	FALSE
ABCB1B	191.684	-2.30377	0.420991	-5.47226	4.44331e-08	2.48969e-06	FALSE
ABCB4	90.8586	-0.323008	0.253641	-1.27349	0.202845	0.344138	TRUE
ABCB5	0.695297	-0.0934637	0.407768	-0.229208	0.818707	NA	TRUE
ABCB6	1582.75	0.520205	0.144133	3.60919	0.000307155	0.00266828	TRUE
ABCB7	666.638	0.607291	0.159743	3.80168	0.000143721	0.0015265	TRUE
ABCB8	1314.95	0.213443	0.0930709	2.29334	0.0218283	0.0670134	TRUE
ABCB9	194.027	0.529717	0.155225	3.41259	0.000643489	0.0046357	TRUE
ABCC1	583.199	-0.198818	0.265581	-0.748615	0.454089	0.603985	TRUE
ABCC10	322.011	0.202264	0.141905	1.42535	0.154057	0.282797	TRUE
ABCC12	21.8645	2.85961	0.390294	7.3268	2.35715e-13	6.8597e-11	TRUE
ABCC2	742.115	0.993104	0.210995	4.70676	2.51682e-06	6.58626e-05	TRUE
ABCC3	371.685	-0.192812	0.144616	-1.33326	0.182445	0.319152	TRUE
ABCC4	1496.6	0.703861	0.20791	3.38541	0.000710724	0.00498495	TRUE
ABCC5	516.297	-1.08512	0.331555	-3.27283	0.00106478	0.00680259	TRUE
ABCC6	820.244	0.518188	0.190605	2.71865	0.00655497	0.0270782	TRUE
ABCC8	101.438	0.88205	0.375912	2.34642	0.0189545	0.0602623	TRUE
ABCC9	663.745	-1.16728	0.270461	-4.31588	1.5897e-05	0.000277483	TRUE
ABCD1	367.949	-0.0573993	0.116481	-0.492776	0.622171	0.750491	TRUE
ABCD2	19.4059	-0.623296	0.36148	-1.72429	0.0846554	0.182513	TRUE
ABCD3	5375.9	0.865634	0.188725	4.58675	4.50192e-06	0.000104523	TRUE
ABCD4	370.552	0.500083	0.229789	2.17627	0.0295348	0.0836439	TRUE
ABCE1	2077.77	0.156838	0.0923813	1.69772	0.0895607	0.190438	TRUE
ABCF1	2199.35	0.068677	0.077695	0.883931	0.376734	0.531441	TRUE
ABCF2	1697.5	0.1666	0.0569195	2.92695	0.00342308	0.0165194	TRUE
ABCF3	1700.07	0.121461	0.0989755	1.22718	0.219755	0.364611	TRUE
ABCG1	695.624	-1.07523	0.376023	-2.85948	0.00424338	0.0194683	TRUE
ABCG2	4702.04	0.910983	0.245745	3.70702	0.000209711	0.00204136	TRUE
ABCG3	49.4902	-0.24183	0.211795	-1.14181	0.253532	0.402272	FALSE
ABCG3L1	232.135	0.74686	0.150129	4.97478	6.53222e-07	2.31633e-05	FALSE
ABCG3L2	59.9204	0.104132	0.2387	0.436247	0.662657	0.780137	FALSE
ABCG3L3	507.049	0.302819	0.242545	1.2485	0.211846	0.354878	FALSE
ABCG3L4	168.059	-0.405835	0.212388	-1.91082	0.0560281	0.134926	FALSE
ABCG4	33.0073	-0.332404	0.310398	-1.0709	0.284215	0.435719	TRUE
ABCG5	2.04439	-0.842393	0.474637	-1.77481	0.0759287	0.168367	TRUE
ABCG8	0.300615	-0.0785891	0.260855	-0.301275	0.763205	NA	TRUE
ABHD1	715.958	0.621023	0.123923	5.01134	5.4051e-07	2.04014e-05	TRUE
ABHD10	186.295	0.27236	0.121868	2.23488	0.0254254	0.0749092	TRUE
ABHD11	752.77	0.317145	0.182857	1.73439	0.082849	0.179421	TRUE
ABHD12	937.735	-0.107947	0.147754	-0.730584	0.465033	0.61298	TRUE
ABHD12B	0	NA	NA	NA	NA	NA	TRUE
ABHD13	881.178	0.107305	0.101001	1.06241	0.288047	0.440243	TRUE
ABHD14A	1904.76	0.474756	0.252977	1.87668	0.0605624	0.14313	TRUE
ABHD14B	7608.99	0.368711	0.213523	1.7268	0.0842044	0.18175	TRUE
ABHD15	30.9812	-0.828659	0.28936	-2.86377	0.00418637	0.0192802	TRUE
ABHD16A	1815.5	0.331623	0.0844137	3.92854	8.54616e-05	0.00102362	TRUE
ABHD16B	3.80548	0.228179	0.475913	0.479454	0.631615	0.757056	TRUE
ABHD17A	2774.07	0.445829	0.126983	3.51093	0.000446538	0.00353357	TRUE
ABHD17B	554.951	-0.0638767	0.0809024	-0.789552	0.429789	0.582454	TRUE
ABHD17C	5478.49	0.578428	0.270951	2.13481	0.0327765	0.0901493	TRUE
ABHD2	529.768	-0.0965336	0.296466	-0.325614	0.744716	0.838787	TRUE
ABHD3	346.388	0.559223	0.216177	2.58687	0.00968509	0.036135	TRUE
ABHD4	2851.44	-0.208307	0.133841	-1.55638	0.119618	0.235896	TRUE
ABHD5	718.222	0.00583999	0.119678	0.0487974	0.961081	0.977112	TRUE
ABHD6	1093.02	0.0517101	0.111866	0.462251	0.643902	0.76522	TRUE
ABHD8	582.781	-0.141793	0.116278	-1.21943	0.222681	0.36842	TRUE
ABI1	1175.57	-0.0430629	0.086333	-0.4988	0.61792	0.747075	TRUE
ABI2	469.516	0.170625	0.147472	1.157	0.247272	0.39535	TRUE
ABI3	229.001	-0.630249	0.197602	-3.18949	0.00142523	0.00842902	TRUE
ABI3BP	108.052	-0.769658	0.193336	-3.98093	6.86466e-05	0.000864692	TRUE
ABL1	160.658	0.406143	0.162464	2.4999	0.0124229	0.0437301	TRUE
ABL2	635.06	0.187779	0.149943	1.25234	0.210446	0.352953	TRUE
ABLIM1	4099.97	0.179308	0.109783	1.63329	0.102407	0.210207	TRUE
ABLIM2	81.4533	-0.218667	0.262493	-0.833039	0.404823	0.5588	TRUE
ABLIM3	2543.75	0.431329	0.262999	1.64004	0.100997	0.208096	TRUE
ABO	69.1772	-0.675572	0.298043	-2.2667	0.0234089	0.0706704	FALSE
ABO2	0.588135	-0.0886681	0.373202	-0.237587	0.812201	NA	FALSE
ABOL1	0.205678	0.0785668	0.260855	0.301189	0.76327	NA	FALSE
ABR	730.407	-0.628782	0.215242	-2.92128	0.00348597	0.0167532	TRUE
ABRA	5.76204	-0.478404	0.474991	-1.00719	0.313845	0.467224	TRUE
ABRACL	678.764	0.255212	0.178667	1.42842	0.15317	0.281844	TRUE
ABT1	448.13	0.150444	0.137472	1.09436	0.273799	0.424337	TRUE
ABTB1	658.387	0.179002	0.0967091	1.85094	0.0641789	0.149397	TRUE
ABTB2	791.015	0.735017	0.315562	2.32923	0.0198468	0.0623462	TRUE
AC1576	183.834	0.0728555	0.281147	0.259136	0.79553	0.875193	FALSE
ACAA1A	2202.5	0.705594	0.234587	3.00782	0.00263133	0.0134753	FALSE
ACAA1B	2018.17	1.04348	0.393398	2.65248	0.0079904	0.0314089	FALSE
ACAA2	9204.79	0.784003	0.365696	2.14386	0.0320438	0.0887977	TRUE
ACACA	452.127	0.0412646	0.208745	0.19768	0.843296	0.906949	TRUE
ACACB	551.47	-0.674321	0.309556	-2.17835	0.0293801	0.0833737	TRUE
ACAD10	5248.9	0.801598	0.266632	3.00638	0.00264379	0.0135308	TRUE
ACAD11	2089.28	0.519939	0.176038	2.95355	0.0031414	0.0154548	TRUE
ACAD8	2120.81	0.294856	0.17361	1.69838	0.089436	0.19035	TRUE
ACAD9	1309.04	0.357713	0.131274	2.72493	0.0064315	0.0267185	TRUE
ACADL	5613.51	0.489022	0.167404	2.9212	0.00348682	0.0167532	TRUE
ACADM	12252.1	0.53574	0.158189	3.3867	0.000707391	0.00496881	TRUE
ACADS	2693.23	0.335597	0.205373	1.63409	0.102241	0.209942	TRUE
ACADSB	2060.12	1.0097	0.276325	3.65403	0.000258152	0.00236967	TRUE
ACADVL	5303.84	0.522276	0.159476	3.27496	0.00105677	0.00675962	TRUE
ACAN	7.41468	0.145981	0.457703	0.318943	0.749769	0.842119	FALSE
ACAP1	160.461	-1.67714	0.318829	-5.26031	1.43813e-07	6.91571e-06	TRUE
ACAP2	1294.68	0.0632715	0.12853	0.49227	0.622529	0.750869	TRUE
ACAP3	471.53	0.132239	0.105308	1.25573	0.209213	0.351584	TRUE
ACAT1	16529.1	0.706493	0.221267	3.19294	0.00140832	0.00835832	TRUE
ACAT2	860.406	0.352416	0.1202	2.9319	0.0033689	0.016312	TRUE
ACBD3	1218.38	-0.0674451	0.0893736	-0.754642	0.450464	0.601058	TRUE
ACBD4	2157.93	0.713696	0.256906	2.77804	0.00546877	0.0235906	TRUE
ACBD5	954.912	0.217646	0.163228	1.33339	0.182405	0.319115	TRUE
ACBD6	225.592	0.170673	0.135327	1.26119	0.20724	0.349256	TRUE
ACBD7	169.813	0.199739	0.126929	1.57362	0.115574	0.229828	FALSE
ACCS	172.155	-0.39249	0.177673	-2.20905	0.027171	0.0786383	TRUE
ACCSL	2.32636	-0.429333	0.483429	-0.8881	0.374487	0.529217	TRUE
ACD	672.62	0.349054	0.128682	2.71254	0.00667701	0.0274779	TRUE
ACE	460.215	-1.45981	0.35067	-4.16292	3.14204e-05	0.000470582	TRUE
ACE2	448.9	0.601758	0.363071	1.65741	0.0974366	0.202682	TRUE
ACE3	0.910892	-0.630109	0.454083	-1.38765	0.165243	NA	FALSE
ACER1	1.77452	-0.0343845	0.486369	-0.0706963	0.943639	0.966721	TRUE
ACER2	2719.37	-0.411585	0.103823	-3.9643	7.36116e-05	0.000912924	TRUE
ACER3	470.47	-0.0564727	0.148374	-0.380611	0.703492	0.811027	TRUE
ACHE	39.1542	-0.01902	0.223504	-0.0850992	0.932183	0.959994	TRUE
ACIN1	2878.03	-0.0632343	0.060391	-1.04708	0.295062	0.447753	TRUE
ACKR2	3.06458	-0.558025	0.479722	-1.16322	0.244739	0.392489	TRUE
ACKR4	19.0729	-0.0355583	0.385381	-0.0922681	0.926485	0.956804	TRUE
ACLY	2939.73	0.431027	0.0960337	4.48829	7.17982e-06	0.000150731	TRUE
ACMSD	5453.54	0.800747	0.382738	2.09216	0.0364246	0.097527	TRUE
ACN9	154.209	0.537977	0.197474	2.72429	0.00644406	0.0267509	TRUE
ACNAT1	1.50321	0.447604	0.469839	0.952676	0.340754	0.495826	FALSE
ACNAT2	1.21445	0.163382	0.451143	0.362151	0.717239	0.820375	FALSE
ACO1	7991.34	0.439917	0.198853	2.21227	0.0269478	0.0781129	TRUE
ACO2	27689	0.515638	0.159876	3.22525	0.00125865	0.00769458	TRUE
ACOT1	857.773	0.487423	0.254694	1.91376	0.0556507	0.134343	FALSE
ACOT11	119.462	0.295718	0.284244	1.04037	0.298169	0.45096	TRUE
ACOT12	303.012	0.803118	0.484629	1.65718	0.0974831	0.202712	TRUE
ACOT13	573.227	0.0481501	0.179846	0.26773	0.788907	0.869927	TRUE
ACOT2	811.545	0.560805	0.21751	2.57829	0.00992907	0.036777	TRUE
ACOT3	871.46	0.038883	0.240818	0.161463	0.871729	0.924792	FALSE
ACOT4	968.862	0.661357	0.34744	1.90351	0.0569734	0.136774	TRUE
ACOT5	125.824	0.624312	0.465625	1.3408	0.179984	0.316124	FALSE
ACOT6	9.08863	1.08961	0.448078	2.43175	0.0150259	0.0503719	FALSE
ACOT7	289.852	0.17336	0.178721	0.970005	0.332044	0.486846	FALSE
ACOT8	782.263	0.569639	0.114533	4.97359	6.57247e-07	2.32572e-05	TRUE
ACOT9	964.632	-0.264395	0.189485	-1.39533	0.162916	0.293756	TRUE
ACOX1	8177.69	0.90197	0.222089	4.0613	4.88001e-05	0.000664271	TRUE
ACOX2	221.025	0.14751	0.332747	0.443309	0.657542	0.776401	TRUE
ACOX3	970.128	0.75523	0.132504	5.69969	1.20027e-08	8.26914e-07	TRUE
ACOXL	3.89183	-0.349714	0.486868	-0.718293	0.472576	0.619688	TRUE
ACP1	276.865	0.645553	0.17917	3.60302	0.000314535	0.00271562	TRUE
ACP2	2129.41	0.47764	0.128324	3.72215	0.000197533	0.0019498	TRUE
ACP5	2056.06	0.442739	0.181267	2.44247	0.0145872	0.0492929	TRUE
ACP6	396.288	0.218109	0.127007	1.71731	0.0859231	0.184516	TRUE
ACPL2	636.681	0.155665	0.0961154	1.61956	0.105326	0.214788	TRUE
ACPP	275.289	-0.170039	0.343495	-0.495026	0.620582	0.749271	TRUE
ACPT	6.3061	-0.376189	0.452363	-0.831609	0.40563	0.559593	FALSE
ACR	3.78296	0.164427	0.48653	0.337959	0.735394	0.833483	TRUE
ACRBP	72.7543	-0.48967	0.326112	-1.50154	0.133216	0.255298	TRUE
ACRV1	0	NA	NA	NA	NA	NA	TRUE
ACSBG1	13.6484	-1.24962	0.483126	-2.58653	0.00969489	0.0361571	TRUE
ACSBG2	0	NA	NA	NA	NA	NA	FALSE
ACSF2	2343.45	1.05262	0.34437	3.05664	0.00223834	0.011892	TRUE
ACSF3	2291.91	0.422858	0.148151	2.85424	0.00431398	0.0197546	TRUE
ACSL1	5374.4	0.0703125	0.181238	0.387957	0.698048	0.806458	TRUE
ACSL3	1373.15	0.336954	0.210268	1.6025	0.109046	0.220376	TRUE
ACSL4	1704.63	0.173437	0.100692	1.72246	0.0849863	0.183005	TRUE
ACSL5	1033.07	-0.837272	0.259032	-3.23231	0.00122794	0.00757543	TRUE
ACSL6	8.8584	-2.39995	0.458673	-5.23236	1.67355e-07	7.8249e-06	TRUE
ACSM1	1296.93	1.45441	0.319532	4.55168	5.32194e-06	0.00011917	TRUE
ACSM2A	36748.6	1.00194	0.358685	2.79337	0.00521615	0.0228107	TRUE
ACSM3	9483.2	0.86281	0.485661	1.77657	0.0756392	0.167954	TRUE
ACSM4	4.19371	0.0805724	0.472852	0.170397	0.864698	0.919695	TRUE
ACSM5	900.604	0.44747	0.22527	1.98638	0.0469916	0.118525	TRUE
ACSS1	12099.3	0.291331	0.23834	1.22234	0.22158	0.36696	TRUE
ACSS2	11481.5	0.181459	0.33005	0.549792	0.582462	0.716518	TRUE
ACSS3	7890.15	0.905742	0.313259	2.89135	0.0038359	0.0180151	TRUE
ACTA1	86.338	-0.748245	0.403034	-1.85653	0.0633775	0.148094	TRUE
ACTA2	1363.83	-0.7476	0.206516	-3.62006	0.000294531	0.00259602	TRUE
ACTB	38286.9	-0.321316	0.120061	-2.67628	0.00744443	0.0298467	TRUE
ACTBL2	0	NA	NA	NA	NA	NA	FALSE
ACTC1	2.09305	-0.62538	0.462623	-1.35181	0.176435	0.311706	TRUE
ACTG1	138.672	0.0200637	0.166292	0.120653	0.903966	0.943835	FALSE
ACTG2	21.4519	-0.325286	0.392071	-0.829663	0.40673	0.560561	TRUE
ACTL10	5.93528	-0.0933398	0.432827	-0.215651	0.82926	0.897133	FALSE
ACTL11	0	NA	NA	NA	NA	NA	FALSE
ACTL6A	658.411	0.183729	0.0697257	2.63502	0.00841312	0.0325774	TRUE
ACTL6B	0	NA	NA	NA	NA	NA	TRUE
ACTL7A	5.3385	-0.336584	0.426049	-0.790012	0.429521	0.582226	TRUE
ACTL7B	5.66931	-0.220189	0.453811	-0.485199	0.627535	0.754404	FALSE
ACTL9	0	NA	NA	NA	NA	NA	FALSE
ACTL9B	0	NA	NA	NA	NA	NA	FALSE
ACTN1	1052.89	-0.143916	0.130856	-1.09981	0.271417	0.421884	FALSE
ACTN2	8.63871	0.0895124	0.449098	0.199316	0.842016	0.906113	TRUE
ACTN3	19.581	-0.45287	0.337733	-1.34091	0.17995	0.316118	FALSE
ACTN4	14255.8	0.224144	0.0786141	2.8512	0.00435547	0.0198907	TRUE
ACTR10	1414.31	0.163919	0.0648867	2.52624	0.0115292	0.0412065	TRUE
ACTR1A	2772.7	0.068845	0.0629962	1.09284	0.274463	0.424976	TRUE
ACTR1B	3250	0.261141	0.107142	2.43733	0.014796	0.049819	TRUE
ACTR2	7853.41	0.134482	0.120996	1.11145	0.266374	0.416462	TRUE
ACTR3	4832.37	0.0403718	0.0691023	0.584233	0.559064	0.696716	TRUE
ACTR3B	13.6315	-1.16408	0.379512	-3.06731	0.00215995	0.0115666	TRUE
ACTR5	148.52	-0.0382577	0.133366	-0.286863	0.774217	0.859738	TRUE
ACTR6	309.469	-0.16543	0.1205	-1.37287	0.169793	0.303049	TRUE
ACTR8	1007.75	0.324686	0.109221	2.97275	0.00295149	0.0147478	TRUE
ACTRT1	0	NA	NA	NA	NA	NA	FALSE
ACTRT2	0.452893	0.183265	0.261551	0.700686	0.483499	NA	TRUE
ACTRT3	2.35548	-0.631442	0.451915	-1.39726	0.162336	0.293087	FALSE
ACVR1	557.835	-0.144908	0.179634	-0.806685	0.419848	0.573351	TRUE
ACVR1B	806.618	0.219993	0.212668	1.03444	0.300929	0.453759	TRUE
ACVR1C	46.2257	-0.297371	0.43504	-0.683549	0.49426	0.638889	TRUE
ACVR2A	292.375	0.228975	0.201543	1.13611	0.255912	0.40502	TRUE
ACVR2B	181.81	0.109514	0.128589	0.851659	0.394403	0.548997	TRUE
ACVRL1	962.277	-0.357329	0.110777	-3.22565	0.00125686	0.00768923	TRUE
ACY1	26961.6	0.580268	0.244683	2.37151	0.0177157	0.0571418	TRUE
ACY3	10595.4	0.488986	0.217201	2.2513	0.0243663	0.0726978	TRUE
ACYP1	249.096	0.0574048	0.196366	0.292336	0.770029	0.856665	TRUE
ACYP2	229.053	0.230452	0.14506	1.58867	0.112136	0.224844	TRUE
ADA	482.522	-0.228592	0.263367	-0.867962	0.385415	0.540273	TRUE
ADAD1	1.99652	-0.164904	0.39055	-0.422235	0.672853	0.787266	TRUE
ADAD2	0.104265	0.0336651	0.260855	0.129056	0.897313	NA	TRUE
ADAL	106.536	0.2124	0.148108	1.43409	0.151547	0.279474	TRUE
ADAM10	1601.32	0.162072	0.135917	1.19243	0.233092	0.379764	TRUE
ADAM11	15.3162	0.187058	0.390844	0.478601	0.632223	0.757474	TRUE
ADAM12	192.099	-1.40231	0.279847	-5.011	5.4149e-07	2.04014e-05	TRUE
ADAM15	1112.91	-0.596567	0.219686	-2.71555	0.00661659	0.0272926	TRUE
ADAM17	1272.4	-0.149913	0.120363	-1.24551	0.212944	0.355947	TRUE
ADAM18	0.137243	-0.0673637	0.260855	-0.258242	0.79622	NA	TRUE
ADAM19	219.144	-1.21907	0.309853	-3.93434	8.34261e-05	0.00100582	TRUE
ADAM1A	245.116	-0.010621	0.204158	-0.0520235	0.95851	0.975619	FALSE
ADAM2	0	NA	NA	NA	NA	NA	TRUE
ADAM20	0	NA	NA	NA	NA	NA	FALSE
ADAM22	392.808	0.880178	0.327083	2.69099	0.00712401	0.0288222	TRUE
ADAM23	41.1346	-1.30746	0.334461	-3.90914	9.26238e-05	0.00108507	TRUE
ADAM24	0	NA	NA	NA	NA	NA	FALSE
ADAM26A	0	NA	NA	NA	NA	NA	FALSE
ADAM28	0	NA	NA	NA	NA	NA	TRUE
ADAM30	2.02238	0.155987	0.476002	0.327701	0.743138	0.837541	TRUE
ADAM32	0.997938	-0.0744131	0.371371	-0.200374	0.841188	NA	TRUE
ADAM33	15.3333	-0.741763	0.376511	-1.9701	0.0488271	0.121975	TRUE
ADAM34	0	NA	NA	NA	NA	NA	FALSE
ADAM34L	0	NA	NA	NA	NA	NA	FALSE
ADAM3A	0	NA	NA	NA	NA	NA	FALSE
ADAM4	21.9047	0.529435	0.282047	1.87712	0.0605021	0.143027	FALSE
ADAM4L1	29.2587	0.17522	0.266377	0.657788	0.510675	0.6536	FALSE
ADAM5	0.235418	-0.123491	0.260855	-0.473408	0.635922	NA	FALSE
ADAM6	0	NA	NA	NA	NA	NA	FALSE
ADAM7	0	NA	NA	NA	NA	NA	FALSE
ADAM8	45.5388	-1.55155	0.38751	-4.00391	6.23037e-05	0.000804609	TRUE
ADAM9	2007.84	0.361003	0.168423	2.14343	0.0320784	0.0888644	TRUE
ADAMDEC1	0.294526	-0.179618	0.260855	-0.688573	0.491092	NA	TRUE
ADAMTS1	1259.55	-0.552499	0.224598	-2.45994	0.0138959	0.0474125	TRUE
ADAMTS10	665.366	-0.674197	0.154881	-4.35299	1.34293e-05	0.00024426	TRUE
ADAMTS12	114.426	-1.34222	0.331375	-4.05046	5.1116e-05	0.000689126	TRUE
ADAMTS14	51.385	-1.07247	0.366756	-2.92422	0.0034532	0.0166248	TRUE
ADAMTS15	165.849	-0.978591	0.323619	-3.0239	0.00249543	0.0129521	TRUE
ADAMTS16	241.032	0.389233	0.288944	1.34709	0.177951	0.3135	TRUE
ADAMTS17	23.5592	-0.850208	0.431062	-1.97236	0.0485691	0.121596	TRUE
ADAMTS18	0.82709	0.0774656	0.444644	0.174219	0.861693	NA	TRUE
ADAMTS19	2.9179	-0.22926	0.483501	-0.474166	0.635381	0.75921	TRUE
ADAMTS2	164.242	-1.87529	0.371644	-5.04594	4.51306e-07	1.75521e-05	TRUE
ADAMTS20	0.0981752	-0.0673637	0.260855	-0.258242	0.79622	NA	TRUE
ADAMTS3	76.3163	-0.52869	0.2493	-2.1207	0.0339473	0.0924539	TRUE
ADAMTS4	91.3452	-1.61392	0.406506	-3.97022	7.18071e-05	0.000895235	TRUE
ADAMTS5	265.393	-0.209467	0.174728	-1.19882	0.2306	0.376977	TRUE
ADAMTS6	100.52	-0.0903879	0.247376	-0.365386	0.714823	0.818858	TRUE
ADAMTS7	104.032	-1.47386	0.335202	-4.39693	1.0979e-05	0.000207543	TRUE
ADAMTS8	247.214	-0.0926042	0.349396	-0.265041	0.790978	0.87147	FALSE
ADAMTS9	388.932	-0.204393	0.196598	-1.03965	0.298503	0.45123	TRUE
ADAMTSL1	211.78	-1.20998	0.189613	-6.38134	1.75548e-10	2.37047e-08	TRUE
ADAMTSL2	774.105	-0.764892	0.265237	-2.88381	0.00392897	0.018345	TRUE
ADAMTSL3	118.292	-0.020796	0.340882	-0.0610064	0.951354	0.971415	TRUE
ADAMTSL4	406.159	-1.00022	0.239323	-4.17937	2.92324e-05	0.000445319	TRUE
ADAMTSL5	71.6997	-1.42042	0.348863	-4.07158	4.66962e-05	0.000643871	TRUE
ADAP1	247.02	-1.33716	0.256277	-5.21764	1.8122e-07	8.28948e-06	TRUE
ADAP2	991.132	0.791109	0.30014	2.6358	0.00839394	0.0325115	TRUE
ADAR	911.712	-0.0935705	0.164173	-0.569952	0.56871	0.705154	TRUE
ADARB1	559.296	-0.282631	0.100491	-2.81249	0.00491591	0.0218296	TRUE
ADARB2	1.47733	-0.342234	0.477975	-0.716007	0.473987	0.621055	TRUE
ADAT1	65.2436	-0.00381863	0.233147	-0.0163786	0.986932	0.992637	TRUE
ADAT2	111.181	0.190181	0.149492	1.27218	0.20331	0.344648	TRUE
ADAT3	103.757	0.26314	0.140604	1.8715	0.0612759	0.144392	TRUE
ADC	124.526	0.0111002	0.142036	0.0781506	0.937708	0.962631	TRUE
ADCK1	255.539	0.106406	0.127597	0.833919	0.404327	0.558213	TRUE
ADCK2	526.92	0.128225	0.0854796	1.50007	0.133596	0.255724	TRUE
ADCK3	2707.91	0.49828	0.263895	1.88818	0.0590024	0.140208	TRUE
ADCK4	555	0.0436593	0.0706655	0.617829	0.536688	0.677138	TRUE
ADCK5	632.489	-0.0585023	0.210938	-0.277344	0.781516	0.864884	TRUE
ADCY1	580.858	1.02503	0.423957	2.41777	0.0156158	0.051804	TRUE
ADCY10	18.8533	-0.0193416	0.331829	-0.0582877	0.953519	0.972945	TRUE
ADCY2	45.6252	-1.69076	0.427048	-3.95918	7.5207e-05	0.000926088	FALSE
ADCY3	237.678	-1.40902	0.214783	-6.56022	5.37295e-11	8.63715e-09	TRUE
ADCY4	272.935	-0.680385	0.216875	-3.13723	0.00170554	0.00968637	TRUE
ADCY5	380.015	-0.34449	0.147507	-2.33542	0.0195214	0.0616236	TRUE
ADCY6	3118.27	-0.182128	0.189141	-0.962921	0.335587	0.490125	TRUE
ADCY7	128.259	-1.40343	0.38824	-3.61485	0.000300519	0.0026255	TRUE
ADCY8	0.451914	-0.351879	0.316456	-1.11194	0.266165	NA	TRUE
ADCYAP1	1.41493	-0.0565723	0.456189	-0.124011	0.901307	0.942925	TRUE
ADCYAP1R1	68.9679	-1.07297	0.305762	-3.50916	0.000449517	0.00355049	TRUE
ADD1	10168.1	0.133719	0.0891516	1.4999	0.13364	0.255778	TRUE
ADD2	15.8703	-0.672432	0.458357	-1.46705	0.142363	0.267707	TRUE
ADD3	6463.53	0.76511	0.208193	3.67501	0.000237844	0.0022328	TRUE
ADGB	14.9012	-0.400917	0.300106	-1.33592	0.181576	0.318093	TRUE
ADH1	3028.36	0.213943	0.440648	0.485518	0.627309	0.754263	FALSE
ADH4	7.29116	0.727361	0.413859	1.75751	0.0788306	0.172646	FALSE
ADH5	2093.22	0.321305	0.138923	2.31282	0.0207324	0.0643868	TRUE
ADH6	25.4275	0.407452	0.451903	0.901636	0.36725	0.522401	FALSE
ADH6A	3.2668	0.0535927	0.45352	0.118171	0.905933	0.944811	FALSE
ADH7	4.14825	-0.510056	0.467769	-1.0904	0.275536	0.426237	FALSE
ADHFE1	4746.55	0.195529	0.230707	0.847521	0.396705	0.551064	TRUE
ADI1	2607.6	0.253744	0.131363	1.93162	0.0534063	0.130399	TRUE
ADIG	0	NA	NA	NA	NA	NA	FALSE
ADIPOQ	256.715	0.290728	0.200694	1.44862	0.147444	0.274329	TRUE
ADIPOR1	6322.94	0.291882	0.0891453	3.27422	0.00105953	0.00677415	TRUE
ADIPOR2	3600.66	0.304251	0.0878607	3.46288	0.000534422	0.0040487	TRUE
ADK	4927.92	0.412828	0.187195	2.20533	0.0274307	0.079227	TRUE
ADM	258.838	-0.255442	0.349982	-0.729871	0.465469	0.613464	FALSE
ADM2	942.298	0.891445	0.282611	3.15432	0.00160874	0.00922975	TRUE
ADNP	2763.21	-0.0937455	0.0652343	-1.43706	0.150701	0.278455	FALSE
ADNP2	461.03	0.141501	0.0914736	1.5469	0.121887	0.238864	TRUE
ADO	108.259	0.0288718	0.162474	0.177701	0.858958	0.916051	TRUE
ADORA1	91.7238	-1.69435	0.398461	-4.25225	2.11633e-05	0.000348844	TRUE
ADORA2A	167.912	-1.64974	0.363812	-4.5346	5.77114e-06	0.000126672	TRUE
ADORA2B	45.1109	-1.10189	0.258643	-4.26029	2.04163e-05	0.000339848	TRUE
ADORA3	0	NA	NA	NA	NA	NA	TRUE
ADPGK	485.954	0.106964	0.114984	0.930255	0.352239	0.507161	TRUE
ADPRH	383.38	-0.25723	0.137045	-1.87698	0.0605211	0.143052	TRUE
ADPRHL1	5.40733	0.122543	0.434458	0.282059	0.777899	0.862412	TRUE
ADPRHL2	796.684	0.0252803	0.102087	0.247635	0.804417	0.881557	TRUE
ADPRM	319.279	0.108295	0.115921	0.934211	0.350195	0.505036	TRUE
ADRA1A	373.728	0.961777	0.261206	3.68206	0.000231354	0.00219219	TRUE
ADRA1B	331.856	0.203965	0.326093	0.625482	0.531655	0.67285	FALSE
ADRA1D	68.6952	-1.80735	0.441454	-4.09408	4.23847e-05	0.000592718	TRUE
ADRA2A	166.343	-2.14157	0.358624	-5.97163	2.34896e-09	2.15479e-07	TRUE
ADRA2B	1694.47	0.454913	0.170456	2.66881	0.00761214	0.0303318	TRUE
ADRA2C	14.6596	-1.89833	0.452363	-4.19648	2.711e-05	0.000421741	FALSE
ADRB1	48.3735	0.607076	0.361273	1.68038	0.0928831	0.195938	TRUE
ADRB2	53.9009	-0.714166	0.233609	-3.0571	0.00223491	0.011885	FALSE
ADRB3	0	NA	NA	NA	NA	NA	TRUE
ADRBK1	1394.11	-0.109584	0.100797	-1.08717	0.27696	0.427619	TRUE
ADRBK2	49.1313	-0.377375	0.416962	-0.905059	0.365434	0.520649	TRUE
ADRM1	2373	0.303807	0.115337	2.63408	0.00843653	0.0326531	TRUE
ADSL	992.659	0.233418	0.110708	2.10841	0.0349958	0.0945262	TRUE
ADSS	3152.69	0.219384	0.069954	3.13612	0.00171201	0.00971329	TRUE
ADSSL1	71.5941	-0.231778	0.201037	-1.15291	0.248946	0.397274	TRUE
ADTRP	943.225	0.63072	0.429383	1.4689	0.14186	0.267299	TRUE
AEBP1	3518.98	-0.795588	0.183332	-4.33962	1.42732e-05	0.000256568	TRUE
AEBP2	1591.66	-0.0161744	0.0784891	-0.206072	0.836735	0.902329	FALSE
AEN	512.891	-0.00342278	0.077868	-0.0439561	0.964939	0.979152	TRUE
AES	6584.61	-0.391479	0.0858145	-4.56192	5.06873e-06	0.000114704	TRUE
AFAP1	159.618	-0.164982	0.190865	-0.864392	0.387373	0.542026	TRUE
AFAP1L1	424.381	-0.683367	0.296873	-2.30189	0.0213415	0.0659006	TRUE
AFAP1L2	611.702	-0.479836	0.10594	-4.5293	5.91781e-06	0.00012922	TRUE
AFF1	2018.57	-0.336024	0.114387	-2.9376	0.00330765	0.0160893	TRUE
AFF2	8.31649	-1.35699	0.46349	-2.92776	0.00341417	0.0164933	TRUE
AFF3	116.125	-0.827386	0.319961	-2.5859	0.00971258	0.0361955	TRUE
AFF4	2766.08	0.0986849	0.12902	0.764882	0.444342	0.59532	TRUE
AFG3L1	1569.17	0.322709	0.192708	1.6746	0.0940134	0.197689	FALSE
AFG3L2	1967.31	0.121507	0.100637	1.20738	0.227285	0.373353	TRUE
AFM	1317.08	0.056751	0.423056	0.134146	0.893287	0.93887	FALSE
AFMID	4765.46	0.738391	0.280419	2.63317	0.00845922	0.0326959	TRUE
AFP	0.57186	0.0276358	0.363953	0.0759322	0.939473	NA	TRUE
AFTPH	3855.31	0.403035	0.130213	3.09519	0.00196684	0.0107752	TRUE
AGA	1243.53	0.350876	0.148593	2.36132	0.0182099	0.0584011	TRUE
AGAP1	2654.67	0.0590675	0.137372	0.429981	0.667209	0.783323	TRUE
AGAP2	78.2286	-1.26495	0.319293	-3.96173	7.44078e-05	0.000919925	TRUE
AGAP3	782.91	-0.109175	0.0901155	-1.2115	0.225702	0.371712	TRUE
AGBL1	1.85652	-0.208199	0.479906	-0.433833	0.66441	0.781231	TRUE
AGBL2	23.4261	-1.07198	0.292248	-3.66806	0.0002444	0.00227646	FALSE
AGBL3	163.419	-0.15363	0.194417	-0.79021	0.429405	0.582116	TRUE
AGBL4	11.0578	0.330388	0.429524	0.769196	0.441777	0.592935	TRUE
AGBL5	366.948	0.175465	0.0998354	1.75754	0.078826	0.172646	TRUE
AGER	27.7243	-0.376486	0.298459	-1.26143	0.207153	0.349165	TRUE
AGFG1	1005.15	-0.105485	0.124224	-0.849149	0.395798	0.550303	TRUE
AGFG2	771.29	-0.702461	0.115695	-6.07166	1.26593e-09	1.28721e-07	TRUE
AGGF1	940.931	0.0519317	0.0676313	0.767865	0.442568	0.59376	TRUE
AGK	344.496	-0.0372346	0.115813	-0.321505	0.747828	0.840665	TRUE
AGL	1515.3	0.216704	0.159357	1.35986	0.173873	0.308569	TRUE
AGMAT	3370.3	-0.0575964	0.168217	-0.342393	0.732055	0.831256	TRUE
AGMO	32.8609	0.551427	0.399912	1.37887	0.167934	0.300399	FALSE
AGO2	187.734	0.327725	0.204427	1.60314	0.108904	0.220247	TRUE
AGO3	101.148	0.399864	0.189737	2.10747	0.0350772	0.0946702	TRUE
AGO4	241.442	-0.571465	0.18074	-3.1618	0.00156797	0.0090605	TRUE
AGPAT1	3111.75	0.405844	0.112137	3.61918	0.000295537	0.00259811	TRUE
AGPAT2	387.095	-0.77642	0.152422	-5.0939	3.50781e-07	1.41986e-05	TRUE
AGPAT3	3755.83	0.451641	0.116206	3.88657	0.00010167	0.00115873	TRUE
AGPAT4	481.516	0.0424378	0.146345	0.289984	0.771829	0.857988	TRUE
AGPAT5	460.171	-0.0152107	0.147506	-0.103119	0.917868	0.951775	TRUE
AGPAT6	1837.68	0.200075	0.112936	1.77157	0.0764657	0.169245	TRUE
AGPAT9	591.734	0.638705	0.218913	2.91762	0.00352711	0.0168896	TRUE
AGPS	307.224	0.0320618	0.210074	0.152621	0.878697	0.929002	TRUE
AGR2	0.431768	-0.227726	0.261064	-0.8723	0.383044	NA	TRUE
AGR3	0	NA	NA	NA	NA	NA	FALSE
AGRN	2291.37	-0.295609	0.22241	-1.32911	0.183811	0.321174	TRUE
AGRP	13.3416	0.540596	0.409487	1.32018	0.186775	0.324771	TRUE
AGT	1000.24	0.231838	0.367916	0.630138	0.528604	0.670145	FALSE
AGTPBP1	1630.8	0.660704	0.15541	4.25137	2.12466e-05	0.000349874	TRUE
AGTR1A	1269.47	0.0975263	0.121005	0.805971	0.42026	0.573813	FALSE
AGTR1B	139.972	-0.188795	0.17871	-1.05643	0.290771	0.442913	FALSE
AGTR2	0	NA	NA	NA	NA	NA	FALSE
AGTRAP	3692.09	0.825693	0.173386	4.76216	1.91534e-06	5.24821e-05	TRUE
AGXT	0	NA	NA	NA	NA	NA	TRUE
AGXT2	32996.3	0.80077	0.21827	3.66872	0.000243772	0.0022724	TRUE
AHCTF1	1589.21	0.236411	0.122657	1.92741	0.0539281	0.131349	TRUE
AHCY	5558.59	0.365399	0.202791	1.80185	0.0715694	0.161608	FALSE
AHCYL1	4815.43	0.245897	0.0661171	3.71912	0.000199918	0.00196874	TRUE
AHCYL2	11156.1	0.890981	0.285876	3.11667	0.00182903	0.0101889	TRUE
AHDC1	848.069	-0.256289	0.0890467	-2.87814	0.00400023	0.0185852	TRUE
AHI1	835.384	-0.0510499	0.103538	-0.493056	0.621973	0.750441	TRUE
AHNAK	4800.12	-0.803339	0.183931	-4.3676	1.25617e-05	0.000231473	TRUE
AHNAK2	94.1393	-0.659347	0.384448	-1.71505	0.0863364	0.185215	TRUE
AHR	237.115	0.261753	0.21402	1.22303	0.221318	0.36667	TRUE
AHRR	31.2921	1.97551	0.358563	5.50952	3.59809e-08	2.10875e-06	TRUE
AHSA1	2410.5	0.113996	0.12636	0.902148	0.366978	0.522263	TRUE
AHSA2	377.584	0.0874568	0.127479	0.686048	0.492683	0.637632	TRUE
AHSG	8.53871	0.278282	0.455727	0.610633	0.541442	0.681253	TRUE
AHSP	14.4666	-0.938076	0.477877	-1.96301	0.0496453	0.123684	TRUE
AICDA	0	NA	NA	NA	NA	NA	TRUE
AIDA	628.352	-0.497827	0.130922	-3.80249	0.000143251	0.00152455	TRUE
AIF1	434.732	-0.788435	0.273159	-2.88636	0.00389722	0.018232	TRUE
AIF1L	13646.7	0.0537092	0.176674	0.304002	0.761127	0.850035	TRUE
AIFM1	4637.89	0.419917	0.1361	3.08535	0.00203311	0.0110521	TRUE
AIFM2	431.131	0.301626	0.109137	2.76373	0.00571446	0.0243793	TRUE
AIFM3	107.935	0.498649	0.312872	1.59378	0.110985	0.223253	TRUE
AIG1	93.3244	-0.383618	0.212244	-1.80744	0.0706942	0.160146	TRUE
AIM1	645.715	-0.762161	0.372388	-2.04669	0.0406889	0.106281	TRUE
AIM1L	264.704	0.0971199	0.295223	0.328971	0.742178	0.837166	TRUE
AIM2	26.4797	-1.37668	0.357802	-3.8476	0.000119281	0.00132632	TRUE
AIMP1	780.222	-0.0171082	0.11022	-0.155218	0.876649	0.927593	TRUE
AIMP2	720.305	-0.0752812	0.142906	-0.526789	0.59834	0.73041	TRUE
AIP	1126.56	-0.0526543	0.0927319	-0.567812	0.570163	0.706693	TRUE
AIPL1	0	NA	NA	NA	NA	NA	TRUE
AIRE	0.116057	-0.0673637	0.260855	-0.258242	0.79622	NA	TRUE
AJAP1	6.85235	-0.168627	0.465376	-0.362345	0.717094	0.820321	TRUE
AJUBA	829.279	-0.656859	0.190487	-3.44831	0.000564098	0.00420557	TRUE
AK1	917.298	-0.175141	0.182917	-0.95749	0.33832	0.493027	TRUE
AK2	4298.24	0.656396	0.264517	2.48149	0.0130836	0.045356	TRUE
AK3	2858.97	0.511375	0.177795	2.8762	0.00402499	0.018654	TRUE
AK4	22932.5	0.767103	0.242553	3.16262	0.00156357	0.00904341	TRUE
AK5	0.794546	-0.249983	0.439707	-0.568522	0.56968	NA	TRUE
AK6	495.492	0.230932	0.143706	1.60698	0.108058	0.218931	FALSE
AK7	32.2341	0.214343	0.284101	0.754461	0.450573	0.601108	TRUE
AK8	0.711366	-0.123153	0.430565	-0.286026	0.774858	NA	TRUE
AKAP1	2399.25	0.60452	0.128106	4.71889	2.3713e-06	6.28338e-05	TRUE
AKAP10	861.693	0.0654402	0.0792273	0.825981	0.408815	0.562837	TRUE
AKAP11	2508.25	0.279645	0.127505	2.19321	0.0282924	0.0811227	TRUE
AKAP12	1219.12	-1.42192	0.338633	-4.199	2.68091e-05	0.000418464	TRUE
AKAP13	2567.58	-0.0982148	0.089943	-1.09197	0.274848	0.425454	TRUE
AKAP14	0.878727	0.337186	0.444927	0.757846	0.448543	NA	TRUE
AKAP17A	1272.17	-0.0727408	0.0845931	-0.859891	0.389849	0.544463	TRUE
AKAP17B	382.062	-0.344508	0.156029	-2.20797	0.027246	0.0788286	FALSE
AKAP2	20096.4	0.818001	0.303537	2.69489	0.00704115	0.0285511	TRUE
AKAP3	9.73324	-0.106964	0.410378	-0.260647	0.794364	0.874345	TRUE
AKAP4	0	NA	NA	NA	NA	NA	TRUE
AKAP5	4.95857	-0.172307	0.486906	-0.353881	0.723428	0.824939	TRUE
AKAP6	30.2394	0.00903562	0.340327	0.0265499	0.978819	0.987172	TRUE
AKAP7	163.832	0.208953	0.152553	1.36971	0.170777	0.304259	TRUE
AKAP8	1694.69	-0.0514792	0.0647568	-0.794961	0.426636	0.579666	TRUE
AKAP8L	597.524	-0.0837444	0.17803	-0.470395	0.638073	0.761456	TRUE
AKAP9	1550.13	0.0765441	0.153267	0.499416	0.617486	0.747075	TRUE
AKD2	0.235418	-0.123491	0.260855	-0.473408	0.635922	NA	FALSE
AKIP1	154.531	-0.377424	0.195341	-1.93213	0.053343	0.130319	TRUE
AKIRIN1	1036.55	0.173293	0.0781803	2.21658	0.0266517	0.0775478	FALSE
AKIRIN2	1206.5	-0.0506739	0.0801368	-0.632343	0.527163	0.66872	TRUE
AKNA	423.952	-1.06373	0.281982	-3.77233	0.000161729	0.00166859	TRUE
AKNAD1	16.1975	0.449534	0.347132	1.29499	0.195322	0.335181	TRUE
AKP3	0	NA	NA	NA	NA	NA	FALSE
AKR1A1	45677.9	0.7631	0.305866	2.49488	0.0125999	0.0441691	TRUE
AKR1B1	1169.08	-1.08888	0.388996	-2.79921	NA	NA	TRUE
AKR1B10	86.3329	0.374994	0.460133	0.814969	0.41509	0.568556	TRUE
AKR1B7	0.628224	-0.448165	0.326702	-1.37178	0.170131	NA	FALSE
AKR1B8	962.278	1.13699	0.411243	2.76475	0.00569658	0.0243239	FALSE
AKR1C1	4360.99	1.10578	0.476934	2.31852	0.0204209	0.0637007	TRUE
AKR1C12	332.721	0.906407	0.382607	2.36903	0.0178348	0.0574583	FALSE
AKR1C12L1	4559.7	0.321237	0.383183	0.838339	0.40184	0.555819	FALSE
AKR1C13	116.532	-0.258767	0.404508	-0.639708	0.522362	0.664377	FALSE
AKR1C14	192.229	-1.59809	0.429527	-3.72057	0.000198771	0.00195858	FALSE
AKR1C19	537.477	0.195453	0.165333	1.18218	0.237135	0.384237	FALSE
AKR1C2	350.385	0.292308	0.428124	0.682765	0.494755	0.639236	TRUE
AKR1C3	0.510856	0.209031	0.367556	0.568706	0.569556	NA	FALSE
AKR1CL	85.3602	0.0146433	0.30225	0.0484476	0.96136	0.977282	FALSE
AKR1D1	12.7172	-0.0790679	0.392499	-0.201448	0.840349	0.904796	TRUE
AKR1E2	1920.21	0.634595	0.182331	3.48046	0.000500563	0.00384783	TRUE
AKR7A2	11748.3	0.656264	0.270147	2.42928	0.0151288	0.0505661	TRUE
AKR7A3	15525.1	0.601907	0.238076	2.52821	0.0114645	0.0410237	FALSE
AKT1	2448.57	-0.184522	0.105342	-1.75164	0.0798357	0.174304	TRUE
AKT1S1	1074.07	0.109055	0.147933	0.737191	0.461006	0.609917	TRUE
AKT2	2182.36	0.0118528	0.0665856	0.178009	0.858716	0.915914	TRUE
AKT3	115.166	-0.717333	0.265229	-2.70458	0.00683911	0.0279712	TRUE
AKTIP	2492.56	-0.0156645	0.12784	-0.122532	0.902478	0.943449	TRUE
ALAD	2988.75	0.835963	0.258781	3.23039	0.00123623	0.00760712	TRUE
ALAS1	2237.31	0.049426	0.0750537	0.658542	0.51019	0.653147	FALSE
ALAS2	606.308	-0.873871	0.36206	-2.41361	0.0157955	0.052215	TRUE
ALB	111.141	0.445352	0.415073	1.07295	0.283294	0.434824	TRUE
ALCAM	496.495	-0.650131	0.277833	-2.34	0.0192835	0.0610621	TRUE
ALDH16A1	2525.19	0.455207	0.150331	3.02803	0.00246155	0.0128276	TRUE
ALDH18A1	354.692	0.0427181	0.154923	0.275738	0.78275	0.865806	TRUE
ALDH1A1	14830.8	0.901821	0.238568	3.78015	0.000156734	0.00162985	TRUE
ALDH1A2	244.638	-1.57119	0.274701	-5.71962	1.0676e-08	7.52733e-07	TRUE
ALDH1A3	188.078	-1.08479	0.274981	-3.94496	7.9814e-05	0.000971991	TRUE
ALDH1A7	1.28224	-0.210813	0.482398	-0.43701	0.662104	0.779824	FALSE
ALDH1B1	172.644	-0.105274	0.484648	-0.217218	0.828039	0.896373	FALSE
ALDH1L1	5368.85	0.342812	0.200062	1.71353	0.0866152	0.185672	TRUE
ALDH1L2	9.41143	0.0255558	0.388317	0.0658117	0.947528	0.969136	TRUE
ALDH2	22986.6	0.498816	0.269424	1.85142	0.0641095	0.149259	TRUE
ALDH3A1	5.07162	-0.565533	0.48077	-1.17631	0.239472	0.38675	TRUE
ALDH3A2	1353.54	-0.338202	0.173291	-1.95164	0.0509814	0.125972	TRUE
ALDH3B1	58.894	0.00511037	0.258831	0.019744	0.984248	0.990806	TRUE
ALDH3B2	0	NA	NA	NA	NA	NA	FALSE
ALDH4A1	10089.1	0.244198	0.240927	1.01358	0.310784	0.464059	TRUE
ALDH5A1	510.4	-0.446261	0.205465	-2.17195	0.0298592	0.0843364	TRUE
ALDH6A1	40967.4	0.574079	0.221042	2.59715	0.00940018	0.0353297	TRUE
ALDH7A1	20003.4	0.665959	0.254366	2.61811	0.0088417	0.033734	TRUE
ALDH8A1	12811	0.854972	0.234884	3.63997	0.000272668	0.00245722	TRUE
ALDH9A1	12584.5	0.661104	0.229844	2.87632	0.00402344	0.0186519	FALSE
ALDOA	22202.9	0.12911	0.117123	1.10235	0.270311	0.42063	TRUE
ALDOART2	0.81017	-0.0343327	0.37668	-0.0911455	0.927377	NA	FALSE
ALDOB	174213	0.786413	0.345803	2.27416	0.0229561	0.0696023	TRUE
ALDOC	31.5367	-1.20053	0.357127	-3.36162	0.000774863	0.00532529	TRUE
ALG1	303.901	0.475756	0.124601	3.81824	0.000134406	0.00145426	TRUE
ALG10	322.538	0.568409	0.22768	2.49652	0.0125418	0.0440292	TRUE
ALG11	1012.48	0.233686	0.128535	1.81808	0.0690518	0.157475	TRUE
ALG12	347.913	0.306527	0.108256	2.8315	0.00463306	0.0208654	TRUE
ALG13	308.852	-0.0537956	0.159276	-0.337751	0.735551	0.833491	TRUE
ALG14	740.423	0.0769987	0.0939952	0.819177	0.412686	0.566503	TRUE
ALG2	1210.38	0.0419822	0.124878	0.336185	0.736731	0.833939	TRUE
ALG3	457.022	0.145805	0.0955897	1.52533	0.127178	0.246668	TRUE
ALG5	624.673	0.228725	0.088489	2.58478	0.00974398	0.0362562	TRUE
ALG6	259.853	0.187267	0.12442	1.50512	0.132293	0.254064	TRUE
ALG8	187.886	-0.127466	0.141244	-0.90245	0.366818	0.522138	TRUE
ALG9	534.73	-0.117095	0.0728017	-1.60841	0.107745	0.218638	TRUE
ALK	1.96026	-0.200671	0.48661	-0.412385	0.680057	0.792544	TRUE
ALKBH1	484.261	-0.0649746	0.101788	-0.63833	0.523259	0.665317	TRUE
ALKBH2	301.811	0.337437	0.20421	1.6524	0.098452	0.204057	TRUE
ALKBH3	761.788	0.264958	0.0859514	3.08265	0.00205165	0.0111278	TRUE
ALKBH4	105.999	0.0622878	0.168108	0.370523	0.710993	0.816551	TRUE
ALKBH5	655.803	0.334038	0.163264	2.046	0.0407563	0.106424	TRUE
ALKBH6	0.234378	-0.123491	0.260855	-0.473408	0.635922	NA	TRUE
ALKBH7	471.519	0.120836	0.2051	0.589156	0.555756	0.693832	TRUE
ALKBH8	103.573	0.0848947	0.182173	0.46601	0.641208	0.76347	TRUE
ALLC	0.295839	0.123468	0.260855	0.473322	0.635984	NA	FALSE
ALMS1	504.027	-0.0712629	0.14345	-0.496778	0.619345	0.748259	TRUE
ALOX12	54.0908	-0.714386	0.289563	-2.46712	0.0136206	0.0467281	TRUE
ALOX12B	0.137243	-0.0673637	0.260855	-0.258242	0.79622	NA	TRUE
ALOX12E	0.770211	0.214918	0.438714	0.489882	0.624218	NA	FALSE
ALOX15	45.0539	-0.504031	0.414042	-1.21734	0.223474	0.369262	TRUE
ALOX15B	72.1098	-2.33698	0.485356	-4.81498	NA	NA	FALSE
ALOX5	32.3285	-1.90568	0.481528	-3.95756	NA	NA	TRUE
ALOX5AP	90.4395	-1.19915	0.328107	-3.65474	0.000257441	0.0023669	FALSE
ALOXE3	21.5719	-0.456761	0.326124	-1.40057	0.161342	0.291801	TRUE
ALPI	0	NA	NA	NA	NA	NA	TRUE
ALPK1	91.0461	-1.20673	0.313258	-3.85218	0.000117073	0.0013052	TRUE
ALPK2	84.026	-0.440705	0.192915	-2.28446	0.0223447	0.0682254	TRUE
ALPK3	92.7507	0.0748413	0.390255	0.191775	0.847918	0.909542	TRUE
ALPL	8499.63	0.91481	0.310384	2.94735	0.00320513	0.015681	TRUE
ALPP	0.2533	-0.123491	0.260855	-0.473408	0.635922	NA	FALSE
ALPPL2	6.76295	-0.188701	0.420221	-0.449052	0.653394	0.772909	FALSE
ALS2	1639.59	0.358307	0.153721	2.33089	0.0197592	0.0621767	TRUE
ALS2CL	462.309	-0.544232	0.164688	-3.30462	0.000951056	0.00620801	TRUE
ALS2CR11	0	NA	NA	NA	NA	NA	TRUE
ALS2CR12	93.9373	0.637391	0.358782	1.77654	0.0756435	0.167954	TRUE
ALX1	91.9469	-2.31269	0.478886	-4.82931	1.37008e-06	4.12222e-05	TRUE
ALX3	6.66011	-0.51571	0.441675	-1.16762	0.242959	0.390413	TRUE
ALX4	1.11556	0.223112	0.444707	0.501705	0.615875	NA	TRUE
ALYREF	728.37	0.140996	0.0846997	1.66466	0.095981	0.200627	TRUE
AMACR	6918.37	0.765272	0.286778	2.66852	0.00761872	0.0303467	TRUE
AMBN	0	NA	NA	NA	NA	NA	TRUE
AMBP	112.844	0.63398	0.289036	2.19343	0.0282766	0.0811151	TRUE
AMBRA1	1295.91	0.207968	0.0755331	2.75334	0.00589914	0.0249992	TRUE
AMD1	3546.22	0.152035	0.145924	1.04188	0.297468	0.45023	TRUE
AMDHD1	0	NA	NA	NA	NA	NA	TRUE
AMDHD2	1048.23	0.483864	0.164197	2.94685	0.00321028	0.0156971	TRUE
AMELX	0	NA	NA	NA	NA	NA	FALSE
AMER1	105.99	0.287702	0.219302	1.31189	0.189556	0.328047	TRUE
AMER2	100.637	0.67863	0.396762	1.71042	0.0871885	0.186616	TRUE
AMER3	2.42991	0.618694	0.387179	1.59795	0.110054	0.221776	TRUE
AMFR	8046.04	0.525637	0.109471	4.80161	1.57397e-06	4.58844e-05	TRUE
AMH	1.98192	-0.234314	0.48602	-0.482107	0.62973	0.755882	TRUE
AMHR2	116.211	0.345276	0.38805	0.889772	0.373588	0.528301	TRUE
AMICA1	21.0234	-1.55008	0.394922	-3.92503	8.67175e-05	0.00103662	TRUE
AMIGO1	699.756	0.0167059	0.16455	0.101525	0.919134	0.952718	TRUE
AMIGO2	119.483	-0.577833	0.268949	-2.14849	0.0316751	0.0881379	TRUE
AMIGO3	37.7191	-0.0783621	0.216705	-0.361607	0.717645	0.820729	TRUE
AMMECR1	56.3131	-0.289319	0.221489	-1.30625	0.191469	0.33018	TRUE
AMMECR1L	2096.98	0.0894413	0.155017	0.576977	0.563955	0.701164	TRUE
AMN	5071.95	0.931995	0.283853	3.28337	0.00102575	0.00659565	TRUE
AMN1	182.272	-0.0250191	0.144133	-0.173584	0.862193	0.917993	TRUE
AMOT	1139.96	0.307295	0.253007	1.21457	0.224529	0.370354	TRUE
AMOTL1	1246.26	-0.444496	0.151404	-2.93583	0.00332658	0.0161663	TRUE
AMOTL2	2559.13	-0.205699	0.239783	-0.857854	0.390973	0.545572	TRUE
AMPD1	5.96745	0.47948	0.439362	1.09131	0.275137	0.425785	TRUE
AMPD2	1229.29	0.142437	0.0856956	1.66213	0.0964871	0.201386	TRUE
AMPD3	697.109	-0.725577	0.246108	-2.94821	0.00319623	0.0156601	TRUE
AMPH	27.3992	-0.807891	0.412474	-1.95865	0.0501543	0.12453	TRUE
AMT	3820.39	0.701184	0.293086	2.39242	0.0167377	0.0546736	TRUE
AMTN	0	NA	NA	NA	NA	NA	FALSE
AMY1A	3.22827	0.576411	0.479731	1.20153	0.229546	0.375911	TRUE
AMY2A3	0	NA	NA	NA	NA	NA	FALSE
AMZ1	97.7035	-0.845704	0.244802	-3.45464	0.000551028	0.00413415	TRUE
AMZ2	1296.97	0.055245	0.0849828	0.650073	0.515645	0.658065	TRUE
ANAPC1	1343	0.0843298	0.0974328	0.865518	0.386755	0.541502	TRUE
ANAPC10	245.997	-0.138597	0.108319	-1.27953	0.200709	0.341612	TRUE
ANAPC11	747.445	-0.0977133	0.13478	-0.724983	0.468462	0.615875	TRUE
ANAPC13	1139.03	0.126157	0.167095	0.754998	0.45025	0.600868	TRUE
ANAPC15	760.781	-0.0327855	0.131211	-0.249868	0.802689	0.880521	TRUE
ANAPC16	537.829	0.0595514	0.113887	0.5229	0.601044	0.732969	TRUE
ANAPC2	2025.44	0.17873	0.0694107	2.57497	0.010025	0.0370754	TRUE
ANAPC4	1143.4	0.157027	0.0637768	2.46213	0.0138113	0.0471715	TRUE
ANAPC5	7234.24	0.0498989	0.0839486	0.594399	0.552246	0.690726	TRUE
ANAPC7	603.202	0.168701	0.079647	2.11811	0.0341653	0.0928626	TRUE
ANDPRO	0	NA	NA	NA	NA	NA	FALSE
ANG	2.1778	0.368462	0.467433	0.788267	0.43054	0.583093	FALSE
ANG1	29.6854	0.475589	0.374778	1.26899	0.204445	0.345846	FALSE
ANG2	0	NA	NA	NA	NA	NA	FALSE
ANGEL1	565.452	0.393828	0.102569	3.83963	0.00012322	0.00135229	TRUE
ANGEL2	1011.22	0.0163189	0.0890654	0.183224	0.854622	0.913448	TRUE
ANGPT1	730.153	0.0477343	0.236978	0.201429	0.840363	0.904796	TRUE
ANGPT2	358.879	-1.42729	0.388948	-3.66963	0.0002429	0.00226765	TRUE
ANGPT4	13.5661	-0.41183	0.354142	-1.1629	0.244872	0.392628	TRUE
ANGPTL1	19.063	0.402625	0.42977	0.936839	0.348842	0.503936	TRUE
ANGPTL2	860.866	-0.232737	0.182899	-1.27249	0.2032	0.344541	TRUE
ANGPTL3	71.9485	-0.218105	0.442452	-0.492947	0.62205	0.750441	TRUE
ANGPTL4	93.2805	-1.41427	0.414311	-3.41354	0.000641237	0.00462145	TRUE
ANGPTL6	15.8204	0.390572	0.350614	1.11396	0.265294	0.415277	TRUE
ANK1	28.0703	0.200481	0.346229	0.579041	0.562562	0.699895	TRUE
ANK2	364.33	-0.967455	0.24436	-3.95914	7.52216e-05	0.000926088	TRUE
ANK3	3405.89	0.672771	0.154503	4.35443	1.33414e-05	0.000242922	TRUE
ANKAR	6.18845	-0.5461	0.486714	-1.12202	0.261856	0.41129	TRUE
ANKDD1A	4.0536	-0.81929	0.464746	-1.76288	0.077921	0.171254	TRUE
ANKDD1B	77.6823	-0.0966558	0.165455	-0.584182	0.559098	0.696716	TRUE
ANKEF1	4.61347	-0.45226	0.448093	-1.0093	0.312831	0.46623	TRUE
ANKFY1	2732.28	0.230537	0.0717705	3.21214	0.0013175	0.00798496	TRUE
ANKH	539.661	-0.39101	0.259438	-1.50714	0.131774	0.253414	TRUE
ANKHD1	1996.38	0.261354	0.130574	2.00157	0.0453306	0.115318	TRUE
ANKIB1	1871.7	0.447917	0.154047	2.90767	0.00364134	0.0173036	TRUE
ANKK1	0.116057	-0.0673637	0.260855	-0.258242	0.79622	NA	TRUE
ANKLE1	10.5949	-1.20917	0.471938	-2.56214	0.010403	0.0380728	FALSE
ANKLE2	503.122	0.221373	0.18863	1.17358	0.240563	0.387828	TRUE
ANKMY1	144.709	-0.0259582	0.304889	-0.0851397	0.93215	0.959994	TRUE
ANKMY2	1283.27	-0.107252	0.0893073	-1.20093	0.229778	0.376083	TRUE
ANKRA2	0	NA	NA	NA	NA	NA	TRUE
ANKRD1	70.7308	-0.762056	0.221996	-3.43275	0.000597492	0.0043982	TRUE
ANKRD10	602.704	-0.628017	0.15466	-4.06062	4.89426e-05	0.000665675	TRUE
ANKRD11	3079.78	0.077664	0.0783291	0.991509	0.321437	0.475461	TRUE
ANKRD12	779.118	-0.0212671	0.137513	-0.154655	0.877093	0.927873	TRUE
ANKRD13A	3182.69	-0.619033	0.209704	-2.95194	0.00315786	0.0155037	TRUE
ANKRD13B	126.195	-0.573895	0.237263	-2.41881	0.0155712	0.0517171	TRUE
ANKRD13C	4957.28	0.365021	0.138486	2.63579	0.00839416	0.0325115	TRUE
ANKRD13D	67.885	-0.59384	0.224816	-2.64145	0.00825512	0.0321352	TRUE
ANKRD16	150.836	0.472038	0.234956	2.00905	0.0445323	0.113767	TRUE
ANKRD17	2498.93	0.0843663	0.128174	0.65822	0.510397	0.653294	TRUE
ANKRD2	5.05837	0.000868118	0.485459	0.00178824	0.998573	0.999364	TRUE
ANKRD22	1.9313	-0.851719	0.457351	-1.86229	0.0625625	0.146666	TRUE
ANKRD23	21.3898	-0.661097	0.312352	-2.11651	0.0343012	0.093127	TRUE
ANKRD24	0.101413	0.0336651	0.260855	0.129056	0.897313	NA	TRUE
ANKRD26	280.462	0.427553	0.156091	2.73912	0.0061604	0.0258725	TRUE
ANKRD27	1747.33	0.366811	0.155508	2.3588	0.0183341	0.0587101	TRUE
ANKRD28	1324.09	0.235483	0.106581	2.20944	0.0271443	0.078588	TRUE
ANKRD29	30.2727	-1.1726	0.364659	-3.2156	0.00130171	0.00790061	TRUE
ANKRD32	221.265	-0.0315333	0.111821	-0.281997	0.777946	0.862412	TRUE
ANKRD33B	311.698	0.240517	0.153348	1.56844	0.11678	0.231597	TRUE
ANKRD34A	14.8244	-0.282593	0.346105	-0.816495	0.414217	0.567913	TRUE
ANKRD34B	4.19792	-1.30473	0.486705	-2.68074	0.0073459	0.0295358	FALSE
ANKRD34C	0	NA	NA	NA	NA	NA	TRUE
ANKRD35	20.0985	-0.597016	0.480193	-1.24328	0.213763	0.357026	TRUE
ANKRD36	3.0886	-0.741461	0.486212	-1.52498	0.127265	0.246727	FALSE
ANKRD37	270.939	0.660052	0.2825	2.33647	0.0194668	0.0615089	TRUE
ANKRD39	47.5635	-0.0116684	0.255819	-0.0456121	0.963619	0.978421	FALSE
ANKRD40	2753.17	0.0810837	0.077467	1.04669	0.295244	0.447948	TRUE
ANKRD42	377.648	0.476048	0.0871919	5.45978	4.76734e-08	2.62967e-06	TRUE
ANKRD44	981.506	0.00800889	0.126109	0.0635079	0.949362	0.970287	TRUE
ANKRD45	78.2135	-0.756274	0.208523	-3.62681	0.000286944	0.00254912	TRUE
ANKRD46	1540	0.124106	0.103139	1.20329	0.228865	0.375122	TRUE
ANKRD49	306.093	-0.224756	0.123154	-1.825	0.0680004	0.155779	TRUE
ANKRD50	486.733	-0.0793354	0.122721	-0.646468	0.517976	0.660242	TRUE
ANKRD52	560.742	0.488107	0.156645	3.11601	0.00183318	0.0101985	TRUE
ANKRD54	150.837	-0.337594	0.13677	-2.46833	0.0135743	0.0466072	TRUE
ANKRD55	4.00153	-0.869577	0.486559	-1.7872	0.0739056	0.165445	TRUE
ANKRD6	165.797	-1.05983	0.28341	-3.73958	0.000184326	0.00184534	TRUE
ANKRD60	1.17665	-0.135162	0.449035	-0.301006	0.76341	0.85194	FALSE
ANKRD61	9.17705	0.324484	0.420976	0.770791	0.440831	0.592042	TRUE
ANKRD63	95.5764	-0.0795436	0.266415	-0.29857	0.765268	0.853269	FALSE
ANKRD65	7.57115	0.565539	0.428738	1.31908	0.187143	0.325012	TRUE
ANKRD66	49.7344	-0.666103	0.427426	-1.5584	0.119137	0.23514	TRUE
ANKRD7	0.827041	-0.252578	0.387589	-0.651664	0.514618	NA	FALSE
ANKRD9	390.866	-0.206882	0.253418	-0.816367	0.41429	0.56792	TRUE
ANKS1A	1402.01	0.135021	0.129907	1.03936	0.298635	0.451389	TRUE
ANKS1B	3.47501	-0.510235	0.477589	-1.06836	0.28536	0.437117	TRUE
ANKS3	819.084	0.192038	0.0937981	2.04736	0.0406231	0.106158	TRUE
ANKS4B	2201.52	0.512769	0.267216	1.91893	0.054993	0.133347	TRUE
ANKS6	1362.17	0.528797	0.2123	2.49081	0.0127454	0.0445162	TRUE
ANKUB1	3.85165	-0.808702	0.456635	-1.771	0.07656	0.169335	TRUE
ANKZF1	980.334	0.163173	0.103362	1.57865	0.114416	0.228251	TRUE
ANLN	11.4071	-0.785075	0.395948	-1.98277	0.0473926	0.119305	TRUE
ANLNL1	5.11972	-1.35416	0.468044	-2.89323	0.00381297	0.0179449	FALSE
ANO1	253.901	-1.27271	0.357225	-3.56276	0.000366979	0.00304535	TRUE
ANO10	1082.15	0.139768	0.11068	1.26281	0.206657	0.348503	TRUE
ANO3	2.06427	-0.28199	0.329723	-0.855232	NA	NA	TRUE
ANO4	3.79993	-0.207578	0.486778	-0.426433	0.669792	0.78536	TRUE
ANO5	10.8018	-1.81005	0.464688	-3.8952	9.81175e-05	0.00112892	TRUE
ANO6	4064.63	0.0859696	0.124251	0.691903	0.488998	0.634127	TRUE
ANO7	13.314	0.331032	0.353256	0.937088	0.348713	0.503846	FALSE
ANO8	474.549	-0.0223885	0.137338	-0.163017	0.870505	0.923813	TRUE
ANO9	102.347	-0.127958	0.280032	-0.456941	0.647713	0.768397	TRUE
ANP32A	386.536	0.0422877	0.128172	0.329929	0.741454	0.836931	TRUE
ANP32B	2096.5	-0.114234	0.10943	-1.0439	0.29653	0.449294	TRUE
ANP32E	2383.08	0.028455	0.0814025	0.34956	0.726669	0.827516	TRUE
ANPEP	25546.4	0.684854	0.265565	2.57886	0.00991277	0.0367327	TRUE
ANTXR1	125.48	-0.244666	0.148588	-1.6466	0.0996395	0.205903	FALSE
ANTXR2	455.073	-0.740946	0.226962	-3.26463	0.00109608	0.00695452	TRUE
ANTXRL	0	NA	NA	NA	NA	NA	TRUE
ANXA1	2710.73	-1.05263	0.242046	-4.34887	1.36844e-05	0.000248097	TRUE
ANXA10	7.02795	-0.934566	0.471	-1.98422	0.0472318	0.119042	FALSE
ANXA11	5839.97	-0.0205404	0.0610455	-0.336477	0.736511	0.83393	TRUE
ANXA13	109.183	-0.228406	0.407271	-0.56082	0.57492	0.710037	TRUE
ANXA2	2681.6	-1.36818	0.293768	-4.65734	3.20314e-06	7.9979e-05	TRUE
ANXA3	706.3	-0.391125	0.15416	-2.53713	0.0111764	0.0402233	TRUE
ANXA4	3390.95	-0.477759	0.142394	-3.35518	0.000793121	0.00540893	TRUE
ANXA5	2986.31	-1.44963	0.263585	-5.49967	3.80496e-08	2.19242e-06	TRUE
ANXA6	3986.06	-0.677273	0.0932664	-7.2617	3.82249e-13	1.04064e-10	TRUE
ANXA7	1318.67	-0.750629	0.166983	-4.49524	6.94923e-06	0.000147357	TRUE
ANXA8	16.1867	-1.16183	0.480381	-2.41856	NA	NA	FALSE
ANXA9	28.5926	-0.922525	0.432238	-2.1343	0.0328184	0.0902038	TRUE
AOAH	312.997	0.483753	0.194038	2.49308	0.012664	0.044311	TRUE
AOC1	13.7146	-1.97454	0.480446	-4.1098	3.96002e-05	0.000562637	FALSE
AOC3	213.666	0.254721	0.336228	0.757584	0.4487	0.599272	TRUE
AOX1	164.574	-1.13907	0.325577	-3.49861	0.000467691	0.00366991	TRUE
AOX2	396.74	0.692274	0.277307	2.49642	0.0125455	0.0440331	FALSE
AOX3	34.7638	-1.41142	0.385537	-3.66092	0.000251311	0.00231923	FALSE
AOX4	1.75631	0.0552459	0.455699	0.121233	0.903506	0.943738	FALSE
AP1AR	800.073	0.177109	0.0959524	1.8458	0.0649211	0.150548	TRUE
AP1B1	2951.35	0.505594	0.1203	4.20276	2.63684e-05	0.000414021	TRUE
AP1G1	2267.73	0.369353	0.142408	2.59362	0.00949703	0.0355986	TRUE
AP1M1	1902.56	0.396236	0.137528	2.88114	0.00396245	0.0184554	TRUE
AP1M2	646.537	-0.541676	0.197194	-2.74692	0.00601582	0.0254156	TRUE
AP1S1	882.131	0.0788418	0.0717225	1.09926	0.271654	0.421981	FALSE
AP1S2	90.2189	-1.14925	0.246253	-4.66697	3.05678e-06	7.68934e-05	TRUE
AP1S3	535.981	-0.241255	0.0958614	-2.51671	0.0118457	0.0420578	TRUE
AP2A1	2141.09	0.38925	0.0659333	5.90369	3.55464e-09	2.98501e-07	FALSE
AP2A2	7932.2	0.59811	0.145431	4.11268	3.91094e-05	0.000557123	TRUE
AP2B1	714.078	-0.329327	0.110762	-2.9733	0.00294619	0.0147257	TRUE
AP2M1	8628.41	0.25939	0.0840074	3.0877	0.0020171	0.0109863	TRUE
AP2S1	3479.03	0.542707	0.226977	2.39103	0.0168014	0.0547908	TRUE
AP3B1	2270.94	0.331826	0.102668	3.23204	0.00122911	0.00757989	TRUE
AP3B2	18.7889	0.582456	0.455183	1.27961	0.200683	0.341612	TRUE
AP3D1	5116.51	0.387547	0.0924166	4.19348	2.74708e-05	0.000425784	TRUE
AP3M1	1242.9	0.158237	0.0795937	1.98806	0.0468053	0.118197	FALSE
AP3M2	148.085	-0.0807525	0.124493	-0.648652	0.516563	0.658937	TRUE
AP3S1	385.769	-0.227386	0.0951197	-2.39053	0.0168242	0.0548441	TRUE
AP3S2	1725.88	0.338534	0.163597	2.06931	0.0385167	0.1019	TRUE
AP4B1	738.353	0.266061	0.0682154	3.90031	9.60702e-05	0.00111371	TRUE
AP4E1	257.834	0.518737	0.17283	3.00143	0.00268715	0.0136946	TRUE
AP4M1	251.118	-0.213913	0.105372	-2.03008	0.0423488	0.109532	TRUE
AP4S1	387.323	0.119867	0.170637	0.702469	0.482387	0.628402	TRUE
AP5B1	820.073	0.0361305	0.118188	0.305703	0.759831	0.84935	TRUE
AP5M1	670.871	0.156048	0.137109	1.13813	0.255064	0.404021	TRUE
AP5S1	224.459	0.00617276	0.153936	0.0400994	0.968014	0.980829	TRUE
AP5Z1	679.786	0.103311	0.0830234	1.24436	0.213367	0.356577	TRUE
APAF1	278.581	-0.630863	0.235144	-2.68287	0.00729926	0.0294043	TRUE
APBA1	114.204	-0.168108	0.173403	-0.969467	0.332312	0.486924	TRUE
APBA2	10.4333	0.865433	0.486475	1.77898	0.0752422	0.16746	TRUE
APBA3	1116.46	0.192447	0.0942803	2.04123	0.0412284	0.107358	TRUE
APBB1	501.32	-0.107122	0.143472	-0.746641	0.45528	0.605331	TRUE
APBB1IP	174.457	-1.07274	0.378172	-2.83664	0.00455911	0.0206088	TRUE
APBB2	1744.62	0.366746	0.0846037	4.33488	1.45842e-05	0.000261324	TRUE
APBB3	327.332	-0.0553592	0.16393	-0.3377	0.735589	0.833491	TRUE
APC	1916.97	0.107551	0.123866	0.868291	0.385235	0.540273	TRUE
APC2	80.9353	-0.717527	0.244244	-2.93775	0.00330603	0.016087	TRUE
APCDD1	192.286	-1.83595	0.459496	-3.99557	6.45384e-05	0.00082744	TRUE
APCDD1L	361.589	-0.67592	0.299968	-2.25331	0.0242397	0.0724144	FALSE
APCS	2180.4	0.616133	0.431631	1.42745	0.15345	0.282097	TRUE
APEH	2215.28	0.391319	0.0865876	4.51934	6.20321e-06	0.000134064	TRUE
APEX1	1195.77	0.388058	0.204629	1.89639	0.0579079	0.138357	TRUE
APEX2	145.098	-0.0372806	0.133161	-0.279967	0.779503	0.863449	TRUE
APEX2L1	0	NA	NA	NA	NA	NA	FALSE
APH1A	2777.24	0.339762	0.094246	3.60506	0.000312084	0.0026986	TRUE
APH1B	54.2325	-0.69708	0.241783	-2.88308	0.0039381	0.0183649	FALSE
API5	3715.05	0.241076	0.0721737	3.34023	0.000837103	0.00564689	TRUE
APIP	466.159	0.383312	0.142396	2.69187	0.00710535	0.0287605	TRUE
APITD1	94.0631	-0.558916	0.193351	-2.89067	0.00384416	0.0180388	TRUE
APLF	420.487	0.179385	0.206023	0.870703	0.383916	0.539129	TRUE
APLN	124.361	-0.259766	0.356117	-0.72944	0.465732	0.613573	TRUE
APLNR	471.439	0.251912	0.214703	1.1733	0.240675	0.387962	TRUE
APLP1	909.526	0.345013	0.179198	1.92531	0.05419	0.131854	TRUE
APLP2	9844.68	-0.164683	0.117672	-1.39951	0.16166	0.292147	TRUE
APMAP	9741.25	0.560821	0.262665	2.13512	0.0327513	0.0901223	TRUE
APOA1	5.24991	0.466237	0.486466	0.958417	0.337853	0.492666	TRUE
APOA1BP	822.857	0.046348	0.114872	0.403475	0.686599	0.797732	TRUE
APOA2	0.451837	0.171533	0.261238	0.656616	0.511428	NA	TRUE
APOA4	13.549	0.475083	0.378128	1.25641	0.208968	0.351242	TRUE
APOA5	1.87698	0.0370911	0.485648	0.0763744	0.939121	0.963613	TRUE
APOB	319.232	-0.309674	0.345869	-0.89535	0.3706	0.525119	TRUE
APOBEC1	144.402	-0.0158493	0.212819	-0.074473	0.940634	0.964489	TRUE
APOBEC2	13.3562	-0.899034	0.352551	-2.55009	0.0107697	0.0390172	TRUE
APOBEC3B	31.3319	-1.3549	0.371343	-3.64865	0.000263619	0.0024039	FALSE
APOBEC4	0	NA	NA	NA	NA	NA	TRUE
APOBR	97.7191	-1.23432	0.331637	-3.72192	0.000197716	0.00195047	TRUE
APOC1	1.29002	0.17304	0.451799	0.383002	0.701718	0.809535	TRUE
APOC2	118.556	-0.184664	0.424588	-0.434925	0.663617	0.780679	TRUE
APOC3	392.375	0.766274	0.392765	1.95097	0.0510605	0.126102	TRUE
APOC4	0.67186	0.0987385	0.373287	0.264511	0.791386	NA	FALSE
APOD	5.96171	-1.69935	0.483123	-3.51744	0.000435731	0.00346593	TRUE
APOE	15040	0.0104303	0.189676	0.0549898	0.956147	0.974153	TRUE
APOF	0.20244	-0.022462	0.260855	-0.0861092	0.93138	NA	FALSE
APOH	150.432	-0.122574	0.327851	-0.373872	0.708499	0.81499	TRUE
APOL11A	496.746	0.127075	0.252757	0.502758	0.615135	0.745265	FALSE
APOL2	0	NA	NA	NA	NA	NA	TRUE
APOL3	444.546	-0.724514	0.23993	-3.01969	0.00253031	0.0130809	FALSE
APOL9A	127.85	-1.38426	0.331572	-4.17483	2.98214e-05	0.000452657	FALSE
APOLD1	217.504	0.507223	0.344757	1.47125	0.141224	0.266486	TRUE
APOM	8735.34	0.658043	0.302027	2.17875	0.02935	0.0833291	TRUE
APON	0.218221	0.0785668	0.260855	0.301189	0.76327	NA	FALSE
APOO	1045.65	0.261462	0.182321	1.43408	0.151551	0.279474	TRUE
APOOL	581.3	0.227738	0.13577	1.67738	0.0934675	0.196826	TRUE
APOPT1	829.22	-0.165534	0.125346	-1.32062	0.186627	0.324583	TRUE
APP	38878.6	0.214085	0.112619	1.90097	0.0573061	0.137299	TRUE
APPBP2	1532.56	0.0508913	0.101937	0.499243	0.617608	0.747075	TRUE
APPL1	1010.89	-0.117054	0.0990257	-1.18206	0.237183	0.384279	TRUE
APPL2	577.134	0.15314	0.128386	1.19281	0.232944	0.379633	TRUE
APRT	1662.92	-0.0142256	0.121065	-0.117504	0.906461	0.945037	TRUE
APTX	221.795	0.27431	0.0963668	2.84652	0.00442005	0.0201094	TRUE
AQP1	51242.8	0.268506	0.215329	1.24696	0.212412	0.355402	TRUE
AQP11	1055.24	1.0683	0.378875	2.81967	0.00480731	0.0214487	TRUE
AQP12A	0.966896	-0.343542	0.447406	-0.767853	0.442574	NA	TRUE
AQP2	5122.33	-0.730643	0.285775	-2.5567	0.010567	0.0384706	TRUE
AQP3	2836.52	-0.116635	0.267391	-0.436198	0.662693	0.780137	TRUE
AQP4	720.986	-1.55243	0.432775	-3.58715	0.000334315	0.00283706	TRUE
AQP5	14.6305	-0.142435	0.340539	-0.418265	0.675754	0.789073	TRUE
AQP6	1310.29	-0.0642239	0.373578	-0.171916	0.863504	0.918752	TRUE
AQP7	2060.84	0.727596	0.178828	4.0687	4.72759e-05	0.000649813	TRUE
AQP8	9.43704	0.182047	0.449396	0.405094	0.685408	0.796851	TRUE
AQP9	2.69894	-0.464079	0.484631	-0.957592	0.338269	0.493027	TRUE
AQPEP	4.73947	-1.03682	0.485827	-2.13414	0.032831	0.0902147	TRUE
AQR	1024.01	0.160247	0.0980247	1.63477	0.102098	0.209751	TRUE
AR	193.48	0.516876	0.27576	1.87437	0.0608794	0.143678	TRUE
ARAF	2016.49	0.382363	0.126718	3.01744	0.00254918	0.0131462	TRUE
ARAP1	1436.09	-0.40628	0.145204	-2.798	0.00514209	0.0225907	TRUE
ARAP2	426.864	0.374931	0.0917768	4.08524	4.40305e-05	0.000612936	TRUE
ARAP3	831.402	-0.178831	0.121041	-1.47744	0.139558	0.264259	TRUE
ARC	188.936	-0.127996	0.352244	-0.363373	0.716327	0.81972	FALSE
ARCN1	4897.99	0.108527	0.0798145	1.35975	0.17391	0.308603	TRUE
AREG	17.5169	-0.984225	0.368052	-2.67415	0.00749195	0.0299945	TRUE
AREL1	2284.64	0.172536	0.0802115	2.15102	0.0314749	0.0876531	TRUE
ARF1	10551.9	0.210263	0.0734916	2.86105	0.00422239	0.0193984	TRUE
ARF2	622.841	-0.0560341	0.0993906	-0.563777	0.572906	0.709002	FALSE
ARF3	5337.71	0.0640349	0.0398291	1.60774	0.107891	0.218803	TRUE
ARF4	4860.71	0.234812	0.07982	2.94176	0.00326348	0.0159111	TRUE
ARF5	2458.43	0.0376988	0.13175	0.286139	0.774772	0.860014	TRUE
ARF6	1575.76	-0.139484	0.0998803	-1.39651	0.16256	0.293334	TRUE
ARFGAP1	1282.04	0.126181	0.114104	1.10585	0.268792	0.418923	TRUE
ARFGAP2	2544.21	0.195748	0.110623	1.76951	0.0768095	0.169695	TRUE
ARFGAP3	1098.23	0.0769047	0.103213	0.745104	0.456209	0.606088	TRUE
ARFGEF1	2890.43	0.187429	0.10836	1.72969	0.0836853	0.180838	TRUE
ARFGEF2	3067.07	0.302394	0.13872	2.17989	0.0292654	0.0832019	TRUE
ARFIP1	1060.88	0.234027	0.0742356	3.1525	0.00161881	0.00927492	TRUE
ARFIP2	1306.79	-0.0298776	0.0679134	-0.439937	0.659983	0.778629	TRUE
ARFRP1	889.993	-0.0957724	0.0897923	-1.0666	0.286153	0.438162	TRUE
ARG1	18.4595	-0.248794	0.400013	-0.621964	0.533966	0.674607	TRUE
ARG2	702.677	-0.462392	0.276768	-1.67068	0.0947843	0.198815	TRUE
ARGLU1	1094.38	-0.0894416	0.0820211	-1.09047	0.275506	0.426237	TRUE
ARHGAP1	2138.72	0.232748	0.0858345	2.71159	0.00669611	0.0275332	TRUE
ARHGAP10	1105.06	0.439659	0.228448	1.92455	0.0542863	0.132031	TRUE
ARHGAP11A	85.826	-1.0628	0.340132	-3.12465	0.00178015	0.0099957	TRUE
ARHGAP12	862.558	-0.0856202	0.0738939	-1.15869	0.246582	0.394436	TRUE
ARHGAP15	49.2014	-1.14745	0.317494	-3.61408	0.000301419	0.00263064	TRUE
ARHGAP17	3663.74	0.413245	0.1364	3.02966	0.00244832	0.0127784	TRUE
ARHGAP18	1420.13	-0.070033	0.124827	-0.561041	0.574769	0.709975	TRUE
ARHGAP19	43.4963	-0.865956	0.317932	-2.72372	0.00645517	0.0267905	TRUE
ARHGAP20	85.0429	-1.5446	0.281323	-5.4905	4.00797e-08	2.27028e-06	TRUE
ARHGAP21	1382.02	0.104358	0.13487	0.773769	0.439067	0.590472	TRUE
ARHGAP22	361.242	-0.883545	0.328545	-2.68927	0.00716093	0.0289438	TRUE
ARHGAP23	431.366	-0.357741	0.141822	-2.52247	0.0116534	0.0415499	TRUE
ARHGAP24	9069.16	0.165209	0.0872777	1.89291	0.0583692	0.139091	TRUE
ARHGAP25	162.353	-0.994734	0.268871	-3.69968	0.000215875	0.00208572	TRUE
ARHGAP26	798.666	0.0887975	0.122772	0.723275	0.469511	0.616962	TRUE
ARHGAP27	1503.54	0.00363127	0.0624497	0.058147	0.953632	0.973	TRUE
ARHGAP28	278.741	0.0291188	0.162256	0.179462	0.857575	0.915274	TRUE
ARHGAP29	2596.67	-0.245888	0.160944	-1.52778	0.126566	0.245722	TRUE
ARHGAP30	283.582	-1.35562	0.323763	-4.18706	2.82585e-05	0.000435048	TRUE
ARHGAP31	346.321	-0.120033	0.179558	-0.668491	0.50382	0.647429	TRUE
ARHGAP32	1156.03	0.470311	0.112957	4.16364	3.13214e-05	0.000469515	TRUE
ARHGAP33	41.8071	-0.469294	0.234714	-1.99943	0.0455619	0.115767	TRUE
ARHGAP35	4886.11	0.183977	0.101313	1.81594	0.06938	0.15806	TRUE
ARHGAP36	4.78465	-1.72225	0.467326	-3.68532	0.000228417	0.00217179	TRUE
ARHGAP39	248.731	-0.121354	0.146262	-0.829703	0.406707	0.560561	TRUE
ARHGAP4	241.136	-1.08134	0.299438	-3.61123	0.000304743	0.00265415	TRUE
ARHGAP40	4.55584	-0.851787	0.461124	-1.8472	0.0647188	0.150177	FALSE
ARHGAP42	1345.43	0.231403	0.120553	1.91952	0.0549188	0.133186	TRUE
ARHGAP44	106.748	-0.0694189	0.220684	-0.314563	0.753094	0.844672	TRUE
ARHGAP5	1751.12	0.0677063	0.20338	0.332906	0.739206	0.835647	TRUE
ARHGAP6	147.302	-0.712322	0.118548	-6.00872	1.86997e-09	1.76331e-07	TRUE
ARHGAP8	778.196	0.246598	0.191915	1.28493	0.198816	0.339485	TRUE
ARHGAP9	235.775	-0.737497	0.333079	-2.21418	0.0268163	0.0778389	TRUE
ARHGDIA	8423.79	-0.165668	0.0855887	-1.93563	0.0529133	0.129684	TRUE
ARHGDIB	1097.54	-1.42952	0.24552	-5.82241	5.80067e-09	4.57521e-07	FALSE
ARHGDIG	1.09838	-0.160235	0.415698	-0.385459	0.699897	NA	TRUE
ARHGEF1	1791.01	-0.397584	0.143081	-2.77873	0.00545713	0.0235578	TRUE
ARHGEF10	691.192	-0.295509	0.200626	-1.47293	0.140769	0.265866	TRUE
ARHGEF10L	1839.82	-0.112311	0.102973	-1.09069	0.27541	0.426168	TRUE
ARHGEF11	1821.28	0.277024	0.0852919	3.24795	0.00116238	0.00725584	TRUE
ARHGEF12	3197.8	0.279874	0.128857	2.17197	0.029858	0.0843364	TRUE
ARHGEF15	1265.86	0.293183	0.205056	1.42977	0.152782	0.281345	TRUE
ARHGEF16	1019.57	0.213797	0.121574	1.75857	0.07865	0.172398	TRUE
ARHGEF17	2521.59	0.112445	0.118834	0.946237	0.344028	0.499043	TRUE
ARHGEF18	1925.84	0.145192	0.11715	1.23937	0.215209	0.358732	TRUE
ARHGEF19	82.1227	0.0303772	0.27061	0.112254	0.910622	0.947544	TRUE
ARHGEF2	814.613	-0.537213	0.155435	-3.45619	0.000547876	0.0041192	TRUE
ARHGEF25	158.533	-1.26802	0.210878	-6.01304	1.82076e-09	1.73258e-07	TRUE
ARHGEF26	269.448	0.0209932	0.107371	0.195519	0.844986	0.90821	TRUE
ARHGEF28	2275.1	0.369893	0.1695	2.18226	0.0290901	0.0828432	TRUE
ARHGEF3	1087.81	-0.192045	0.104714	-1.83399	0.0666555	0.153511	TRUE
ARHGEF33	16.8356	0.119028	0.321737	0.369953	0.711418	0.816793	TRUE
ARHGEF37	149.692	-1.32033	0.406944	-3.24451	0.00117653	0.00731979	TRUE
ARHGEF38	56.3724	-0.628796	0.358789	-1.75255	0.0796791	0.174075	TRUE
ARHGEF39	6.62536	-1.23367	0.475638	-2.59373	0.00949422	0.0355959	TRUE
ARHGEF4	1309.36	-0.0588101	0.100695	-0.584043	0.559191	0.696781	TRUE
ARHGEF40	759.923	-0.628773	0.186526	-3.37097	0.00074905	0.00518165	TRUE
ARHGEF5	1992.83	0.424733	0.111372	3.81364	0.000136936	0.00147603	TRUE
ARHGEF6	178.165	-1.1609	0.2975	-3.90219	9.53249e-05	0.00110736	TRUE
ARHGEF7	956.943	0.475801	0.136086	3.49631	0.000471735	0.0036846	TRUE
ARHGEF9	168.271	-0.025129	0.242483	-0.103632	0.917461	0.951686	TRUE
ARID1A	2937.44	-0.0207914	0.0885294	-0.234853	0.814323	0.888262	TRUE
ARID1B	1343.27	-0.0271296	0.0895644	-0.302906	0.761961	0.850717	TRUE
ARID2	1114.11	-0.0109967	0.119815	-0.0917811	0.926872	0.956978	TRUE
ARID3A	189.514	0.0320546	0.180302	0.177782	0.858894	0.916041	TRUE
ARID3B	211.619	-0.0274999	0.338344	-0.0812778	0.935221	0.961305	TRUE
ARID3C	0.137243	-0.0673637	0.260855	-0.258242	0.79622	NA	TRUE
ARID4A	664.362	0.123693	0.126226	0.979935	0.327118	0.481489	TRUE
ARID4B	3.31726	0.355129	0.475815	0.74636	0.45545	0.605461	TRUE
ARID5A	117.839	-1.05093	0.251904	-4.17194	3.02019e-05	0.000456789	TRUE
ARID5B	402.242	-0.340871	0.206328	-1.65208	0.0985175	0.204159	TRUE
ARIH1	2337.57	0.137104	0.0873833	1.569	0.116648	0.231452	TRUE
ARIH2	1713.81	0.315698	0.093567	3.37403	0.000740766	0.00513486	TRUE
ARL1	1317.21	-0.22325	0.106126	-2.10363	0.035411	0.095449	TRUE
ARL10	278.395	-0.10227	0.104905	-0.974882	0.329619	0.484132	TRUE
ARL11	65.9981	-1.15267	0.386833	-2.97976	0.00288472	0.0144742	TRUE
ARL13A	3.2466	0.0574961	0.484915	0.118569	0.905617	0.944784	FALSE
ARL13B	287.507	0.00203716	0.126984	0.0160426	0.9872	0.992847	TRUE
ARL14	8.9092	0.491971	0.399596	1.23117	0.218258	0.362881	TRUE
ARL14EP	586.365	-0.21835	0.083896	-2.60263	0.00925115	0.0349173	TRUE
ARL14EPL	0.726568	-0.215677	0.418866	-0.514907	0.606618	NA	TRUE
ARL15	1239.51	0.0123969	0.207313	0.0597979	0.952317	0.971991	TRUE
ARL16	312.009	0.0786638	0.14339	0.548601	0.58328	0.71707	TRUE
ARL2	747.965	0.0272152	0.141309	0.192594	0.847277	0.909387	TRUE
ARL2BP	4002.13	0.109815	0.143974	0.762742	0.445617	0.596171	TRUE
ARL3	1696.58	0.146823	0.189851	0.773362	0.439308	0.590655	TRUE
ARL4A	335.735	-0.382062	0.111395	-3.42981	0.000604011	0.0044288	TRUE
ARL4C	215.189	-0.996762	0.255604	-3.89964	9.63368e-05	0.00111451	TRUE
ARL4D	471.448	0.0717219	0.230739	0.310836	0.755926	0.846707	TRUE
ARL5A	658.32	0.379507	0.155568	2.4395	0.0147078	0.0496108	TRUE
ARL5B	484.722	-0.134727	0.141499	-0.952146	0.341023	0.496004	TRUE
ARL5C	13.8715	-1.46035	0.424486	-3.44028	0.000581109	0.00430388	FALSE
ARL6	502.665	-0.058496	0.0939363	-0.622719	0.533469	0.674327	TRUE
ARL6IP1	7925.43	0.935099	0.201399	4.64302	3.43348e-06	8.48517e-05	TRUE
ARL6IP4	975.534	0.183423	0.138183	1.32739	0.18438	0.321936	FALSE
ARL6IP5	579.115	0.167977	0.0955208	1.75854	0.0786563	0.172398	TRUE
ARL6IP6	371.826	0.116351	0.129821	0.896245	0.370122	0.524806	TRUE
ARL8A	1188.57	0.0742748	0.0729936	1.01755	0.308891	0.46205	TRUE
ARL8B	3230.9	0.185499	0.088461	2.09696	0.0359974	0.0967053	TRUE
ARL9	0.901856	0.114303	0.416576	0.274388	0.783787	NA	FALSE
ARMC1	1174.3	0.615864	0.176515	3.48901	0.000484809	0.00375441	TRUE
ARMC10	585.331	0.108778	0.0822349	1.32277	0.185913	0.323554	TRUE
ARMC12	0	NA	NA	NA	NA	NA	TRUE
ARMC2	16.7548	-0.519721	0.368713	-1.40955	0.158671	0.288383	TRUE
ARMC3	45.1991	-0.0336466	0.296459	-0.113495	0.909638	0.946946	TRUE
ARMC4	0.359829	-0.110531	0.304007	-0.363581	0.716171	NA	TRUE
ARMC5	960.656	-0.04054	0.069113	-0.586576	0.557489	0.6954	TRUE
ARMC6	86.9873	0.252429	0.209231	1.20646	0.22764	0.373623	TRUE
ARMC7	210.091	-0.192871	0.110555	-1.74457	0.0810591	0.176359	TRUE
ARMC8	946.053	0.34821	0.0977045	3.56391	0.000365367	0.00303495	TRUE
ARMC9	635.566	0.0465892	0.0898721	0.518395	0.604183	0.735627	TRUE
ARMCX1	0	NA	NA	NA	NA	NA	TRUE
ARMCX2	129.77	-0.895777	0.172178	-5.20262	1.96494e-07	8.85015e-06	TRUE
ARMCX3	542.33	-0.248126	0.196893	-1.26021	0.207594	0.349733	TRUE
ARMCX4	284.276	-0.510253	0.186322	-2.73856	0.00617096	0.0259104	TRUE
ARMCX6	47.791	0.0160458	0.282216	0.0568566	0.954659	0.973578	TRUE
ARNT	802.212	0.184184	0.138033	1.33435	0.18209	0.318728	TRUE
ARNT2	1606.08	-0.0490587	0.255844	-0.191752	0.847936	0.909542	TRUE
ARNTL	989.621	-0.336478	0.100663	-3.34262	0.000829922	0.00561453	TRUE
ARNTL2	2.94051	-0.562506	0.48684	-1.15542	0.247918	0.396044	FALSE
ARPC1A	3968.56	0.31606	0.124292	2.54288	0.0109942	0.0396738	TRUE
ARPC1B	3627.58	-0.62391	0.201141	-3.10186	0.00192309	0.0105871	TRUE
ARPC2	6635.71	-0.00124632	0.0836198	-0.0149046	0.988108	0.993405	TRUE
ARPC3	2149.61	-0.114124	0.111779	-1.02098	0.307264	0.46035	TRUE
ARPC4	2181.34	-0.217956	0.10439	-2.08791	0.0368063	0.0982841	TRUE
ARPC5	2792.14	-0.121627	0.0818949	-1.48516	0.137503	0.261216	TRUE
ARPC5L	2438.42	0.196024	0.119975	1.63387	0.102286	0.21001	TRUE
ARPP19	1886.21	0.0286654	0.104609	0.274024	0.784066	0.866723	TRUE
ARPP21	14.4176	-1.22355	0.388963	-3.14566	0.0016571	0.00944619	TRUE
ARR3	2.91403	0.0615194	0.48688	0.126354	0.899452	0.941743	FALSE
ARRB1	2163.28	-0.657305	0.233885	-2.81038	0.00494824	0.0219389	TRUE
ARRB2	373.703	-0.832027	0.220367	-3.77564	0.0001596	0.00165269	TRUE
ARRDC1	721.103	-0.248809	0.121712	-2.04424	0.0409299	0.106712	TRUE
ARRDC2	130.324	-0.820126	0.299804	-2.73554	0.00622773	0.0260839	TRUE
ARRDC3	2519.86	-0.461724	0.257622	-1.79225	0.0730922	0.164124	TRUE
ARRDC4	344.527	-0.505996	0.231855	-2.18238	0.0290812	0.0828432	TRUE
ARRDC5	0.174314	0.0785668	0.260855	0.301189	0.76327	NA	FALSE
ARSA	1728.45	0.0938797	0.162685	0.577066	0.563895	0.701141	TRUE
ARSB	1252.8	0.703306	0.157785	4.45737	8.29696e-06	0.000167718	TRUE
ARSE	376.641	-0.543239	0.167252	-3.24803	0.00116206	0.00725584	TRUE
ARSG	157.513	-0.670406	0.284762	-2.35427	0.0185594	0.0592292	TRUE
ARSI	3.57632	-1.6203	0.476058	-3.40358	0.000665081	0.00475654	FALSE
ARSJ	3.79619	-0.270582	0.472519	-0.572639	0.566889	0.703568	TRUE
ARSK	364.148	-0.0259948	0.116519	-0.223095	0.823461	0.893666	TRUE
ART1	0.272489	0.0224397	0.260855	0.0860234	0.931448	NA	TRUE
ART2B	24.0295	-0.590668	0.398865	-1.48087	0.138641	0.262934	FALSE
ART3	76.0149	-1.08536	0.456766	-2.37618	0.0174929	0.056542	TRUE
ART4	40.5682	-1.86247	0.403399	-4.61694	3.89434e-06	9.27116e-05	TRUE
ART5	0.222586	-0.022462	0.260855	-0.0861092	0.93138	NA	TRUE
ARTN	12.5777	-0.691871	0.367343	-1.88345	0.0596399	0.141445	TRUE
ARV1	212.52	-0.0339569	0.142594	-0.238136	0.811775	0.886399	TRUE
ARVCF	1310.06	0.0561686	0.172844	0.324967	0.745206	0.839038	TRUE
ARX	0.514331	-0.201814	0.312348	-0.64612	0.518202	NA	TRUE
ARXES2	0.998621	-0.582156	0.354137	-1.64387	0.100203	NA	FALSE
AS3MT	1319.83	0.489893	0.210767	2.32433	0.0201076	0.0629796	TRUE
ASAH1	1942.89	-0.292768	0.120008	-2.43956	0.0147051	0.0496108	TRUE
ASAH2	603.569	0.0561251	0.180198	0.311463	0.755449	0.846357	TRUE
ASAP1	476.597	0.00852187	0.177922	0.0478966	0.961799	0.977669	TRUE
ASAP2	906.084	-0.0580222	0.15338	-0.378291	0.705214	0.812457	TRUE
ASB1	272.16	-0.346082	0.142591	-2.42711	0.0152198	0.0508099	TRUE
ASB10	0.473785	-0.0702263	0.363317	-0.193292	0.84673	NA	TRUE
ASB11	8.40311	-0.18091	0.458978	-0.394159	0.693464	0.803102	TRUE
ASB12	0.451626	-0.195363	0.311288	-0.627596	0.530268	NA	TRUE
ASB13	1718.15	0.683735	0.207381	3.29699	0.000977262	0.00633944	TRUE
ASB14	8.51867	-0.368871	0.375643	-0.981973	0.326113	0.48053	TRUE
ASB15	35.7518	0.265163	0.463617	0.571944	0.56736	0.703997	TRUE
ASB16	0.216496	-0.123491	0.260855	-0.473408	0.635922	NA	FALSE
ASB17	0.345772	0.0224397	0.260855	0.0860234	0.931448	NA	FALSE
ASB18	0	NA	NA	NA	NA	NA	FALSE
ASB2	63.6527	0.084845	0.340564	0.249131	0.80326	0.880747	TRUE
ASB3	217.408	0.0160506	0.146975	0.109207	0.913039	0.948731	TRUE
ASB4	2.44758	-0.453715	0.48302	-0.939329	0.347562	0.502742	FALSE
ASB5	39.0202	0.00919925	0.244524	0.037621	0.96999	0.981543	FALSE
ASB6	533.009	0.139132	0.0931862	1.49305	0.135424	0.258286	TRUE
ASB7	178.473	0.492005	0.153714	3.20079	0.00137052	0.00820899	TRUE
ASB8	1192.82	0.179115	0.102172	1.75308	0.0795876	0.17392	TRUE
ASB9	255.998	-0.0730968	0.168834	-0.43295	0.665051	0.781607	FALSE
ASCC1	723.188	0.282105	0.152496	1.84992	0.064325	0.149575	TRUE
ASCC2	677.262	0.223099	0.103347	2.15873	0.0308711	0.0863992	TRUE
ASCC3	951.03	0.187781	0.12038	1.5599	0.118783	0.234605	TRUE
ASCL1	0.25405	-0.022462	0.260855	-0.0861092	0.93138	NA	TRUE
ASCL2	2.70664	-0.328616	0.482252	-0.681418	0.495607	0.640091	TRUE
ASCL3	24.1304	-1.46657	0.435777	-3.36542	0.000764284	0.00527406	TRUE
ASCL4	57.2591	0.608789	0.254235	2.3946	0.0166387	0.0544377	FALSE
ASCL5	0	NA	NA	NA	NA	NA	FALSE
ASF1A	471.696	0.0691371	0.10253	0.674314	0.500112	0.644233	TRUE
ASF1B	15.1585	-1.06692	0.454872	-2.34554	0.0189996	0.0603831	TRUE
ASGR1	295.396	0.763895	0.277364	2.75412	0.00588493	0.0249515	TRUE
ASGR2	128.377	0.222312	0.382908	0.580588	0.561518	0.698958	TRUE
ASH1L	2556.19	-0.0407668	0.164846	-0.247302	0.804675	0.881562	TRUE
ASH2L	1013.31	-0.0694425	0.084819	-0.818714	0.41295	0.566666	TRUE
ASIC1	241.118	0.174821	0.171905	1.01696	0.309171	0.462254	TRUE
ASIC2	106.122	-1.45085	0.232932	-6.22865	4.70469e-10	5.49595e-08	TRUE
ASIC3	0.72892	0.203784	0.324858	0.627301	0.530462	NA	TRUE
ASIC4	7.58249	-0.482583	0.426744	-1.13085	0.258119	0.407557	TRUE
ASIC5	0.116057	-0.0673637	0.260855	-0.258242	0.79622	NA	TRUE
ASIP	0	NA	NA	NA	NA	NA	FALSE
ASL	5801.92	0.835748	0.3125	2.67439	0.00748656	0.02998	TRUE
ASMT	19.6742	0.283788	0.372447	0.761956	0.446086	0.596679	FALSE
ASMTL	566.649	-0.0398814	0.129134	-0.308837	0.757446	0.847511	TRUE
ASNA1	2147.49	0.363499	0.149044	2.43887	0.0147334	0.0496674	TRUE
ASNS	242.615	-1.0517	0.249858	-4.2092	2.56282e-05	0.000405795	TRUE
ASNSD1	911.68	0.0750177	0.0851225	0.881291	0.37816	0.532491	TRUE
ASPA	3722.07	0.637523	0.2757	2.31238	0.0207566	0.0644145	TRUE
ASPDH	1822.78	0.675377	0.275412	2.45224	0.014197	0.0482666	TRUE
ASPG	2412.98	-0.226739	0.344335	-0.658483	0.510228	0.653147	TRUE
ASPH	816.556	-0.0578161	0.149633	-0.386387	0.69921	0.807579	TRUE
ASPHD1	1.26448	0.298074	0.456245	0.65332	0.51355	0.656285	TRUE
ASPHD2	0.529944	-0.257682	0.261852	-0.984075	0.325079	NA	TRUE
ASPM	88.1927	-0.273744	0.255178	-1.07276	0.283381	0.434874	TRUE
ASPN	80.2922	-1.51392	0.41176	-3.6767	0.000236272	0.00222174	TRUE
ASPSCR1	1095.91	0.238062	0.154323	1.54262	0.122922	0.24027	TRUE
ASRGL1	3873.8	0.324831	0.204832	1.58584	0.112775	0.225993	TRUE
ASS1	31915.7	0.794379	0.342546	2.31905	0.0203925	0.0636592	TRUE
ASTE1	58.6222	0.0343598	0.198425	0.173163	0.862523	0.918158	TRUE
ASTL	5.75656	-0.0182776	0.439133	-0.0416221	0.9668	0.980392	TRUE
ASTN1	83.0544	-1.22479	0.30748	-3.9833	6.79637e-05	0.000859939	TRUE
ASTN2	26.4707	-0.612044	0.380576	-1.60821	0.10779	0.218677	TRUE
ASUN	670.058	0.0547889	0.0788031	0.695263	0.486891	0.632123	TRUE
ASXL1	1039.97	-0.0176799	0.0923116	-0.191524	0.848115	0.909542	TRUE
ASXL2	992.8	0.177934	0.125955	1.41268	0.157749	0.287232	TRUE
ASZ1	0.116808	0.0336651	0.260855	0.129056	0.897313	NA	TRUE
ATAD1	1785.9	0.146116	0.141612	1.0318	0.302164	0.455101	TRUE
ATAD2	179.423	-0.810422	0.273948	-2.95831	0.0030933	0.0152755	TRUE
ATAD2B	77.767	0.0853521	0.252975	0.337394	0.73582	0.833597	TRUE
ATAD3A	1354.92	0.412457	0.151338	2.72541	0.00642226	0.0266998	TRUE
ATAD5	87.5447	0.0533437	0.218812	0.243787	0.807395	0.883684	TRUE
ATAT1	175.351	-0.269914	0.188423	-1.43249	0.152003	0.280063	TRUE
ATCAY	3.299	0.0460842	0.485804	0.0948616	0.924425	0.955606	TRUE
ATE1	1233.66	0.0249318	0.128925	0.193382	0.84666	0.90914	TRUE
ATF1	1097.24	0.0298342	0.107697	0.277019	0.781766	0.865047	TRUE
ATF2	606.818	0.316805	0.163829	1.93375	0.0531433	0.13002	TRUE
ATF3	128.534	-1.58541	0.392917	-4.03498	5.46066e-05	0.000728044	TRUE
ATF4	3925.3	-0.0740326	0.0831251	-0.890616	0.373135	0.527881	TRUE
ATF5	833.986	-0.507814	0.105647	-4.80672	1.53426e-06	4.51162e-05	TRUE
ATF6	3240.65	0.576346	0.108236	5.32488	1.0102e-07	5.06228e-06	TRUE
ATF6B	1300.89	0.105107	0.0960924	1.09381	0.274039	0.424592	TRUE
ATF7	1224.54	-0.148425	0.0636583	-2.33159	0.019722	0.0621061	TRUE
ATF7IP	1529.13	-0.166603	0.120549	-1.38204	0.166959	0.299225	TRUE
ATF7IP2	15.4632	-0.825987	0.460352	-1.79425	0.072773	0.163625	TRUE
ATG10	238.325	0.148494	0.125385	1.18431	0.23629	0.383336	TRUE
ATG12	1673.96	0.229277	0.128036	1.79072	0.0733388	0.164481	TRUE
ATG13	1116.72	0.122313	0.100999	1.21104	0.225881	0.371894	TRUE
ATG14	404.671	-0.0691726	0.116529	-0.593608	0.552774	0.691191	TRUE
ATG16L1	658.538	-0.0366208	0.0864636	-0.42354	0.671901	0.78637	TRUE
ATG16L2	180.688	-0.509922	0.166047	-3.07096	0.00213375	0.0114517	TRUE
ATG2A	1377.27	0.152187	0.0785197	1.9382	0.0525985	0.129099	TRUE
ATG3	1218.31	0.0351638	0.103867	0.338546	0.734952	0.833294	TRUE
ATG4A	27.2956	0.205693	0.297512	0.691377	0.489328	0.634418	TRUE
ATG4AL1	211.716	0.219298	0.124162	1.76622	0.0773587	0.170439	FALSE
ATG4B	926.887	-0.0286528	0.0612814	-0.467561	0.640098	0.762935	TRUE
ATG4C	369.388	0.220804	0.108634	2.03254	0.0420986	0.109002	TRUE
ATG4D	833.565	0.196803	0.0850239	2.31468	0.0206305	0.0641772	TRUE
ATG5	1071.06	0.0847284	0.130174	0.650886	0.51512	0.657544	TRUE
ATG7	833.185	0.21443	0.107888	1.98752	0.0468645	0.118329	TRUE
ATG9A	2082.5	0.314534	0.074281	4.23438	2.29186e-05	0.000374123	TRUE
ATG9B	1.90628	-0.0264694	0.469604	-0.0563653	0.955051	0.973801	TRUE
ATHL1	790.643	-0.0347652	0.154852	-0.224507	0.822363	0.892877	TRUE
ATIC	662.423	0.115658	0.102313	1.13043	0.258295	0.407721	TRUE
ATL1	50.8567	-0.166494	0.225643	-0.737863	0.460598	0.609759	TRUE
ATL2	1357.67	0.420568	0.127408	3.30095	0.00096359	0.00626519	TRUE
ATL3	967.43	0.127315	0.199479	0.638237	0.523319	0.665344	TRUE
ATM	798.55	-0.158996	0.156433	-1.01639	0.309445	0.462493	TRUE
ATMIN	885.423	0.188524	0.173637	1.08573	0.277597	0.428296	TRUE
ATN1	0	NA	NA	NA	NA	NA	TRUE
ATOH1	0	NA	NA	NA	NA	NA	TRUE
ATOH7	0.104265	0.0336651	0.260855	0.129056	0.897313	NA	TRUE
ATOH8	99.9311	-0.984077	0.212666	-4.62734	3.70393e-06	8.9185e-05	TRUE
ATOX1	1347.04	0.194286	0.188299	1.03179	0.30217	0.455101	TRUE
ATP10A	256.369	-0.767375	0.191138	-4.01478	5.9502e-05	0.000776747	TRUE
ATP10B	74.5047	-0.804501	0.419646	-1.91709	0.0552259	0.1337	TRUE
ATP10D	485.221	-0.437047	0.180464	-2.42179	0.0154441	0.051386	TRUE
ATP11A	15440	0.332348	0.258057	1.28788	0.197786	0.338138	TRUE
ATP11B	1135.98	0.0955535	0.100339	0.952311	0.340939	0.496004	TRUE
ATP11C	557.408	0.298198	0.123757	2.40955	0.0159722	0.0526862	TRUE
ATP12A	18.7319	0.265773	0.486227	0.546601	0.584653	0.718587	TRUE
ATP13A1	1504.86	0.239954	0.0561676	4.2721	1.93638e-05	0.000325539	TRUE
ATP13A2	805.175	-0.297833	0.136554	-2.18107	0.029178	0.0829956	TRUE
ATP13A3	78.1564	0.705877	0.278241	2.53692	0.0111832	0.040239	TRUE
ATP13A4	0.116057	-0.0673637	0.260855	-0.258242	0.79622	NA	TRUE
ATP13A5	0.57958	0.287492	0.374822	0.76701	0.443076	NA	TRUE
ATP1A1	99267.3	0.160458	0.186706	0.859415	0.390111	0.544729	TRUE
ATP1A2	81.1319	-0.525115	0.192269	-2.73115	0.00631147	0.0263626	FALSE
ATP1A3	24.1573	-1.71287	0.458001	-3.73988	0.000184106	0.00184423	TRUE
ATP1A4	40.5167	0.536347	0.458219	1.1705	0.241799	0.389135	TRUE
ATP1B1	62468.7	0.0306336	0.167914	0.182436	0.855241	0.913716	TRUE
ATP1B2	424.159	-0.608581	0.195711	-3.10958	0.00187351	0.0103716	TRUE
ATP1B3	3452.49	-0.415465	0.202051	-2.05624	0.0397597	0.104501	TRUE
ATP1B4	6.41484	0.917958	0.460333	1.99412	0.0461395	0.116953	TRUE
ATP2A1	81.7082	-0.558392	0.381562	-1.46344	0.143348	0.269109	TRUE
ATP2A2	7819.04	0.613978	0.14797	4.14934	3.33435e-05	0.000490675	TRUE
ATP2A3	618.237	-0.143138	0.13552	-1.05621	0.290873	0.442989	TRUE
ATP2B1	1858.22	0.329496	0.124265	2.65157	0.00801191	0.0314715	TRUE
ATP2B2	162.125	-0.55807	0.254415	-2.19354	0.0282683	0.0811048	TRUE
ATP2B3	62.4311	-1.19636	0.406315	-2.94442	0.00323564	0.0158073	TRUE
ATP2B4	402.761	0.179224	0.334791	0.535331	0.592421	0.725376	TRUE
ATP2C1	2139.36	-0.148147	0.205789	-0.719896	0.471589	0.61897	TRUE
ATP2C2	29.0109	-0.352934	0.434466	-0.81234	0.416597	0.570063	TRUE
ATP4A	4.16627	-0.287602	0.484653	-0.593417	0.552902	0.69124	FALSE
ATP4B	0.0981752	-0.0673637	0.260855	-0.258242	0.79622	NA	FALSE
ATP5A1	62045.3	0.584978	0.171281	3.41531	0.000637103	0.00460343	TRUE
ATP5B	91591.6	0.305368	0.178607	1.70972	0.0873178	0.186822	TRUE
ATP5C1	14073.1	0.395814	0.176249	2.24577	0.0247188	0.0733781	TRUE
ATP5D	7391.84	0.26976	0.150454	1.79297	0.072978	0.163955	TRUE
ATP5E	4886.52	0.165232	0.199824	0.826887	0.408301	0.562268	TRUE
ATP5F1	9.55147	-0.0327453	0.394929	-0.0829144	0.93392	0.960828	TRUE
ATP5G1	3605.05	0.221704	0.204847	1.08229	0.279123	0.430022	FALSE
ATP5G2	6359.98	0.101409	0.165839	0.61149	0.540876	0.680692	TRUE
ATP5G3	15900.9	0.517242	0.174263	2.96817	0.00299577	0.0149073	TRUE
ATP5H	7431.22	0.178025	0.18478	0.963446	0.335324	0.489825	FALSE
ATP5HL1	3.92641	0.219076	0.469939	0.46618	0.641087	0.763432	FALSE
ATP5I	3649.77	0.145603	0.201122	0.723956	0.469093	0.616605	TRUE
ATP5J	5137.84	0.108296	0.172165	0.629023	0.529334	0.670869	TRUE
ATP5J2	5022.34	0.280469	0.215274	1.30285	0.192627	0.331703	TRUE
ATP5L	8740.19	0.393957	0.178727	2.20424	0.0275072	0.0793936	TRUE
ATP5O	10286	0.323454	0.207244	1.56073	0.118586	0.234409	TRUE
ATP5S	575.222	-0.318198	0.119645	-2.65951	0.00782542	0.0309769	TRUE
ATP5SL	1325.55	0.0717501	0.152399	0.470804	0.637781	0.761269	TRUE
ATP6AP1	4507.85	0.202273	0.111695	1.81095	0.070149	0.159274	TRUE
ATP6AP1L	0.825694	-0.309612	0.275464	-1.12397	0.261027	NA	TRUE
ATP6AP2	2397.62	0.268498	0.204619	1.31219	0.189457	0.327917	TRUE
ATP6V0A1	1298.08	0.023836	0.0570344	0.417924	0.676003	0.789145	TRUE
ATP6V0A2	516.117	0.41035	0.157734	2.60154	0.00928071	0.0349976	TRUE
ATP6V0A4	13701.9	0.659135	0.251015	2.62588	0.00864244	0.0331838	TRUE
ATP6V0B	1245.4	0.387144	0.158291	2.44577	0.0144542	0.0489805	TRUE
ATP6V0C	15539.2	0.458633	0.178784	2.5653	0.0103088	0.0378265	TRUE
ATP6V0D1	8171.55	0.397253	0.155085	2.56151	0.0104217	0.0381214	TRUE
ATP6V0D2	1025.75	-0.179187	0.261115	-0.68624	0.492562	0.637524	TRUE
ATP6V0E1	2977.15	0.0838973	0.0832317	1.008	0.313456	0.466851	TRUE
ATP6V0E2	2277.54	0.828765	0.171283	4.83857	1.30775e-06	3.96293e-05	TRUE
ATP6V1A	9842.54	0.533454	0.172728	3.08841	0.00201233	0.0109703	TRUE
ATP6V1B1	2818.88	0.0389336	0.328958	0.118354	0.905787	0.944801	TRUE
ATP6V1B2	11748.9	0.798575	0.196611	4.06169	4.87187e-05	0.000663698	TRUE
ATP6V1C1	2632.7	0.385341	0.117091	3.29095	0.000998487	0.00644985	TRUE
ATP6V1C2	569.964	0.247197	0.299831	0.824455	0.409681	0.563892	TRUE
ATP6V1D	2803.21	0.283936	0.110493	2.56972	0.0101781	0.0375271	TRUE
ATP6V1E1	4998.5	0.198187	0.142196	1.39376	0.16339	0.294517	TRUE
ATP6V1E2	2.72401	-0.86569	0.48537	-1.78357	0.0744939	0.166386	FALSE
ATP6V1F	2231.71	0.0809921	0.199953	0.405056	0.685436	0.796851	FALSE
ATP6V1G1	4795.3	0.0919581	0.118824	0.773901	0.438989	0.590414	TRUE
ATP6V1G2	36.3058	-1.22994	0.263168	-4.67358	2.95992e-06	7.47911e-05	TRUE
ATP6V1G3	2242.98	-0.215895	0.293051	-0.736715	0.461295	0.610029	TRUE
ATP6V1H	2751.71	0.286626	0.111611	2.56808	0.0102264	0.0376307	TRUE
ATP7A	635.072	-0.0369044	0.168275	-0.21931	0.826408	0.89554	TRUE
ATP7B	404.168	0.731854	0.16587	4.4122	1.02323e-05	0.000196263	TRUE
ATP8A1	1207.81	0.022899	0.142221	0.16101	0.872085	0.924793	TRUE
ATP8B1	765.375	-0.0725638	0.181582	-0.399619	0.689437	0.800014	TRUE
ATP8B2	2743.46	0.256047	0.0905224	2.82855	0.00467591	0.0209962	TRUE
ATP8B3	1.82885	-0.610521	0.453455	-1.34637	0.178182	0.313873	TRUE
ATP8B4	71.6783	-1.31577	0.386148	-3.40742	0.000655798	0.00470981	TRUE
ATP8B5P	167.618	0.224522	0.168202	1.33483	0.181931	0.318516	FALSE
ATP9A	1729.07	-0.360378	0.239598	-1.50409	0.132557	0.254427	TRUE
ATP9B	645.843	0.12952	0.1448	0.894471	0.37107	0.525576	TRUE
ATPAF1	1855.17	0.255325	0.150537	1.69609	0.0898689	0.190901	TRUE
ATPAF2	668.661	0.232046	0.153471	1.51198	0.130538	0.251409	TRUE
ATPIF1	3207.94	0.217969	0.198655	1.09723	0.272542	0.423011	TRUE
ATR	437.325	0.323463	0.092195	3.50846	0.000450707	0.00355822	TRUE
ATRAID	754.078	0.325826	0.115918	2.81083	0.00494135	0.0219199	TRUE
ATRIP	97.4495	-0.0184917	0.199622	-0.0926336	0.926195	0.956688	TRUE
ATRN	3116	0.130648	0.113879	1.14726	0.251275	0.399894	TRUE
ATRNL1	5291.91	0.570937	0.160822	3.55011	0.000385065	0.00315971	TRUE
ATRX	2139.87	-0.0143359	0.124321	-0.115314	0.908197	0.946003	TRUE
ATXN1	271.855	0.485046	0.196248	2.4716	0.0134509	0.046306	TRUE
ATXN10	2279.51	0.00203723	0.141268	0.014421	0.988494	0.993503	TRUE
ATXN1L	2037.78	0.180455	0.115547	1.56175	0.118348	0.234074	TRUE
ATXN2	1714.43	0.25604	0.129053	1.98399	0.0472565	0.119087	TRUE
ATXN2L	1895.75	0.0484763	0.0997324	0.486064	0.626922	0.754118	TRUE
ATXN3	796.555	-0.0505242	0.0897284	-0.563079	0.573381	0.709369	TRUE
ATXN7	931.307	0.206866	0.120117	1.72221	0.085032	0.183068	TRUE
ATXN7L2	105.204	-0.389166	0.245278	-1.58663	0.112597	0.225688	TRUE
ATXN7L3	1335.57	-0.18608	0.0760902	-2.44552	0.0144642	0.048995	TRUE
ATXN7L3B	2540.15	0.0976274	0.0827706	1.17949	0.238202	0.385332	TRUE
ATXN7L4	346.198	-0.22145	0.161148	-1.3742	0.169378	0.302597	FALSE
AUH	2054.79	0.338341	0.19735	1.71442	0.0864513	0.185378	TRUE
AUNIP	2.82456	-0.0896869	0.47849	-0.187438	0.851318	0.911301	FALSE
AUP1	2242.27	0.141403	0.108395	1.30452	0.192056	0.330957	TRUE
AURKA	229.593	-0.551919	0.203963	-2.70598	0.00681028	0.0278871	TRUE
AURKAIP1	1553.89	0.27229	0.147395	1.84735	0.0646962	0.150166	TRUE
AURKB	129.985	-0.0868856	0.227704	-0.381573	0.702778	0.810315	TRUE
AURKC	83.1639	-0.211912	0.22196	-0.954731	0.339714	0.494569	FALSE
AVEN	312.088	0.119743	0.139498	0.858385	0.39068	0.545343	TRUE
AVGR1	0	NA	NA	NA	NA	NA	FALSE
AVIL	37.5764	-0.133537	0.305769	-0.436724	0.662312	0.780001	TRUE
AVL9	1464.25	0.389491	0.125191	3.11117	0.00186349	0.0103296	TRUE
AVP	0.214983	-0.022462	0.260855	-0.0861092	0.93138	NA	FALSE
AVPI1	571.023	-0.26387	0.112567	-2.34412	0.0190718	0.0605327	TRUE
AVPR1A	101.984	-0.568983	0.312309	-1.82186	0.0684767	0.156509	TRUE
AVPR1B	0	NA	NA	NA	NA	NA	FALSE
AVPR2	571.159	-0.523054	0.287722	-1.81791	0.0690772	0.157484	TRUE
AWAT1	0.436056	0.099607	0.304822	0.326771	0.743841	NA	TRUE
AWAT2	0.768298	0.201421	0.417255	0.482729	0.629288	NA	TRUE
AXIN1	1481.19	0.134975	0.10837	1.2455	0.212948	0.355947	TRUE
AXIN2	149.926	-1.40958	0.337673	-4.17439	2.98783e-05	0.000452887	TRUE
AXL	618.696	-1.13356	0.254477	-4.45446	8.41049e-06	0.000169146	TRUE
AZGP1	602.728	-0.470112	0.31629	-1.48633	0.137191	0.260771	TRUE
AZI1	531.314	-0.0705483	0.11069	-0.63735	0.523897	0.665677	TRUE
AZI2	852.428	-0.01505	0.114503	-0.131438	0.895429	0.939805	TRUE
AZIN1	1984.56	0.0377872	0.105843	0.357012	0.721083	0.823488	TRUE
B2M	25890.7	-0.103549	0.134099	-0.772182	0.440007	0.591406	TRUE
B3GALNT1	494.051	-0.385764	0.225678	-1.70936	0.0873844	0.186883	TRUE
B3GALNT2	647.411	0.209325	0.100132	2.09049	0.0365736	0.0977709	TRUE
B3GALT1	1.98794	-0.618186	0.478151	-1.29287	0.196056	0.335929	TRUE
B3GALT2	161.688	0.425891	0.461321	0.923199	0.355904	0.510786	TRUE
B3GALT4	100.736	0.088319	0.167609	0.526934	0.598239	0.73034	FALSE
B3GALT5	1377.65	0.265257	0.271054	0.978615	0.32777	0.48213	TRUE
B3GALT6	138.005	-0.0547827	0.166391	-0.32924	0.741974	0.837166	TRUE
B3GALTL	534.529	0.0978471	0.10704	0.914114	0.360657	0.51563	TRUE
B3GAT1	160.501	-0.412954	0.322655	-1.27986	0.200594	0.341519	TRUE
B3GAT2	4.07623	-0.100307	0.484242	-0.207142	0.835899	0.901606	TRUE
B3GAT3	1470.56	0.217851	0.0902825	2.413	0.015822	0.0522725	TRUE
B3GNT1	0	NA	NA	NA	NA	NA	TRUE
B3GNT2	857.507	-0.234197	0.142854	-1.63941	0.101128	0.208215	TRUE
B3GNT3	2.96145	-1.09492	0.469574	-2.33174	NA	NA	TRUE
B3GNT4	1.89913	-0.481562	0.468303	-1.02831	0.303803	0.456786	FALSE
B3GNT5	5.09481	-1.24445	0.48641	-2.55843	0.0105147	0.0383566	TRUE
B3GNT6	4.74656	-0.0565581	0.48069	-0.11766	0.906337	0.945037	TRUE
B3GNT7	381.331	-0.0666248	0.187673	-0.355005	0.722586	0.824312	TRUE
B3GNT8	23.4638	-0.213965	0.297774	-0.718546	0.472421	0.61958	TRUE
B3GNT9	261.846	-0.357426	0.142784	-2.50326	0.0123056	0.0433989	TRUE
B3GNTL1	85.7694	-0.377639	0.200987	-1.87893	0.0602547	0.142562	TRUE
B4GALNT1	304.588	-0.107004	0.241636	-0.442833	0.657886	0.776645	TRUE
B4GALNT3	13.2751	-1.36933	0.486815	-2.81283	NA	NA	TRUE
B4GALNT4	46.9375	-2.16105	0.42574	-5.07599	3.85493e-07	1.5274e-05	TRUE
B4GALT1	390.623	-0.292033	0.23944	-1.21965	0.222597	0.368318	TRUE
B4GALT2	47.8657	-0.119292	0.23468	-0.508318	0.61123	0.74164	TRUE
B4GALT3	1245.72	0.140837	0.0758617	1.8565	0.0633829	0.148094	TRUE
B4GALT4	97.5367	-0.523506	0.155194	-3.37324	0.000742891	0.00514748	TRUE
B4GALT5	340.233	-0.401551	0.21246	-1.89	0.0587574	0.139843	TRUE
B4GALT6	670.827	-0.430722	0.146461	-2.94087	0.00327295	0.0159496	TRUE
B4GALT7	426.216	0.0376365	0.10665	0.352898	0.724165	0.825668	TRUE
B9D1	0	NA	NA	NA	NA	NA	TRUE
B9D2	198.944	0.0328467	0.137062	0.239648	0.810603	0.885798	TRUE
BAALC	36.2998	-0.524696	0.228332	-2.29796	0.0215643	0.0664206	TRUE
BAAT	163.23	-0.0145388	0.381629	-0.0380966	0.969611	0.981473	TRUE
BABAM1	1489.52	0.153136	0.10174	1.50516	0.132283	0.254064	TRUE
BACE1	437.744	0.330086	0.174308	1.8937	0.0582655	0.138966	TRUE
BACE2	149.161	-1.48758	0.303089	-4.90808	9.19731e-07	3.00273e-05	TRUE
BACH1	203.295	0.195587	0.134713	1.45188	0.146535	0.273299	TRUE
BAD	498.34	-0.000773184	0.125938	-0.00613942	0.995101	0.997402	TRUE
BAG1	1370.1	-0.0797881	0.0677208	-1.17819	0.23872	0.385903	TRUE
BAG2	251.977	-0.213696	0.0923258	-2.31459	0.0206356	0.0641807	TRUE
BAG3	1552.59	0.612069	0.24196	2.52963	0.0114182	0.0409015	TRUE
BAG4	316.354	-0.452175	0.235341	-1.92137	0.0546856	0.132771	TRUE
BAG5	896.635	-0.153961	0.0830856	-1.85305	0.0638758	0.148917	TRUE
BAG6	2999.07	0.088316	0.054931	1.60776	0.107887	0.218803	TRUE
BAHCC1	701.833	0.0187374	0.10824	0.17311	0.862565	0.918158	TRUE
BAHD1	1508.63	0.400924	0.113923	3.51924	0.000432778	0.00344878	TRUE
BAI1	64.691	-0.398878	0.283049	-1.40922	0.158769	0.288499	TRUE
BAI2	12.2974	-0.576946	0.348122	-1.65731	0.0974565	0.202682	TRUE
BAI3	0.233616	0.0785668	0.260855	0.301189	0.76327	NA	TRUE
BAIAP2	664.524	0.00607953	0.132325	0.045944	0.963355	0.978367	TRUE
BAIAP2L1	363.214	-0.0442531	0.12309	-0.359519	0.719207	0.822013	TRUE
BAIAP2L2	1437.65	0.52984	0.16095	3.29196	0.000994911	0.00643167	TRUE
BAK1	472.118	-0.585967	0.202155	-2.8986	0.00374835	0.0177073	TRUE
BAMBI	966.984	0.459021	0.21979	2.08846	0.0367566	0.0981668	FALSE
BANF1	1646.42	-0.0622954	0.138593	-0.449484	0.653082	0.77283	TRUE
BANF2	0	NA	NA	NA	NA	NA	FALSE
BANK1	15.474	-1.59702	0.373575	-4.27497	1.9116e-05	0.00032266	TRUE
BANP	418.051	-0.327859	0.130992	-2.50289	0.0123185	0.043435	TRUE
BAP1	1867.07	0.240416	0.0831255	2.8922	0.00382553	0.0179764	TRUE
BARD1	24.8853	0.0526021	0.301876	0.174251	0.861668	0.917667	TRUE
BARHL1	0.987141	0.298584	0.422937	0.705977	0.480203	NA	FALSE
BARHL2	0	NA	NA	NA	NA	NA	TRUE
BARX1	0	NA	NA	NA	NA	NA	TRUE
BARX2	153.369	0.224679	0.431566	0.520614	0.602636	0.734308	TRUE
BASP1	766.915	0.455722	0.257539	1.76953	0.0768057	0.169695	TRUE
BATF	16.9421	-1.86072	0.425471	-4.37331	1.22375e-05	0.000227486	TRUE
BATF2	11.7202	-0.875412	0.400662	-2.18491	0.0288954	0.0824138	TRUE
BATF3	5.75312	-0.516026	0.486802	-1.06003	0.28913	0.44133	TRUE
BAX	434.667	-0.0837291	0.125556	-0.666868	0.504856	0.648366	TRUE
BAZ1A	485.902	-0.202056	0.174121	-1.16043	0.245873	0.393719	TRUE
BAZ1B	2874.55	0.179317	0.0844788	2.12263	0.0337852	0.0921202	TRUE
BAZ2A	1371.86	0.0961324	0.132885	0.723424	0.469419	0.616938	TRUE
BAZ2B	796.627	0.0942531	0.143866	0.655143	0.512376	0.655181	TRUE
BBC3	97.2252	-1.29773	0.325872	-3.98234	6.82393e-05	0.000862134	TRUE
BBOX1	4.96006	0.243479	0.484211	0.502837	0.615079	0.745265	TRUE
BBS1	1039.59	0.287173	0.114958	2.49807	0.0124873	0.043902	TRUE
BBS10	246.605	0.262656	0.0967549	2.71465	0.00663456	0.0273333	TRUE
BBS12	66.3103	-0.226089	0.224013	-1.00927	0.312846	0.46623	TRUE
BBS2	1314.76	0.241009	0.136329	1.76785	0.077086	0.170114	TRUE
BBS4	543.577	0.0728217	0.10207	0.713448	0.475568	0.622138	TRUE
BBS5	193.302	0.13206	0.114499	1.15336	0.248761	0.39709	TRUE
BBS7	597.553	0.453053	0.135604	3.34099	0.000834795	0.00563846	TRUE
BBS9	464.684	-0.00881487	0.0825014	-0.106845	0.914912	0.94994	TRUE
BBX	144.808	0.483139	0.229763	2.10277	0.0354858	0.0956202	TRUE
BCAM	4573.18	-0.470439	0.216858	-2.16934	0.0300566	0.0846954	TRUE
BCAN	0.451814	-0.196026	0.311745	-0.628801	0.529479	NA	TRUE
BCAP29	470.631	-0.173162	0.115005	-1.50569	0.132147	0.253928	TRUE
BCAP31	3212.53	0.169731	0.0638181	2.6596	0.00782326	0.0309756	TRUE
BCAR1	4804.2	0.52227	0.201581	2.59087	0.00957325	0.0357968	TRUE
BCAR3	554.846	-0.464117	0.128881	-3.60113	0.000316842	0.00272717	TRUE
BCAS1	0.805548	-0.291711	0.268615	-1.08598	0.277487	NA	TRUE
BCAS2	909.309	0.146564	0.0961173	1.52484	0.127298	0.24673	TRUE
BCAS3	820.605	0.304031	0.101011	3.00988	0.00261349	0.0134087	TRUE
BCAT1	104.996	-1.76606	0.465884	-3.79078	0.000150173	0.0015793	TRUE
BCAT2	1832.43	-0.163478	0.179066	-0.912948	0.36127	0.516223	FALSE
BCCIP	449.332	0.229006	0.122058	1.87621	0.0606258	0.14324	TRUE
BCDIN3D	74.8706	-0.185561	0.164951	-1.12494	0.260613	0.410073	TRUE
BCHE	14.2865	-0.119867	0.364745	-0.328632	0.742434	0.837166	TRUE
BCKDHA	6521.84	0.497706	0.169722	2.93248	0.00336266	0.0162864	TRUE
BCKDHB	3511.12	0.119056	0.174271	0.683168	0.494501	0.639083	TRUE
BCKDK	4087.12	0.459681	0.174214	2.6386	0.00832495	0.0323202	TRUE
BCL10	780.365	-0.268083	0.111984	-2.39394	0.0166686	0.0545145	TRUE
BCL11A	5.18583	-1.06703	0.486904	-2.19146	0.0284188	0.0813571	TRUE
BCL11B	63.2758	-1.75294	0.343943	-5.09661	3.45794e-07	1.41324e-05	TRUE
BCL2	80.0492	-0.287807	0.24125	-1.19298	0.232876	0.379596	TRUE
BCL2A1	88.5541	-1.43096	0.405393	-3.52981	0.000415859	0.00335041	FALSE
BCL2L1	1178.25	0.170295	0.120285	1.41576	0.156847	0.286332	TRUE
BCL2L10	1.48346	-0.21478	0.463649	-0.463238	0.643194	0.764809	FALSE
BCL2L11	21.7983	-0.449757	0.380118	-1.18321	0.236728	0.383909	TRUE
BCL2L12	114.721	-0.168	0.242698	-0.692218	0.488801	0.633944	TRUE
BCL2L13	658.176	0.144519	0.126869	1.13912	0.254653	0.403519	TRUE
BCL2L14	117.801	0.101912	0.239778	0.425025	0.670818	0.785745	TRUE
BCL2L15	26.3731	0.389606	0.325528	1.19684	0.231367	0.377757	TRUE
BCL2L2	2278.73	0.231553	0.102227	2.26509	0.023507	0.0708896	FALSE
BCL3	204.69	-0.929137	0.307277	-3.02378	0.00249639	0.0129532	TRUE
BCL6	1141.02	0.720608	0.37469	1.92321	0.0544531	0.13238	TRUE
BCL6B	302.146	-0.371781	0.251671	-1.47725	0.139608	0.264293	TRUE
BCL7B	1359.14	0.32712	0.141043	2.3193	0.0203789	0.0636311	TRUE
BCL7C	558.31	0.122848	0.165426	0.742618	0.457713	0.607322	TRUE
BCL9	465.997	-0.150464	0.0893233	-1.68449	0.0920877	0.19461	TRUE
BCL9L	1339.17	0.0435471	0.0971892	0.448065	0.654106	0.773535	TRUE
BCLAF1	2452.97	0.0669366	0.0787384	0.850114	0.395261	0.549693	TRUE
BCMO1	29.4162	1.14404	0.329019	3.47712	0.000506832	0.00388163	TRUE
BCO2	35.3386	-0.343943	0.310434	-1.10794	0.267886	0.417887	TRUE
BCOR	740.752	-0.0410221	0.0886998	-0.462482	0.643735	0.76513	TRUE
BCORL1	557.253	-0.256158	0.114931	-2.22881	0.0258269	0.0758142	TRUE
BCR	913.029	-0.530767	0.146555	-3.62163	0.000292749	0.00258556	TRUE
BCS1L	217.042	0.169804	0.147889	1.14819	0.250892	0.39949	TRUE
BDH1	1055.42	0.0422758	0.208416	0.202843	0.839258	0.904067	TRUE
BDH2	2936.07	0.671594	0.295665	2.27147	0.0231188	0.0699698	TRUE
BDKRB1	0.333593	-0.179618	0.260855	-0.688573	0.491092	NA	FALSE
BDKRB2	51.3514	-1.56937	0.365658	-4.29191	1.77143e-05	0.000304592	TRUE
BDNF	8.19847	-1.74629	0.485938	-3.59364	0.000326091	0.00278231	TRUE
BDP1	34.0763	0.216211	0.275826	0.783867	0.433118	0.584801	TRUE
BEAN1	41.4632	-1.77129	0.369736	-4.79067	1.66222e-06	4.82072e-05	TRUE
BECN1	2230.49	0.144237	0.0622185	2.31823	0.020437	0.0637368	TRUE
BEGAIN	41.3793	-1.4918	0.411746	-3.62311	0.000291078	0.00257501	TRUE
BEND3	250.682	0.366039	0.146285	2.50224	0.012341	0.0434873	TRUE
BEND4	104.165	0.0377555	0.197488	0.191178	0.848386	0.909605	TRUE
BEND5	716.698	0.301924	0.237229	1.27271	0.203121	0.344508	TRUE
BEND6	31.051	-1.16854	0.391635	-2.98375	0.00284741	0.0143338	TRUE
BEND7	289.486	0.719408	0.173295	4.15135	3.30521e-05	0.000487237	TRUE
BEST1	42.6752	-0.0175999	0.217674	-0.080854	0.935558	0.96144	TRUE
BEST2	0.73782	-0.204982	0.418246	-0.490098	0.624065	NA	TRUE
BEST3	10.2301	0.0778173	0.353236	0.220298	0.825639	0.894981	TRUE
BEST4	0	NA	NA	NA	NA	NA	FALSE
BET1	714.204	-0.127947	0.0947472	-1.3504	0.176888	0.312236	TRUE
BET1L	560.787	0.0691744	0.0845578	0.818072	0.413316	0.566953	TRUE
BEX1	14.0342	-1.04864	0.406447	-2.58001	0.00987982	0.0366428	FALSE
BEX2	133.829	0.362554	0.302906	1.19692	0.231338	0.377746	TRUE
BEX4	130.447	-1.07858	0.147979	-7.28873	3.12883e-13	8.65764e-11	FALSE
BFAR	830.075	0.152363	0.0857551	1.77672	0.0756145	0.167934	TRUE
BFSP1	24.1757	-0.19475	0.265994	-0.732159	0.464071	0.612245	TRUE
BFSP2	47.6902	0.253126	0.476511	0.531206	0.595276	0.72767	TRUE
BGLAP	1.53557	-0.503268	0.4746	-1.0604	0.288961	0.441152	TRUE
BGN	6276.15	-1.6137	0.253786	-6.35852	2.03702e-10	2.68616e-08	TRUE
BHLHA15	11.0008	-1.1292	0.413421	-2.73135	0.00630746	0.0263524	TRUE
BHLHA9	0.116057	-0.0673637	0.260855	-0.258242	0.79622	NA	TRUE
BHLHB9	510.557	0.206124	0.0904454	2.27899	0.0226674	0.0688879	TRUE
BHLHE22	48.5388	-1.73968	0.370699	-4.69298	2.69257e-06	6.94923e-05	TRUE
BHLHE23	0.797822	-0.548724	0.347182	-1.58051	0.113991	NA	FALSE
BHLHE40	1866.39	0.301293	0.147859	2.0377	0.0415797	0.108006	TRUE
BHLHE41	186.939	-0.297287	0.28926	-1.02775	0.304068	0.457145	TRUE
BHMT	2576.4	0.495602	0.382989	1.29404	0.195652	0.335475	TRUE
BHMT2	10902.9	0.69883	0.256513	2.72435	0.00644288	0.0267509	TRUE
BICC1	3606.5	-0.205891	0.135043	-1.52463	0.127352	0.246794	TRUE
BICD1	65.1849	-0.128042	0.207211	-0.61793	0.536622	0.677105	TRUE
BICD2	1536.2	-0.251852	0.10003	-2.51778	0.0118099	0.0419484	TRUE
BID	602.226	0.211445	0.085744	2.466	0.013663	0.0468215	TRUE
BIK	25.4367	-1.42009	0.375518	-3.78168	0.000155772	0.00162401	TRUE
BIN1	1005.2	0.368047	0.218245	1.68639	0.09172	0.194003	TRUE
BIN2	562.351	-0.510992	0.146459	-3.48896	0.000484899	0.00375441	TRUE
BIN2A	0.255564	-0.123491	0.260855	-0.473408	0.635922	NA	FALSE
BIN3	742.437	0.156174	0.132909	1.17505	0.239976	0.387167	TRUE
BIRC2	711.466	-0.15867	0.0955963	-1.65979	0.0969572	0.201917	TRUE
BIRC3	186.166	-1.63213	0.381845	-4.27432	1.91718e-05	0.000323278	TRUE
BIRC5	38.9772	-0.77381	0.332833	-2.32492	0.0200763	0.0629399	TRUE
BIRC6	4554.33	0.398844	0.13282	3.00288	0.00267435	0.0136458	TRUE
BIRC7	0	NA	NA	NA	NA	NA	FALSE
BLCAP	2018.55	0.235181	0.130837	1.79751	0.0722543	0.162763	TRUE
BLES03	1175.77	-0.00698846	0.138234	-0.0505553	0.95968	0.976456	FALSE
BLK	14.8059	-1.51762	0.441591	-3.43671	0.000588827	0.00434959	TRUE
BLM	126.483	0.288398	0.132835	2.17109	0.0299241	0.0844912	TRUE
BLMH	1199.78	0.574738	0.124156	4.62915	3.67171e-06	8.86622e-05	TRUE
BLNK	601.896	-0.652425	0.196384	-3.32219	0.000893143	0.00593285	TRUE
BLOC1S1	1262.29	0.246877	0.175433	1.40724	0.159356	0.289315	FALSE
BLOC1S2	568.434	-0.151057	0.190524	-0.792853	0.427863	0.580797	TRUE
BLOC1S3	366.803	0.332696	0.15514	2.14448	0.0319941	0.0887183	TRUE
BLOC1S4	416.479	0.0156585	0.133778	0.117049	0.906822	0.94518	TRUE
BLOC1S5	976.702	0.0162187	0.140089	0.115774	0.907831	0.94594	TRUE
BLOC1S6	1036.11	0.179271	0.0859804	2.08502	0.0370675	0.0988095	TRUE
BLVRA	2253.56	0.555784	0.191153	2.90753	0.00364299	0.0173065	TRUE
BLVRB	736.059	0.33136	0.127561	2.59766	0.00938626	0.0352931	TRUE
BLZF1	303.391	0.00690911	0.119438	0.0578468	0.953871	0.973085	TRUE
BMF	920.94	-0.722458	0.19359	-3.73191	0.000190035	0.00189081	TRUE
BMI1	509.964	0.237218	0.149491	1.58684	0.11255	0.225621	TRUE
BMP1	368.622	-0.693739	0.217534	-3.18911	0.00142711	0.00843256	TRUE
BMP10	1.7797	-0.31811	0.474713	-0.67011	0.502788	0.646465	TRUE
BMP15	38.982	0.272328	0.39416	0.690907	0.489624	0.634646	FALSE
BMP2	38.8361	-0.455167	0.317054	-1.43561	0.151113	0.278955	TRUE
BMP2K	1562.1	0.358371	0.111863	3.20365	0.00135695	0.00815828	TRUE
BMP3	89.0502	-0.255308	0.444887	-0.573872	NA	NA	TRUE
BMP4	887.393	0.180424	0.136913	1.31781	0.187569	0.325483	TRUE
BMP5	7.68434	-0.796201	0.457374	-1.74081	0.0817171	0.177517	TRUE
BMP6	202.281	-1.09879	0.187788	-5.8512	4.88034e-09	3.96035e-07	TRUE
BMP7	2653.97	0.639851	0.167032	3.83072	0.00012777	0.00139228	TRUE
BMP8A	0	NA	NA	NA	NA	NA	TRUE
BMP8B	0.966762	-0.78779	0.433771	-1.81614	0.0693486	NA	TRUE
BMPER	1.94399	-0.0385321	0.471917	-0.0816501	0.934925	0.961235	TRUE
BMPR1A	1252.36	0.221856	0.183564	1.2086	0.226816	0.372936	TRUE
BMPR1B	184.047	-0.351289	0.341358	-1.02909	0.303436	0.456316	TRUE
BMPR2	2686.29	-0.123631	0.100448	-1.2308	0.218398	0.362881	FALSE
BMS1	890.645	-0.106536	0.0643635	-1.65523	0.0978779	0.203258	TRUE
BMX	11.4301	-0.418953	0.337525	-1.24125	0.214514	0.357961	TRUE
BMYC	265.709	-0.313375	0.213547	-1.46748	0.142246	0.267691	FALSE
BNC1	2.1026	-1.25482	0.464016	-2.70425	0.00684587	0.0279853	TRUE
BNC2	1201.15	0.676975	0.42708	1.58512	0.112938	0.226211	TRUE
BNIP1	293.084	-0.0111874	0.148224	-0.0754763	0.939836	0.963994	TRUE
BNIP2	1227.31	-0.626391	0.150801	-4.15375	3.27075e-05	0.000483847	TRUE
BNIP3	4002.84	0.235613	0.196424	1.19951	0.230329	0.376715	TRUE
BNIP3L	3559.74	0.131794	0.0832499	1.58311	0.113396	0.226887	FALSE
BNIPL	4.12441	-1.00236	0.477472	-2.09931	0.0357896	0.096285	TRUE
BOC	395.31	-0.622265	0.19454	-3.19864	0.00138078	0.00825201	TRUE
BOD1	520.637	0.168877	0.131551	1.28374	0.199235	0.339891	TRUE
BOD1L1	1121.85	-0.0965307	0.112337	-0.859295	0.390178	0.544732	TRUE
BOK	577.081	-0.743571	0.379912	-1.95722	0.0503216	0.124817	TRUE
BOLA1	506.921	0.230805	0.189886	1.21549	0.224179	0.370012	TRUE
BOLA2	0.214232	-0.123491	0.260855	-0.473408	0.635922	NA	TRUE
BOLA3	824.682	0.428509	0.228575	1.8747	0.0608345	0.143612	TRUE
BOLL	0	NA	NA	NA	NA	NA	TRUE
BOP1	664.212	0.303804	0.0727458	4.17624	2.96371e-05	0.000450265	TRUE
BORA	119.284	-0.319092	0.161262	-1.97871	0.0478481	0.120129	TRUE
BPGM	1117.73	-0.053106	0.095869	-0.553943	0.579618	0.714323	TRUE
BPHL	3300.16	0.680882	0.283399	2.40255	0.016281	0.0534957	TRUE
BPI	30.0942	0.934883	0.437356	2.13758	0.0325511	0.0897076	TRUE
BPIFA1	0	NA	NA	NA	NA	NA	TRUE
BPIFA2	0	NA	NA	NA	NA	NA	TRUE
BPIFA2F	0	NA	NA	NA	NA	NA	FALSE
BPIFA3	0	NA	NA	NA	NA	NA	TRUE
BPIFA5	0	NA	NA	NA	NA	NA	FALSE
BPIFA6	0.19635	-0.123491	0.260855	-0.473408	0.635922	NA	FALSE
BPIFB1	1.05989	-0.339503	0.286056	-1.18684	0.23529	NA	TRUE
BPIFB2	0	NA	NA	NA	NA	NA	FALSE
BPIFB3	0	NA	NA	NA	NA	NA	TRUE
BPIFB4	2.30132	-1.53948	0.47993	-3.20771	0.00133796	0.00807416	FALSE
BPIFB5	0	NA	NA	NA	NA	NA	FALSE
BPIFB6	2.16725	0.0703232	0.485405	0.144875	0.884809	0.932875	TRUE
BPIFC	1.32546	-0.551953	0.474959	-1.16211	0.245193	0.392881	TRUE
BPNT1	2027.5	0.394616	0.155205	2.54255	0.0110047	0.0396933	TRUE
BPTF	1594.04	-0.0198789	0.120998	-0.164291	0.869502	0.923097	TRUE
BRAF	691.849	0.289737	0.0823495	3.51838	0.000434184	0.00345688	TRUE
BRAP	2234.02	0.239078	0.0837295	2.85536	0.00429884	0.019696	TRUE
BRAT1	453.964	-0.0928828	0.0793009	-1.17127	0.24149	0.388756	TRUE
BRCA1	48.4691	-0.601685	0.244399	-2.4619	0.0138204	0.0471929	TRUE
BRCA2	92.766	-0.587035	0.289813	-2.02556	0.0428094	0.110436	TRUE
BRCC3	2092.95	0.265004	0.121286	2.18495	0.0288926	0.0824138	TRUE
BRD1	1487.92	0.122078	0.103681	1.17743	0.239023	0.386295	TRUE
BRD2	0	NA	NA	NA	NA	NA	TRUE
BRD3	1126.42	0.109801	0.075659	1.45126	0.146708	0.273538	TRUE
BRD4	2121.37	0.0174387	0.0688703	0.25321	0.800106	0.878773	TRUE
BRD7	1205.17	0.000684578	0.0508221	0.0134701	0.989253	0.993864	TRUE
BRD8	1007.81	-0.0527057	0.0575813	-0.915326	0.36002	0.514982	TRUE
BRD9	684.296	-0.0225024	0.0739469	-0.304305	0.760896	0.849865	TRUE
BRDT	0	NA	NA	NA	NA	NA	TRUE
BRE	1210.24	0.395932	0.121326	3.26338	0.00110092	0.00697322	TRUE
BRF1	1093.08	0.402461	0.0889485	4.52465	6.04961e-06	0.000131587	TRUE
BRF2	222.984	-0.254137	0.128821	-1.97279	0.04852	0.121527	TRUE
BRI3	3135.69	0.305672	0.208719	1.46452	0.143053	0.268704	TRUE
BRI3BP	291.446	0.141153	0.277333	0.508966	0.610776	0.741195	TRUE
BRINP1	19.2768	0.0995296	0.429476	0.231747	0.816735	0.889742	TRUE
BRINP2	8.57455	-1.47796	0.478048	-3.09166	0.0019904	0.010876	TRUE
BRINP3	3.71669	0.285951	0.484603	0.590074	0.555141	0.693321	FALSE
BRIP1	19.1489	-0.795419	0.348885	-2.27989	0.0226143	0.0687884	TRUE
BRIX1	535.599	-0.0941463	0.093977	-1.0018	0.31644	0.469615	TRUE
BRK1	2572.01	0.25631	0.119693	2.1414	0.0322418	0.0891987	TRUE
BRMS1	0.546902	0.236786	0.365048	0.648643	0.516569	NA	TRUE
BRMS1L	0.373902	0.086379	0.304321	0.283842	0.776532	NA	TRUE
BROX	1499.02	-0.446051	0.220559	-2.02237	0.043138	0.111096	TRUE
BRPF1	743.618	0.139244	0.100177	1.38998	0.164536	0.296057	TRUE
BRPF3	786.624	0.122955	0.116369	1.0566	0.290696	0.442839	TRUE
BRS3	0	NA	NA	NA	NA	NA	TRUE
BRSK1	89.0149	-0.836367	0.179175	-4.66787	3.04334e-06	7.6784e-05	TRUE
BRSK2	7.40463	-0.808048	0.43677	-1.85005	0.064306	0.149572	TRUE
BRWD1	1052.05	-0.0866229	0.138949	-0.623413	0.533013	0.674013	TRUE
BRWD3	279.192	0.147809	0.162335	0.910518	0.362549	0.517459	TRUE
BSCL2	4009.2	0.707628	0.205967	3.43563	0.000591168	0.00435925	TRUE
BSDC1	2093.19	0.236611	0.10179	2.3245	0.0200986	0.0629687	TRUE
BSG	23548	0.425924	0.127998	3.32758	0.000876036	0.00585145	FALSE
BSN	12.6874	0.0796254	0.341038	0.23348	0.815389	0.88885	TRUE
BSND	1609.41	-0.309855	0.260409	-1.18988	0.234093	0.380954	TRUE
BSPH2	0	NA	NA	NA	NA	NA	FALSE
BSPRY	1997.34	0.283063	0.0726293	3.89737	9.72442e-05	0.00112206	TRUE
BST1	129.834	-1.10975	0.336185	-3.30102	0.000963334	0.00626519	TRUE
BST2	1320.04	-1.14727	0.225686	-5.08349	3.70563e-07	1.48216e-05	FALSE
BSX	2.92133	1.04648	0.486054	2.15302	0.0313172	0.087329	FALSE
BTAF1	1080.05	0.102037	0.101991	1.00044	0.317095	0.470403	TRUE
BTBD1	2270.66	-0.172801	0.0530206	-3.25914	0.00111752	0.00705408	FALSE
BTBD10	382.761	0.0170758	0.113652	0.150246	0.88057	0.93046	TRUE
BTBD11	205.043	-0.080865	0.249698	-0.323852	0.74605	0.839729	TRUE
BTBD16	3.214	-0.192347	0.473862	-0.405914	0.684806	0.796447	TRUE
BTBD17	0.598013	-0.072062	0.263657	-0.273318	0.784609	NA	TRUE
BTBD18	0.121525	0.0336651	0.260855	0.129056	0.897313	NA	TRUE
BTBD2	2187.03	0.235477	0.08903	2.64491	0.00817119	0.0318967	TRUE
BTBD3	496.516	-0.120556	0.10209	-1.18088	0.237651	0.384776	TRUE
BTBD6	1332.14	0.23171	0.1017	2.27836	0.0227049	0.0689769	TRUE
BTBD7	1509.67	-0.00256323	0.107612	-0.0238192	0.980997	0.988732	TRUE
BTBD9	972.632	0.341206	0.11982	2.84766	0.00440415	0.0200425	TRUE
BTC	92.9734	-0.370222	0.346438	-1.06865	0.285226	0.437031	TRUE
BTD	1898.92	0.511214	0.15079	3.39023	0.000698335	0.00491748	TRUE
BTF3	1934.76	0.37944	0.144278	2.62993	0.00854026	0.0329037	TRUE
BTF3L4	341.519	0.265113	0.13135	2.01837	0.043553	0.111892	TRUE
BTG1	2056.32	-0.763579	0.189478	-4.02992	5.57961e-05	0.000738652	TRUE
BTG2	767.331	-0.868775	0.21019	-4.13328	3.57627e-05	0.000519035	TRUE
BTG3	256.658	-0.270139	0.0953249	-2.83387	0.00459875	0.0207657	TRUE
BTG4	0.121525	0.0336651	0.260855	0.129056	0.897313	NA	TRUE
BTK	49.1118	-1.18195	0.378722	-3.1209	0.00180301	0.0100738	TRUE
BTLA	21.2336	-1.31329	0.371913	-3.53119	0.000413697	0.00333945	TRUE
BTN1A1	5.78107	0.520247	0.437395	1.18942	0.234273	0.381137	TRUE
BTN2A2	146.303	0.838904	0.206083	4.07072	4.68682e-05	0.000644916	TRUE
BTN3A2	0	NA	NA	NA	NA	NA	FALSE
BTNL2	0.939357	-0.309634	0.426051	-0.726754	0.467377	NA	TRUE
BTNL3	0	NA	NA	NA	NA	NA	TRUE
BTNL5	0.0981752	-0.0673637	0.260855	-0.258242	0.79622	NA	FALSE
BTNL7	0	NA	NA	NA	NA	NA	FALSE
BTNL8	0.121525	0.0336651	0.260855	0.129056	0.897313	NA	TRUE
BTRC	640.563	0.114295	0.0912099	1.2531	0.21017	0.352665	TRUE
BUB1	52.0073	-0.581571	0.283688	-2.05004	0.040361	0.105604	TRUE
BUB1B	23.0276	-1.12646	0.439384	-2.56373	0.0103553	0.0379394	TRUE
BUB3	1399.04	0.198801	0.0995741	1.99652	0.0458775	0.116411	TRUE
BUD13	332.995	-0.0889445	0.108885	-0.816865	0.414006	0.567675	TRUE
BUD31	895.954	0.0227967	0.153461	0.148551	0.881908	0.93097	TRUE
BVES	8.95551	-0.620901	0.428491	-1.44904	0.147326	0.274184	TRUE
BYSL	346.746	-0.0788017	0.1022	-0.771057	0.440673	0.591925	TRUE
BZRAP1	85.0843	-0.572633	0.245784	-2.32982	0.0198159	0.062297	TRUE
BZW1	5386.26	0.26623	0.0930863	2.86004	0.00423594	0.01945	TRUE
BZW2	479.936	-0.665626	0.173441	-3.83777	0.000124157	0.00136081	TRUE
C1D	186.155	0.172151	0.144366	1.19246	0.23308	0.379764	TRUE
C1GALT1	2532.59	0.225018	0.14197	1.58497	0.112974	0.226256	TRUE
C1GALT1C1	761.447	0.0385047	0.116215	0.331324	0.7404	0.836102	TRUE
C1H6ORF35	987.186	0.344916	0.1491	2.31332	0.0207051	0.0643137	FALSE
C1QA	396.723	-0.432696	0.324955	-1.33156	0.183005	0.31991	TRUE
C1QB	366.804	-0.932126	0.342067	-2.72498	0.00643057	0.0267185	TRUE
C1QBP	2953.92	0.250854	0.13713	1.82932	0.0673521	0.15463	TRUE
C1QC	546.046	-0.732032	0.34391	-2.12855	0.0332911	0.0911321	TRUE
C1QL1	0.294526	-0.179618	0.260855	-0.688573	0.491092	NA	FALSE
C1QL2	0	NA	NA	NA	NA	NA	TRUE
C1QL3	10.238	-0.755945	0.375341	-2.01402	0.0440076	0.112751	TRUE
C1QL4	39.2805	0.419203	0.379908	1.10343	0.269839	0.42009	TRUE
C1QTNF1	177.694	-1.11586	0.213328	-5.23074	1.68836e-07	7.85064e-06	TRUE
C1QTNF2	129.458	-1.03526	0.231044	-4.48079	7.43679e-06	0.000154019	TRUE
C1QTNF3	987.433	0.795447	0.191318	4.15772	3.21443e-05	0.000478873	TRUE
C1QTNF4	154.549	0.37169	0.435181	0.854105	0.393047	0.547651	TRUE
C1QTNF5	254.899	-1.95985	0.290072	-6.7564	1.41458e-11	2.68278e-09	TRUE
C1QTNF6	79.6006	-1.30195	0.362651	-3.59008	0.000330573	0.00281095	TRUE
C1QTNF7	102.123	-1.22032	0.198038	-6.16208	7.17965e-10	7.8184e-08	TRUE
C1QTNF9	4.59599	-1.12532	0.478023	-2.35411	0.0185673	0.0592322	TRUE
C1R	3887.21	-2.07677	0.306374	-6.77854	1.21399e-11	2.35529e-09	TRUE
C1RL	155.967	-0.0952024	0.22365	-0.425676	0.670344	0.785582	TRUE
C1S	2277.11	-2.17827	0.330476	-6.5913	4.35981e-11	7.21463e-09	TRUE
C2	250.454	-1.38688	0.367675	-3.77203	0.000161925	0.0016696	TRUE
C2CD2	295.038	-0.212997	0.18161	-1.17283	0.240866	0.388196	TRUE
C2CD2L	2031.53	0.979384	0.207265	4.72529	2.29792e-06	6.12744e-05	TRUE
C2CD3	387.603	-0.115847	0.149599	-0.774381	0.438705	0.590226	TRUE
C2CD4A	8.73575	0.176507	0.411232	0.429216	0.667766	0.783739	TRUE
C2CD4B	3.5018	-1.19236	0.486905	-2.44886	0.0143307	0.0486306	FALSE
C2CD4C	12.107	-1.19475	0.455385	-2.62361	0.00870036	0.0333606	TRUE
C2CD4D	55.4861	0.226947	0.288726	0.786029	0.43185	0.584118	FALSE
C2CD5	1062.04	0.0724854	0.0977853	0.74127	0.458529	0.607914	TRUE
C3	558.715	-0.783683	0.382583	-2.0484	0.0405212	0.105908	TRUE
C3AR1	124.64	-0.94726	0.380431	-2.48996	0.0127757	0.0445999	TRUE
C4A	1569.87	-1.73411	0.368419	-4.70689	2.51526e-06	6.58626e-05	TRUE
C4B	461.81	-2.32282	0.400008	-5.80693	6.36269e-09	4.90392e-07	FALSE
C4BPA	14.5516	-1.16526	0.48016	-2.42682	0.0152319	0.0508403	TRUE
C4BPB	12.2662	0.480827	0.336709	1.42802	0.153286	0.281935	TRUE
C5	2921.43	0.438205	0.165555	2.64688	0.00812378	0.0317708	TRUE
C5AR1	153.652	-1.23814	0.389424	-3.17941	0.00147577	0.00866718	TRUE
C5AR2	133.602	-1.16358	0.375763	-3.09658	0.00195767	0.0107354	TRUE
C6	52.0939	-1.78876	0.454243	-3.93789	NA	NA	TRUE
C7	10336.1	-1.57999	0.309371	-5.10711	3.27122e-07	1.35663e-05	TRUE
C8A	0.575198	0.0117542	0.366131	0.0321039	0.974389	NA	TRUE
C8B	66.3347	1.06761	0.4532	2.35572	0.018487	0.0590652	TRUE
C8G	184.449	0.410638	0.144378	2.84419	0.00445241	0.0202131	TRUE
C9	2.43796	0.69324	0.477887	1.45064	0.146881	0.273703	TRUE
CA1	2.59177	-1.46828	0.474235	-3.09611	0.00196078	0.0107455	TRUE
CA10	26.5519	0.00821097	0.476402	0.0172354	0.986249	0.992313	TRUE
CAAP1	248.929	-0.160958	0.131761	-1.22159	0.221862	0.367318	TRUE
CAB39	3871.05	0.139989	0.0569247	2.45919	0.013925	0.0474829	TRUE
CAB39L	1335.75	0.22555	0.0656166	3.43739	0.00058735	0.00434248	FALSE
CABIN1	152.263	0.00510465	0.165861	0.0307767	0.975448	0.985155	TRUE
CABLES1	286.06	-0.909242	0.225573	-4.03081	5.55839e-05	0.000737	TRUE
CABLES2	468.842	-0.144004	0.087378	-1.64806	0.0993402	0.205523	TRUE
CABP1	108.147	-0.937324	0.309636	-3.02718	0.00246848	0.0128518	TRUE
CABP2	14.7297	-0.784485	0.423567	-1.85209	0.0640129	0.149134	TRUE
CABP4	21.4765	-0.0981766	0.351098	-0.279628	0.779763	0.863567	FALSE
CABP5	0.786256	0.341894	0.380553	0.898413	0.368965	NA	FALSE
CABP7	37.2642	0.0991455	0.481299	0.205996	0.836794	0.902335	TRUE
CABS1	0	NA	NA	NA	NA	NA	FALSE
CABYR	9.02475	-0.275304	0.405327	-0.679215	0.497002	0.641254	TRUE
CACFD1	307.874	0.144759	0.142445	1.01624	0.309514	0.462531	TRUE
CACHD1	825.503	-0.0216709	0.163751	-0.132341	0.894715	0.93939	TRUE
CACNA1A	235.237	0.672256	0.34094	1.97177	0.0486355	0.121726	TRUE
CACNA1B	2.05612	-0.736446	0.435313	-1.69176	0.0906913	0.192261	FALSE
CACNA1C	99.9628	-0.780253	0.267465	-2.91722	0.00353166	0.0169061	TRUE
CACNA1D	407.09	-0.252397	0.122781	-2.05566	0.0398149	0.104597	TRUE
CACNA1E	6.43086	0.483153	0.48476	0.996686	0.318917	0.472608	TRUE
CACNA1F	1.60751	0.648552	0.481937	1.34572	0.178393	0.314114	FALSE
CACNA1G	113.301	-0.400641	0.282529	-1.41805	0.156175	0.285661	TRUE
CACNA1H	241.09	1.86113	0.268564	6.92994	4.21023e-12	9.22915e-10	TRUE
CACNA1I	0.747485	-0.467159	0.382524	-1.22125	0.22199	NA	FALSE
CACNA1S	7.61744	-0.00246123	0.477868	-0.00515043	0.995891	0.998013	TRUE
CACNA2D1	156.078	-1.49561	0.252946	-5.91275	3.36444e-09	2.83942e-07	TRUE
CACNA2D2	42.1385	-0.462288	0.228576	-2.02247	0.0431281	0.111088	TRUE
CACNA2D3	6.34856	-0.998666	0.472085	-2.11544	0.0343928	0.0932837	TRUE
CACNA2D4	0.460519	0.100076	0.306764	0.32623	0.74425	NA	FALSE
CACNB1	42.0176	-0.62347	0.246849	-2.52572	0.0115463	0.0412466	TRUE
CACNB2	87.9656	-0.0096124	0.240612	-0.0399498	0.968133	0.980829	TRUE
CACNB3	175.001	-1.67453	0.374965	-4.46582	7.97642e-06	0.000162186	TRUE
CACNB4	588.242	0.600708	0.186421	3.22231	0.00127161	0.00775696	TRUE
CACNG1	0.861345	0.295368	0.447036	0.660725	0.508789	NA	TRUE
CACNG2	0	NA	NA	NA	NA	NA	TRUE
CACNG3	0	NA	NA	NA	NA	NA	FALSE
CACNG4	5.5508	-0.0791535	0.450473	-0.175712	0.86052	0.917023	TRUE
CACNG5	3184.13	-0.171852	0.408965	-0.420213	0.67433	0.788283	TRUE
CACNG6	0.761769	-0.534951	0.396067	-1.35066	0.176804	NA	TRUE
CACNG7	1.39717	0.00125065	0.471697	0.00265139	0.997884	0.99908	FALSE
CACNG8	0.235418	-0.123491	0.260855	-0.473408	0.635922	NA	TRUE
CACTIN	529.985	-0.147657	0.0960027	-1.53805	0.124036	0.241727	TRUE
CACUL1	1848.62	0.257178	0.078364	3.28183	0.00103135	0.00662914	TRUE
CACYBP	1593.12	0.0891063	0.108161	0.823827	0.410038	0.564244	TRUE
CAD	647.868	-0.0173119	0.104962	-0.164935	0.868995	0.922733	TRUE
CADM1	120.847	-0.757929	0.334107	-2.26853	0.0232972	0.0704341	TRUE
CADM2	4.87308	0.19223	0.485861	0.395648	0.692365	0.802364	TRUE
CADM3	73.9433	-0.624921	0.357094	-1.75002	0.0801148	0.174801	TRUE
CADM4	111.178	-1.15681	0.349027	-3.31439	0.000918431	0.00607215	FALSE
CADPS	85.3974	-0.47507	0.416372	-1.14097	0.253881	0.402598	TRUE
CADPS2	466.609	0.238635	0.139289	1.71323	0.0866698	0.185765	TRUE
CAGE1	36.7625	-0.75202	0.278572	-2.69955	0.00694325	0.0282943	TRUE
CALB1	6690.5	0.0331487	0.482184	0.0687469	0.945191	0.967899	TRUE
CALB2	1.00146	-0.57192	0.434163	-1.31729	0.18774	NA	TRUE
CALCA	4.13936	-0.202296	0.483923	-0.418033	0.675923	0.789145	TRUE
CALCB	2.89953	-1.64342	0.481331	-3.41434	0.000639375	0.00461	TRUE
CALCOCO1	4.67548	-0.735766	0.396954	-1.85353	NA	NA	TRUE
CALCOCO2	0.137243	-0.0673637	0.260855	-0.258242	0.79622	NA	TRUE
CALCR	117.581	0.0474693	0.209238	0.226867	0.820527	0.891859	TRUE
CALCRL	857.189	-0.621154	0.198342	-3.13174	0.00173775	0.00980998	TRUE
CALD1	3854.91	-0.876427	0.140721	-6.2281	4.72133e-10	5.49595e-08	TRUE
CALHM1	0	NA	NA	NA	NA	NA	TRUE
CALHM2	149.135	-0.999452	0.196885	-5.07632	3.84805e-07	1.5274e-05	TRUE
CALHM3	0	NA	NA	NA	NA	NA	FALSE
CALM1	7730.84	0.0748878	0.100564	0.74468	0.456465	0.60619	TRUE
CALM2	4592.66	-0.43615	0.10244	-4.25763	2.06608e-05	0.000341765	TRUE
CALM3	3126.79	0.385979	0.165561	2.33135	0.0197352	0.0621126	TRUE
CALML3	5.22658	-0.675152	0.486762	-1.38703	0.165434	0.297281	TRUE
CALML4	4459.31	0.758644	0.308076	2.46252	0.0137963	0.0471489	TRUE
CALML5	3.38412	0.280306	0.473346	0.59218	0.55373	0.691968	TRUE
CALN1	134.532	-0.406246	0.310254	-1.3094	0.190399	0.328739	TRUE
CALR	15803.4	-0.0115052	0.0931986	-0.123448	0.901752	0.943216	TRUE
CALR3	94.1081	0.036961	0.17793	0.207728	0.835442	0.901395	TRUE
CALR4	1.81415	-0.00500099	0.470553	-0.0106279	0.99152	0.995235	FALSE
CALU	2350.23	-0.366314	0.134284	-2.72792	0.00637358	0.0265247	TRUE
CALY	1.65252	-0.982733	0.482145	-2.03825	0.0415246	0.107924	TRUE
CAMK1	1017.75	0.211327	0.0856428	2.46754	0.0136047	0.0466924	TRUE
CAMK1D	70.1994	-0.896693	0.343439	-2.61092	0.00902983	0.0342504	TRUE
CAMK1G	5.86665	-1.59073	0.481663	-3.30257	0.00095802	0.00623859	TRUE
CAMK2A	2.05358	-0.408637	0.481713	-0.848299	0.396271	0.550643	TRUE
CAMK2B	107.675	1.1224	0.300434	3.73594	0.000187015	0.00186733	TRUE
CAMK2D	789.433	-0.505455	0.119847	-4.21751	2.47015e-05	0.000397461	TRUE
CAMK2G	229.372	0.0631678	0.11141	0.566983	0.570726	0.707082	TRUE
CAMK2N1	1379.47	0.487137	0.201842	2.41346	0.015802	0.0522166	TRUE
CAMK2N2	41.6878	0.806682	0.24201	3.33325	0.000858363	0.00575435	TRUE
CAMK4	43.233	-1.61039	0.398116	-4.04503	5.23162e-05	0.00070289	TRUE
CAMKK1	296.395	-0.05701	0.164848	-0.345834	0.729468	0.829672	TRUE
CAMKK2	137.774	0.539942	0.218236	2.47412	0.0133566	0.0460653	TRUE
CAMKMT	146.48	-0.508854	0.114886	-4.42922	9.45757e-06	0.000184616	TRUE
CAMKV	58.0523	0.449214	0.453974	0.989515	0.322411	0.476405	TRUE
CAMLG	345.76	-0.0313052	0.0964901	-0.32444	0.745605	0.83934	TRUE
CAMP	5.1037	-0.636075	0.369302	-1.72237	NA	NA	TRUE
CAMSAP1	669.41	0.147603	0.102072	1.44606	0.148159	0.275207	TRUE
CAMSAP2	1288.97	-0.110646	0.122836	-0.900766	0.367713	0.522872	TRUE
CAMSAP3	904.82	0.413566	0.147954	2.79523	0.00518624	0.0227196	TRUE
CAMTA1	89.1845	-0.422707	0.215196	-1.96429	0.0494966	0.123405	TRUE
CAMTA2	2248.12	0.24969	0.0609836	4.09438	4.2329e-05	0.000592634	TRUE
CAND1	2537.07	0.215515	0.100793	2.13818	0.0325019	0.0896537	TRUE
CAND2	211.516	-0.679524	0.202472	-3.35613	0.000790416	0.00539921	TRUE
CANT1	918.247	-0.0326993	0.086878	-0.376381	0.706633	0.813703	TRUE
CANX	16287.9	0.124353	0.10591	1.17413	0.240341	0.387609	TRUE
CAP1	5000.08	-0.234709	0.104399	-2.24818	0.0245645	0.0730614	TRUE
CAP2	94.9931	-0.272145	0.335245	-0.811779	0.416919	0.570412	TRUE
CAPG	599.479	-2.64116	0.437309	-6.03958	1.5452e-09	1.51637e-07	TRUE
CAPN1	1534.29	-0.68356	0.236283	-2.89297	0.00381613	0.0179522	TRUE
CAPN10	473.38	0.0983964	0.0856139	1.1493	0.250431	0.398926	TRUE
CAPN11	0.678124	-0.0705812	0.315428	-0.223763	0.822942	NA	TRUE
CAPN12	38.3678	-0.445087	0.347683	-1.28015	0.200492	0.341429	TRUE
CAPN13	26.9358	-1.69639	0.477783	-3.55055	NA	NA	TRUE
CAPN15	636.656	0.25658	0.139911	1.83388	0.0666718	0.153523	TRUE
CAPN2	2530.31	-0.578467	0.193638	-2.98737	0.0028139	0.0142246	TRUE
CAPN3	11.5515	-0.266535	0.388886	-0.685379	0.493105	0.638013	TRUE
CAPN5	826.718	-0.769678	0.245946	-3.12946	0.00175127	0.00987295	TRUE
CAPN6	194.892	-0.245494	0.473532	-0.518432	0.604157	0.735627	TRUE
CAPN7	1067.27	-0.00865204	0.0799058	-0.108278	0.913775	0.949321	TRUE
CAPN8	0.19635	-0.123491	0.260855	-0.473408	0.635922	NA	TRUE
CAPN9	0.52664	-0.259956	0.261989	-0.992239	0.321081	NA	TRUE
CAPNS1	1067.31	0.0211694	0.106276	0.199193	0.842112	0.906159	TRUE
CAPNS2	1.91672	-0.646149	0.486865	-1.32716	0.184454	0.321999	TRUE
CAPRIN1	9088.1	0.334902	0.143022	2.34161	0.0192008	0.0608848	TRUE
CAPRIN2	261.915	0.0495672	0.125901	0.393699	0.693803	0.803258	TRUE
CAPS2	23.4555	-0.0747599	0.27887	-0.268082	0.788636	0.869798	TRUE
CAPSL	6.71262	-0.96254	0.45568	-2.11232	0.0346593	0.0938124	TRUE
CAPZA1	1929.38	-0.091376	0.109338	-0.835717	0.403314	0.557173	TRUE
CAPZA2	3966.52	0.0930576	0.0901224	1.03257	0.301806	0.45477	TRUE
CAPZA3	0	NA	NA	NA	NA	NA	TRUE
CAPZB	4466.57	0.328095	0.0933841	3.51339	0.000442429	0.00350599	TRUE
CAR11	92.0171	-1.00993	0.218079	-4.63101	3.63887e-06	8.81212e-05	FALSE
CAR12	31526.4	0.708105	0.257887	2.7458	0.00603634	0.0254718	FALSE
CAR13	36.589	-0.655513	0.295715	-2.2167	0.0266433	0.0775365	FALSE
CAR14	1766.74	0.805174	0.399758	2.01415	0.0439936	0.112732	FALSE
CAR15	917.495	0.545728	0.388365	1.40519	0.159964	0.290233	FALSE
CAR2	9899.46	-0.0422977	0.103614	-0.408225	0.683109	0.794857	FALSE
CAR3	190.152	-2.62355	0.420226	-6.24319	4.28731e-10	5.06052e-08	FALSE
CAR4	1581.82	0.756206	0.159356	4.74538	2.08117e-06	5.63852e-05	FALSE
CAR5A	28.6301	-2.58295	0.48098	-5.37018	7.86578e-08	4.09773e-06	FALSE
CAR5B	3910.61	0.533634	0.141666	3.76686	0.000165317	0.00169628	FALSE
CAR6	561.224	0.403448	0.427657	0.943394	0.34548	0.500503	FALSE
CAR7	374.984	1.38233	0.233389	5.92285	3.16408e-09	2.71099e-07	FALSE
CAR8	518.778	-0.0584877	0.242908	-0.240781	0.809725	0.88524	FALSE
CAR9	5.61752	-0.544842	0.476681	-1.14299	0.253042	0.401797	FALSE
CARD10	2106.41	0.193854	0.110943	1.74733	0.0805803	0.175566	TRUE
CARD14	171.985	0.077109	0.20565	0.374952	0.707696	0.814261	TRUE
CARD6	462.38	-0.718127	0.170779	-4.20501	2.61075e-05	0.00041103	TRUE
CARD9	60.153	-0.866399	0.34046	-2.54479	0.0109344	0.0394833	TRUE
CARF	272.935	-0.0905743	0.113684	-0.796719	0.425614	0.578743	TRUE
CARHSP1	2413.57	-0.234953	0.175867	-1.33597	0.18156	0.318093	TRUE
CARKD	593.864	0.126042	0.130893	0.962939	0.335578	0.490125	TRUE
CARM1	811.892	-0.0775219	0.087852	-0.882415	0.377552	0.531857	TRUE
CARNS1	89.7437	-0.354056	0.235187	-1.50542	0.132217	0.254004	TRUE
CARS	515.228	0.146591	0.0852503	1.71954	0.0855161	0.183834	TRUE
CARS2	478.874	0.314623	0.0936766	3.35861	0.000783362	0.00536187	TRUE
CARTPT	0	NA	NA	NA	NA	NA	TRUE
CASC1	154.58	-0.0926988	0.146166	-0.634202	0.525949	0.66748	TRUE
CASC3	629.198	0.0428546	0.127864	0.335158	0.737506	0.834677	TRUE
CASC4	238.134	-0.788186	0.210664	-3.74145	0.000182964	0.00183606	TRUE
CASC5	15.9217	-1.18994	0.427451	-2.78381	0.00537245	0.0233114	TRUE
CASK	156.273	0.182906	0.143581	1.27388	0.202706	0.343971	TRUE
CASKIN1	69.6166	-0.103365	0.203689	-0.507463	0.61183	0.742171	TRUE
CASKIN2	2146.39	-0.0847916	0.0780221	-1.08676	0.277141	0.427788	TRUE
CASP1	214.179	-1.21274	0.234912	-5.16252	2.43651e-07	1.04913e-05	TRUE
CASP12	100.309	-1.81025	0.338891	-5.34169	9.20851e-08	4.66758e-06	TRUE
CASP14	0.20244	-0.022462	0.260855	-0.0861092	0.93138	NA	TRUE
CASP2	508.379	-0.300723	0.112944	-2.6626	0.00775403	0.0308171	TRUE
CASP3	409.198	-0.780273	0.182397	-4.27789	1.88674e-05	0.000320385	TRUE
CASP4	252.784	-0.664657	0.161888	-4.10567	4.0315e-05	0.000568961	FALSE
CASP6	565.303	0.41219	0.122295	3.37046	0.000750415	0.00518896	TRUE
CASP7	763.828	-0.181491	0.181035	-1.00251	0.316095	0.469332	TRUE
CASP8	291.755	-0.673435	0.13471	-4.99917	5.75783e-07	2.12117e-05	TRUE
CASP8AP2	405.399	-0.161185	0.153578	-1.04953	0.293934	0.446522	TRUE
CASP9	577.579	0.315555	0.102333	3.08362	0.002045	0.0111034	TRUE
CASQ1	367.881	0.128749	0.367338	0.350491	0.72597	0.827207	TRUE
CASQ2	14.677	-0.557798	0.388824	-1.43458	0.151408	0.279362	FALSE
CASR	2318.99	-0.0422278	0.243242	-0.173604	0.862177	0.917993	TRUE
CASS4	48.3044	-1.88297	0.38408	-4.90255	9.46008e-07	3.05894e-05	FALSE
CAST	2550.4	-0.168496	0.10051	-1.67641	0.0936579	0.197068	TRUE
CASZ1	619.502	-0.018376	0.236521	-0.0776928	0.938072	0.962946	TRUE
CAT	40236.8	0.641849	0.234223	2.74033	0.00613768	0.0257899	TRUE
CATSPER1	0	NA	NA	NA	NA	NA	FALSE
CATSPER2	107.736	0.529241	0.188624	2.8058	0.00501916	0.022195	TRUE
CATSPER3	0.174314	0.0785668	0.260855	0.301189	0.76327	NA	FALSE
CATSPER4	2.90883	-0.6783	0.483062	-1.40417	0.16027	0.290448	TRUE
CATSPERD	27.7694	0.0212939	0.245101	0.0868781	0.930768	0.959182	TRUE
CATSPERG1	93.4778	-0.173141	0.180106	-0.961328	0.336387	0.491124	FALSE
CAV1	817.65	-0.413778	0.194762	-2.12452	0.0336263	0.0918857	TRUE
CAV2	1022.96	-0.230627	0.252267	-0.914219	0.360602	0.515595	TRUE
CAV3	6.05848	-0.581174	0.469503	-1.23785	0.215772	0.359457	TRUE
CBFA2T2	1028.18	-0.0732223	0.100352	-0.729657	0.4656	0.613542	TRUE
CBFA2T3	462.122	-0.471859	0.15813	-2.98398	0.00284522	0.0143338	TRUE
CBFB	782.194	-0.448863	0.1635	-2.74533	0.006045	0.025502	TRUE
CBL	942.939	-0.346066	0.146584	-2.36087	0.018232	0.058461	TRUE
CBLB	570.249	-0.200915	0.105813	-1.89877	0.0575941	0.137852	TRUE
CBLC	109.335	-1.87645	0.410514	-4.57097	4.85462e-06	0.000110767	TRUE
CBLL1	449.495	-0.139146	0.104981	-1.32544	0.185025	0.322628	TRUE
CBLN1	0.0981752	-0.0673637	0.260855	-0.258242	0.79622	NA	TRUE
CBLN2	1.80364	-0.56583	0.446719	-1.26664	0.205285	0.346914	TRUE
CBLN3	3.6768	0.0312131	0.4779	0.065313	0.947925	0.96939	TRUE
CBLN4	0	NA	NA	NA	NA	NA	TRUE
CBR1	23.9906	-0.662742	0.30149	-2.19823	0.0279331	0.0803617	TRUE
CBR3	102.519	-0.613096	0.177294	-3.45809	0.00054403	0.00409575	TRUE
CBR4	742.832	0.215641	0.124653	1.72993	0.0836427	0.180769	TRUE
CBS	6090.84	0.489832	0.25789	1.89938	0.0575141	0.137719	TRUE
CBWD1	244.528	-0.0120029	0.124159	-0.0966736	0.922986	0.95495	FALSE
CBX1	978.533	-0.236177	0.0908307	-2.60019	0.00931726	0.0351092	TRUE
CBX2	74.702	-0.361259	0.167862	-2.15212	0.0313881	0.0874835	TRUE
CBX3	1355.62	-0.175672	0.0899116	-1.95383	0.0507209	0.125512	TRUE
CBX4	154.874	-0.300475	0.1995	-1.50614	0.132032	0.253823	TRUE
CBX5	433.745	-0.340071	0.102646	-3.31306	0.000922828	0.00608691	TRUE
CBX6	2675.51	0.0615095	0.0836506	0.735315	0.462148	0.610814	TRUE
CBX7	1457.44	-0.0517338	0.0853998	-0.605784	0.544658	0.683974	TRUE
CBX8	67.0073	-0.391388	0.213217	-1.83563	0.066412	0.153145	TRUE
CBY1	374.574	-0.148547	0.10738	-1.38338	0.166548	0.298774	TRUE
CBY3	93.0507	-0.211673	0.251278	-0.842387	0.399571	0.55389	TRUE
CC2D1A	1204.47	0.110755	0.101934	1.08653	0.277243	0.427881	TRUE
CC2D1B	1122.41	-0.0457461	0.0839293	-0.545055	0.585715	0.719422	TRUE
CC2D2A	440.145	0.15038	0.115058	1.307	0.191213	0.329873	TRUE
CC2D2B	0.216496	-0.123491	0.260855	-0.473408	0.635922	NA	FALSE
CCAR1	949.181	0.0630378	0.118604	0.5315	0.595072	0.727634	TRUE
CCAR2	1526.01	0.016073	0.0592318	0.271359	0.786115	0.868209	FALSE
CCBE1	133.587	-0.170878	0.226847	-0.753275	0.451285	0.601652	TRUE
CCBL1	11424.6	0.803917	0.258113	3.1146	0.00184196	0.0102372	TRUE
CCDC101	375.234	0.0611822	0.117137	0.522315	0.601451	0.733306	TRUE
CCDC102A	153.814	-0.723939	0.234859	-3.08244	0.00205311	0.0111286	TRUE
CCDC103	38.755	0.224407	0.246939	0.908754	0.36348	0.518392	TRUE
CCDC104	1420.69	0.1569	0.119798	1.30971	0.190295	0.328697	TRUE
CCDC105	0	NA	NA	NA	NA	NA	TRUE
CCDC106	41.767	-0.502651	0.2016	-2.49331	0.0126557	0.0443002	TRUE
CCDC107	581.312	0.0364716	0.12059	0.302444	0.762313	0.850998	TRUE
CCDC109B	15.4062	-0.710275	0.348784	-2.03643	0.0417073	0.108254	TRUE
CCDC11	63.3685	-1.25047	0.362215	-3.4523	0.000555828	0.00415677	TRUE
CCDC110	0	NA	NA	NA	NA	NA	TRUE
CCDC111	83.2727	-0.860158	0.327889	-2.62332	0.00870776	0.0333662	TRUE
CCDC112	105.769	-0.450369	0.163105	-2.76123	0.00575842	0.024526	TRUE
CCDC113	125.547	0.160465	0.167554	0.957693	0.338218	0.493027	TRUE
CCDC114	22.2159	-0.354627	0.376948	-0.940785	0.346815	0.501983	TRUE
CCDC115	271.723	0.272348	0.113309	2.40358	0.0162353	0.0533765	TRUE
CCDC116	3.54234	0.658979	0.478597	1.3769	0.168544	0.301362	TRUE
CCDC117	619.365	-0.188012	0.216553	-0.868204	0.385283	0.540273	TRUE
CCDC12	662.774	-0.14541	0.18131	-0.801996	0.422555	0.576116	TRUE
CCDC120	87.5492	-0.434546	0.291102	-1.49276	0.135499	0.258369	TRUE
CCDC121	0.370108	-0.111755	0.305477	-0.365837	0.714487	NA	TRUE
CCDC122	136.071	1.34492	0.295	4.55906	5.13821e-06	0.000115841	TRUE
CCDC124	952.399	0.0163782	0.109383	0.149732	0.880976	0.93058	TRUE
CCDC125	307.835	-0.619417	0.106962	-5.79099	6.99741e-09	5.2493e-07	TRUE
CCDC126	419.115	0.387888	0.157208	2.46735	0.0136116	0.0467067	TRUE
CCDC127	659.31	0.0020995	0.101675	0.0206491	0.983526	0.990348	TRUE
CCDC129	0.216496	-0.123491	0.260855	-0.473408	0.635922	NA	TRUE
CCDC13	12.9743	-0.0024761	0.345449	-0.00716777	0.994281	0.996941	TRUE
CCDC130	210.189	0.00453926	0.118804	0.0382081	0.969522	0.981442	TRUE
CCDC132	438.849	0.478424	0.149201	3.20657	0.00134325	0.0081032	TRUE
CCDC134	223.715	-0.116517	0.131961	-0.882967	0.377254	0.531657	TRUE
CCDC135	0	NA	NA	NA	NA	NA	TRUE
CCDC136	37.1201	-1.66465	0.380914	-4.37014	1.24167e-05	0.000229325	TRUE
CCDC137	332.766	0.0977827	0.151194	0.646739	0.517801	0.660118	TRUE
CCDC138	171.475	-0.0068666	0.127551	-0.0538342	0.957067	0.974738	TRUE
CCDC14	141.854	-0.27895	0.155142	-1.79803	0.0721715	0.162598	TRUE
CCDC141	2035.82	0.382734	0.316677	1.20859	0.226819	0.372936	TRUE
CCDC142	289.497	0.0113229	0.182408	0.0620748	0.950503	0.970963	TRUE
CCDC144B	0.3969	0.0881455	0.307014	0.287106	0.774031	NA	FALSE
CCDC146	9.33164	0.201111	0.371901	0.540764	0.58867	0.721895	TRUE
CCDC147	0	NA	NA	NA	NA	NA	TRUE
CCDC148	107.957	-0.286615	0.217605	-1.31713	0.187794	0.325707	TRUE
CCDC149	328.083	0.0666208	0.105686	0.630367	0.528455	0.670006	TRUE
CCDC15	53.8175	0.308598	0.298431	1.03407	0.301104	0.453902	TRUE
CCDC150	9.231	0.649757	0.395112	1.64449	0.100075	0.20665	TRUE
CCDC151	8.95362	-0.628539	0.418175	-1.50305	0.132826	0.254798	TRUE
CCDC152	163.87	0.533454	0.301886	1.76707	0.0772168	0.170271	TRUE
CCDC153	4.21714	-0.393866	0.466827	-0.84371	0.398832	0.553199	TRUE
CCDC154	0.751876	-0.345327	0.39056	-0.884185	0.376596	NA	FALSE
CCDC155	2.57197	-0.659748	0.47291	-1.39508	0.162992	0.293862	TRUE
CCDC157	176.364	0.336301	0.203144	1.65548	0.0978263	0.203203	TRUE
CCDC158	41.5655	0.774409	0.280056	2.7652	0.00568881	0.0243031	TRUE
CCDC159	164.85	0.217374	0.140613	1.5459	0.122128	0.239086	TRUE
CCDC160	58.8626	-0.361718	0.279946	-1.2921	0.196323	0.336218	TRUE
CCDC163	127.872	-0.319574	0.191135	-1.67198	0.0945288	0.198431	FALSE
CCDC166	0.118321	-0.0673637	0.260855	-0.258242	0.79622	NA	TRUE
CCDC167	66.3698	0.163046	0.198031	0.823336	0.410317	0.564445	TRUE
CCDC169	0.116057	-0.0673637	0.260855	-0.258242	0.79622	NA	TRUE
CCDC17	392.686	0.525135	0.184298	2.84939	0.00438035	0.0199557	TRUE
CCDC170	11.1074	-0.16071	0.397037	-0.404773	0.685645	0.797005	TRUE
CCDC172	0	NA	NA	NA	NA	NA	TRUE
CCDC173	27.6938	-0.129245	0.374538	-0.345079	0.730035	0.829893	TRUE
CCDC174	262.455	-0.0315009	0.103241	-0.305121	0.760274	0.84962	TRUE
CCDC175	27.8276	-0.422545	0.243269	-1.73694	0.0823971	0.178649	TRUE
CCDC176	103.411	0.263572	0.179414	1.46907	0.141813	0.26724	TRUE
CCDC177	11.6535	-0.54172	0.345076	-1.56986	0.116449	0.231158	FALSE
CCDC178	0	NA	NA	NA	NA	NA	FALSE
CCDC179	0	NA	NA	NA	NA	NA	TRUE
CCDC18	27.1486	-0.170574	0.301758	-0.565268	0.571892	0.708162	TRUE
CCDC180	0.962037	0.0194474	0.381352	0.050996	0.959329	NA	TRUE
CCDC181	468.333	0.0940894	0.118852	0.791652	0.428564	0.581259	TRUE
CCDC182	0	NA	NA	NA	NA	NA	FALSE
CCDC183	0	NA	NA	NA	NA	NA	FALSE
CCDC184	9.50917	0.276934	0.463183	0.597892	0.549912	0.688522	FALSE
CCDC19	23.7489	-1.06419	0.293497	-3.62592	0.000287936	0.00255525	TRUE
CCDC22	831.629	0.175856	0.131735	1.33492	0.181902	0.318516	TRUE
CCDC23	118.518	-0.383109	0.194347	-1.97127	0.0486935	0.121799	TRUE
CCDC24	1.18371	-0.0285438	0.451961	-0.0631555	0.949643	0.970397	TRUE
CCDC25	1061.46	0.303406	0.158735	1.91139	0.0559544	0.134845	FALSE
CCDC27	34.642	0.106379	0.337939	0.314788	0.752922	0.84459	FALSE
CCDC28A	254.492	0.181775	0.171165	1.06199	0.28824	0.440373	TRUE
CCDC28B	94.7552	-0.418726	0.172098	-2.43307	0.0149712	0.0502485	TRUE
CCDC3	241.678	-2.06771	0.340465	-6.07321	1.25375e-09	1.28255e-07	TRUE
CCDC30	67.9025	-0.642835	0.2625	-2.44889	0.0143295	0.0486306	TRUE
CCDC32	461.283	0.204218	0.101709	2.00787	0.0446569	0.113982	FALSE
CCDC33	9.4887	0.917399	0.473923	1.93576	0.0528976	0.129682	TRUE
CCDC34	101.634	0.0554432	0.187645	0.295468	0.767637	0.85502	TRUE
CCDC36	1.68912	-0.450226	0.481837	-0.934395	0.3501	0.504986	TRUE
CCDC37	33.0778	0.460255	0.359804	1.27918	0.200833	0.341714	TRUE
CCDC38	0.0981752	-0.0673637	0.260855	-0.258242	0.79622	NA	TRUE
CCDC39	325.328	0.441664	0.111737	3.9527	7.72734e-05	0.00094858	TRUE
CCDC40	4.55619	-0.11272	0.455374	-0.247533	0.804495	0.881562	TRUE
CCDC41	77.1907	-0.362356	0.167905	-2.1581	0.0309197	0.0865209	TRUE
CCDC42	2.1277	1.11295	0.486258	2.28881	0.0220906	0.0675728	TRUE
CCDC42B	1.42831	0.0930535	0.469405	0.198237	0.84286	0.906732	TRUE
CCDC43	517.254	0.106384	0.0907321	1.17251	0.240993	0.388284	TRUE
[truncated: 21,481 more rows]

## Sheet: S7 DEG analysis rat liver
Table S7. Result of DESeq2-analysis for differentially expressed genes during aging in rat liver.
	baseMean	log2FoldChange	lfcSE	stat	pvalue	padj	ortholog_in_the_other_species
A1BG	63.6217	-0.670381	0.234269	-2.86158	NA	NA	TRUE
A1CF	2302.25	-0.0429208	0.224252	-0.191395	0.848216	0.95119	TRUE
A1I3	158273	0.119098	0.180395	0.660206	0.509122	0.798262	FALSE
A26C2	0	NA	NA	NA	NA	NA	FALSE
A2M	0	NA	NA	NA	NA	NA	TRUE
A3GALT2	8.35834	-0.204136	0.289655	-0.704755	0.480963	0.784029	FALSE
A4GALT	0.122801	0.0177085	0.102601	0.172596	0.862969	NA	TRUE
A4GNT	0.0954085	0.0177085	0.102601	0.172596	0.862969	NA	TRUE
AAAS	124.801	0.246183	0.174786	1.40849	0.158987	0.51478	TRUE
AACS	548.353	0.162332	0.291567	0.556758	0.577693	0.835658	TRUE
AADAC	1422.86	-0.219073	0.120176	-1.82293	0.0683132	0.361084	TRUE
AADACL2	0	NA	NA	NA	NA	NA	TRUE
AADACL3	0	NA	NA	NA	NA	NA	FALSE
AADACL4	0	NA	NA	NA	NA	NA	TRUE
AADAT	4139.05	-0.00396468	0.178649	-0.0221925	0.982294	0.995147	TRUE
AAED1	1458.54	-0.126695	0.10892	-1.1632	0.24475	0.610019	TRUE
AAGAB	518.278	0.000168306	0.0956332	0.00175991	0.998596	0.999429	TRUE
AAK1	76.4008	0.172914	0.240826	0.718006	0.472754	0.779534	TRUE
AAMDC	186.103	-0.13074	0.177241	-0.737639	0.460734	0.773449	TRUE
AAMP	2643.59	-0.0284582	0.084493	-0.336812	0.736259	0.906601	TRUE
AANAT	0.0954085	0.0177085	0.102601	0.172596	0.862969	NA	TRUE
AAR2	486.433	-0.037545	0.102793	-0.365249	0.714926	0.897445	TRUE
AARD	0.129577	0.0177085	0.102601	0.172596	0.862969	NA	TRUE
AARS	5583.98	-0.0579648	0.0954183	-0.607481	0.543532	0.817262	TRUE
AARS2	249.929	0.306136	0.144909	2.1126	0.0346348	0.253972	TRUE
AARSD1	319.892	-0.168332	0.138466	-1.21569	0.224102	0.586212	TRUE
AASDH	156.049	0.115755	0.17179	0.673815	0.500429	0.794328	TRUE
AASDHPPT	575.005	-0.000822768	0.109353	-0.00752396	0.993997	0.997874	TRUE
AASS	5192.47	-0.271966	0.297031	-0.915616	0.359869	0.705289	TRUE
AATF	251.172	-0.189423	0.115193	-1.6444	0.100094	0.425392	TRUE
AATK	27.4166	0.390705	0.253714	1.53994	0.123575	0.465693	TRUE
ABAT	3788.26	-0.0505442	0.165967	-0.304543	0.760714	0.915704	TRUE
ABCA1	1502.16	-0.193798	0.160723	-1.20579	0.227899	0.590858	TRUE
ABCA12	0	NA	NA	NA	NA	NA	TRUE
ABCA13	2.73982	-0.407015	0.270069	-1.50708	0.131791	NA	TRUE
ABCA14	7.32864	0.269406	0.267838	1.00585	0.314486	0.669387	FALSE
ABCA15	0	NA	NA	NA	NA	NA	FALSE
ABCA16	75.3092	-0.749334	0.280493	-2.67149	0.00755152	0.106899	FALSE
ABCA17	5.07316	-0.533577	0.296252	-1.80109	0.0716883	0.368489	FALSE
ABCA2	1638.15	-0.524918	0.180437	-2.90915	0.00362415	0.0677721	TRUE
ABCA3	1842.56	0.28306	0.116017	2.43981	0.014695	0.158809	TRUE
ABCA4	29.6131	-0.551449	0.286317	-1.92601	0.0541034	0.321531	TRUE
ABCA5	95.8998	0.354516	0.16641	2.13038	0.0331402	0.249804	TRUE
ABCA6	4933.56	-0.19602	0.146108	-1.34161	0.179722	0.542134	TRUE
ABCA7	52.7246	0.173846	0.211328	0.822636	0.410715	0.73968	TRUE
ABCA8	622.737	0.231095	0.18503	1.24896	0.211681	0.576592	FALSE
ABCA8A	4427.43	-0.346075	0.217522	-1.59099	0.111611	0.444186	FALSE
ABCA9	376.07	-0.045564	0.245762	-0.185399	0.852916	0.953251	TRUE
ABCB10	315.608	0.241406	0.116298	2.07575	0.0379174	0.265244	TRUE
ABCB11	16553.6	-0.00986784	0.134079	-0.0735973	0.941331	0.980319	TRUE
ABCB1A	341.107	-0.239022	0.210358	-1.13626	0.255846	0.618089	FALSE
ABCB1B	1501.29	-0.62111	0.290796	-2.1359	0.0326879	0.248428	FALSE
ABCB4	2867.99	-0.138567	0.159444	-0.869067	0.384811	0.723327	TRUE
ABCB5	0	NA	NA	NA	NA	NA	TRUE
ABCB6	1123.2	0.0961845	0.117092	0.821443	0.411394	0.740457	TRUE
ABCB7	536.021	0.180771	0.14631	1.23553	0.216632	0.582194	TRUE
ABCB8	420.677	0.0605249	0.111398	0.54332	0.586909	0.839923	TRUE
ABCB9	44.3183	-0.406104	0.295689	-1.37342	0.169622	0.528427	TRUE
ABCC1	40.3247	-0.0906817	0.276664	-0.327768	0.743087	0.909554	TRUE
[truncated: 23,420 more rows]

## Sheet: S8 DEG analysis rat skin
Table S8. Result of DESeq2-analysis for differentially expressed genes during aging in rat skin.
[truncated: 23,480 more rows]

[truncated: 26 more sheets: S9 DEG analysis GMR blood, S10 DEG analysis GMR heart, S11 DEG analysis GMR kidney, S12 DEG analysis GMR liver, S13 DEG analysis GMR skin, S14 Power Analysis, S15 Enrichments rat blood , S16 Enrichments rat heart, S17 Enrichments rat kidney, S18 Enrichments rat liver, S19 Enrichments rat skin, S20 Enrichments GMR blood, S21 Enrichments GMR heart, S22 Enrichments GMR kidney, S23 Enrichments GMR liver, S24 Enrichments GMR skin, S25 DEG overlap blood, S26 DEG overlap heart, S27 DEG overlap kidney, S28 DEG overlap liver …]
